# Supplementary material
Source: PubMed Central journal article supplement (PMC7581237)
Supplement: ao0c03420_si_001.pdf [file ao0c03420_si_001.pdf]

## Supporting Information

### Identification of molecular network associated with neuroprotective effects of Yashtimadhu (*Glycyrrhiza glabra L.*) by quantitative proteomics of rotenone-induced Parkinson's disease model

Gayathree Karthikkeyan<sup>1</sup>, Mohd. Altaf Najar<sup>1</sup>, Ravishankar Pervaje<sup>2</sup>, Sameera Krishna Pervaje<sup>3</sup>, Prashant Kumar Modi<sup>1, \*</sup>, and Thottethodi Subrahmanya Keshava Prasad<sup>1, \*</sup>

<sup>1</sup> Center for Systems Biology and Molecular Medicine, Yenepoya Research Centre, Yenepoya (Deemed to be University), Mangalore -575018, India

<sup>2</sup> Sushrutha Ayurveda Hospital, Puttur 574201, India

<sup>3</sup> Yenepoya Medical College, Yenepoya (Deemed to be University), Mangalore -575018, India

\*Email: [keshav@yenepoya.edu.in](mailto:keshav@yenepoya.edu.in);

\*Email: [prashantmodi@yenepoya.edu.in](mailto:prashantmodi@yenepoya.edu.in)

#### Contains

**Figure S1:** (A) Western blotting analysis showing expression of TH after differentiation with retinoic acid treatment, (B) Bar graph showing the densitometry analysis of tyrosine hydroxylase expression, (C) Cell cytotoxicity analysis with different concentrations of rotenone at 24 h and 48 h, and (D) Cell cytotoxicity analysis with different concentrations of Yashtimadhu at 48h

**Table S1:** List of proteins identified and their respective abundances

**Table S2:** Identification transcription factors regulating proteins differentially expressed with rotenone

**Table S3:** Identification transcription factors regulating proteins differentially expressed with Yashtimadhu co-treatment

**Table S4:** Protein-protein interaction analysis using STRING

**Table S5:** Lead metabolites identified in Yashtimadhu choorna

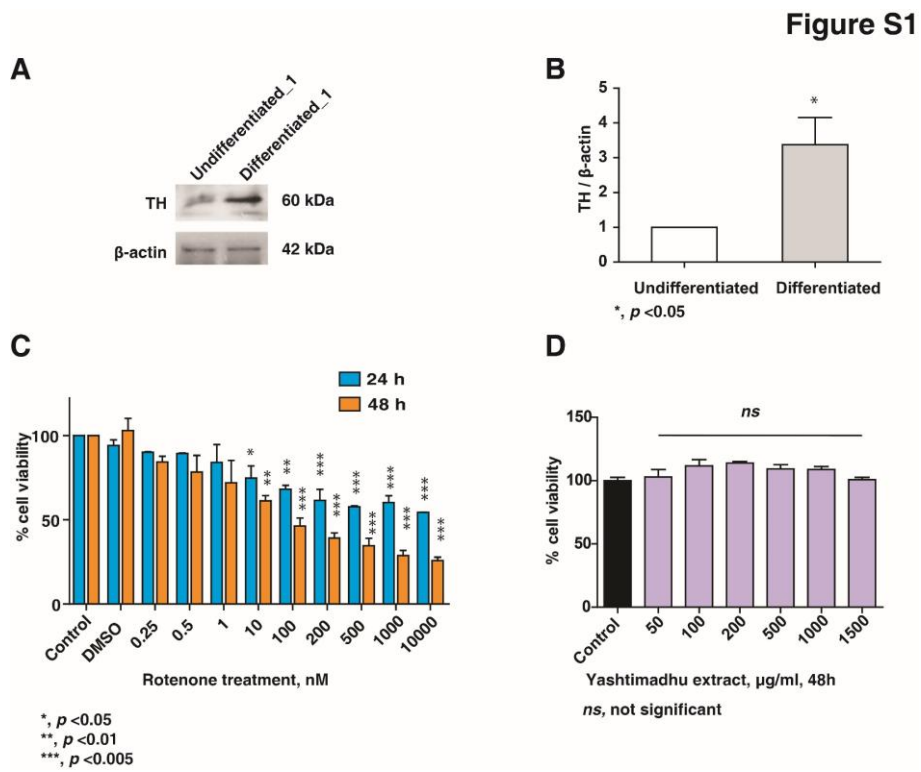

**Figure S1:** (A) Western blotting analysis showing expression of TH after differentiation with retinoic acid treatment, (B) Bar graph showing the densitometry analysis of tyrosine hydroxylase expression, (C) Cell cytotoxicity analysis with different concentrations of rotenone at 24 h and 48 h, and (D) Cell cytotoxicity analysis with different concentrations of Yashtimadhu at 48h

**Table S1: List of proteins with the respective fold change and statistical test values**

| Protein Accession | Gene Symbol | Description                                                   | Mean R/C | Mean RY/R | Mean RY/C | Mean Y/C | q-value _R/C | p-value _R/C | q-value _RY/R | p-value _RY/R |
|-------------------|-------------|---------------------------------------------------------------|----------|-----------|-----------|----------|--------------|--------------|---------------|---------------|
| XP_005251033.1    | PLEC        | plectin isoform X3                                            | 1.05     | 1.00      | 1.05      | 0.98     | 1.51E-02     | 1.40E-03     | 4.55E-02      | 3.61E-03      |
| XP_011515432.1    | PLEC        | plectin isoform X2                                            | 1.35     | 0.79      | 1.05      | 1.29     | 1.71E-01     | 8.81E-02     | 2.37E-01      | 1.24E-01      |
| NP_005091.2       | AKAP12      | A-kinase anchor protein 12 isoform 1                          | 0.81     | 1.14      | 0.92      | 1.02     | 2.80E-03     | 5.62E-05     | 1.80E-02      | 6.36E-05      |
| NP_001611.1       | AHNAK       | neuroblast differentiation-associated protein AHNAK isoform 1 | 0.97     | 1.04      | 1.01      | 1.09     | 2.03E-01     | 1.12E-01     | 9.03E-02      | 2.41E-02      |
| NP_006280.3       | TLN1        | talin-1                                                       | 1.05     | 1.01      | 1.06      | 1.02     | 5.39E-03     | 1.71E-04     | 3.53E-02      | 1.60E-03      |
| NP_008835.5       | PRKDC       | DNA-dependent protein kinase catalytic subunit isoform 1      | 1.07     | 0.93      | 1.00      | 0.99     | 4.23E-03     | 1.11E-04     | 3.31E-02      | 4.30E-04      |
| NP_001352542.1    | RRBP1       | ribosome-binding protein 1 isoform 1                          | 0.96     | 0.98      | 0.93      | 0.98     | 5.09E-02     | 1.36E-02     | 1.48E-01      | 5.90E-02      |
| XP_006717563.1    | VIM         | vimentin isoform X1                                           | 1.06     | 1.00      | 1.06      | 0.98     | 1.23E-01     | 5.46E-02     | 1.51E-01      | 6.09E-02      |
| NP_002464.1       | MYH9        | myosin-9                                                      | 1.06     | 1.02      | 1.07      | 1.05     | 4.50E-02     | 1.07E-02     | 1.27E-01      | 4.53E-02      |
| NP_001104026.1    | FLNA        | filamin-A isoform 2                                           | 1.03     | 1.14      | 1.18      | 1.03     | 4.71E-02     | 1.16E-02     | 3.53E-02      | 1.69E-03      |
| XP_005254502.1    | PKM         | pyruvate kinase PKM isoform X4                                | 1.07     | 0.98      | 1.05      | 1.06     | 1.07E-01     | 4.45E-02     | 9.78E-02      | 2.81E-02      |
| NP_001258898.1    | HSP90AB1    | heat shock protein HSP 90-beta isoform a                      | 1.12     | 0.97      | 1.09      | 0.99     | 3.39E-02     | 6.36E-03     | 5.18E-02      | 5.77E-03      |
| NP_001017963.2    | HSP90AA1    | heat shock protein HSP 90-alpha isoform 1                     | 1.08     | 1.02      | 1.11      | 0.99     | 8.97E-02     | 3.38E-02     | 1.62E-01      | 6.92E-02      |
| NP_005338.1       | HSPA5       | endoplasmic reticulum chaperone BiP precursor                 | 1.11     | 1.05      | 1.16      | 0.99     | 3.89E-02     | 8.21E-03     | 1.00E-01      | 2.93E-02      |
| NP_001275582.1    | CLTC        | clathrin heavy chain 1 isoform 2                              | 1.04     | 1.01      | 1.06      | 1.03     | 2.44E-02     | 3.36E-03     | 2.57E-01      | 1.39E-01      |
| NP_001952.1       | EEF2        | elongation factor 2                                           | 1.02     | 1.00      | 1.02      | 0.96     | 2.88E-01     | 1.81E-01     | 3.01E-01      | 1.78E-01      |
| NP_002147.2       | HSPD1       | 60 kDa heat shock protein, mitochondrial                      | 0.99     | 1.05      | 1.04      | 0.98     | 7.37E-01     | 6.52E-01     | 2.20E-01      | 1.10E-01      |
| NP_002853.2       | PYGB        | glycogen phosphorylase, brain form                            | 1.20     | 1.03      | 1.23      | 1.12     | 3.45E-03     | 7.89E-05     | 3.31E-02      | 4.57E-04      |
| XP_011522182.1    | MYH10       | myosin-10 isoform X3                                          | 0.99     | 0.99      | 0.98      | 1.03     | 2.60E-01     | 1.58E-01     | 9.95E-01      | 9.93E-01      |
| NP_001419.1       | ENO1        | alpha-enolase isoform 1                                       | 1.02     | 1.05      | 1.07      | 0.99     | 3.10E-02     | 5.20E-03     | 1.36E-01      | 5.05E-02      |
| XP_011541100.1    | HSPA8       | heat shock cognate 71 kDa protein isoform X1                  | 1.02     | 1.00      | 1.02      | 1.02     | 3.52E-01     | 2.36E-01     | 4.18E-01      | 2.90E-01      |
| NP_733821.1       | LMNA        | lamin isoform A                                               | 1.13     | 0.98      | 1.11      | 1.07     | 8.44E-03     | 3.97E-04     | 3.31E-02      | 5.24E-04      |
| NP_003118.2       | SPTAN1      | spectrin alpha chain, non-erythrocytic 1 isoform 2            | 0.88     | 1.02      | 0.90      | 0.94     | 2.51E-03     | 4.33E-05     | 3.53E-02      | 1.69E-03      |
| NP_006608.1       | NES         | nestin                                                        | 0.91     | 0.99      | 0.90      | 0.93     | 4.12E-03     | 1.03E-04     | 3.53E-02      | 1.73E-03      |
| XP_016877802.1    | PKM         | pyruvate kinase PKM isoform X5                                | 1.08     | 0.98      | 1.06      | 1.04     | 1.05E-01     | 4.34E-02     | 2.57E-01      | 1.39E-01      |
| NP_001367.2       | DYNC1H1     | cytoplasmic dynein 1 heavy chain 1                            | 1.10     | 0.98      | 1.08      | 1.03     | 2.43E-03     | 3.85E-05     | 3.69E-02      | 1.96E-03      |
| NP_003290.1       | HSP90B1     | endoplasmic precursor                                         | 1.03     | 1.05      | 1.09      | 0.97     | 1.60E-02     | 1.55E-03     | 3.47E-01      | 2.20E-01      |
| NP_001605.1       | ACTG1       | actin, cytoplasmic 2                                          | 1.06     | 1.08      | 1.14      | 1.14     | 5.01E-01     | 3.83E-01     | 8.03E-01      | 7.30E-01      |
| NP_001092.1       | ACTB        | actin, cytoplasmic 1                                          | 1.01     | 1.05      | 1.06      | 1.02     | 3.08E-01     | 1.96E-01     | 1.15E-01      | 3.77E-02      |
| NP_004902.1       | PDIA4       | protein disulfide-isomerase A4 isoform 2 precursor            | 1.03     | 1.05      | 1.08      | 0.95     | 3.05E-01     | 1.94E-01     | 3.45E-01      | 2.17E-01      |
| NP_006827.1       | GCN1        | eIF-2-alpha kinase activator GCN1                             | 1.02     | 1.01      | 1.03      | 1.00     | 2.80E-03     | 5.41E-05     | 2.19E-01      | 1.09E-01      |
| NP_005372.2       | NCL         | nucleolin                                                     | 0.77     | 1.07      | 0.82      | 0.85     | 1.73E-02     | 1.83E-03     | 3.53E-02      | 1.40E-03      |
| XP_016885266.1    | UBA1        | ubiquitin-like modifier-activating enzyme 1 isoform X1        | 1.12     | 1.00      | 1.11      | 1.01     | 3.16E-02     | 5.41E-03     | 5.01E-02      | 5.12E-03      |
| NP_002037.2       | GAPDH       | glyceraldehyde-3-phosphate dehydrogenase isoform 1            | 1.08     | 0.99      | 1.07      | 1.00     | 4.67E-02     | 1.15E-02     | 6.88E-02      | 1.28E-02      |
| NP_006810.1       | STIP1       | stress-induced-phosphoprotein 1 isoform b                     | 0.87     | 1.07      | 0.93      | 0.96     | 1.27E-02     | 9.22E-04     | 3.31E-02      | 4.90E-04      |
| NP_002145.3       | HSPA4       | heat shock 70 kDa protein 4                                   | 1.10     | 0.98      | 1.09      | 1.00     | 4.23E-04     | 2.03E-06     | 5.35E-02      | 6.49E-03      |
| NP_005900.2       | MAP1B       | microtubule-associated protein 1B isoform 1                   | 0.90     | 1.04      | 0.94      | 0.94     | 7.16E-03     | 2.91E-04     | 3.31E-02      | 3.65E-04      |
| NP_004915.2       | ACTN4       | alpha-actinin-4 isoform 1                                     | 1.06     | 1.03      | 1.09      | 1.01     | 3.93E-02     | 8.38E-03     | 1.31E-01      | 4.78E-02      |
| NP_009057.1       | VCP         | transitional endoplasmic reticulum ATPase isoform 1           | 1.04     | 1.01      | 1.05      | 0.97     | 2.38E-02     | 3.22E-03     | 1.22E-01      | 4.19E-02      |
| NP_005304.3       | PDIA3       | protein disulfide-isomerase A3 precursor                      | 1.00     | 1.07      | 1.07      | 1.00     | 9.14E-01     | 8.76E-01     | 9.33E-02      | 2.60E-02      |
| XP_016860269.1    | SPTBN1      | spectrin beta chain, non-erythrocytic 1 isoform X1            | 0.97     | 0.96      | 0.93      | 0.96     | 1.03E-01     | 4.16E-02     | 2.87E-01      | 1.66E-01      |
| NP_000282.1       | PGK1        | phosphoglycerate kinase 1                                     | 1.08     | 1.01      | 1.10      | 1.07     | 3.05E-02     | 5.09E-03     | 5.62E-02      | 7.34E-03      |

|                |         |                                                                    |      |      |      |      |          |          |          |          |
|----------------|---------|--------------------------------------------------------------------|------|------|------|------|----------|----------|----------|----------|
| NP_004125.3    | HSPA9   | stress-70 protein, mitochondrial precursor                         | 1.01 | 1.02 | 1.03 | 1.01 | 3.68E-01 | 2.51E-01 | 3.82E-01 | 2.53E-01 |
| NP_004437.2    | EPRS1   | bifunctional glutamate/proline--tRNA ligase                        | 1.12 | 1.01 | 1.12 | 1.05 | 1.60E-02 | 1.54E-03 | 5.00E-02 | 4.90E-03 |
| NP_006079.1    | TUBB4B  | tubulin beta-4B chain                                              | 0.94 | 0.97 | 0.91 | 0.90 | 3.13E-02 | 5.34E-03 | 1.46E-01 | 5.80E-02 |
| NP_001677.2    | ATP5F1B | ATP synthase subunit beta, mitochondrial precursor                 | 1.09 | 0.95 | 1.04 | 1.00 | 1.06E-02 | 5.99E-04 | 3.38E-02 | 8.52E-04 |
| NP_004095.4    | FASN    | fatty acid synthase                                                | 0.99 | 0.98 | 0.98 | 1.03 | 5.67E-01 | 4.57E-01 | 6.81E-01 | 5.78E-01 |
| NP_006635.2    | HSPH1   | heat shock protein 105 kDa isoform 1                               | 1.03 | 0.97 | 1.00 | 0.98 | 5.36E-02 | 1.50E-02 | 5.20E-02 | 5.88E-03 |
| NP_001244957.1 | TKT     | transketolase isoform 2                                            | 1.10 | 1.01 | 1.12 | 1.09 | 9.04E-03 | 4.47E-04 | 5.64E-02 | 7.43E-03 |
| NP_003861.1    | IQGAP1  | ras GTPase-activating-like protein IQGAP1                          | 1.14 | 1.00 | 1.14 | 1.05 | 6.12E-03 | 2.14E-04 | 3.53E-02 | 1.34E-03 |
| XP_016884692.1 | HUWE1   | E3 ubiquitin-protein ligase HUWE1 isoform X8                       | 1.08 | 0.97 | 1.05 | 1.01 | 1.46E-02 | 1.29E-03 | 3.45E-02 | 1.04E-03 |
| XP_005271449.1 | HYOU1   | hypoxia up-regulated protein 1 isoform X1                          | 1.06 | 1.05 | 1.12 | 1.04 | 3.29E-02 | 5.89E-03 | 2.23E-01 | 1.12E-01 |
| XP_006720201.1 | KTN1    | kinectin isoform X1                                                | 1.05 | 1.01 | 1.06 | 1.02 | 2.47E-02 | 3.44E-03 | 1.36E-01 | 5.13E-02 |
| NP_821133.1    | TUBB    | tubulin beta chain isoform b                                       | 0.94 | 0.95 | 0.90 | 0.91 | 6.28E-02 | 1.95E-02 | 5.08E-01 | 3.83E-01 |
| NP_006422.1    | CCT2    | T-complex protein 1 subunit beta isoform 1                         | 1.02 | 1.04 | 1.06 | 0.99 | 1.71E-01 | 8.81E-02 | 4.91E-01 | 3.65E-01 |
| NP_001341087.1 | ACSL3   | long-chain-fatty-acid--CoA ligase 3                                | 1.14 | 1.10 | 1.26 | 1.15 | 3.72E-02 | 7.50E-03 | 2.70E-01 | 1.51E-01 |
| NP_000692.2    | ATP1A1  | sodium/potassium-transporting ATPase subunit alpha-1 isoform a     | 0.98 | 1.07 | 1.06 | 1.11 | 4.08E-01 | 2.88E-01 | 7.83E-02 | 1.69E-02 |
| NP_001888.2    | CSPG4   | chondroitin sulfate proteoglycan 4 precursor                       | 1.06 | 1.07 | 1.13 | 1.14 | 3.05E-02 | 5.06E-03 | 6.25E-01 | 5.14E-01 |
| XP_011543365.1 | NUMA1   | nuclear mitotic apparatus protein 1 isoform X1                     | 0.98 | 0.96 | 0.94 | 1.01 | 5.49E-02 | 1.56E-02 | 8.90E-02 | 2.34E-02 |
| NP_001596.2    | AARS1   | alanine--tRNA ligase, cytoplasmic                                  | 1.10 | 1.08 | 1.19 | 1.05 | 5.48E-02 | 1.55E-02 | 5.09E-01 | 3.85E-01 |
| NP_004492.2    | HNRNPU  | heterogeneous nuclear ribonucleoprotein U isoform b                | 0.81 | 1.21 | 0.98 | 0.86 | 5.25E-02 | 1.45E-02 | 4.72E-02 | 4.06E-03 |
| NP_114032.2    | HNRNPU  | heterogeneous nuclear ribonucleoprotein U isoform a                | 1.06 | 0.93 | 0.98 | 1.01 | 1.58E-02 | 1.51E-03 | 4.32E-02 | 2.77E-02 |
| XP_011529261.1 | MSN     | moesin isoform X1                                                  | 1.09 | 1.05 | 1.14 | 1.09 | 1.49E-02 | 1.33E-03 | 8.79E-02 | 2.28E-02 |
| NP_000173.2    | HADHA   | trifunctional enzyme subunit alpha, mitochondrial precursor        | 1.08 | 0.97 | 1.04 | 1.06 | 5.09E-02 | 1.35E-02 | 6.09E-02 | 9.43E-03 |
| NP_000691.1    | ANXA1   | annexin A1                                                         | 1.09 | 1.00 | 1.09 | 1.07 | 2.87E-02 | 4.56E-03 | 5.00E-02 | 4.81E-03 |
| NP_000909.2    | P4HB    | protein disulfide-isomerase precursor                              | 0.94 | 1.08 | 1.02 | 0.92 | 1.10E-01 | 4.59E-02 | 6.19E-02 | 9.74E-03 |
| NP_004030.1    | ANXA2   | annexin A2 isoform 2                                               | 1.16 | 1.03 | 1.20 | 1.04 | 1.46E-02 | 1.26E-03 | 5.79E-02 | 8.15E-03 |
| NP_908932.1    | ALDOA   | fructose-bisphosphate aldolase A isoform 1                         | 1.05 | 1.05 | 1.10 | 1.08 | 1.46E-02 | 1.26E-03 | 4.74E-01 | 3.47E-01 |
| NP_573566.2    | LRPPRC  | leucine-rich PPR motif-containing protein, mitochondrial precursor | 1.00 | 0.94 | 0.95 | 1.04 | 7.73E-01 | 6.95E-01 | 7.02E-02 | 1.34E-02 |
| NP_002511.1    | NPM1    | nucleophosmin isoform 1                                            | 0.85 | 1.01 | 0.86 | 0.92 | 1.89E-02 | 2.13E-03 | 3.98E-02 | 2.32E-03 |
| NP_001032827.1 | NPM1    | nucleophosmin isoform 3                                            | 0.97 | 1.12 | 1.09 | 1.00 | 5.33E-01 | 4.18E-01 | 1.35E-01 | 5.01E-02 |
| NP_001152759.1 | TPI1    | triosephosphate isomerase isoform 2                                | 1.04 | 0.99 | 1.02 | 1.04 | 1.24E-01 | 5.55E-02 | 1.15E-01 | 3.77E-02 |
| NP_003312.3    | TUFM    | elongation factor Tu, mitochondrial isoform 1 precursor            | 1.07 | 0.98 | 1.05 | 1.02 | 5.14E-02 | 1.39E-02 | 5.79E-02 | 8.08E-03 |
| NP_001275905.1 | XRCC6   | X-ray repair cross-complementing protein 6 isoform 1               | 1.09 | 0.96 | 1.05 | 1.01 | 8.41E-03 | 3.94E-04 | 4.75E-02 | 4.13E-03 |
| NP_055205.2    | SND1    | staphylococcal nuclease domain-containing protein 1                | 1.06 | 1.01 | 1.08 | 1.06 | 2.70E-02 | 4.10E-03 | 5.34E-02 | 6.31E-03 |
| NP_066964.1    | XRCC5   | X-ray repair cross-complementing protein 5                         | 1.05 | 0.95 | 1.00 | 0.99 | 8.45E-02 | 3.09E-02 | 6.14E-02 | 9.60E-03 |
| NP_006816.2    | CKAP4   | cytoskeleton-associated protein 4                                  | 1.04 | 1.03 | 1.07 | 0.97 | 1.00E-01 | 4.00E-02 | 4.25E-01 | 2.97E-01 |
| NP_036205.1    | CCT5    | T-complex protein 1 subunit epsilon isoform a                      | 1.06 | 1.00 | 1.06 | 1.01 | 3.41E-02 | 6.44E-03 | 5.50E-02 | 6.98E-03 |
| NP_005909.2    | MDH2    | malate dehydrogenase, mitochondrial isoform 1 precursor            | 1.09 | 0.98 | 1.07 | 1.01 | 3.04E-02 | 5.04E-03 | 5.18E-02 | 5.68E-03 |
| NP_001276052.1 | TUBB4A  | tubulin beta-4A chain isoform 1                                    | 0.92 | 1.25 | 1.13 | 0.98 | 4.22E-01 | 3.02E-01 | 5.66E-01 | 4.47E-01 |
| NP_006077.2    | TUBB3   | tubulin beta-3 chain isoform 1                                     | 0.93 | 0.90 | 0.84 | 0.88 | 3.39E-02 | 6.30E-03 | 2.19E-01 | 1.10E-01 |
| NP_001348.2    | DHX9    | ATP-dependent RNA helicase A                                       | 1.08 | 0.92 | 1.00 | 1.02 | 7.41E-03 | 3.07E-04 | 3.53E-02 | 1.57E-03 |
| NP_002131.2    | HNRNPK  | heterogeneous nuclear ribonucleoprotein K isoform a                | 1.31 | 0.83 | 1.08 | 1.11 | 2.53E-01 | 1.51E-01 | 1.63E-01 | 6.96E-02 |
| NP_001337407.1 | CAPI    | adenylyl cyclase-associated protein 1 isoform a                    | 0.77 | 1.38 | 1.06 | 0.88 | 2.09E-01 | 1.17E-01 | 9.78E-02 | 2.81E-02 |
| XP_016858683.1 | IMMT    | MICOS complex subunit MIC60 isoform X1                             | 1.08 | 0.98 | 1.06 | 1.05 | 4.79E-02 | 1.20E-02 | 5.92E-02 | 8.64E-03 |
| NP_006576.2    | CCT8    | T-complex protein 1 subunit theta isoform 1                        | 1.14 | 0.98 | 1.12 | 1.05 | 5.23E-02 | 1.44E-02 | 6.60E-02 | 1.13E-02 |
| NP_005337.2    | HSPA1B  | heat shock 70 kDa protein 1B                                       | 1.09 | 1.03 | 1.12 | 1.04 | 4.71E-02 | 1.16E-02 | 1.18E-01 | 3.98E-02 |
| NP_001393.1    | EEF1A1  | elongation factor 1-alpha 1                                        | 1.13 | 0.96 | 1.08 | 0.99 | 4.79E-02 | 1.20E-02 | 5.44E-02 | 6.87E-03 |
| NP_004037.1    | ATP5F1A | ATP synthase subunit alpha, mitochondrial isoform a precursor      | 1.09 | 0.97 | 1.06 | 1.02 | 1.99E-02 | 2.35E-03 | 5.85E-02 | 8.43E-03 |

|                |           |                                                                          |      |      |      |      |          |          |          |          |
|----------------|-----------|--------------------------------------------------------------------------|------|------|------|------|----------|----------|----------|----------|
| NP_001337414.1 | CAPI      | adenylyl cyclase-associated protein 1 isoform b                          | 1.10 | 1.01 | 1.11 | 1.06 | 1.44E-02 | 1.22E-03 | 4.43E-02 | 3.17E-03 |
| NP_003283.2    | TPR       | nucleoprotein TPR                                                        | 0.98 | 1.01 | 0.99 | 0.96 | 1.43E-02 | 1.17E-03 | 1.45E-01 | 5.68E-02 |
| NP_006073.2    | TUBA1B    | tubulin alpha-1B chain                                                   | 0.98 | 0.94 | 0.92 | 1.00 | 7.28E-01 | 6.41E-01 | 4.44E-01 | 3.16E-01 |
| NP_005959.2    | HNRNPM    | heterogeneous nuclear ribonucleoprotein M isoform a                      | 0.98 | 1.00 | 0.98 | 0.96 | 1.32E-01 | 6.03E-02 | 2.29E-01 | 1.17E-01 |
| NP_006421.2    | CCT4      | T-complex protein 1 subunit delta isoform a                              | 1.05 | 0.98 | 1.04 | 1.01 | 9.54E-02 | 3.68E-02 | 1.45E-01 | 5.69E-02 |
| XP_011526286.2 | ILF3      | interleukin enhancer-binding factor 3 isoform X1                         | 1.04 | 0.99 | 1.03 | 1.01 | 7.19E-02 | 2.38E-02 | 1.07E-01 | 3.32E-02 |
| XP_011532005.1 | MAP4      | microtubule-associated protein 4 isoform X2                              | 0.90 | 1.04 | 0.93 | 0.94 | 6.30E-02 | 1.96E-02 | 8.74E-02 | 2.25E-02 |
| NP_001060.1    | TUBB2A    | tubulin beta-2A chain isoform 1                                          | 0.94 | 1.03 | 0.97 | 0.96 | 7.53E-02 | 2.57E-02 | 6.90E-02 | 1.30E-02 |
| NP_005312.1    | H1-4      | histone H1.4                                                             | 0.72 | 1.17 | 0.85 | 0.79 | 3.84E-02 | 7.90E-03 | 5.18E-02 | 5.75E-03 |
| NP_054733.2    | SNRNP200  | U5 small nuclear ribonucleoprotein 200 kDa helicase                      | 1.05 | 0.93 | 0.97 | 1.01 | 4.47E-02 | 1.06E-02 | 3.53E-02 | 1.72E-03 |
| NP_055752.1    | INPP5F    | phosphatidylinositol phosphatase SAC2 isoform 1                          | 1.10 | 1.05 | 1.16 | 1.16 | 2.86E-02 | 4.49E-03 | 1.01E-01 | 2.98E-02 |
| NP_005498.1    | CFL1      | cofilin-1                                                                | 0.99 | 0.99 | 0.97 | 1.02 | 2.87E-01 | 1.80E-01 | 7.69E-01 | 6.85E-01 |
| XP_024309291.1 | MAP4      | microtubule-associated protein 4 isoform X1                              | 1.00 | 0.91 | 0.87 | 0.88 | 9.53E-01 | 9.34E-01 | 8.37E-01 | 7.72E-01 |
| NP_006420.1    | CCT7      | T-complex protein 1 subunit eta isoform a                                | 1.11 | 1.01 | 1.12 | 1.04 | 5.02E-04 | 3.07E-06 | 1.80E-02 | 5.54E-05 |
| NP_005989.3    | CCT3      | T-complex protein 1 subunit gamma isoform a                              | 1.03 | 1.07 | 1.10 | 0.99 | 2.14E-01 | 1.20E-01 | 1.84E-01 | 8.46E-02 |
| XP_005245768.1 | HNRNPR    | heterogeneous nuclear ribonucleoprotein R isoform X2                     | 1.00 | 0.96 | 0.96 | 0.93 | 8.53E-01 | 7.94E-01 | 1.65E-01 | 7.10E-02 |
| NP_004334.1    | CALR      | calreticulin precursor                                                   | 0.89 | 1.04 | 0.92 | 0.92 | 1.55E-02 | 1.46E-03 | 3.49E-02 | 1.15E-03 |
| NP_064502.9    | LARS1     | leucine--tRNA ligase, cytoplasmic isoform 1                              | 1.09 | 0.98 | 1.06 | 1.03 | 2.95E-02 | 4.80E-03 | 5.11E-02 | 5.38E-03 |
| NP_001129172.1 | YWHAZ     | 14-3-3 protein zeta/delta                                                | 0.99 | 1.03 | 1.02 | 0.91 | 3.59E-01 | 2.42E-01 | 9.59E-02 | 2.74E-02 |
| XP_016877209.1 | ACTN1     | alpha-actinin-1 isoform X1                                               | 1.05 | 1.01 | 1.06 | 1.03 | 7.39E-02 | 2.48E-02 | 1.15E-01 | 3.79E-02 |
| NP_001290043.1 | TUBA1C    | tubulin alpha-1C chain isoform a                                         | 0.93 | 0.93 | 0.86 | 0.87 | 9.79E-02 | 3.82E-02 | 9.42E-01 | 9.14E-01 |
| NP_056474.2    | RSL1D1    | ribosomal L1 domain-containing protein 1                                 | 1.01 | 1.04 | 1.05 | 1.03 | 7.17E-02 | 2.36E-02 | 7.18E-02 | 1.42E-02 |
| NP_001339990.1 | GSN       | gelsolin isoform b                                                       | 0.97 | 1.11 | 1.08 | 1.03 | 1.51E-02 | 1.39E-03 | 3.31E-02 | 3.91E-04 |
| NP_002878.2    | RARS1     | arginine--tRNA ligase, cytoplasmic                                       | 1.09 | 0.95 | 1.04 | 1.01 | 7.06E-03 | 2.83E-04 | 4.30E-02 | 2.67E-03 |
| NP_001290203.1 | ACLY      | ATP-citrate synthase isoform 3                                           | 1.20 | 0.98 | 1.18 | 1.13 | 4.28E-01 | 3.08E-01 | 4.16E-01 | 2.88E-01 |
| NP_005310.1    | H1-2      | histone H1.2                                                             | 0.74 | 1.08 | 0.80 | 0.82 | 1.86E-02 | 2.05E-03 | 4.59E-02 | 3.83E-03 |
| XP_005252022.1 | HNRNPK    | heterogeneous nuclear ribonucleoprotein K isoform X3                     | 0.94 | 0.96 | 0.90 | 0.93 | 3.29E-02 | 5.88E-03 | 2.96E-01 | 1.74E-01 |
| NP_001290204.1 | ACLY      | ATP-citrate synthase isoform 4                                           | 1.04 | 0.99 | 1.03 | 1.02 | 7.03E-02 | 2.30E-02 | 1.39E-01 | 5.30E-02 |
| NP_001257376.1 | ACADVL    | very long-chain specific acyl-CoA dehydrogenase, mitochondrial isoform 3 | 1.13 | 1.01 | 1.14 | 1.13 | 6.22E-03 | 2.20E-04 | 5.94E-02 | 8.71E-03 |
| NP_005222.2    | CTTN      | src substrate contactin isoform a                                        | 0.78 | 1.08 | 0.84 | 0.89 | 2.04E-04 | 4.35E-07 | 1.51E-03 | 4.01E-07 |
| NP_006752.1    | YWHAE     | 14-3-3 protein epsilon                                                   | 0.88 | 1.04 | 0.92 | 0.90 | 1.37E-02 | 1.10E-03 | 3.38E-02 | 7.45E-04 |
| NP_001753.1    | CCT6A     | T-complex protein 1 subunit zeta isoform a                               | 1.05 | 1.06 | 1.11 | 1.02 | 7.54E-02 | 2.58E-02 | 7.86E-01 | 7.07E-01 |
| NP_001302466.1 | LDHB      | L-lactate dehydrogenase B chain isoform LDHBx                            | 1.09 | 0.95 | 1.03 | 1.02 | 6.22E-02 | 1.91E-02 | 6.88E-02 | 1.28E-02 |
| XP_006713191.1 | IMPDH2    | inosine-5'-monophosphate dehydrogenase 2 isoform X1                      | 1.10 | 0.98 | 1.07 | 1.02 | 4.60E-02 | 1.12E-02 | 6.85E-02 | 1.26E-02 |
| NP_005311.1    | H1-3      | histone H1.3                                                             | 0.76 | 1.11 | 0.84 | 0.83 | 9.81E-04 | 8.08E-06 | 3.31E-02 | 5.97E-04 |
| NP_056991.2    | LAP3      | cytosol aminopeptidase                                                   | 1.04 | 0.98 | 1.02 | 1.05 | 1.43E-02 | 1.18E-03 | 3.38E-02 | 7.99E-04 |
| NP_004719.2    | DDX21     | nucleolar RNA helicase 2 isoform 1                                       | 0.92 | 1.00 | 0.93 | 0.96 | 2.93E-02 | 4.73E-03 | 5.01E-02 | 5.11E-03 |
| NP_060918.2    | CAND1     | cullin-associated NEDD8-dissociated protein 1 isoform 1                  | 1.07 | 0.96 | 1.03 | 1.00 | 1.07E-02 | 6.55E-04 | 6.09E-02 | 9.45E-03 |
| NP_110379.2    | TCP1      | T-complex protein 1 subunit alpha isoform a                              | 1.14 | 0.95 | 1.09 | 1.02 | 1.70E-02 | 1.77E-03 | 3.98E-02 | 2.31E-03 |
| NP_004784.2    | LONP1     | lon protease homolog, mitochondrial isoform 1 precursor                  | 1.16 | 0.96 | 1.11 | 1.07 | 4.23E-04 | 1.90E-06 | 3.53E-02 | 1.40E-03 |
| NP_001609.2    | PARP1     | poly [ADP-ribose] polymerase 1                                           | 1.05 | 1.00 | 1.05 | 1.02 | 1.34E-02 | 1.02E-03 | 7.21E-02 | 1.46E-02 |
| XP_005249786.1 | HNRNPA2B1 | heterogeneous nuclear ribonucleoproteins A2/B1 isoform X1                | 0.87 | 1.02 | 0.89 | 0.92 | 2.55E-02 | 3.63E-03 | 4.47E-02 | 3.38E-03 |
| NP_733765.1    | ATP2A2    | sarcoplasmic/endoplasmic reticulum calcium ATPase 2 isoform b            | 1.09 | 0.99 | 1.09 | 1.01 | 2.55E-02 | 3.61E-03 | 4.55E-02 | 3.65E-03 |
| NP_064505.1    | UGGT1     | UDP-glucose:glycoprotein glucosyltransferase 1 precursor                 | 1.12 | 1.04 | 1.16 | 1.06 | 5.38E-02 | 1.52E-02 | 1.62E-01 | 6.93E-02 |
| NP_000959.2    | RPL4      | 60S ribosomal protein L4                                                 | 1.08 | 1.02 | 1.10 | 0.98 | 8.44E-02 | 3.09E-02 | 2.27E-01 | 1.15E-01 |
| XP_016865667.1 | SYNCRIP   | heterogeneous nuclear ribonucleoprotein Q isoform X4                     | 0.97 | 1.00 | 0.97 | 0.92 | 3.38E-02 | 6.16E-03 | 1.04E-01 | 3.13E-02 |
| NP_001353228.1 | KHSRP     | far upstream element-binding protein 2 isoform 2                         | 0.84 | 1.02 | 0.86 | 0.92 | 1.55E-02 | 1.46E-03 | 3.53E-02 | 1.18E-03 |

|                |          |                                                                                    |      |      |      |      |          |          |          |          |
|----------------|----------|------------------------------------------------------------------------------------|------|------|------|------|----------|----------|----------|----------|
| NP_001616.1    | AK2      | adenylate kinase 2, mitochondrial isoform a                                        | 1.06 | 1.00 | 1.06 | 1.08 | 1.72E-01 | 8.90E-02 | 1.94E-01 | 9.25E-02 |
| NP_005557.1    | LDHA     | L-lactate dehydrogenase A chain isoform 1                                          | 1.02 | 0.98 | 0.99 | 1.03 | 4.02E-01 | 2.81E-01 | 1.80E-01 | 8.21E-02 |
| NP_003698.1    | RUVBL1   | ruvB-like 1 isoform 1                                                              | 1.06 | 0.96 | 1.02 | 1.02 | 3.54E-02 | 6.80E-03 | 5.11E-02 | 5.45E-03 |
| XP_005268559.1 | TCOF1    | treacle protein isoform X1                                                         | 0.97 | 1.02 | 0.99 | 1.05 | 1.51E-02 | 1.39E-03 | 5.35E-02 | 6.60E-03 |
| XP_016877118.1 | WARS1    | tryptophan-tRNA ligase, cytoplasmic isoform X1                                     | 1.04 | 1.04 | 1.08 | 0.97 | 2.66E-02 | 3.97E-03 | 3.62E-01 | 2.34E-01 |
| NP_001091868.1 | COPA     | coatomer subunit alpha isoform 1                                                   | 1.03 | 0.94 | 0.96 | 1.00 | 7.97E-02 | 2.79E-02 | 4.47E-02 | 3.43E-03 |
| NP_002897.1    | RDX      | radixin isoform 2                                                                  | 1.05 | 1.01 | 1.05 | 1.04 | 4.58E-01 | 3.38E-01 | 6.09E-01 | 4.95E-01 |
| NP_001407.1    | EIF4A1   | eukaryotic initiation factor 4A-1 isoform 1                                        | 0.88 | 0.90 | 0.80 | 0.98 | 3.13E-02 | 5.29E-03 | 2.90E-01 | 1.68E-01 |
| XP_011537116.1 | EEA1     | early endosome antigen 1 isoform X1                                                | 0.97 | 1.02 | 0.99 | 1.03 | 3.35E-01 | 2.19E-01 | 2.90E-01 | 1.69E-01 |
| NP_001357270.1 | HMGB1    | high mobility group protein B1 isoform 1                                           | 0.78 | 1.03 | 0.80 | 0.86 | 2.86E-02 | 4.53E-03 | 4.78E-02 | 4.19E-03 |
| XP_011535013.1 | HNRNPC   | heterogeneous nuclear ribonucleoproteins C1/C2 isoform X1                          | 0.99 | 0.92 | 0.91 | 0.96 | 4.24E-01 | 3.05E-01 | 7.52E-02 | 1.58E-02 |
| NP_004035.2    | ATIC     | bifunctional purine biosynthesis protein PURH                                      | 1.08 | 0.97 | 1.05 | 1.03 | 1.48E-03 | 1.54E-05 | 3.38E-02 | 8.63E-04 |
| NP_004512.1    | KIF5B    | kinesin-1 heavy chain                                                              | 1.05 | 1.02 | 1.07 | 1.04 | 5.90E-02 | 1.76E-02 | 1.27E-01 | 4.55E-02 |
| NP_061322.2    | MATR3    | matrin-3 isoform a                                                                 | 1.01 | 0.96 | 0.97 | 1.00 | 6.87E-01 | 5.94E-01 | 2.41E-01 | 1.27E-01 |
| NP_000179.2    | HK1      | hexokinase-1 isoform HK1                                                           | 1.03 | 0.96 | 0.99 | 1.03 | 3.89E-02 | 8.17E-03 | 4.67E-02 | 3.94E-03 |
| NP_001091.1    | ACTA1    | actin, alpha skeletal muscle                                                       | 1.02 | 1.00 | 1.02 | 1.06 | 5.14E-01 | 3.98E-01 | 5.22E-01 | 3.98E-01 |
| NP_001145.1    | ANXA5    | annexin A5                                                                         | 1.10 | 0.98 | 1.08 | 1.03 | 2.82E-02 | 4.33E-03 | 6.73E-02 | 1.20E-02 |
| NP_005564.1    | LMNB1    | lamin-B1 isoform 1                                                                 | 1.08 | 0.99 | 1.07 | 1.04 | 3.19E-02 | 5.52E-03 | 1.43E-01 | 5.56E-02 |
| NP_001157789.1 | FLNB     | filamin-B isoform 1                                                                | 1.05 | 1.11 | 1.17 | 1.11 | 1.64E-01 | 8.31E-02 | 2.01E-01 | 9.74E-02 |
| NP_005106.2    | MVP      | major vault protein isoform 1                                                      | 1.14 | 1.00 | 1.15 | 1.08 | 1.66E-02 | 1.70E-03 | 4.33E-02 | 2.84E-03 |
| NP_000684.2    | ALDH1A3  | aldehyde dehydrogenase family 1 member A3 isoform 1                                | 0.97 | 1.03 | 1.00 | 1.05 | 1.33E-01 | 6.15E-02 | 7.51E-02 | 1.56E-02 |
| NP_938148.1    | GANAB    | neutral alpha-glucosidase AB isoform 2 precursor                                   | 1.13 | 1.00 | 1.13 | 1.03 | 5.66E-02 | 1.63E-02 | 7.83E-02 | 1.69E-02 |
| NP_112420.1    | HNRNPA1  | heterogeneous nuclear ribonucleoprotein A1 isoform b                               | 0.85 | 1.01 | 0.86 | 0.91 | 3.38E-02 | 6.17E-03 | 5.08E-02 | 5.31E-03 |
| NP_002941.1    | RPN1     | dolichyl-diphosphooligosaccharide--protein glycosyltransferase subunit 1 precursor | 1.08 | 0.97 | 1.04 | 1.03 | 1.86E-03 | 2.42E-05 | 3.53E-02 | 1.20E-03 |
| NP_001036816.1 | TPM3     | tropomyosin alpha-3 chain isoform Tpm3.2cy                                         | 0.76 | 1.08 | 0.81 | 0.95 | 1.07E-02 | 6.56E-04 | 3.31E-02 | 4.41E-04 |
| NP_001741.4    | CAST     | calpastatin isoform a                                                              | 0.81 | 1.07 | 0.86 | 0.92 | 4.68E-03 | 1.30E-04 | 3.31E-02 | 2.55E-04 |
| NP_001099008.1 | MYBBP1A  | myb-binding protein 1A isoform 1                                                   | 1.08 | 0.95 | 1.03 | 1.02 | 8.06E-02 | 2.87E-02 | 7.96E-02 | 1.79E-02 |
| NP_001243731.1 | RPS3     | 40S ribosomal protein S3 isoform 1                                                 | 1.06 | 0.97 | 1.02 | 0.99 | 4.10E-02 | 8.97E-03 | 4.82E-02 | 4.35E-03 |
| NP_006657.1    | RUVBL2   | ruvB-like 2 isoform 1                                                              | 1.05 | 0.96 | 1.01 | 1.02 | 8.48E-02 | 3.11E-02 | 7.18E-02 | 1.43E-02 |
| NP_006182.2    | PA2G4    | proliferation-associated protein 2G4                                               | 1.10 | 0.97 | 1.07 | 1.03 | 4.23E-04 | 2.01E-06 | 2.60E-02 | 1.28E-04 |
| XP_024306305.1 | PRPF8    | pre-mRNA-processing-splicing factor 8 isoform X1                                   | 1.08 | 0.95 | 1.02 | 0.99 | 4.18E-02 | 9.31E-03 | 6.80E-02 | 1.23E-02 |
| NP_006817.1    | YWHAQ    | 14-3-3 protein theta                                                               | 1.03 | 1.02 | 1.05 | 0.99 | 1.05E-01 | 4.28E-02 | 5.43E-01 | 4.21E-01 |
| NP_003741.1    | EIF3A    | eukaryotic translation initiation factor 3 subunit A                               | 0.93 | 0.97 | 0.90 | 0.98 | 1.77E-01 | 9.25E-02 | 4.09E-01 | 2.80E-01 |
| NP_005262.1    | GLUD1    | glutamate dehydrogenase 1, mitochondrial isoform a precursor                       | 1.17 | 0.97 | 1.14 | 1.09 | 3.35E-04 | 9.16E-07 | 1.80E-02 | 5.97E-05 |
| NP_938149.2    | GANAB    | neutral alpha-glucosidase AB isoform 3 precursor                                   | 0.92 | 1.33 | 1.15 | 1.03 | 7.37E-01 | 6.53E-01 | 5.61E-01 | 4.40E-01 |
| XP_005250918.1 | PABPC1   | polyadenylate-binding protein 1 isoform X1                                         | 0.96 | 0.99 | 0.96 | 0.93 | 1.95E-01 | 1.06E-01 | 2.77E-01 | 1.57E-01 |
| XP_016883528.1 | YWHAH    | 14-3-3 protein beta/alpha isoform X1                                               | 0.91 | 1.04 | 0.94 | 0.92 | 1.06E-04 | 8.45E-08 | 3.45E-02 | 1.04E-03 |
| XP_006724052.1 | GART     | trifunctional purine biosynthetic protein adenosine-3 isoform X1                   | 1.05 | 0.99 | 1.04 | 1.02 | 1.06E-02 | 6.11E-04 | 3.53E-02 | 1.30E-03 |
| NP_004484.1    | HSD17B10 | 3-hydroxyacyl-CoA dehydrogenase type-2 isoform 1                                   | 1.07 | 0.98 | 1.05 | 1.03 | 1.46E-01 | 7.02E-02 | 1.26E-01 | 4.43E-02 |
| NP_003277.1    | TOP1     | DNA topoisomerase 1                                                                | 0.98 | 0.95 | 0.93 | 0.96 | 1.21E-01 | 5.36E-02 | 8.65E-02 | 2.17E-02 |
| NP_002005.1    | FKBP4    | peptidyl-prolyl cis-trans isomerase FKBP4                                          | 1.08 | 0.98 | 1.06 | 1.05 | 9.90E-02 | 3.90E-02 | 9.64E-02 | 2.75E-02 |
| NP_001351766.1 | MTHFD1   | C-1-tetrahydrofolate synthase, cytoplasmic isoform 2                               | 1.06 | 0.97 | 1.04 | 1.00 | 1.32E-01 | 6.04E-02 | 1.05E-01 | 3.21E-02 |
| NP_001351609.1 | TPM3     | tropomyosin alpha-3 chain isoform 11                                               | 0.75 | 1.11 | 0.84 | 0.93 | 1.03E-02 | 5.69E-04 | 3.31E-02 | 3.01E-04 |
| NP_001130002.1 | SERPINE2 | glia-derived nexin isoform c precursor                                             | 0.76 | 0.90 | 0.69 | 0.94 | 1.43E-02 | 1.19E-03 | 5.35E-02 | 6.51E-03 |
| NP_001184222.1 | DPYSL2   | dihydropyrimidinase-related protein 2 isoform 1                                    | 1.00 | 0.88 | 0.88 | 0.92 | 6.31E-02 | 1.96E-02 | 1.80E-02 | 3.83E-05 |
| NP_005313.1    | H1-5     | histone H1.5                                                                       | 0.82 | 1.08 | 0.88 | 0.86 | 3.85E-02 | 7.93E-03 | 4.87E-02 | 4.55E-03 |
| NP_001035908.1 | CAST     | calpastatin isoform i                                                              | 0.84 | 1.03 | 0.86 | 1.01 | 2.48E-01 | 1.47E-01 | 2.31E-01 | 1.18E-01 |

|                |          |                                                                                             |      |      |      |      |          |          |          |          |
|----------------|----------|---------------------------------------------------------------------------------------------|------|------|------|------|----------|----------|----------|----------|
| XP_005254109.1 | IPOS     | importin-5 isoform X1                                                                       | 1.07 | 0.95 | 1.02 | 0.98 | 6.82E-02 | 2.20E-02 | 6.01E-02 | 9.07E-03 |
| NP_055040.2    | PPP2R1A  | serine/threonine-protein phosphatase 2A 65 kDa regulatory subunit A alpha isoform isoform 1 | 1.01 | 0.98 | 0.99 | 1.00 | 4.94E-01 | 3.76E-01 | 2.15E-01 | 1.07E-01 |
| NP_003671.1    | YARS1    | tyrosine--tRNA ligase, cytoplasmic                                                          | 1.15 | 1.02 | 1.17 | 1.07 | 3.89E-02 | 8.19E-03 | 6.71E-02 | 1.19E-02 |
| NP_001129125.1 | PABPC4   | polyadenylate-binding protein 4 isoform 1                                                   | 1.02 | 0.98 | 1.00 | 0.98 | 3.30E-01 | 2.15E-01 | 1.63E-01 | 7.00E-02 |
| NP_057535.1    | COPB1    | coatomer subunit beta                                                                       | 1.01 | 0.94 | 0.95 | 0.99 | 1.03E-01 | 4.15E-02 | 8.29E-02 | 1.97E-02 |
| NP_001091974.1 | DDX17    | probable ATP-dependent RNA helicase DDX17 isoform 3                                         | 1.05 | 0.95 | 1.00 | 1.04 | 9.65E-02 | 3.75E-02 | 6.66E-02 | 1.17E-02 |
| NP_002100.2    | HARS1    | histidine--tRNA ligase, cytoplasmic isoform 1                                               | 1.10 | 0.98 | 1.08 | 1.03 | 5.25E-02 | 1.45E-02 | 6.34E-02 | 1.02E-02 |
| NP_000958.1    | RPL3     | 60S ribosomal protein L3 isoform a                                                          | 1.09 | 0.94 | 1.03 | 0.97 | 3.19E-02 | 5.59E-03 | 4.27E-02 | 2.65E-03 |
| NP_002620.1    | PGAM1    | phosphoglycerate mutase 1 isoform 1                                                         | 0.99 | 1.08 | 1.07 | 1.04 | 2.61E-01 | 1.58E-01 | 4.43E-02 | 3.21E-03 |
| NP_001029249.1 | H4C15    | histone H4                                                                                  | 1.05 | 0.90 | 0.95 | 0.91 | 2.77E-01 | 1.73E-01 | 9.04E-02 | 2.44E-02 |
| NP_001276718.1 | GPI      | glucose-6-phosphate isomerase isoform 3                                                     | 1.04 | 1.03 | 1.07 | 1.02 | 2.28E-02 | 2.98E-03 | 3.01E-01 | 1.78E-01 |
| NP_001484.1    | GDI1     | rab GDP dissociation inhibitor alpha                                                        | 1.14 | 1.01 | 1.15 | 1.04 | 8.42E-02 | 3.06E-02 | 1.12E-01 | 3.56E-02 |
| NP_005013.1    | PFN1     | profilin-1 isoform 2                                                                        | 1.12 | 0.90 | 1.01 | 1.02 | 1.08E-01 | 4.46E-02 | 8.00E-02 | 1.81E-02 |
| NP_055227.1    | CACYBP   | calyculin-binding protein isoform 1                                                         | 1.06 | 1.03 | 1.09 | 1.02 | 1.46E-01 | 7.02E-02 | 3.83E-01 | 2.54E-01 |
| NP_002795.2    | PSMC3    | 26S proteasome regulatory subunit 6A                                                        | 1.07 | 0.96 | 1.03 | 0.99 | 2.55E-02 | 3.66E-03 | 5.18E-02 | 5.64E-03 |
| NP_003281.1    | TPM4     | tropomyosin alpha-4 chain isoform Tpm4.2cy                                                  | 0.76 | 1.08 | 0.82 | 0.93 | 1.68E-03 | 1.92E-05 | 3.31E-02 | 2.97E-04 |
| XP_011532966.1 | CANX     | calnexin isoform X3                                                                         | 1.09 | 1.05 | 1.15 | 0.97 | 1.46E-02 | 1.25E-03 | 8.25E-02 | 1.95E-02 |
| NP_000963.1    | RPL7A    | 60S ribosomal protein L7a                                                                   | 0.98 | 1.07 | 1.05 | 0.94 | 5.19E-01 | 4.04E-01 | 1.63E-01 | 6.95E-02 |
| NP_000933.1    | PPIB     | peptidyl-prolyl cis-trans isomerase B precursor                                             | 1.07 | 1.00 | 1.07 | 1.02 | 2.35E-01 | 1.36E-01 | 2.74E-01 | 1.54E-01 |
| NP_001346945.1 | G6PD     | glucose-6-phosphate 1-dehydrogenase isoform b                                               | 1.16 | 1.01 | 1.17 | 1.12 | 1.42E-02 | 1.15E-03 | 3.69E-02 | 1.94E-03 |
| NP_000117.1    | ETFFA    | electron transfer flavoprotein subunit alpha, mitochondrial isoform a                       | 1.12 | 0.98 | 1.09 | 1.05 | 8.30E-03 | 3.79E-04 | 5.53E-02 | 1.28E-03 |
| NP_001395.1    | EEFIG    | elongation factor 1-gamma                                                                   | 1.11 | 0.98 | 1.08 | 1.00 | 4.24E-02 | 9.61E-03 | 5.35E-02 | 6.49E-03 |
| XP_024308601.1 | HDLBP    | vigilin isoform X1                                                                          | 0.91 | 1.01 | 0.92 | 0.97 | 2.02E-02 | 2.39E-03 | 7.18E-02 | 1.42E-02 |
| XP_005263481.1 | PARK7    | protein/nucleic acid deglycase DJ-1 isoform X1                                              | 0.97 | 1.01 | 0.97 | 1.04 | 5.14E-02 | 1.39E-02 | 8.90E-02 | 2.33E-02 |
| NP_006383.2    | NOP56    | nucleolar protein 56                                                                        | 1.11 | 0.96 | 1.07 | 1.04 | 6.92E-02 | 2.24E-02 | 6.86E-02 | 1.26E-02 |
| NP_054706.1    | VCL      | vinculin isoform meta-VCL                                                                   | 1.05 | 1.01 | 1.06 | 1.08 | 9.80E-02 | 3.83E-02 | 1.51E-01 | 6.11E-02 |
| NP_057212.1    | COG1     | coatomer subunit gamma-1                                                                    | 1.01 | 0.97 | 0.97 | 1.01 | 1.85E-01 | 9.79E-02 | 1.84E-01 | 8.46E-02 |
| XP_011539528.1 | PHGDH    | D-3-phosphoglycerate dehydrogenase isoform X1                                               | 1.13 | 1.08 | 1.23 | 1.05 | 5.65E-02 | 1.63E-02 | 2.14E-01 | 1.05E-01 |
| NP_000960.2    | RPL5     | 60S ribosomal protein L5                                                                    | 1.08 | 1.00 | 1.08 | 0.99 | 8.42E-02 | 3.06E-02 | 1.14E-01 | 3.70E-02 |
| NP_002854.3    | PYGL     | glycogen phosphorylase, liver form isoform 1                                                | 1.02 | 0.99 | 1.01 | 1.05 | 4.69E-01 | 3.52E-01 | 4.73E-01 | 3.45E-01 |
| NP_000997.1    | RPS3A    | 40S ribosomal protein S3a isoform 1                                                         | 1.10 | 0.97 | 1.06 | 1.03 | 6.97E-02 | 2.26E-02 | 7.88E-02 | 1.74E-02 |
| NP_001303701.1 | GARS1    | glycine--tRNA ligase isoform 2                                                              | 1.15 | 1.04 | 1.20 | 1.07 | 6.23E-03 | 2.22E-04 | 9.37E-02 | 2.62E-02 |
| NP_000998.1    | RPS4X    | 40S ribosomal protein S4, X isoform                                                         | 1.08 | 0.96 | 1.04 | 0.96 | 8.16E-02 | 2.94E-02 | 7.04E-02 | 1.36E-02 |
| NP_066953.1    | PPIA     | peptidyl-prolyl cis-trans isomerase A isoform 1                                             | 1.00 | 1.02 | 1.03 | 1.05 | 7.87E-01 | 7.12E-01 | 4.62E-01 | 3.34E-01 |
| XP_011543629.1 | SERPINH1 | serpin H1 isoform X1                                                                        | 0.98 | 0.96 | 0.94 | 1.00 | 5.45E-01 | 4.31E-01 | 4.41E-01 | 3.13E-01 |
| NP_038203.2    | IARS1    | isoleucine--tRNA ligase, cytoplasmic isoform 1                                              | 1.10 | 0.95 | 1.05 | 1.04 | 4.21E-02 | 9.45E-03 | 5.00E-02 | 5.06E-03 |
| NP_005808.3    | PLIN3    | perilipin-3 isoform 1                                                                       | 0.95 | 1.01 | 0.95 | 0.92 | 5.09E-02 | 1.36E-02 | 9.82E-02 | 2.84E-02 |
| XP_011526432.1 | PRKCSH   | glucosidase 2 subunit beta isoform X1                                                       | 0.90 | 1.05 | 0.95 | 0.91 | 5.14E-02 | 1.39E-02 | 5.35E-02 | 6.46E-03 |
| NP_001128512.1 | DCTN1    | dynactin subunit 1 isoform 3                                                                | 1.02 | 1.05 | 1.07 | 1.04 | 5.23E-01 | 4.09E-01 | 3.88E-01 | 2.59E-01 |
| NP_000174.1    | HADHB    | trifunctional enzyme subunit beta, mitochondrial isoform 1 precursor                        | 1.00 | 1.01 | 1.01 | 1.02 | 5.87E-01 | 4.78E-01 | 8.28E-01 | 7.59E-01 |
| NP_005539.1    | KARS1    | lysine--tRNA ligase isoform 2                                                               | 1.04 | 1.00 | 1.04 | 1.03 | 7.57E-03 | 3.22E-04 | 1.36E-01 | 5.10E-02 |
| NP_000134.2    | FH       | fumarate hydratase, mitochondrial                                                           | 1.07 | 1.02 | 1.10 | 1.05 | 1.01E-01 | 4.06E-02 | 2.16E-01 | 1.07E-01 |
| NP_037506.2    | PDCD6IP  | programmed cell death 6-interacting protein isoform 1                                       | 1.07 | 0.99 | 1.06 | 1.02 | 3.19E-02 | 5.49E-03 | 6.58E-02 | 1.10E-02 |
| NP_005403.2    | SHMT2    | serine hydroxymethyltransferase, mitochondrial isoform 1 precursor                          | 1.14 | 0.98 | 1.12 | 1.04 | 2.34E-02 | 3.13E-03 | 4.59E-02 | 3.82E-03 |
| NP_001018077.1 | SERBP1   | plasminogen activator inhibitor 1 RNA-binding protein isoform 1                             | 0.85 | 1.05 | 0.90 | 0.92 | 2.69E-03 | 4.83E-05 | 3.31E-02 | 3.53E-04 |
| NP_001268425.1 | PHB      | prohibitin isoform 1                                                                        | 1.11 | 0.98 | 1.08 | 1.02 | 8.82E-03 | 4.22E-04 | 3.31E-02 | 3.43E-04 |
| NP_001269633.1 | PDIA6    | protein disulfide-isomerase A6 isoform a                                                    | 1.01 | 1.12 | 1.13 | 1.01 | 5.40E-01 | 4.26E-01 | 6.56E-02 | 1.10E-02 |

|                |                |                                                                             |      |      |      |      |          |          |          |          |
|----------------|----------------|-----------------------------------------------------------------------------|------|------|------|------|----------|----------|----------|----------|
| NP_001189360.1 | PRDX1          | peroxiredoxin-1                                                             | 1.12 | 0.97 | 1.09 | 1.07 | 1.44E-02 | 1.22E-03 | 3.38E-02 | 8.45E-04 |
| NP_004485.1    | HDFGF          | hepatoma-derived growth factor isoform a                                    | 0.78 | 1.03 | 0.81 | 0.86 | 1.48E-02 | 1.31E-03 | 3.49E-02 | 1.11E-03 |
| NP_036611.2    | YWHAH          | 14-3-3 protein gamma                                                        | 1.09 | 0.92 | 1.00 | 1.02 | 7.46E-02 | 2.53E-02 | 5.77E-02 | 7.85E-03 |
| NP_006286.1    | VARS           | valine--tRNA ligase                                                         | 1.10 | 0.98 | 1.07 | 1.05 | 7.06E-03 | 2.83E-04 | 8.38E-02 | 2.01E-02 |
| NP_003899.2    | EIF2S2         | eukaryotic translation initiation factor 2 subunit 2 isoform 1              | 1.05 | 1.00 | 1.05 | 1.03 | 2.12E-02 | 2.65E-03 | 9.04E-02 | 2.43E-02 |
| NP_002806.2    | PSMD11         | 26S proteasome non-ATPase regulatory subunit 11                             | 1.07 | 0.99 | 1.05 | 1.04 | 1.29E-02 | 9.51E-04 | 6.85E-02 | 1.26E-02 |
| NP_031389.3    | NONO           | non-POU domain-containing octamer-binding protein isoform 1                 | 0.99 | 0.93 | 0.92 | 1.00 | 6.27E-01 | 5.22E-01 | 1.54E-01 | 6.25E-02 |
| NP_000993.1    | RPLP0          | 60S acidic ribosomal protein P0                                             | 1.09 | 0.95 | 1.03 | 1.01 | 5.39E-03 | 1.75E-04 | 3.31E-02 | 5.74E-04 |
| NP_004332.2    | CAD            | CAD protein isoform 1                                                       | 1.12 | 0.97 | 1.09 | 1.04 | 3.82E-02 | 7.84E-03 | 5.01E-02 | 5.15E-03 |
| NP_002442.2    | MTAP           | S-methyl-5'-thioadenosine phosphorylase                                     | 1.06 | 0.96 | 1.02 | 1.03 | 1.01E-02 | 5.36E-04 | 5.34E-02 | 6.29E-03 |
| NP_002810.1    | PTBP1          | polypyrimidine tract-binding protein 1 isoform a                            | 0.89 | 1.13 | 1.00 | 0.88 | 8.16E-03 | 3.69E-04 | 3.38E-02 | 8.33E-04 |
| NP_002769.1    | PSAP           | prosaposin isoform a                                                        | 0.60 | 1.02 | 0.61 | 0.90 | 4.23E-04 | 1.77E-06 | 1.80E-02 | 3.96E-05 |
| NP_036565.2    | SF3B1          | splicing factor 3B subunit 1 isoform 1                                      | 1.06 | 0.98 | 1.04 | 1.05 | 1.38E-01 | 6.45E-02 | 1.15E-01 | 3.72E-02 |
| NP_001307.2    | CSEIL          | exportin-2 isoform 1                                                        | 1.05 | 0.97 | 1.02 | 1.00 | 2.35E-01 | 1.36E-01 | 1.72E-01 | 7.61E-02 |
| XP_005271170.1 | SFPQ           | splicing factor, proline- and glutamine-rich isoform X1                     | 0.88 | 0.98 | 0.87 | 0.93 | 2.32E-02 | 3.07E-03 | 5.12E-02 | 5.50E-03 |
| NP_001073027.1 | HNRNPUL2       | heterogeneous nuclear ribonucleoprotein U-like protein 2                    | 1.05 | 0.95 | 1.00 | 1.06 | 9.88E-02 | 3.89E-02 | 8.12E-02 | 1.89E-02 |
| NP_038470.1    | STOML2         | stomatin-like protein 2, mitochondrial isoform a                            | 1.17 | 0.97 | 1.14 | 1.09 | 2.99E-02 | 4.90E-03 | 7.20E-02 | 1.45E-02 |
| NP_000975.2    | RPL23A         | 60S ribosomal protein L23a                                                  | 0.82 | 1.05 | 0.87 | 0.90 | 3.19E-02 | 5.49E-03 | 4.96E-02 | 4.73E-03 |
| NP_001485.2    | GDI2           | rab GDP dissociation inhibitor beta isoform 1                               | 1.08 | 0.98 | 1.05 | 1.00 | 3.04E-01 | 1.94E-01 | 2.46E-01 | 1.31E-01 |
| NP_060979.2    | LRRCS9         | leucine-rich repeat-containing protein 59                                   | 1.13 | 1.05 | 1.19 | 1.05 | 1.36E-02 | 1.06E-03 | 1.01E-01 | 2.99E-02 |
| XP_005253518.1 | RECQL          | ATP-dependent DNA helicase Q1 isoform X1                                    | 1.12 | 0.91 | 1.02 | 1.02 | 2.16E-02 | 2.72E-03 | 3.64E-02 | 1.86E-03 |
| NP_002793.2    | PSMC1          | 26S proteasome regulatory subunit 4 isoform a                               | 1.10 | 0.99 | 1.09 | 1.04 | 1.51E-02 | 1.39E-03 | 5.40E-02 | 6.76E-03 |
| NP_005490.1    | UBA2           | SUMO-activating enzyme subunit 2                                            | 1.08 | 0.95 | 1.02 | 1.05 | 1.71E-03 | 2.13E-05 | 3.31E-02 | 4.03E-04 |
| XP_024307077.1 | TRIM28         | transcription intermediary factor 1-beta isoform X1                         | 0.93 | 0.91 | 0.84 | 0.97 | 3.05E-02 | 5.07E-03 | 3.29E-01 | 2.04E-01 |
| NP_004506.2    | ILF2           | interleukin enhancer-binding factor 2 isoform 1                             | 1.04 | 0.95 | 0.99 | 1.01 | 2.17E-01 | 1.22E-01 | 1.32E-01 | 4.86E-02 |
| NP_001132929.1 | BCAP31         | B-cell receptor-associated protein 31 isoform a                             | 1.11 | 1.06 | 1.18 | 1.04 | 3.98E-02 | 8.54E-03 | 1.30E-01 | 4.71E-02 |
| NP_004896.1    | PRDX6          | peroxiredoxin-6                                                             | 1.00 | 0.98 | 0.98 | 0.98 | 8.52E-01 | 7.92E-01 | 4.73E-01 | 3.45E-01 |
| NP_036450.1    | LETM1          | mitochondrial proton/calcium exchanger protein precursor                    | 1.12 | 0.98 | 1.09 | 1.04 | 3.64E-02 | 7.18E-03 | 5.20E-02 | 5.89E-03 |
| NP_005042.1    | QARS1          | glutamine--tRNA ligase isoform a                                            | 1.09 | 0.97 | 1.05 | 1.03 | 1.39E-01 | 6.52E-02 | 1.81E-01 | 8.31E-02 |
| NP_001646.2    | ARCN1          | coatomer subunit delta isoform 1                                            | 1.05 | 0.93 | 0.97 | 1.01 | 1.28E-02 | 9.39E-04 | 4.50E-02 | 3.53E-03 |
| XP_016859290.1 | GFPT1          | glutamine--fructose-6-phosphate aminotransferase [isomerizing] 1 isoform X1 | 1.08 | 0.97 | 1.04 | 1.06 | 2.76E-02 | 4.23E-03 | 3.80E-02 | 2.16E-03 |
| NP_001290453.1 | TUBB6          | tubulin beta-6 chain isoform 1                                              | 0.95 | 0.98 | 0.92 | 0.98 | 3.39E-02 | 6.30E-03 | 1.70E-01 | 7.40E-02 |
| XP_024303862.1 | ALDH18A1       | delta-1-pyrroline-5-carboxylate synthase isoform X1                         | 0.97 | 0.95 | 0.92 | 1.06 | 1.06E-01 | 4.35E-02 | 3.38E-01 | 2.11E-01 |
| NP_001186284.1 | RPL17-C18orf32 | RPL17-C18orf32 protein isoform 1                                            | 0.95 | 1.00 | 0.95 | 0.93 | 1.54E-01 | 7.55E-02 | 1.59E-01 | 6.67E-02 |
| XP_005270945.1 | NASP           | nuclear autoantigenic sperm protein isoform X1                              | 0.77 | 1.05 | 0.81 | 0.85 | 7.57E-03 | 3.18E-04 | 3.45E-02 | 9.88E-04 |
| XP_005274089.1 | PC             | pyruvate carboxylase, mitochondrial isoform X1                              | 1.10 | 0.97 | 1.06 | 1.11 | 1.57E-01 | 7.75E-02 | 1.30E-01 | 4.71E-02 |
| NP_000995.1    | RPLP2          | 60S acidic ribosomal protein P2                                             | 0.84 | 1.03 | 0.87 | 0.92 | 2.34E-02 | 3.14E-03 | 4.43E-02 | 3.14E-03 |
| NP_001349.2    | DHX15          | pre-mRNA-splicing factor ATP-dependent RNA helicase DHX15                   | 1.09 | 0.93 | 1.02 | 1.01 | 4.23E-04 | 1.51E-06 | 3.30E-02 | 2.45E-04 |
| XP_024306400.1 | EIF5A          | eukaryotic translation initiation factor 5A-1 isoform X3                    | 0.94 | 1.00 | 0.94 | 1.04 | 2.86E-02 | 4.51E-03 | 4.86E-02 | 4.46E-03 |
| NP_001310913.1 | CTNNA1         | catenin alpha-1 isoform 1                                                   | 0.99 | 1.00 | 0.99 | 1.03 | 3.69E-01 | 2.52E-01 | 5.22E-01 | 3.98E-01 |
| NP_001287750.1 | EIF4B          | eukaryotic translation initiation factor 4B isoform 1                       | 0.77 | 1.05 | 0.81 | 0.89 | 4.12E-03 | 1.03E-04 | 3.36E-02 | 6.35E-04 |
| NP_006833.2    | SF3B2          | splicing factor 3B subunit 2                                                | 0.92 | 1.00 | 0.92 | 1.00 | 2.93E-02 | 4.76E-03 | 5.00E-02 | 4.99E-03 |
| NP_001265393.1 | DNM1L          | dynammin-1-like protein isoform 5                                           | 1.11 | 0.90 | 0.99 | 1.02 | 3.74E-01 | 2.56E-01 | 2.62E-01 | 1.44E-01 |
| NP_001002.1    | RPS7           | 40S ribosomal protein S7                                                    | 1.01 | 1.02 | 1.03 | 0.98 | 4.88E-02 | 1.25E-02 | 3.12E-01 | 1.88E-01 |
| NP_004490.2    | HNRNPAB        | heterogeneous nuclear ribonucleoprotein A/B isoform b                       | 0.82 | 1.02 | 0.84 | 0.86 | 2.84E-02 | 4.42E-03 | 5.20E-02 | 5.89E-03 |
| XP_024307247.1 | HNRNPL         | heterogeneous nuclear ribonucleoprotein L isoform X1                        | 1.10 | 0.94 | 1.03 | 1.00 | 1.10E-01 | 4.62E-02 | 8.65E-02 | 2.17E-02 |



|                |           |                                                                  |      |      |      |      |          |          |          |          |
|----------------|-----------|------------------------------------------------------------------|------|------|------|------|----------|----------|----------|----------|
| NP_002796.4    | PSMC5     | 26S proteasome regulatory subunit 8 isoform 1                    | 1.10 | 0.96 | 1.06 | 1.05 | 1.07E-02 | 6.55E-04 | 6.66E-02 | 1.17E-02 |
| NP_613258.2    | MACROH2A1 | core histone macro-H2A.1 isoform 3                               | 1.07 | 0.99 | 1.06 | 0.99 | 3.80E-02 | 7.76E-03 | 7.38E-02 | 1.53E-02 |
| NP_005554.1    | STMN1     | stathmin isoform a                                               | 0.82 | 1.09 | 0.89 | 0.89 | 9.76E-03 | 5.11E-04 | 3.31E-02 | 3.13E-04 |
| NP_006391.1    | DCTN2     | dynactin subunit 2 isoform 1                                     | 0.90 | 1.06 | 0.96 | 0.98 | 4.18E-02 | 9.33E-03 | 5.00E-02 | 5.06E-03 |
| NP_002798.2    | PSMD1     | 26S proteasome non-ATPase regulatory subunit 1 isoform 1         | 1.08 | 0.99 | 1.07 | 1.01 | 2.55E-02 | 3.61E-03 | 4.35E-02 | 2.93E-03 |
| NP_003079.1    | FSCN1     | fascin                                                           | 1.12 | 0.96 | 1.07 | 0.99 | 1.61E-02 | 1.57E-03 | 6.52E-02 | 1.08E-02 |
| NP_006297.2    | SMC1A     | structural maintenance of chromosomes protein 1A isoform 1       | 1.03 | 0.97 | 1.00 | 0.99 | 2.89E-03 | 6.14E-05 | 4.07E-02 | 2.42E-03 |
| XP_011511565.1 | GMPS      | GMP synthase [glutamine-hydrolyzing] isoform X1                  | 1.03 | 0.98 | 1.01 | 0.99 | 1.27E-02 | 9.20E-04 | 7.21E-02 | 1.46E-02 |
| NP_001008938.1 | CKAP5     | cytoskeleton-associated protein 5 isoform a                      | 1.03 | 1.01 | 1.04 | 0.97 | 1.30E-01 | 5.91E-02 | 4.07E-01 | 2.78E-01 |
| XP_011522642.1 | CNP       | 2',3'-cyclic-nucleotide 3'-phosphodiesterase isoform X1          | 1.06 | 0.97 | 1.03 | 1.05 | 4.24E-02 | 9.67E-03 | 5.11E-02 | 5.46E-03 |
| NP_976317.1    | RNH1      | ribonuclease inhibitor                                           | 1.05 | 0.99 | 1.04 | 1.05 | 5.39E-03 | 1.69E-04 | 3.31E-02 | 3.65E-04 |
| NP_998839.1    | TPM2      | tropomyosin beta chain isoform Tpm2.1sm/cy                       | 0.74 | 1.11 | 0.83 | 0.93 | 9.54E-02 | 3.67E-02 | 8.47E-02 | 2.09E-02 |
| XP_016865310.1 | VDAC1     | voltage-dependent anion-selective channel protein 1 isoform X1   | 1.16 | 0.91 | 1.06 | 1.06 | 7.02E-02 | 2.29E-02 | 6.06E-02 | 9.29E-03 |
| NP_005737.1    | NAMPT     | nicotinamide phosphoribosyltransferase precursor                 | 1.14 | 0.98 | 1.12 | 1.04 | 2.55E-02 | 3.63E-03 | 5.34E-02 | 6.26E-03 |
| XP_016855584.1 | NUDC      | nuclear migration protein nudC isoform X2                        | 1.04 | 0.98 | 1.02 | 1.02 | 2.60E-02 | 3.81E-03 | 3.79E-02 | 2.09E-03 |
| NP_001074419.1 | MYO1C     | unconventional myosin-Ic isoform b                               | 1.06 | 1.04 | 1.10 | 1.05 | 2.24E-01 | 1.28E-01 | 8.22E-01 | 7.50E-01 |
| NP_001354876.1 | TPP2      | tripeptidyl-peptidase 2 isoform 3                                | 1.07 | 1.00 | 1.07 | 1.07 | 4.91E-02 | 1.26E-02 | 9.33E-02 | 2.59E-02 |
| NP_008878.3    | SRP72     | signal recognition particle subunit SRP72 isoform 1              | 1.15 | 0.99 | 1.14 | 1.06 | 2.38E-02 | 3.23E-03 | 6.20E-02 | 9.82E-03 |
| NP_001345445.1 | PRDX5     | peroxiredoxin-5, mitochondrial isoform S                         | 0.92 | 1.05 | 0.97 | 1.03 | 8.10E-02 | 2.91E-02 | 7.18E-02 | 1.42E-02 |
| NP_001138303.1 | PHB2      | prohibitin-2 isoform 1                                           | 1.12 | 0.97 | 1.09 | 1.04 | 1.06E-02 | 6.21E-04 | 3.31E-02 | 4.82E-04 |
| NP_112738.1    | HNRNPD    | heterogeneous nuclear ribonucleoprotein D0 isoform a             | 0.87 | 1.02 | 0.89 | 0.90 | 5.22E-02 | 1.43E-02 | 6.85E-02 | 1.25E-02 |
| NP_000405.1    | HSD17B4   | peroxisomal multifunctional enzyme type 2 isoform 2              | 1.13 | 0.97 | 1.09 | 1.03 | 5.80E-02 | 1.72E-02 | 7.06E-02 | 1.36E-02 |
| NP_001949.1    | EEF1A2    | elongation factor 1-alpha 2                                      | 1.07 | 1.11 | 1.18 | 1.20 | 1.65E-02 | 1.64E-03 | 1.96E-01 | 9.35E-02 |
| NP_005156.1    | ALDOC     | fructose-bisphosphate aldolase C                                 | 1.06 | 1.10 | 1.16 | 1.20 | 9.13E-04 | 7.04E-06 | 6.08E-02 | 9.41E-03 |
| NP_001354.1    | DKC1      | H/ACA ribonucleoprotein complex subunit DKC1 isoform 1           | 1.08 | 0.95 | 1.03 | 1.01 | 9.81E-02 | 3.84E-02 | 8.25E-02 | 1.95E-02 |
| NP_001264153.1 | TAGLN2    | transgelin-2 isoform a                                           | 1.07 | 1.02 | 1.08 | 1.03 | 9.39E-02 | 3.60E-02 | 1.55E-01 | 6.40E-02 |
| XP_011526959.2 | AHCY      | adenosylhomocysteinase isoform X1                                | 1.06 | 0.98 | 1.04 | 0.99 | 6.46E-02 | 2.03E-02 | 7.20E-02 | 1.44E-02 |
| NP_112737.1    | HNRNPD    | heterogeneous nuclear ribonucleoprotein D0 isoform b             | 0.88 | 1.05 | 0.92 | 0.86 | 4.59E-02 | 1.11E-02 | 9.41E-02 | 2.64E-02 |
| NP_116126.3    | LMNB2     | lamin-B2                                                         | 1.09 | 0.96 | 1.05 | 1.04 | 6.60E-02 | 2.09E-02 | 8.90E-02 | 2.34E-02 |
| NP_001269315.1 | IDH1      | isocitrate dehydrogenase [NADP] cytoplasmic                      | 1.12 | 1.01 | 1.12 | 1.04 | 1.83E-02 | 1.99E-03 | 6.73E-02 | 1.20E-02 |
| XP_024310152.1 | DIAPH1    | protein diaphanous homolog 1 isoform X1                          | 1.08 | 0.96 | 1.04 | 1.01 | 3.00E-02 | 4.94E-03 | 4.07E-02 | 2.42E-03 |
| NP_001173.2    | ALDH7A1   | alpha-aminoadipic semialdehyde dehydrogenase isoform 1 precursor | 1.04 | 1.01 | 1.05 | 1.01 | 3.38E-01 | 2.22E-01 | 4.36E-01 | 3.08E-01 |
| NP_150091.2    | PSIP1     | PC4 and SFRS1-interacting protein isoform 2                      | 0.88 | 1.03 | 0.90 | 0.98 | 4.02E-02 | 8.70E-03 | 5.31E-02 | 6.12E-03 |
| NP_001914.3    | DDB1      | DNA damage-binding protein 1                                     | 1.04 | 0.97 | 1.02 | 1.04 | 3.49E-02 | 6.64E-03 | 2.04E-01 | 9.96E-02 |
| NP_002794.1    | PSMC2     | 26S proteasome regulatory subunit 7 isoform 1                    | 1.11 | 0.98 | 1.09 | 1.05 | 4.32E-02 | 9.93E-03 | 5.64E-02 | 7.44E-03 |
| NP_001307524.1 | DDX5      | probable ATP-dependent RNA helicase DDX5 isoform a               | 0.93 | 0.94 | 0.88 | 0.97 | 1.03E-02 | 5.70E-04 | 1.84E-01 | 8.55E-02 |
| NP_055121.1    | RTCB      | tRNA-splicing ligase RtcB homolog                                | 1.13 | 0.99 | 1.11 | 1.05 | 3.41E-02 | 6.42E-03 | 6.65E-02 | 1.15E-02 |
| NP_036558.3    | SF3B3     | splicing factor 3B subunit 3                                     | 1.05 | 0.93 | 0.97 | 1.01 | 7.39E-02 | 2.48E-02 | 8.12E-02 | 1.89E-02 |
| NP_057018.1    | NOP58     | nucleolar protein 58                                             | 1.11 | 0.97 | 1.07 | 1.04 | 3.68E-02 | 7.34E-03 | 7.21E-02 | 1.48E-02 |
| NP_001171725.1 | ESYT1     | extended synaptotagmin-1 isoform 1                               | 1.12 | 0.96 | 1.07 | 1.01 | 6.12E-03 | 2.13E-04 | 7.83E-02 | 1.69E-02 |
| NP_001186040.1 | MDH1      | malate dehydrogenase, cytoplasmic isoform 2                      | 1.02 | 1.05 | 1.07 | 0.96 | 7.68E-01 | 6.89E-01 | 5.78E-01 | 4.62E-01 |
| NP_005712.1    | ACTR3     | actin-related protein 3 isoform 1                                | 1.06 | 1.01 | 1.07 | 1.03 | 1.94E-03 | 2.59E-05 | 5.35E-02 | 6.47E-03 |
| NP_004238.3    | EFTUD2    | 116 kDa U5 small nuclear ribonucleoprotein component isoform a   | 1.02 | 0.99 | 1.01 | 1.01 | 5.32E-01 | 4.17E-01 | 4.62E-01 | 3.34E-01 |
| XP_011513391.1 | IGF2BP3   | insulin-like growth factor 2 mRNA-binding protein 3 isoform X1   | 1.06 | 1.00 | 1.06 | 1.03 | 1.26E-01 | 5.69E-02 | 1.41E-01 | 5.43E-02 |
| NP_683877.1    | PSMA1     | proteasome subunit alpha type-1 isoform 1                        | 1.10 | 1.00 | 1.10 | 1.06 | 9.04E-03 | 4.47E-04 | 4.97E-02 | 4.75E-03 |
| NP_004199.1    | AIFM1     | apoptosis-inducing factor 1, mitochondrial isoform AIF precursor | 1.15 | 0.97 | 1.11 | 1.07 | 1.83E-02 | 2.00E-03 | 3.53E-02 | 1.40E-03 |
| NP_009035.3    | RPL10A    | 60S ribosomal protein L10a                                       | 1.09 | 1.03 | 1.13 | 1.03 | 5.24E-02 | 1.44E-02 | 1.27E-01 | 4.56E-02 |

|                |           |                                                                                              |      |      |      |      |          |          |          |          |
|----------------|-----------|----------------------------------------------------------------------------------------------|------|------|------|------|----------|----------|----------|----------|
| XP_011535408.1 | SRP54     | signal recognition particle 54 kDa protein isoform X1                                        | 1.12 | 1.01 | 1.14 | 1.05 | 1.32E-01 | 6.02E-02 | 2.25E-01 | 1.14E-01 |
| NP_001311233.1 | RPN2      | dolichyl-diphosphooligosaccharide--protein glycosyltransferase subunit 2 isoform 7 precursor | 1.07 | 0.94 | 1.01 | 1.00 | 3.55E-01 | 2.38E-01 | 2.19E-01 | 1.09E-01 |
| XP_005252522.1 | PFKP      | ATP-dependent 6-phosphofructokinase, platelet type isoform X1                                | 1.11 | 0.99 | 1.10 | 1.04 | 5.82E-02 | 1.73E-02 | 9.33E-02 | 2.59E-02 |
| XP_024303687.1 | RRP12     | RRP12-like protein isoform X1                                                                | 1.00 | 1.00 | 1.01 | 1.02 | 4.30E-01 | 3.10E-01 | 9.07E-01 | 8.64E-01 |
| XP_024305442.1 | ADAR      | double-stranded RNA-specific adenosine deaminase isoform X1                                  | 1.09 | 0.97 | 1.05 | 1.03 | 1.60E-01 | 8.03E-02 | 1.25E-01 | 4.39E-02 |
| NP_001129497.1 | PLS3      | plastin-3 isoform 1                                                                          | 0.98 | 0.97 | 0.95 | 0.93 | 4.48E-01 | 3.28E-01 | 9.22E-01 | 8.89E-01 |
| NP_001340.2    | DARS1     | aspartate--tRNA ligase, cytoplasmic isoform 1                                                | 1.07 | 0.96 | 1.03 | 1.07 | 4.59E-02 | 1.11E-02 | 5.00E-02 | 4.97E-03 |
| NP_001007.2    | RPS12     | 40S ribosomal protein S12                                                                    | 0.96 | 0.98 | 0.94 | 1.04 | 1.48E-01 | 7.16E-02 | 3.53E-01 | 2.25E-01 |
| XP_016864782.1 | NNT       | NAD(P) transhydrogenase, mitochondrial isoform X1                                            | 1.09 | 0.97 | 1.05 | 1.04 | 1.09E-02 | 6.72E-04 | 3.53E-02 | 1.52E-03 |
| NP_003133.1    | SSB       | lupus La protein                                                                             | 0.80 | 1.07 | 0.85 | 0.88 | 2.64E-02 | 3.91E-03 | 4.32E-02 | 2.80E-03 |
| NP_006187.2    | PCBP1     | poly(rC)-binding protein 1                                                                   | 0.97 | 0.98 | 0.95 | 0.94 | 3.51E-01 | 2.34E-01 | 7.86E-01 | 7.06E-01 |
| NP_002215.2    | ITPR3     | inositol 1,4,5-trisphosphate receptor type 3                                                 | 1.05 | 0.99 | 1.05 | 1.04 | 1.06E-02 | 6.04E-04 | 4.86E-02 | 4.46E-03 |
| NP_006254.1    | PSME1     | proteasome activator complex subunit 1 isoform 1                                             | 1.03 | 0.98 | 1.01 | 0.97 | 1.44E-01 | 6.86E-02 | 9.76E-02 | 2.80E-02 |
| NP_001186092.1 | PSMC5     | 26S proteasome regulatory subunit 8 isoform 2                                                | 1.33 | 1.08 | 1.41 | 1.49 | 3.76E-01 | 2.58E-01 | 5.68E-01 | 4.51E-01 |
| NP_001245238.1 | NOP2      | probable 28S rRNA (cytosine(4447)-C(5))-methyltransferase isoform 3                          | 1.04 | 1.04 | 1.08 | 1.06 | 7.24E-03 | 2.96E-04 | 7.86E-01 | 7.06E-01 |
| XP_011531399.1 | XPO1      | exportin-1 isoform X1                                                                        | 1.16 | 0.88 | 1.01 | 1.00 | 1.28E-03 | 1.18E-05 | 2.60E-02 | 1.18E-04 |
| NP_006301.3    | NPEPPS    | puromycin-sensitive aminopeptidase isoform 1                                                 | 1.10 | 0.96 | 1.06 | 1.06 | 6.80E-03 | 2.69E-04 | 3.38E-02 | 7.67E-04 |
| NP_002130.2    | RBMX      | RNA-binding motif protein, X chromosome isoform 1                                            | 0.86 | 1.02 | 0.87 | 0.92 | 8.02E-03 | 3.58E-04 | 3.38E-02 | 8.32E-04 |
| NP_000010.1    | ACAT1     | acetyl-CoA acetyltransferase, mitochondrial precursor                                        | 0.96 | 1.06 | 1.02 | 1.00 | 1.86E-02 | 2.04E-03 | 7.88E-02 | 1.75E-02 |
| XP_011513902.1 | EIF3B     | eukaryotic translation initiation factor 3 subunit B isoform X1                              | 0.93 | 0.98 | 0.91 | 1.03 | 1.65E-02 | 1.64E-03 | 1.54E-01 | 6.26E-02 |
| NP_001681.2    | ATP6V1A   | V-type proton ATPase catalytic subunit A                                                     | 1.01 | 1.02 | 1.03 | 1.05 | 5.57E-02 | 1.60E-02 | 5.26E-01 | 4.03E-01 |
| NP_689508.3    | TARS1     | threonine--tRNA ligase 1, cytoplasmic isoform 1                                              | 1.05 | 1.00 | 1.05 | 1.01 | 1.07E-02 | 6.39E-04 | 5.06E-02 | 5.26E-03 |
| NP_004981.2    | MARS1     | methionine--tRNA ligase, cytoplasmic                                                         | 1.07 | 0.96 | 1.03 | 1.03 | 4.32E-02 | 9.88E-03 | 6.35E-02 | 1.04E-02 |
| NP_002202.2    | ITGB1     | integrin beta-1 isoform 1A precursor                                                         | 0.89 | 1.03 | 0.92 | 1.03 | 2.85E-02 | 4.45E-03 | 4.33E-02 | 2.85E-03 |
| NP_001278798.1 | IGF2BP2   | insulin-like growth factor 2 mRNA-binding protein 2 isoform c                                | 1.03 | 0.96 | 0.99 | 1.02 | 4.10E-01 | 2.90E-01 | 2.14E-01 | 1.05E-01 |
| NP_003964.3    | RPL14     | 60S ribosomal protein L14                                                                    | 1.07 | 1.01 | 1.08 | 1.00 | 1.66E-02 | 1.71E-03 | 1.15E-01 | 3.75E-02 |
| XP_011540695.1 | FUBP1     | far upstream element-binding protein 1 isoform X4                                            | 0.94 | 1.01 | 0.95 | 0.96 | 1.09E-01 | 4.57E-02 | 1.16E-01 | 3.85E-02 |
| NP_001143.2    | SLC25A5   | ADP/ATP translocase 2                                                                        | 1.16 | 0.87 | 1.00 | 1.05 | 1.68E-02 | 1.74E-03 | 3.45E-02 | 1.07E-03 |
| NP_004530.1    | NARS1     | asparagine--tRNA ligase, cytoplasmic                                                         | 1.10 | 1.05 | 1.15 | 1.06 | 8.42E-02 | 3.07E-02 | 3.33E-01 | 2.07E-01 |
| XP_016864369.1 | WDR1      | WD repeat-containing protein 1 isoform X1                                                    | 1.11 | 0.95 | 1.05 | 1.00 | 7.55E-02 | 2.59E-02 | 6.60E-02 | 1.13E-02 |
| XP_011539410.2 | UBR4      | E3 ubiquitin-protein ligase UBR4 isoform X1                                                  | 1.07 | 0.98 | 1.05 | 1.03 | 1.68E-01 | 8.60E-02 | 1.48E-01 | 5.87E-02 |
| NP_060530.3    | IARS2     | isoleucine--tRNA ligase, mitochondrial precursor                                             | 1.11 | 0.96 | 1.06 | 1.06 | 1.21E-02 | 8.37E-04 | 3.53E-02 | 1.62E-03 |
| NP_060117.3    | FTSJ3     | pre-rRNA 2'-O-ribose RNA methyltransferase FTSJ3                                             | 1.06 | 0.99 | 1.05 | 1.02 | 1.83E-02 | 2.00E-03 | 8.67E-02 | 2.21E-02 |
| NP_001018146.1 | NME1-NME2 | NME1-NME2 protein                                                                            | 1.02 | 0.95 | 0.97 | 0.97 | 1.05E-01 | 4.30E-02 | 6.60E-02 | 1.12E-02 |
| XP_024302117.1 | EPB41L2   | band 4.1-like protein 2 isoform X7                                                           | 0.99 | 1.02 | 1.01 | 1.10 | 6.09E-01 | 5.03E-01 | 3.22E-01 | 1.97E-01 |
| NP_001966.1    | ENO2      | gamma-enolase                                                                                | 1.12 | 1.09 | 1.22 | 1.13 | 1.00E-01 | 4.00E-02 | 4.50E-01 | 3.22E-01 |
| NP_001012.1    | RPS17     | 40S ribosomal protein S17                                                                    | 0.97 | 1.03 | 0.99 | 0.92 | 4.18E-01 | 2.98E-01 | 2.41E-01 | 1.26E-01 |
| NP_006262.1    | S100A1    | protein S100-A1                                                                              | 0.75 | 1.04 | 0.78 | 0.82 | 3.21E-02 | 5.64E-03 | 4.87E-02 | 4.55E-03 |
| NP_001188267.1 | SAFB      | scaffold attachment factor B1 isoform 1                                                      | 0.82 | 1.01 | 0.83 | 0.91 | 9.65E-03 | 4.93E-04 | 3.53E-02 | 1.67E-03 |
| NP_008996.1    | CDC37     | hsp90 co-chaperone Cdc37                                                                     | 0.94 | 1.05 | 0.99 | 0.97 | 6.23E-03 | 2.25E-04 | 4.55E-02 | 3.76E-03 |
| NP_005800.3    | PRDX2     | peroxiredoxin-2                                                                              | 1.04 | 1.03 | 1.06 | 1.04 | 5.90E-02 | 1.76E-02 | 5.35E-01 | 4.12E-01 |
| NP_002624.2    | PGM1      | phosphoglucomutase-1 isoform 1                                                               | 1.05 | 0.98 | 1.02 | 1.01 | 1.90E-01 | 1.02E-01 | 1.32E-01 | 4.87E-02 |
| NP_001091675.1 | HNRNPF    | heterogeneous nuclear ribonucleoprotein F                                                    | 1.04 | 0.94 | 0.97 | 0.97 | 3.90E-02 | 8.27E-03 | 7.68E-02 | 1.63E-02 |
| NP_001317178.1 | HNRNPA3   | heterogeneous nuclear ribonucleoprotein A3 isoform a                                         | 0.94 | 0.98 | 0.92 | 0.97 | 2.44E-01 | 1.43E-01 | 3.73E-01 | 2.45E-01 |
| NP_000843.1    | GSTP1     | glutathione S-transferase P                                                                  | 1.03 | 0.98 | 1.00 | 0.99 | 8.60E-02 | 3.17E-02 | 7.96E-02 | 1.79E-02 |
| NP_001158287.1 | ACIN1     | apoptotic chromatin condensation inducer in the nucleus isoform 3                            | 0.95 | 0.99 | 0.94 | 1.00 | 1.77E-02 | 1.89E-03 | 1.47E-01 | 5.81E-02 |
| NP_002256.2    | KPNB1     | importin subunit beta-1 isoform 1                                                            | 1.07 | 0.99 | 1.07 | 0.99 | 8.06E-02 | 2.87E-02 | 1.24E-01 | 4.30E-02 |

|                |         |                                                                     |      |      |      |      |          |          |          |          |
|----------------|---------|---------------------------------------------------------------------|------|------|------|------|----------|----------|----------|----------|
| NP_002943.2    | RPS2    | 40S ribosomal protein S2                                            | 1.10 | 0.96 | 1.05 | 1.00 | 3.86E-02 | 7.98E-03 | 5.01E-02 | 5.15E-03 |
| NP_001351154.1 | HNRNP1  | heterogeneous nuclear ribonucleoprotein H isoform c                 | 0.97 | 0.96 | 0.93 | 0.98 | 1.25E-01 | 5.59E-02 | 6.54E-01 | 5.49E-01 |
| NP_000445.1    | SOD1    | superoxide dismutase [Cu-Zn]                                        | 0.75 | 1.04 | 0.77 | 0.97 | 1.52E-02 | 1.42E-03 | 3.49E-02 | 1.13E-03 |
| NP_055555.1    | EIF4A3  | eukaryotic initiation factor 4A-III                                 | 1.13 | 0.87 | 0.98 | 1.02 | 6.28E-02 | 1.95E-02 | 7.18E-02 | 1.42E-02 |
| NP_005886.2    | GOLGA3  | golgin subfamily A member 3 isoform 1                               | 0.96 | 0.98 | 0.95 | 1.00 | 1.58E-01 | 7.84E-02 | 3.42E-01 | 2.15E-01 |
| NP_000886.1    | LTA4H   | leukotriene A-4 hydrolase isoform 1                                 | 1.11 | 0.98 | 1.08 | 1.07 | 7.53E-02 | 2.57E-02 | 8.57E-02 | 2.14E-02 |
| NP_006537.3    | IGF2BP1 | insulin-like growth factor 2 mRNA-binding protein 1 isoform 1       | 1.11 | 0.96 | 1.06 | 1.02 | 5.04E-02 | 1.31E-02 | 5.62E-02 | 7.35E-03 |
| NP_001279.2    | CLIC1   | chloride intracellular channel protein 1                            | 1.05 | 1.08 | 1.13 | 1.04 | 3.64E-01 | 2.46E-01 | 6.62E-01 | 5.57E-01 |
| NP_009123.1    | SUPT16H | FACT complex subunit SPT16                                          | 1.04 | 0.99 | 1.03 | 1.05 | 2.70E-01 | 1.66E-01 | 2.24E-01 | 1.13E-01 |
| XP_005269798.1 | ANXA11  | annexin A11 isoform X1                                              | 1.02 | 0.99 | 1.01 | 1.04 | 9.09E-01 | 8.69E-01 | 8.73E-01 | 8.21E-01 |
| NP_001675.3    | ATP2B4  | plasma membrane calcium-transporting ATPase 4 isoform 4b            | 1.07 | 1.06 | 1.13 | 1.06 | 1.86E-01 | 9.94E-02 | 7.95E-01 | 7.19E-01 |
| NP_002800.2    | PSMD3   | 26S proteasome non-ATPase regulatory subunit 3                      | 1.11 | 0.96 | 1.07 | 1.05 | 2.19E-02 | 2.76E-03 | 4.55E-02 | 3.73E-03 |
| NP_001013269.1 | SLC3A2  | 4F2 cell-surface antigen heavy chain isoform f                      | 1.04 | 1.08 | 1.12 | 0.96 | 3.99E-01 | 2.79E-01 | 3.82E-01 | 2.53E-01 |
| NP_036222.3    | MACF1   | microtubule-actin cross-linking factor 1                            | 1.06 | 0.96 | 1.01 | 1.04 | 2.02E-01 | 1.12E-01 | 1.20E-01 | 4.11E-02 |
| NP_001001.2    | RPS6    | 40S ribosomal protein S6                                            | 1.02 | 0.99 | 1.01 | 0.93 | 2.67E-01 | 1.64E-01 | 2.17E-01 | 1.08E-01 |
| NP_005436.1    | SMC3    | structural maintenance of chromosomes protein 3                     | 1.07 | 0.97 | 1.04 | 1.02 | 1.05E-01 | 4.32E-02 | 1.13E-01 | 3.60E-02 |
| NP_065393.1    | RTN4    | reticulon-4 isoform A                                               | 1.02 | 0.99 | 1.01 | 1.02 | 6.64E-01 | 5.66E-01 | 5.36E-01 | 4.13E-01 |
| NP_001028886.1 | NOP2    | probable 28S rRNA (cytosine(4447)-C(5))-methyltransferase isoform 1 | 1.06 | 1.02 | 1.08 | 1.11 | 4.42E-01 | 3.22E-01 | 6.64E-01 | 5.59E-01 |
| NP_001406.1    | EIF2S3  | eukaryotic translation initiation factor 2 subunit 3                | 1.06 | 0.98 | 1.03 | 0.99 | 1.87E-02 | 2.08E-03 | 4.32E-02 | 2.73E-03 |
| NP_057371.2    | HP1BP3  | heterochromatin protein 1-binding protein 3 isoform 1               | 1.02 | 1.03 | 1.05 | 1.03 | 1.03E-01 | 4.13E-02 | 7.78E-01 | 6.97E-01 |
| XP_016882334.1 | NUCB1   | nucleobindin-1 isoform X1                                           | 0.87 | 1.06 | 0.92 | 0.93 | 2.67E-02 | 4.01E-03 | 4.48E-02 | 3.45E-03 |
| NP_778225.1    | H2BU1   | histone H2B type 3-B                                                | 1.03 | 0.98 | 1.01 | 0.93 | 2.60E-01 | 1.58E-01 | 1.49E-01 | 5.95E-02 |
| NP_002717.3    | PREP    | prolyl endopeptidase                                                | 1.04 | 1.00 | 1.04 | 1.03 | 4.07E-01 | 2.87E-01 | 6.03E-01 | 4.88E-01 |
| XP_024308566.1 | GPD2    | glycerol-3-phosphate dehydrogenase, mitochondrial isoform X1        | 1.04 | 0.97 | 1.01 | 1.05 | 2.02E-02 | 2.43E-03 | 3.45E-02 | 9.23E-04 |
| NP_001291217.1 | RPSA    | 40S ribosomal protein SA isoform 2                                  | 1.11 | 0.88 | 0.98 | 1.06 | 4.28E-02 | 9.77E-03 | 4.47E-02 | 3.44E-03 |
| NP_001351796.1 | IFI16   | gamma-interferon-inducible protein 16 isoform 3                     | 1.02 | 0.93 | 0.95 | 1.00 | 2.22E-03 | 3.24E-05 | 6.12E-02 | 9.51E-03 |
| NP_001748.1    | CBR1    | carbonyl reductase [NADPH] 1 isoform 1                              | 1.08 | 0.96 | 1.04 | 1.00 | 1.54E-01 | 7.59E-02 | 1.21E-01 | 4.13E-02 |
| NP_055045.2    | SRP68   | signal recognition particle subunit SRP68 isoform 1                 | 1.13 | 0.98 | 1.11 | 1.04 | 3.97E-02 | 8.51E-03 | 7.88E-02 | 1.71E-02 |
| NP_000687.3    | ALDH9A1 | 4-trimethylaminobutyraldehyde dehydrogenase isoform 1               | 1.09 | 0.98 | 1.07 | 1.04 | 4.65E-02 | 1.14E-02 | 7.17E-02 | 1.41E-02 |
| NP_001353454.1 | ATP2B1  | plasma membrane calcium-transporting ATPase 1 isoform 2             | 1.15 | 1.02 | 1.17 | 1.10 | 1.38E-01 | 6.45E-02 | 1.84E-01 | 8.52E-02 |
| NP_006382.1    | IPO7    | importin-7                                                          | 1.10 | 0.90 | 0.99 | 1.01 | 3.35E-02 | 6.05E-03 | 7.81E-02 | 1.68E-02 |
| NP_001317273.1 | TPM1    | tropomyosin alpha-1 chain isoform Tpm1.9cy                          | 0.80 | 1.14 | 0.92 | 0.96 | 3.47E-02 | 6.57E-03 | 4.16E-02 | 2.56E-03 |
| NP_001627.2    | SLC25A6 | ADP/ATP translocase 3                                               | 1.13 | 0.88 | 0.99 | 1.07 | 1.39E-01 | 6.55E-02 | 9.14E-02 | 2.50E-02 |
| NP_001299582.1 | H2BC12  | histone H2B type 1-K                                                | 0.98 | 0.98 | 0.97 | 0.89 | 1.70E-01 | 8.72E-02 | 8.46E-01 | 7.83E-01 |
| NP_001347.3    | DDX3X   | ATP-dependent RNA helicase DDX3X isoform 1                          | 0.95 | 0.96 | 0.92 | 0.98 | 7.34E-02 | 2.45E-02 | 5.10E-01 | 3.85E-01 |
| XP_016868908.1 | ASPH    | aspartyl/asparaginyl beta-hydroxylase isoform X1                    | 1.00 | 1.05 | 1.05 | 1.08 | 6.38E-01 | 5.38E-01 | 1.84E-01 | 8.52E-02 |
| NP_003923.2    | ST13    | hsc70-interacting protein isoform 1                                 | 0.87 | 0.99 | 0.86 | 0.99 | 7.94E-02 | 2.78E-02 | 1.08E-01 | 3.34E-02 |
| NP_001186601.1 | CALU    | calumenin isoform d precursor                                       | 0.58 | 1.43 | 0.81 | 0.68 | 1.18E-01 | 5.15E-02 | 1.48E-01 | 5.92E-02 |
| NP_004152.1    | RAB1A   | ras-related protein Rab-1A isoform 1                                | 1.11 | 0.96 | 1.06 | 1.01 | 8.31E-02 | 3.01E-02 | 8.12E-02 | 1.88E-02 |
| NP_000962.2    | RPL7    | 60S ribosomal protein L7 isoform 1                                  | 1.03 | 1.03 | 1.06 | 0.95 | 3.38E-02 | 6.20E-03 | 9.48E-01 | 9.26E-01 |
| NP_002148.1    | HSPE1   | 10 kDa heat shock protein, mitochondrial                            | 1.34 | 0.77 | 1.03 | 1.31 | 2.06E-02 | 2.52E-03 | 3.38E-02 | 7.92E-04 |
| NP_001304786.1 | EIF3CL  | eukaryotic translation initiation factor 3 subunit C-like protein   | 0.96 | 0.92 | 0.88 | 1.02 | 1.56E-01 | 7.70E-02 | 2.11E-01 | 1.04E-01 |
| NP_002296.1    | LGALS1  | galactin-1                                                          | 0.87 | 1.05 | 0.91 | 1.01 | 1.86E-03 | 2.43E-05 | 2.72E-02 | 1.76E-04 |
| NP_004930.1    | DDX1    | ATP-dependent RNA helicase DDX1                                     | 1.05 | 1.02 | 1.07 | 1.03 | 5.36E-02 | 1.50E-02 | 1.47E-01 | 5.83E-02 |
| NP_005007.2    | PCBP2   | poly(rC)-binding protein 2 isoform a                                | 0.97 | 0.93 | 0.90 | 0.93 | 1.10E-01 | 4.63E-02 | 1.13E-01 | 3.62E-02 |
| XP_024303169.1 | PSIP1   | PC4 and SFRS1-interacting protein isoform X3                        | 0.98 | 1.20 | 1.18 | 1.03 | 3.50E-01 | 2.33E-01 | 4.33E-02 | 2.90E-03 |
| NP_006494.1    | PSMC4   | 26S proteasome regulatory subunit 6B isoform 1                      | 1.06 | 0.97 | 1.03 | 1.01 | 1.38E-01 | 6.46E-02 | 1.03E-01 | 3.06E-02 |

|                |         |                                                                                       |      |      |      |      |          |          |          |          |
|----------------|---------|---------------------------------------------------------------------------------------|------|------|------|------|----------|----------|----------|----------|
| NP_056988.3    | EIF5B   | eukaryotic translation initiation factor 5B                                           | 1.09 | 0.98 | 1.07 | 1.03 | 2.12E-01 | 1.18E-01 | 2.87E-01 | 1.66E-01 |
| NP_064601.3    | RNPEP   | aminopeptidase B isoform a                                                            | 1.11 | 0.92 | 1.02 | 1.05 | 4.19E-02 | 9.37E-03 | 7.57E-02 | 1.59E-02 |
| NP_001142.2    | SLC25A4 | ADP/ATP translocase 1                                                                 | 1.05 | 1.00 | 1.05 | 0.98 | 2.62E-01 | 1.60E-01 | 2.85E-01 | 1.64E-01 |
| NP_003370.2    | EZR     | eZRin                                                                                 | 1.15 | 1.07 | 1.24 | 1.13 | 3.13E-02 | 5.31E-03 | 8.39E-02 | 2.02E-02 |
| NP_938405.1    | G3BP1   | ras GTPase-activating protein-binding protein 1                                       | 0.87 | 0.96 | 0.83 | 0.97 | 3.64E-02 | 7.17E-03 | 8.00E-02 | 1.81E-02 |
| NP_001121699.1 | GNE     | bifunctional UDP-N-acetylglucosamine 2-epimerase/N-acetylmannosamine kinase isoform 1 | 0.91 | 1.03 | 0.94 | 1.13 | 8.46E-02 | 3.10E-02 | 1.04E-01 | 3.15E-02 |
| NP_001019397.1 | ARF1    | ADP-ribosylation factor 1                                                             | 0.99 | 0.92 | 0.91 | 0.98 | 7.56E-01 | 6.75E-01 | 9.94E-02 | 2.90E-02 |
| NP_055018.2    | AP2A1   | AP-2 complex subunit alpha-1 isoform 1                                                | 0.98 | 0.96 | 0.94 | 1.00 | 4.64E-01 | 3.46E-01 | 4.91E-01 | 3.65E-01 |
| NP_937885.1    | EIF4G1  | eukaryotic translation initiation factor 4 gamma 1 isoform 3                          | 1.11 | 1.00 | 1.10 | 1.03 | 4.41E-02 | 1.03E-02 | 1.25E-01 | 4.35E-02 |
| NP_006808.1    | ERP29   | endoplasmic reticulum resident protein 29 isoform 1 precursor                         | 0.83 | 1.15 | 0.95 | 0.91 | 3.39E-02 | 6.34E-03 | 4.55E-02 | 3.67E-03 |
| XP_005257994.1 | AP2B1   | AP-2 complex subunit beta isoform X3                                                  | 0.99 | 0.99 | 0.97 | 1.01 | 6.43E-01 | 5.44E-01 | 9.66E-01 | 9.51E-01 |
| NP_006296.1    | ANP32A  | acidic leucine-rich nuclear phosphoprotein 32 family member A                         | 0.86 | 1.02 | 0.87 | 0.92 | 2.28E-03 | 3.50E-05 | 4.78E-02 | 4.16E-03 |
| NP_001317629.1 | TOP2B   | DNA topoisomerase 2-beta isoform 1                                                    | 1.14 | 0.93 | 1.07 | 1.01 | 1.55E-02 | 1.46E-03 | 5.83E-02 | 8.34E-03 |
| XP_011511001.1 | GOLGB1  | golgin subfamily B member 1 isoform X1                                                | 0.97 | 1.05 | 1.02 | 1.06 | 3.28E-01 | 2.14E-01 | 1.63E-01 | 6.98E-02 |
| XP_011508517.1 | UBAP2L  | ubiquitin-associated protein 2-like isoform X2                                        | 0.87 | 1.01 | 0.88 | 1.00 | 2.67E-02 | 4.04E-03 | 5.00E-02 | 5.05E-03 |
| NP_001072993.1 | PAICS   | multifunctional protein ADE2 isoform 1                                                | 1.04 | 1.04 | 1.08 | 1.03 | 2.44E-03 | 3.96E-05 | 7.30E-01 | 6.36E-01 |
| XP_011523401.1 | FKBP10  | peptidyl-prolyl cis-trans isomerase FKBP10 isoform X1                                 | 0.94 | 1.07 | 1.00 | 1.01 | 4.23E-04 | 2.36E-06 | 6.85E-02 | 1.26E-02 |
| XP_011537840.1 | PDCD11  | protein RRP5 homolog isoform X1                                                       | 1.04 | 0.99 | 1.02 | 1.01 | 1.84E-01 | 9.74E-02 | 1.41E-01 | 5.48E-02 |
| NP_065143.2    | ATP13A1 | manganese-transporting ATPase 13A1                                                    | 1.06 | 0.93 | 0.98 | 1.00 | 1.37E-01 | 6.36E-02 | 6.71E-02 | 1.19E-02 |
| NP_001291672.1 | SLK     | STE20-like serine/threonine-protein kinase isoform 2                                  | 1.02 | 1.02 | 1.04 | 1.04 | 4.44E-03 | 1.20E-04 | 4.24E-01 | 2.96E-01 |
| NP_001186600.1 | CALU    | calumenin isoform c precursor                                                         | 0.77 | 1.15 | 0.89 | 0.85 | 2.48E-03 | 4.15E-05 | 3.38E-02 | 6.93E-04 |
| NP_002780.1    | PSMA4   | proteasome subunit alpha type-4 isoform 1                                             | 1.09 | 0.97 | 1.07 | 1.02 | 2.84E-02 | 4.42E-03 | 8.74E-02 | 2.25E-02 |
| NP_001976.1    | ETFB    | electron transfer flavoprotein subunit beta isoform 1                                 | 1.06 | 0.98 | 1.04 | 1.04 | 1.17E-01 | 5.04E-02 | 1.74E-01 | 7.72E-02 |
| XP_016861049.1 | IGF2BP2 | insulin-like growth factor 2 mRNA-binding protein 2 isoform X4                        | 1.27 | 0.94 | 1.19 | 1.23 | 1.04E-01 | 4.24E-02 | 2.37E-01 | 1.23E-01 |
| NP_004757.1    | COPB2   | coatomer subunit beta'                                                                | 1.07 | 0.89 | 0.96 | 1.03 | 7.41E-02 | 2.50E-02 | 6.52E-02 | 1.09E-02 |
| XP_005269750.1 | MYOF    | myoferlin isoform X1                                                                  | 1.11 | 1.05 | 1.16 | 1.18 | 3.61E-02 | 7.02E-03 | 2.03E-01 | 9.89E-02 |
| NP_055102.3    | NOMO1   | nodal modulator 1 precursor                                                           | 1.00 | 0.99 | 0.99 | 1.00 | 8.29E-01 | 7.63E-01 | 5.68E-01 | 4.50E-01 |
| NP_057376.2    | TRAP1   | heat shock protein 75 kDa, mitochondrial isoform 1 precursor                          | 1.10 | 0.98 | 1.08 | 1.05 | 6.46E-02 | 2.03E-02 | 1.62E-01 | 6.90E-02 |
| NP_005868.1    | SF3A1   | splicing factor 3A subunit 1                                                          | 0.99 | 1.03 | 1.02 | 1.04 | 4.52E-01 | 3.33E-01 | 2.56E-01 | 1.38E-01 |
| NP_004550.2    | YBX1    | Y-box-binding protein 1                                                               | 0.75 | 1.03 | 0.77 | 0.88 | 2.02E-02 | 2.41E-03 | 5.00E-02 | 4.98E-03 |
| NP_000099.2    | DLD     | dihydrolipoyl dehydrogenase, mitochondrial isoform 1 precursor                        | 0.79 | 1.00 | 0.79 | 1.04 | 6.10E-03 | 2.09E-04 | 3.53E-02 | 1.57E-03 |
| NP_002517.1    | NT5E    | 5'-nucleotidase isoform 1                                                             | 1.11 | 1.01 | 1.11 | 1.14 | 3.26E-02 | 5.77E-03 | 5.53E-02 | 7.04E-03 |
| NP_002061.1    | GNAI2   | guanine nucleotide-binding protein G(i) subunit alpha-2 isoform 1                     | 1.07 | 0.95 | 1.02 | 1.05 | 1.46E-02 | 1.27E-03 | 3.53E-02 | 1.30E-03 |
| NP_056350.2    | SPATS2L | SPATS2-like protein isoform a                                                         | 0.80 | 0.96 | 0.77 | 0.89 | 1.71E-02 | 1.80E-03 | 1.30E-01 | 4.74E-02 |
| XP_005270330.1 | NOLC1   | nucleolar and coiled-body phosphoprotein 1 isoform X1                                 | 0.91 | 1.03 | 0.94 | 0.94 | 5.82E-02 | 1.73E-02 | 6.30E-02 | 1.01E-02 |
| NP_863654.1    | ACOT7   | cytosolic acyl coenzyme A thioester hydrolase isoform hBACHb                          | 1.14 | 0.94 | 1.08 | 1.03 | 5.06E-02 | 1.33E-02 | 6.60E-02 | 1.11E-02 |
| NP_001958.2    | EIF4A2  | eukaryotic initiation factor 4A-II                                                    | 1.02 | 0.75 | 0.77 | 1.13 | 7.68E-01 | 6.88E-01 | 8.65E-02 | 2.20E-02 |
| NP_001092006.1 | USP5    | ubiquitin carboxyl-terminal hydrolase 5 isoform 1                                     | 1.07 | 0.96 | 1.02 | 1.02 | 6.05E-02 | 1.84E-02 | 1.26E-01 | 4.43E-02 |
| XP_024307176.1 | ECH1    | delta(3,5)-Delta(2,4)-dienoyl-CoA isomerase, mitochondrial isoform X1                 | 1.14 | 0.92 | 1.05 | 1.10 | 2.03E-02 | 2.45E-03 | 3.42E-02 | 8.90E-04 |
| NP_006392.1    | ANP32B  | acidic leucine-rich nuclear phosphoprotein 32 family member B                         | 0.86 | 1.06 | 0.90 | 0.89 | 3.89E-02 | 8.20E-03 | 5.34E-02 | 6.25E-03 |
| NP_005073.2    | TRIM25  | E3 ubiquitin/ISG15 ligase TRIM25                                                      | 1.08 | 0.95 | 1.03 | 1.04 | 7.57E-03 | 3.22E-04 | 3.38E-02 | 8.55E-04 |
| NP_055439.1    | S100A6  | protein S100-A6                                                                       | 0.91 | 0.96 | 0.88 | 0.97 | 2.74E-01 | 1.71E-01 | 5.28E-01 | 4.06E-01 |
| XP_011538683.1 | SEC24C  | protein transport protein Sec24C isoform X1                                           | 1.05 | 0.98 | 1.03 | 1.05 | 2.72E-01 | 1.69E-01 | 2.07E-01 | 1.01E-01 |
| NP_061819.2    | NANS    | sialic acid synthase                                                                  | 1.12 | 1.00 | 1.11 | 1.02 | 6.57E-03 | 2.52E-04 | 5.79E-02 | 8.02E-03 |
| XP_024308556.1 | SPATS2L | SPATS2-like protein isoform X4                                                        | 0.85 | 0.90 | 0.76 | 1.01 | 7.19E-02 | 2.37E-02 | 4.82E-01 | 3.55E-01 |
| NP_001035809.1 | ABCE1   | ATP-binding cassette sub-family E member 1                                            | 1.09 | 0.99 | 1.08 | 1.01 | 2.51E-02 | 3.53E-03 | 5.00E-02 | 4.95E-03 |
| NP_002782.1    | PSMA6   | proteasome subunit alpha type-6 isoform a                                             | 1.11 | 0.98 | 1.09 | 1.07 | 1.87E-02 | 2.08E-03 | 3.53E-02 | 1.67E-03 |

|                |         |                                                                   |      |      |      |      |          |          |          |          |
|----------------|---------|-------------------------------------------------------------------|------|------|------|------|----------|----------|----------|----------|
| NP_055464.1    | SAFB2   | scaffold attachment factor B2                                     | 0.85 | 1.02 | 0.87 | 0.94 | 4.59E-02 | 1.11E-02 | 7.14E-02 | 1.39E-02 |
| NP_000468.1    | ALB     | serum albumin                                                     | 0.97 | 2.05 | 1.95 | 0.83 | 6.96E-01 | 6.05E-01 | 3.56E-01 | 2.28E-01 |
| NP_000980.1    | RPL30   | 60S ribosomal protein L30                                         | 1.09 | 0.96 | 1.05 | 1.00 | 4.78E-02 | 1.19E-02 | 5.11E-02 | 5.43E-03 |
| NP_003650.1    | AGPS    | alkyldihydroxyacetonephosphate synthase, peroxisomal precursor    | 1.11 | 0.98 | 1.09 | 1.00 | 3.48E-02 | 6.60E-03 | 6.66E-02 | 1.17E-02 |
| NP_004083.3    | ECHS1   | enoyl-CoA hydratase, mitochondrial                                | 1.07 | 0.97 | 1.04 | 1.05 | 5.09E-02 | 1.36E-02 | 6.35E-02 | 1.03E-02 |
| NP_055414.2    | MAGED2  | melanoma-associated antigen D2                                    | 1.15 | 0.97 | 1.12 | 1.06 | 5.74E-02 | 1.69E-02 | 6.71E-02 | 1.19E-02 |
| NP_002783.1    | PSMA7   | proteasome subunit alpha type-7                                   | 1.09 | 0.96 | 1.04 | 1.06 | 7.17E-02 | 2.36E-02 | 8.57E-02 | 2.14E-02 |
| NP_001238978.1 | PCMT1   | protein-L-isoaspartate(D-aspartate) O-methyltransferase isoform 2 | 1.06 | 0.98 | 1.04 | 0.99 | 8.16E-03 | 3.66E-04 | 3.31E-02 | 4.66E-04 |
| NP_055181.3    | GNL3    | guanine nucleotide-binding protein-like 3 isoform 1               | 1.07 | 0.94 | 1.00 | 1.01 | 1.98E-02 | 2.34E-03 | 5.85E-02 | 8.45E-03 |
| NP_006746.1    | TALDO1  | transaldolase                                                     | 1.07 | 1.04 | 1.12 | 1.06 | 2.51E-02 | 3.51E-03 | 8.47E-02 | 2.08E-02 |
| XP_024308603.1 | ANXA4   | annexin A4 isoform X1                                             | 1.13 | 1.00 | 1.13 | 1.11 | 2.77E-02 | 4.25E-03 | 4.75E-02 | 4.10E-03 |
| NP_055428.1    | FAF2    | FAS-associated factor 2                                           | 1.15 | 0.97 | 1.12 | 1.06 | 2.93E-02 | 4.76E-03 | 4.91E-02 | 4.61E-03 |
| NP_039234.1    | CLIC4   | chloride intracellular channel protein 4                          | 1.10 | 1.00 | 1.10 | 1.06 | 1.15E-01 | 4.89E-02 | 2.20E-01 | 1.10E-01 |
| NP_008855.1    | SRSF1   | serine/arginine-rich splicing factor 1 isoform 1                  | 0.76 | 1.05 | 0.80 | 0.85 | 1.43E-02 | 1.18E-03 | 3.49E-02 | 1.12E-03 |
| NP_006796.1    | HNRNPA0 | heterogeneous nuclear ribonucleoprotein A0                        | 0.83 | 1.00 | 0.83 | 0.92 | 1.90E-02 | 2.14E-03 | 4.30E-02 | 2.69E-03 |
| NP_060760.2    | PGM2    | phosphoglucomutase-2                                              | 1.11 | 0.96 | 1.07 | 1.02 | 1.82E-04 | 2.26E-07 | 5.35E-02 | 6.57E-03 |
| NP_000967.1    | RPL12   | 60S ribosomal protein L12                                         | 1.03 | 1.04 | 1.07 | 0.97 | 9.91E-02 | 3.92E-02 | 6.76E-01 | 5.72E-01 |
| NP_000964.1    | RPL8    | 60S ribosomal protein L8                                          | 0.97 | 1.02 | 0.99 | 0.94 | 5.11E-03 | 1.52E-04 | 4.39E-02 | 3.02E-03 |
| XP_016873006.1 | TKFC    | triokinase/FMN cyclase isoform X2                                 | 1.07 | 0.99 | 1.06 | 1.07 | 1.05E-01 | 4.32E-02 | 1.12E-01 | 3.56E-02 |
| NP_002807.1    | PSMD12  | 26S proteasome non-ATPase regulatory subunit 12 isoform 1         | 1.09 | 0.91 | 0.99 | 1.04 | 1.35E-01 | 6.27E-02 | 1.00E-01 | 2.94E-02 |
| NP_112740.1    | HNRNPD1 | heterogeneous nuclear ribonucleoprotein D-like isoform a          | 0.80 | 1.03 | 0.82 | 0.89 | 4.24E-02 | 9.57E-03 | 5.79E-02 | 8.09E-03 |
| XP_016875270.1 | RPL6    | 60S ribosomal protein L6 isoform X1                               | 1.01 | 1.06 | 1.07 | 0.92 | 6.00E-01 | 4.94E-01 | 1.76E-01 | 8.01E-02 |
| NP_001335116.1 | DDX27   | probable ATP-dependent RNA helicase DDX27 isoform 1               | 1.09 | 1.01 | 1.11 | 1.09 | 4.60E-02 | 1.11E-02 | 2.36E-01 | 1.23E-01 |
| NP_006169.2    | NSF     | vesicle-fusing ATPase                                             | 1.12 | 0.94 | 1.05 | 1.05 | 1.00E-01 | 3.99E-02 | 1.12E-01 | 3.56E-02 |
| NP_003225.2    | TFRC    | transferrin receptor protein 1 isoform 1                          | 0.88 | 1.08 | 0.96 | 1.11 | 1.46E-02 | 1.26E-03 | 4.33E-02 | 2.89E-03 |
| NP_001190174.1 | RPS10   | 40S ribosomal protein S10                                         | 1.00 | 1.01 | 1.01 | 0.98 | 9.27E-01 | 8.94E-01 | 2.90E-01 | 1.69E-01 |
| XP_024304469.1 | CARS1   | cysteine--tRNA ligase, cytoplasmic isoform X1                     | 1.12 | 0.99 | 1.12 | 1.05 | 2.86E-02 | 4.49E-03 | 7.98E-02 | 1.80E-02 |
| NP_002808.3    | PSMD13  | 26S proteasome non-ATPase regulatory subunit 13 isoform 1         | 1.07 | 0.97 | 1.03 | 1.01 | 1.66E-02 | 1.70E-03 | 3.49E-02 | 1.14E-03 |
| NP_002797.4    | PSMC6   | 26S proteasome regulatory subunit 10B isoform 1                   | 1.09 | 1.00 | 1.09 | 1.00 | 4.02E-02 | 8.71E-03 | 6.88E-02 | 1.28E-02 |
| NP_009215.1    | TWF2    | twinstin-2                                                        | 1.09 | 0.96 | 1.05 | 1.06 | 3.00E-01 | 1.91E-01 | 3.05E-01 | 1.82E-01 |
| NP_003130.2    | SRPRA   | signal recognition particle receptor subunit alpha isoform 1      | 1.20 | 1.09 | 1.32 | 1.08 | 1.66E-02 | 1.66E-03 | 6.52E-02 | 1.08E-02 |
| NP_001027565.1 | HNRNPH2 | heterogeneous nuclear ribonucleoprotein H2                        | 1.12 | 0.92 | 1.04 | 1.04 | 2.15E-01 | 1.21E-01 | 1.32E-01 | 4.87E-02 |
| NP_006818.3    | TMED10  | transmembrane emp24 domain-containing protein 10 precursor        | 1.19 | 0.99 | 1.18 | 1.09 | 1.15E-02 | 7.26E-04 | 3.38E-02 | 6.66E-04 |
| NP_001317598.1 | SARS1   | serine--tRNA ligase, cytoplasmic isoform b                        | 1.11 | 1.09 | 1.21 | 1.04 | 1.59E-01 | 7.93E-02 | 8.27E-01 | 7.57E-01 |
| NP_002071.2    | GOT2    | aspartate aminotransferase, mitochondrial isoform 1 precursor     | 1.19 | 0.90 | 1.07 | 1.04 | 2.30E-02 | 3.03E-03 | 6.02E-02 | 9.10E-03 |
| XP_024304471.1 | CARS1   | cysteine--tRNA ligase, cytoplasmic isoform X3                     | 1.39 | 0.76 | 1.03 | 1.30 | 4.92E-01 | 3.74E-01 | 2.96E-01 | 1.74E-01 |
| NP_000977.1    | RPL24   | 60S ribosomal protein L24                                         | 0.97 | 1.04 | 1.01 | 0.96 | 2.08E-01 | 1.16E-01 | 1.05E-01 | 3.18E-02 |
| NP_938074.2    | PRMT1   | protein arginine N-methyltransferase 1 isoform 3                  | 0.83 | 0.89 | 0.74 | 0.98 | 3.31E-02 | 5.94E-03 | 1.48E-01 | 5.87E-02 |
| NP_955392.1    | TPD52L2 | tumor protein D54 isoform a                                       | 0.91 | 1.03 | 0.93 | 0.94 | 2.65E-01 | 1.61E-01 | 3.15E-01 | 1.91E-01 |
| NP_006076.4    | BPNT1   | 3'(2'),5'-bisphosphate nucleotidase 1 isoform 1                   | 1.09 | 1.00 | 1.09 | 1.02 | 8.07E-02 | 2.88E-02 | 1.29E-01 | 4.64E-02 |
| NP_066299.2    | MYL6    | myosin light polypeptide 6 isoform 1                              | 0.82 | 1.04 | 0.85 | 0.90 | 4.78E-02 | 1.18E-02 | 6.14E-02 | 9.61E-03 |
| NP_001005360.1 | DNM2    | dynammin-2 isoform 1                                              | 1.09 | 1.00 | 1.09 | 1.03 | 6.57E-03 | 2.51E-04 | 8.47E-02 | 2.08E-02 |
| NP_000203.2    | ITGB3   | integrin beta-3 precursor                                         | 0.85 | 0.99 | 0.85 | 1.07 | 3.38E-02 | 6.21E-03 | 5.62E-02 | 7.31E-03 |
| NP_004726.2    | LRRFIP1 | leucine-rich repeat flightless-interacting protein 1 isoform 4    | 0.88 | 1.08 | 0.95 | 0.97 | 4.79E-02 | 1.20E-02 | 5.79E-02 | 8.07E-03 |
| NP_001306008.1 | HMGA1   | high mobility group protein HMG-I/HMG-Y isoform a                 | 0.86 | 1.02 | 0.87 | 0.98 | 5.08E-02 | 1.35E-02 | 7.16E-02 | 1.39E-02 |
| NP_001960.2    | EIF5    | eukaryotic translation initiation factor 5                        | 1.06 | 1.05 | 1.11 | 1.00 | 2.88E-01 | 1.81E-01 | 8.83E-01 | 8.34E-01 |
| NP_001118.3    | AP1B1   | AP-1 complex subunit beta-1 isoform a                             | 1.06 | 1.04 | 1.10 | 1.08 | 5.95E-02 | 1.79E-02 | 3.46E-01 | 2.19E-01 |

|                |          |                                                                                     |      |      |      |      |          |          |          |          |
|----------------|----------|-------------------------------------------------------------------------------------|------|------|------|------|----------|----------|----------|----------|
| NP_005137.1    | SART1    | U4/U6/U5 tri-snRNP-associated protein 1                                             | 0.94 | 1.01 | 0.95 | 0.99 | 1.51E-01 | 7.37E-02 | 1.63E-01 | 7.00E-02 |
| NP_004823.1    | GSTO1    | glutathione S-transferase omega-1 isoform 1                                         | 1.07 | 0.97 | 1.04 | 1.03 | 4.05E-02 | 8.82E-03 | 5.11E-02 | 5.39E-03 |
| NP_055706.1    | PDAP1    | 28 kDa heat- and acid-stable phosphoprotein                                         | 0.85 | 1.06 | 0.90 | 0.98 | 3.65E-02 | 7.20E-03 | 5.18E-02 | 5.69E-03 |
| NP_005600.1    | PYGM     | glycogen phosphorylase, muscle form isoform 1                                       | 1.23 | 0.96 | 1.17 | 1.15 | 1.58E-01 | 7.85E-02 | 1.56E-01 | 6.50E-02 |
| NP_055635.3    | TOMM70   | mitochondrial import receptor subunit TOM70                                         | 1.07 | 0.96 | 1.03 | 1.05 | 6.23E-02 | 1.91E-02 | 8.22E-02 | 1.92E-02 |
| NP_002622.2    | PGD      | 6-phosphogluconate dehydrogenase, decarboxylating isoform 1                         | 0.98 | 1.07 | 1.05 | 0.98 | 4.63E-01 | 3.45E-01 | 1.64E-01 | 7.04E-02 |
| NP_036364.2    | CAVIN1   | caveolae-associated protein 1                                                       | 0.93 | 1.05 | 0.98 | 0.99 | 2.21E-01 | 1.26E-01 | 1.74E-01 | 7.79E-02 |
| NP_006491.2    | MCAM     | cell surface glycoprotein MUC18 precursor                                           | 1.00 | 1.11 | 1.10 | 1.17 | 8.29E-01 | 7.63E-01 | 6.35E-02 | 1.04E-02 |
| NP_112243.1    | RAB1B    | ras-related protein Rab-1B                                                          | 1.02 | 0.99 | 1.01 | 1.01 | 7.36E-01 | 6.50E-01 | 6.41E-01 | 5.30E-01 |
| XP_011516714.1 | FAM120A  | constitutive coactivator of PPAR-gamma-like protein 1 isoform X1                    | 0.97 | 0.96 | 0.94 | 1.03 | 3.53E-01 | 2.37E-01 | 7.75E-01 | 6.93E-01 |
| NP_003839.2    | SUCLG2   | succinate--CoA ligase [GDP-forming] subunit beta, mitochondrial isoform 2 precursor | 1.16 | 0.90 | 1.04 | 1.07 | 2.65E-01 | 1.62E-01 | 2.65E-01 | 1.47E-01 |
| NP_002799.3    | PSMD2    | 26S proteasome non-ATPase regulatory subunit 2 isoform 1                            | 1.08 | 1.00 | 1.09 | 1.01 | 2.08E-02 | 2.56E-03 | 1.72E-01 | 7.58E-02 |
| NP_001307661.1 | CAPG     | macrophage-capping protein isoform 1                                                | 1.09 | 0.97 | 1.06 | 0.93 | 7.69E-03 | 3.35E-04 | 3.49E-02 | 1.13E-03 |
| NP_060676.2    | VPS35    | vacuolar protein sorting-associated protein 35                                      | 0.97 | 0.98 | 0.95 | 1.01 | 1.17E-01 | 5.06E-02 | 8.77E-01 | 8.26E-01 |
| NP_005491.1    | SAE1     | SUMO-activating enzyme subunit 1 isoform a                                          | 1.02 | 0.98 | 1.00 | 1.04 | 1.85E-01 | 9.82E-02 | 1.34E-01 | 4.99E-02 |
| NP_003356.2    | UQCRC1   | cytochrome b-c1 complex subunit 1, mitochondrial precursor                          | 1.10 | 0.98 | 1.08 | 1.05 | 1.44E-02 | 1.21E-03 | 5.83E-02 | 8.28E-03 |
| NP_001006.1    | RPS11    | 40S ribosomal protein S11                                                           | 1.10 | 0.99 | 1.09 | 0.99 | 6.28E-02 | 1.94E-02 | 8.74E-02 | 2.24E-02 |
| XP_024308119.1 | ACSL4    | long-chain-fatty-acid--CoA ligase 4 isoform X2                                      | 0.98 | 1.07 | 1.05 | 1.14 | 1.10E-01 | 4.62E-02 | 5.94E-02 | 8.70E-03 |
| NP_001350685.1 | ECPAS    | proteasome adapter and scaffold protein ECM29 isoform 2                             | 1.11 | 0.93 | 1.03 | 1.02 | 2.21E-01 | 1.25E-01 | 1.74E-01 | 7.73E-02 |
| NP_003361.1    | VASP     | vasodilator-stimulated phosphoprotein                                               | 1.09 | 1.04 | 1.13 | 1.07 | 4.32E-02 | 9.88E-03 | 1.20E-01 | 4.10E-02 |
| NP_542379.1    | APEX1    | DNA-(apurinic or apyrimidinic site) lyase                                           | 1.08 | 0.95 | 1.03 | 1.06 | 7.60E-02 | 2.62E-02 | 6.65E-02 | 1.15E-02 |
| NP_001309423.1 | GSS      | glutathione synthetase                                                              | 1.07 | 0.99 | 1.06 | 1.03 | 5.04E-02 | 1.32E-02 | 1.39E-01 | 5.30E-02 |
| NP_001531.1    | HSPB1    | heat shock protein beta-1                                                           | 0.87 | 1.03 | 0.90 | 1.02 | 4.61E-02 | 1.13E-02 | 5.72E-02 | 7.78E-03 |
| NP_001651.1    | ARF4     | ADP-ribosylation factor 4                                                           | 1.16 | 0.87 | 1.00 | 1.02 | 5.01E-02 | 1.30E-02 | 5.00E-02 | 5.03E-03 |
| NP_004951.1    | FUS      | RNA-binding protein FUS isoform 1                                                   | 0.63 | 1.10 | 0.70 | 0.71 | 1.43E-02 | 1.19E-03 | 3.45E-02 | 1.05E-03 |
| NP_075385.1    | MARCKSL1 | MARCKS-related protein                                                              | 0.76 | 0.97 | 0.74 | 0.94 | 8.84E-03 | 4.25E-04 | 3.33E-02 | 6.19E-04 |
| NP_068733.1    | CFL2     | cofilin-2 isoform 1                                                                 | 1.00 | 1.02 | 1.02 | 1.10 | 9.16E-01 | 8.78E-01 | 7.31E-01 | 6.37E-01 |
| NP_001017992.1 | ACTBL2   | beta-actin-like protein 2                                                           | 1.14 | 0.93 | 1.06 | 1.30 | 2.36E-01 | 1.37E-01 | 3.42E-01 | 2.15E-01 |
| XP_016868728.1 | PUF60    | poly(U)-binding-splicing factor PUF60 isoform X13                                   | 1.00 | 0.98 | 0.98 | 1.01 | 9.49E-01 | 9.28E-01 | 2.98E-01 | 1.75E-01 |
| NP_002699.1    | PPP1CA   | serine/threonine-protein phosphatase PP1-alpha catalytic subunit isoform 1          | 1.06 | 0.89 | 0.95 | 1.06 | 9.25E-02 | 3.51E-02 | 5.00E-02 | 5.00E-03 |
| NP_005561.1    | LMAN1    | protein ERGIC-53 precursor                                                          | 1.14 | 1.00 | 1.15 | 1.07 | 3.27E-02 | 5.81E-03 | 5.79E-02 | 8.13E-03 |
| NP_000968.2    | RPL13    | 60S ribosomal protein L13 isoform 1                                                 | 0.95 | 1.06 | 1.01 | 0.96 | 1.62E-01 | 8.16E-02 | 8.44E-02 | 2.06E-02 |
| NP_005316.1    | H1-1     | histone H1.1                                                                        | 0.74 | 1.12 | 0.83 | 0.86 | 4.49E-02 | 1.06E-02 | 7.16E-02 | 1.40E-02 |
| XP_011532244.1 | PRKAR2A  | cAMP-dependent protein kinase type II-alpha regulatory subunit isoform X1           | 1.06 | 0.97 | 1.03 | 1.06 | 3.19E-02 | 5.53E-03 | 4.07E-02 | 2.41E-03 |
| NP_001427.2    | FBL      | rRNA 2'-O-methyltransferase fibrillar                                               | 1.09 | 0.97 | 1.05 | 1.05 | 2.65E-02 | 3.93E-03 | 6.60E-02 | 1.12E-02 |
| NP_598000.2    | CD109    | CD109 antigen isoform 1                                                             | 0.95 | 0.95 | 0.91 | 1.01 | 2.55E-02 | 3.65E-03 | 4.55E-01 | 3.27E-01 |
| NP_061185.1    | RCC2     | protein RCC2                                                                        | 1.03 | 0.92 | 0.95 | 0.99 | 1.96E-01 | 1.06E-01 | 7.83E-02 | 1.69E-02 |
| XP_005249816.1 | OGDH     | 2-oxoglutarate dehydrogenase, mitochondrial isoform X1                              | 1.18 | 0.95 | 1.13 | 1.07 | 7.16E-03 | 2.90E-04 | 5.62E-02 | 7.27E-03 |
| NP_005795.2    | DDX39A   | ATP-dependent RNA helicase DDX39A                                                   | 1.07 | 0.93 | 1.00 | 1.00 | 3.68E-02 | 7.32E-03 | 5.10E-02 | 5.34E-03 |
| NP_001008.1    | RPS13    | 40S ribosomal protein S13                                                           | 1.01 | 1.02 | 1.03 | 0.92 | 9.54E-02 | 3.68E-02 | 1.56E-01 | 6.47E-02 |
| XP_011509878.1 | RANBP2   | E3 SUMO-protein ligase RanBP2 isoform X6                                            | 1.06 | 0.98 | 1.04 | 1.05 | 5.66E-02 | 1.64E-02 | 1.59E-01 | 6.73E-02 |
| NP_001001973.1 | ATP5F1C  | ATP synthase subunit gamma, mitochondrial isoform L (liver) precursor               | 1.17 | 0.88 | 1.03 | 1.05 | 5.36E-02 | 1.50E-02 | 5.00E-02 | 5.01E-03 |
| NP_001136402.1 | API5     | apoptosis inhibitor 5 isoform a                                                     | 1.02 | 0.99 | 1.01 | 1.02 | 1.65E-01 | 8.34E-02 | 2.03E-01 | 9.87E-02 |
| NP_937818.1    | NME1     | nucleoside diphosphate kinase A isoform a                                           | 0.94 | 1.02 | 0.96 | 1.02 | 1.58E-01 | 7.84E-02 | 2.43E-01 | 1.28E-01 |
| XP_016857524.1 | S100A13  | protein S100-A13 isoform X1                                                         | 0.81 | 1.02 | 0.82 | 0.81 | 2.16E-02 | 2.71E-03 | 4.55E-02 | 3.69E-03 |
| NP_001309897.1 | OAT      | ornithine aminotransferase, mitochondrial isoform 1 precursor                       | 1.37 | 0.96 | 1.32 | 1.10 | 1.96E-02 | 2.28E-03 | 4.43E-02 | 3.16E-03 |
| NP_710154.1    | IKBIP    | inhibitor of nuclear factor kappa-B kinase-interacting protein isoform 1            | 1.04 | 0.97 | 1.00 | 1.02 | 2.67E-02 | 4.03E-03 | 1.62E-01 | 6.90E-02 |

|                |         |                                                                             |      |      |      |      |          |          |          |          |
|----------------|---------|-----------------------------------------------------------------------------|------|------|------|------|----------|----------|----------|----------|
| NP_060140.2    | OTUB1   | ubiquitin thioesterase OTUB1                                                | 1.03 | 0.95 | 0.98 | 1.03 | 5.38E-02 | 1.51E-02 | 8.46E-02 | 2.06E-02 |
| XP_005246217.1 | HPCAL1  | hippocalcin-like protein 1 isoform X1                                       | 0.77 | 1.00 | 0.77 | 0.89 | 4.23E-04 | 2.33E-06 | 4.11E-02 | 2.50E-03 |
| XP_016867690.1 | LAMB1   | laminin subunit beta-1 isoform X1                                           | 0.80 | 0.93 | 0.75 | 0.88 | 4.15E-02 | 9.16E-03 | 8.25E-02 | 1.96E-02 |
| NP_005723.2    | RAD50   | DNA repair protein RAD50                                                    | 1.06 | 0.98 | 1.04 | 1.03 | 2.18E-01 | 1.23E-01 | 1.80E-01 | 8.19E-02 |
| NP_001171889.1 | SH3KBP1 | SH3 domain-containing kinase-binding protein 1 isoform c                    | 0.89 | 1.01 | 0.90 | 0.99 | 1.85E-01 | 9.85E-02 | 1.83E-01 | 8.44E-02 |
| NP_036473.2    | GTPBP4  | nucleolar GTP-binding protein 1                                             | 1.05 | 0.93 | 0.98 | 1.04 | 5.07E-02 | 1.34E-02 | 4.63E-02 | 3.88E-03 |
| NP_001305051.1 | AK1     | adenylate kinase isoenzyme 1 isoform 2                                      | 1.08 | 1.01 | 1.09 | 1.11 | 4.18E-02 | 9.25E-03 | 9.03E-02 | 2.42E-02 |
| NP_005508.1    | HMGN2   | non-histone chromosomal protein HMG-17                                      | 0.77 | 1.02 | 0.79 | 0.91 | 1.18E-02 | 8.02E-04 | 3.45E-02 | 9.79E-04 |
| NP_005142.1    | USP14   | ubiquitin carboxyl-terminal hydrolase 14 isoform a                          | 1.12 | 0.97 | 1.09 | 1.06 | 1.60E-02 | 1.55E-03 | 7.68E-02 | 1.63E-02 |
| XP_005268645.1 | CPSF6   | cleavage and polyadenylation specificity factor subunit 6 isoform X1        | 1.01 | 0.95 | 0.96 | 1.03 | 2.42E-01 | 1.42E-01 | 6.35E-02 | 1.04E-02 |
| NP_066997.3    | CCAR2   | cell cycle and apoptosis regulator protein 2 isoform 1                      | 1.08 | 0.94 | 1.02 | 1.02 | 1.34E-02 | 1.02E-03 | 3.53E-02 | 1.41E-03 |
| NP_036525.1    | PFAS    | phosphoribosylformylglycinamide synthase                                    | 1.09 | 0.98 | 1.07 | 1.08 | 5.88E-02 | 1.75E-02 | 6.88E-02 | 1.29E-02 |
| XP_005255126.1 | ATXN2L  | ataxin-2-like protein isoform X6                                            | 1.00 | 1.00 | 1.00 | 1.05 | 9.19E-01 | 8.82E-01 | 8.38E-01 | 7.73E-01 |
| XP_011517227.1 | NIBAN2  | protein Niban 2 isoform X2                                                  | 1.11 | 0.99 | 1.09 | 1.08 | 4.47E-02 | 1.06E-02 | 5.79E-02 | 8.18E-03 |
| NP_001106963.1 | SEPTIN9 | septin-9 isoform a                                                          | 1.05 | 1.02 | 1.07 | 1.06 | 1.19E-01 | 5.18E-02 | 3.81E-01 | 2.52E-01 |
| NP_000662.3    | ADH5    | alcohol dehydrogenase class-3                                               | 1.07 | 0.98 | 1.04 | 1.02 | 7.43E-02 | 2.51E-02 | 7.21E-02 | 1.47E-02 |
| NP_004628.4    | RAB7A   | ras-related protein Rab-7a                                                  | 1.10 | 0.99 | 1.10 | 1.05 | 8.22E-03 | 3.74E-04 | 3.87E-02 | 2.21E-03 |
| NP_002065.1    | GNB1    | guanine nucleotide-binding protein G(I)/G(S)/G(T) subunit beta-1 isoform 1  | 1.09 | 0.92 | 1.01 | 1.07 | 4.37E-02 | 1.01E-02 | 5.23E-02 | 5.98E-03 |
| XP_005256612.1 | FLII    | protein flightless-1 homolog isoform X1                                     | 1.08 | 1.03 | 1.11 | 1.09 | 1.44E-01 | 6.89E-02 | 2.73E-01 | 1.54E-01 |
| NP_005691.2    | DPP3    | dipeptidyl peptidase 3 isoform 1                                            | 1.13 | 0.96 | 1.08 | 1.05 | 2.82E-02 | 4.36E-03 | 7.14E-02 | 1.39E-02 |
| NP_001124161.1 | HMGB2   | high mobility group protein B2                                              | 0.79 | 1.01 | 0.80 | 0.90 | 1.95E-02 | 2.26E-03 | 3.69E-02 | 2.01E-03 |
| NP_004085.1    | EIF2S1  | eukaryotic translation initiation factor 2 subunit 1                        | 1.07 | 0.99 | 1.06 | 1.01 | 1.95E-01 | 1.06E-01 | 2.24E-01 | 1.13E-01 |
| NP_079031.2    | SLTM    | SAFB-like transcription modulator isoform a                                 | 0.89 | 1.03 | 0.91 | 0.94 | 4.88E-02 | 1.25E-02 | 6.02E-02 | 9.13E-03 |
| NP_000969.1    | RPL23   | 60S ribosomal protein L23                                                   | 0.98 | 1.11 | 1.09 | 1.00 | 3.57E-01 | 2.40E-01 | 7.02E-02 | 1.34E-02 |
| NP_002778.1    | PSMA2   | proteasome subunit alpha type-2                                             | 1.11 | 1.00 | 1.10 | 1.02 | 2.65E-02 | 3.94E-03 | 6.42E-02 | 1.05E-02 |
| NP_003396.1    | YWHAH   | 14-3-3 protein eta                                                          | 1.09 | 1.00 | 1.08 | 1.03 | 4.79E-02 | 1.20E-02 | 8.02E-02 | 1.85E-02 |
| NP_006001.5    | MANF    | mesencephalic astrocyte-derived neurotrophic factor precursor               | 1.04 | 1.04 | 1.08 | 1.08 | 1.49E-01 | 7.25E-02 | 5.91E-01 | 4.76E-01 |
| NP_001310245.1 | TGM2    | protein-glutamine gamma-glutamyltransferase 2 isoform a                     | 1.35 | 1.08 | 1.46 | 1.15 | 5.49E-02 | 1.56E-02 | 9.94E-02 | 2.90E-02 |
| NP_817092.1    | PPM1G   | protein phosphatase 1G                                                      | 0.91 | 1.02 | 0.92 | 0.96 | 3.38E-02 | 6.15E-03 | 4.86E-02 | 4.47E-03 |
| XP_011536806.1 | PPP1CC  | serine/threonine-protein phosphatase PP1-gamma catalytic subunit isoform X1 | 0.97 | 1.09 | 1.06 | 1.17 | 7.59E-01 | 6.78E-01 | 3.48E-01 | 2.21E-01 |
| NP_002809.2    | PSME2   | proteasome activator complex subunit 2                                      | 1.09 | 0.91 | 0.99 | 1.01 | 3.63E-02 | 7.13E-03 | 7.62E-02 | 1.61E-02 |
| NP_057190.2    | SCFD1   | sec1 family domain-containing protein 1 isoform a                           | 1.10 | 0.99 | 1.09 | 1.07 | 8.61E-02 | 3.18E-02 | 1.38E-01 | 5.21E-02 |
| NP_004883.3    | SEC22B  | vesicle-trafficking protein SEC22b precursor                                | 1.17 | 1.06 | 1.24 | 1.11 | 5.07E-02 | 1.33E-02 | 1.36E-01 | 5.08E-02 |
| NP_006089.1    | RACK1   | receptor of activated protein C kinase 1                                    | 1.07 | 0.97 | 1.04 | 1.03 | 3.39E-02 | 6.36E-03 | 4.91E-02 | 4.62E-03 |
| NP_062556.2    | RBMXL1  | RNA binding motif protein, X-linked-like-1                                  | 0.98 | 1.03 | 1.00 | 1.05 | 6.02E-01 | 4.96E-01 | 4.16E-01 | 2.89E-01 |
| NP_001900.1    | CTSD    | cathepsin D                                                                 | 0.79 | 0.83 | 0.66 | 0.91 | 1.28E-02 | 9.33E-04 | 7.32E-02 | 1.51E-02 |
| XP_024309269.1 | APEH    | acylamino-acid-releasing enzyme isoform X4                                  | 1.02 | 1.04 | 1.06 | 1.03 | 4.11E-01 | 2.91E-01 | 2.78E-01 | 1.58E-01 |
| NP_004068.2    | CS      | citrate synthase, mitochondrial precursor                                   | 1.10 | 0.96 | 1.06 | 1.02 | 1.05E-02 | 5.93E-04 | 3.66E-02 | 1.91E-03 |
| NP_065761.1    | LRRC47  | leucine-rich repeat-containing protein 47                                   | 1.11 | 0.97 | 1.07 | 1.05 | 7.13E-02 | 2.35E-02 | 8.25E-02 | 1.94E-02 |
| NP_003678.2    | PDLIM4  | PDZ and LIM domain protein 4 isoform 1                                      | 0.95 | 1.04 | 1.00 | 1.06 | 1.58E-02 | 1.52E-03 | 7.21E-02 | 1.46E-02 |
| NP_001020092.1 | RPL9    | 60S ribosomal protein L9                                                    | 1.09 | 0.96 | 1.04 | 1.01 | 1.39E-01 | 6.55E-02 | 1.76E-01 | 8.01E-02 |
| NP_006126.1    | CAPZA1  | F-actin-capping protein subunit alpha-1                                     | 1.07 | 1.00 | 1.07 | 1.08 | 1.66E-02 | 1.66E-03 | 4.67E-02 | 4.00E-03 |
| NP_009109.3    | STRAP   | serine-threonine kinase receptor-associated protein                         | 1.00 | 1.00 | 1.00 | 1.04 | 9.84E-01 | 9.77E-01 | 9.00E-01 | 8.56E-01 |
| XP_016857671.1 | RO60    | 60 kDa SS-A/Ro ribonucleoprotein isoform X2                                 | 1.06 | 0.98 | 1.04 | 1.06 | 1.38E-01 | 6.43E-02 | 1.30E-01 | 4.72E-02 |
| NP_001309366.1 | HNRNP3  | heterogeneous nuclear ribonucleoprotein H3 isoform a                        | 0.95 | 1.02 | 0.97 | 0.97 | 1.57E-01 | 7.80E-02 | 1.91E-01 | 9.05E-02 |
| NP_003320.2    | TXN     | thioredoxin isoform 1                                                       | 0.72 | 1.18 | 0.85 | 0.80 | 5.43E-02 | 1.53E-02 | 6.01E-02 | 9.06E-03 |
| NP_001345.1    | AKR1C2  | aldo-keto reductase family 1 member C2 isoform 1                            | 0.93 | 0.90 | 0.84 | 0.92 | 1.06E-02 | 6.28E-04 | 3.72E-01 | 2.43E-01 |

|                |         |                                                                                                                                     |      |      |      |      |          |          |          |          |
|----------------|---------|-------------------------------------------------------------------------------------------------------------------------------------|------|------|------|------|----------|----------|----------|----------|
| XP_016875261.1 | RAN     | GTP-binding nuclear protein Ran isoform X1                                                                                          | 1.13 | 0.97 | 1.09 | 1.02 | 2.83E-02 | 4.39E-03 | 4.47E-02 | 3.42E-03 |
| NP_003286.1    | TPT1    | translationally-controlled tumor protein isoform 2                                                                                  | 0.83 | 1.03 | 0.86 | 0.84 | 4.93E-02 | 1.27E-02 | 6.20E-02 | 9.84E-03 |
| NP_001193665.1 | NSFL1C  | NSFL1 cofactor p47 isoform d                                                                                                        | 0.88 | 1.07 | 0.93 | 0.95 | 1.51E-01 | 7.35E-02 | 1.55E-01 | 6.37E-02 |
| NP_005889.3    | CAPRIN1 | caprin-1 isoform 1                                                                                                                  | 0.68 | 1.03 | 0.70 | 0.86 | 3.94E-03 | 9.43E-05 | 2.37E-02 | 1.01E-04 |
| XP_024302561.1 | SRRT    | serrate RNA effector molecule homolog isoform X1                                                                                    | 1.05 | 0.97 | 1.02 | 1.01 | 5.17E-02 | 1.41E-02 | 6.35E-02 | 1.02E-02 |
| NP_002860.2    | RAB6A   | ras-related protein Rab-6A isoform a                                                                                                | 1.09 | 0.96 | 1.04 | 1.06 | 2.60E-02 | 3.80E-03 | 4.94E-02 | 4.70E-03 |
| XP_016864325.1 | AIMP1   | aminoacyl tRNA synthase complex-interacting multifunctional protein 1 isoform X1                                                    | 1.05 | 1.03 | 1.08 | 1.12 | 1.67E-01 | 8.52E-02 | 3.93E-01 | 2.64E-01 |
| NP_003339.1    | UBE2N   | ubiquitin-conjugating enzyme E2 N                                                                                                   | 0.99 | 1.03 | 1.02 | 0.98 | 4.24E-02 | 9.62E-03 | 3.38E-02 | 7.22E-04 |
| NP_001739.3    | CAPN2   | calpain-2 catalytic subunit isoform 1                                                                                               | 1.17 | 0.95 | 1.11 | 1.06 | 2.38E-02 | 3.21E-03 | 4.32E-02 | 2.79E-03 |
| XP_024303866.1 | ATAD3A  | ATPase family AAA domain-containing protein 3A isoform X1                                                                           | 1.08 | 0.98 | 1.05 | 1.00 | 7.83E-02 | 2.73E-02 | 7.92E-02 | 1.76E-02 |
| NP_055554.1    | BCLAF1  | bcl-2-associated transcription factor 1 isoform 1                                                                                   | 0.90 | 0.98 | 0.89 | 0.96 | 2.75E-02 | 4.20E-03 | 6.70E-02 | 1.18E-02 |
| XP_011511152.1 | MELTF   | melanotransferrin isoform X1                                                                                                        | 1.02 | 0.97 | 0.99 | 1.05 | 5.14E-01 | 3.98E-01 | 2.98E-01 | 1.76E-01 |
| NP_996759.1    | PPP1CB  | serine/threonine-protein phosphatase PPI-beta catalytic subunit isoform 1                                                           | 1.14 | 0.91 | 1.03 | 1.01 | 1.05E-01 | 4.30E-02 | 8.02E-02 | 1.83E-02 |
| NP_006017.1    | H1-10   | histone H1x                                                                                                                         | 1.11 | 1.05 | 1.17 | 0.97 | 7.39E-03 | 3.05E-04 | 7.06E-02 | 1.36E-02 |
| NP_004102.1    | FEN1    | flap endonuclease 1                                                                                                                 | 1.06 | 0.99 | 1.05 | 1.01 | 3.19E-02 | 5.57E-03 | 4.86E-02 | 4.45E-03 |
| NP_003579.3    | CUL4B   | cullin-4B isoform 1                                                                                                                 | 0.99 | 0.99 | 0.98 | 1.04 | 4.06E-02 | 8.86E-03 | 8.48E-01 | 7.86E-01 |
| NP_001264.2    | CHD4    | chromodomain-helicase-DNA-binding protein 4 isoform 1                                                                               | 0.99 | 0.92 | 0.91 | 1.00 | 7.00E-02 | 2.28E-02 | 5.84E-02 | 8.39E-03 |
| NP_003080.2    | SNRNP70 | U1 small nuclear ribonucleoprotein 70 kDa isoform 1                                                                                 | 0.96 | 1.00 | 0.96 | 1.00 | 1.58E-01 | 7.90E-02 | 1.74E-01 | 7.77E-02 |
| NP_000971.1    | RPL18A  | 60S ribosomal protein L18a                                                                                                          | 1.10 | 0.92 | 1.01 | 0.97 | 9.84E-02 | 3.86E-02 | 6.66E-02 | 1.16E-02 |
| XP_016883220.1 | RALY    | RNA-binding protein Raly isoform X1                                                                                                 | 1.03 | 0.92 | 0.94 | 0.98 | 4.60E-01 | 3.40E-01 | 1.07E-01 | 3.29E-02 |
| NP_002125.3    | HMOX2   | heme oxygenase 2 isoform b                                                                                                          | 1.11 | 0.96 | 1.06 | 1.03 | 4.60E-02 | 1.12E-02 | 1.03E-01 | 3.07E-02 |
| XP_011511808.1 | LYAR    | cell growth-regulating nucleolar protein isoform X1                                                                                 | 1.02 | 1.01 | 1.03 | 0.99 | 4.61E-01 | 3.43E-01 | 9.30E-01 | 9.00E-01 |
| XP_024302710.1 | CALD1   | caldesmon isoform X2                                                                                                                | 0.96 | 1.05 | 1.01 | 1.11 | 1.38E-01 | 6.46E-02 | 9.33E-02 | 2.59E-02 |
| NP_001016.1    | RPS23   | 40S ribosomal protein S23                                                                                                           | 0.98 | 1.01 | 0.99 | 0.96 | 2.75E-01 | 1.71E-01 | 2.10E-01 | 1.03E-01 |
| NP_001106966.1 | SEPTIN9 | septin-9 isoform e                                                                                                                  | 0.99 | 0.94 | 0.93 | 0.99 | 8.55E-01 | 7.97E-01 | 6.66E-01 | 5.61E-01 |
| NP_004631.1    | DDX39B  | spliceosome RNA helicase DDX39B                                                                                                     | 1.18 | 0.94 | 1.10 | 1.04 | 1.53E-01 | 7.47E-02 | 1.60E-01 | 6.81E-02 |
| XP_005262724.1 | UGDH    | UDP-glucose 6-dehydrogenase isoform X1                                                                                              | 1.03 | 0.99 | 1.01 | 1.02 | 2.36E-01 | 1.37E-01 | 1.74E-01 | 7.74E-02 |
| NP_001007075.1 | RPL32   | 60S ribosomal protein L32                                                                                                           | 0.99 | 0.98 | 0.97 | 0.95 | 2.37E-01 | 1.38E-01 | 5.68E-01 | 4.50E-01 |
| NP_001924.2    | DLST    | dihydropolyllysine-residue succinyltransferase component of 2-oxoglutarate dehydrogenase complex, mitochondrial isoform 1 precursor | 1.13 | 0.97 | 1.09 | 1.05 | 1.04E-01 | 4.21E-02 | 1.42E-01 | 5.53E-02 |
| NP_001308633.1 | RPS9    | 40S ribosomal protein S9 isoform a                                                                                                  | 0.97 | 1.05 | 1.02 | 0.87 | 5.10E-01 | 3.94E-01 | 2.26E-01 | 1.14E-01 |
| XP_005274734.1 | MAGEA4  | melanoma-associated antigen 4 isoform X1                                                                                            | 1.03 | 0.95 | 0.98 | 1.03 | 5.03E-01 | 3.86E-01 | 2.43E-01 | 1.28E-01 |
| NP_006342.2    | TIMM44  | mitochondrial import inner membrane translocase subunit TIM44                                                                       | 1.11 | 0.94 | 1.04 | 1.08 | 2.69E-03 | 4.86E-05 | 4.11E-02 | 2.47E-03 |
| NP_066565.1    | NMT1    | glycylpeptide N-tetradecanoyltransferase 1                                                                                          | 1.09 | 0.99 | 1.08 | 1.08 | 3.68E-02 | 7.35E-03 | 5.38E-02 | 6.72E-03 |
| XP_005266335.1 | ESD     | S-formylglutathione hydrolase isoform X1                                                                                            | 1.12 | 0.97 | 1.09 | 1.08 | 5.90E-02 | 1.77E-02 | 1.68E-01 | 7.29E-02 |
| NP_001026859.1 | PLAA    | phospholipase A-2-activating protein isoform 1                                                                                      | 1.18 | 0.88 | 1.05 | 1.08 | 1.17E-01 | 5.07E-02 | 9.04E-02 | 2.43E-02 |
| NP_644670.1    | EHD4    | EH domain-containing protein 4                                                                                                      | 1.10 | 1.06 | 1.17 | 1.10 | 4.05E-02 | 8.82E-03 | 4.32E-01 | 3.03E-01 |
| NP_036526.2    | PFDN2   | prefoldin subunit 2                                                                                                                 | 0.88 | 1.04 | 0.92 | 1.01 | 3.33E-02 | 6.00E-03 | 4.91E-02 | 4.64E-03 |
| NP_001349699.1 | CSNK2A1 | casein kinase II subunit alpha isoform a                                                                                            | 0.96 | 0.96 | 0.92 | 1.00 | 1.25E-01 | 5.63E-02 | 8.37E-01 | 7.71E-01 |
| NP_001352825.1 | NACA    | nascent polypeptide-associated complex subunit alpha isoform d                                                                      | 0.74 | 1.01 | 0.75 | 0.83 | 1.07E-02 | 6.60E-04 | 3.38E-02 | 6.79E-04 |
| NP_689953.1    | HIBADH  | 3-hydroxyisobutyrate dehydrogenase, mitochondrial precursor                                                                         | 1.08 | 0.98 | 1.06 | 1.05 | 3.13E-03 | 6.91E-05 | 1.00E-01 | 2.93E-02 |
| NP_002096.1    | H2AX    | histone H2AX                                                                                                                        | 0.90 | 1.07 | 0.96 | 0.84 | 2.65E-01 | 1.62E-01 | 1.74E-01 | 7.77E-02 |
| NP_078934.3    | IPO4    | importin-4                                                                                                                          | 1.01 | 0.97 | 0.98 | 0.97 | 7.11E-01 | 6.23E-01 | 2.47E-01 | 1.32E-01 |
| XP_005267319.1 | SEC23A  | protein transport protein Sec23A isoform X1                                                                                         | 1.20 | 0.87 | 1.04 | 1.03 | 1.90E-01 | 1.02E-01 | 1.64E-01 | 7.04E-02 |
| NP_001244.1    | CDC5L   | cell division cycle 5-like protein                                                                                                  | 0.99 | 0.97 | 0.96 | 1.02 | 5.49E-02 | 1.57E-02 | 6.78E-01 | 5.75E-01 |
| NP_064587.1    | NIT2    | omega-amidase NIT2                                                                                                                  | 1.10 | 0.98 | 1.08 | 1.06 | 3.39E-02 | 6.25E-03 | 5.18E-02 | 5.74E-03 |
| XP_016860272.1 | STAT1   | signal transducer and activator of transcription 1-alpha/beta isoform X1                                                            | 1.11 | 1.04 | 1.15 | 1.09 | 3.36E-02 | 6.08E-03 | 1.20E-01 | 4.06E-02 |



|                |          |                                                                             |      |      |      |      |          |          |          |          |
|----------------|----------|-----------------------------------------------------------------------------|------|------|------|------|----------|----------|----------|----------|
| NP_001092755.1 | PTMA     | prothymosin alpha isoform 1                                                 | 0.68 | 1.05 | 0.72 | 0.88 | 4.05E-02 | 8.79E-03 | 5.44E-02 | 6.85E-03 |
| NP_000180.2    | HK2      | hexokinase-2 isoform 1                                                      | 0.88 | 1.00 | 0.88 | 1.09 | 2.26E-02 | 2.90E-03 | 5.35E-02 | 6.63E-03 |
| NP_001170884.1 | RPS27A   | ubiquitin-40S ribosomal protein S27a precursor                              | 0.92 | 1.00 | 0.92 | 0.94 | 4.23E-04 | 2.29E-06 | 7.52E-02 | 1.58E-02 |
| NP_001290472.1 | VBP1     | prefoldin subunit 3 isoform 2                                               | 0.99 | 1.03 | 1.02 | 1.05 | 8.25E-01 | 7.58E-01 | 3.56E-01 | 2.29E-01 |
| NP_005727.1    | ACTR1A   | alpha-centractin                                                            | 0.89 | 1.17 | 1.04 | 0.94 | 1.05E-01 | 4.30E-02 | 5.98E-02 | 9.00E-03 |
| NP_055866.1    | ERP44    | endoplasmic reticulum resident protein 44 precursor                         | 1.06 | 1.00 | 1.06 | 1.03 | 5.26E-02 | 1.46E-02 | 8.02E-02 | 1.85E-02 |
| XP_011523281.1 | NPLOC4   | nuclear protein localization protein 4 homolog isoform X1                   | 1.10 | 0.99 | 1.08 | 1.05 | 8.61E-02 | 3.18E-02 | 1.08E-01 | 3.35E-02 |
| NP_004809.2    | DDX23    | probable ATP-dependent RNA helicase DDX23                                   | 1.08 | 0.95 | 1.03 | 1.02 | 1.05E-01 | 4.28E-02 | 1.14E-01 | 3.69E-02 |
| NP_001309862.1 | STAU1    | double-stranded RNA-binding protein Staufen homolog 1 isoform f             | 0.91 | 1.03 | 0.94 | 0.99 | 6.52E-03 | 2.43E-04 | 6.08E-02 | 9.40E-03 |
| NP_005264.2    | GNB2     | guanine nucleotide-binding protein G(I)/G(S)/G(T) subunit beta-2            | 1.09 | 0.96 | 1.05 | 1.05 | 7.44E-02 | 2.51E-02 | 1.25E-01 | 4.33E-02 |
| NP_002201.2    | ITGAV    | integrin alpha-V isoform 1                                                  | 0.95 | 0.94 | 0.89 | 0.95 | 3.53E-02 | 6.73E-03 | 1.71E-01 | 7.49E-02 |
| NP_203754.2    | TNKS1BP1 | 182 kDa tankyrase-1-binding protein                                         | 0.90 | 1.05 | 0.94 | 0.97 | 1.75E-01 | 9.11E-02 | 1.48E-01 | 5.93E-02 |
| XP_024304433.1 | SSRP1    | FACT complex subunit SSRP1 isoform X3                                       | 0.98 | 0.98 | 0.96 | 1.00 | 6.82E-01 | 5.88E-01 | 9.61E-01 | 9.44E-01 |
| NP_060225.4    | NSUN2    | RNA cytosine C(5)-methyltransferase NSUN2 isoform 1                         | 1.06 | 0.97 | 1.03 | 1.03 | 2.84E-02 | 4.41E-03 | 3.69E-02 | 1.99E-03 |
| NP_001035109.1 | FAM3C    | protein FAM3C precursor                                                     | 0.99 | 1.04 | 1.03 | 1.06 | 4.63E-01 | 3.45E-01 | 1.27E-01 | 4.52E-02 |
| NP_055070.1    | CNPY2    | protein canopy homolog 2 isoform 1 precursor                                | 0.83 | 1.04 | 0.87 | 0.87 | 2.80E-03 | 5.66E-05 | 1.80E-02 | 6.05E-05 |
| XP_011518397.1 | ARHGAP1  | rho GTPase-activating protein 1 isoform X2                                  | 1.07 | 1.01 | 1.09 | 1.06 | 5.33E-02 | 1.48E-02 | 8.38E-02 | 2.01E-02 |
| NP_001287831.1 | CD55     | complement decay-accelerating factor isoform 5 precursor                    | 1.06 | 1.06 | 1.12 | 1.24 | 3.01E-02 | 4.97E-03 | 8.61E-01 | 8.05E-01 |
| NP_061485.1    | RAC1     | ras-related C3 botulinum toxin substrate 1 isoform Rac1b                    | 1.07 | 1.03 | 1.10 | 1.03 | 5.64E-02 | 1.62E-02 | 1.57E-01 | 6.58E-02 |
| NP_065116.3    | XPNPEP1  | xaa-Pro aminopeptidase 1 isoform 1                                          | 1.06 | 0.99 | 1.05 | 1.05 | 1.28E-01 | 5.80E-02 | 1.60E-01 | 6.77E-02 |
| NP_003642.3    | YBX3     | Y-box-binding protein 3 isoform a                                           | 0.91 | 0.95 | 0.87 | 0.95 | 7.91E-02 | 2.76E-02 | 3.23E-01 | 1.98E-01 |
| NP_000088.3    | CPOX     | oxygen-dependent coproporphyrinogen-III oxidase, mitochondrial precursor    | 1.04 | 1.00 | 1.04 | 1.05 | 2.21E-01 | 1.26E-01 | 4.55E-01 | 3.26E-01 |
| NP_001003.1    | RPS8     | 40S ribosomal protein S8                                                    | 1.09 | 0.96 | 1.04 | 0.99 | 1.10E-02 | 6.82E-04 | 3.31E-02 | 5.26E-04 |
| NP_001117.2    | ADSS2    | adenylosuccinate synthetase isozyme 2 isoform 1                             | 1.00 | 0.96 | 0.96 | 1.01 | 9.81E-01 | 9.72E-01 | 4.77E-01 | 3.50E-01 |
| NP_001350066.1 | MTDH     | protein LYRIC isoform 3                                                     | 1.07 | 1.04 | 1.11 | 1.04 | 1.31E-02 | 9.89E-04 | 5.35E-02 | 6.55E-03 |
| NP_036555.1    | RPL13A   | 60S ribosomal protein L13a isoform 1                                        | 1.08 | 1.00 | 1.08 | 1.00 | 7.32E-02 | 2.45E-02 | 1.21E-01 | 4.13E-02 |
| XP_011534403.1 | UTRN     | utrophin isoform X1                                                         | 1.04 | 1.03 | 1.08 | 1.10 | 6.26E-02 | 1.94E-02 | 9.11E-01 | 8.70E-01 |
| XP_005257825.1 | SPAG9    | C-Jun-amino-terminal kinase-interacting protein 4 isoform X1                | 1.09 | 0.99 | 1.08 | 0.99 | 5.25E-02 | 1.45E-02 | 8.65E-02 | 2.18E-02 |
| NP_002085.3    | GSPT1    | eukaryotic peptide chain release factor GTP-binding subunit ERF3A isoform 1 | 1.09 | 0.97 | 1.06 | 1.01 | 2.25E-02 | 2.87E-03 | 5.79E-02 | 8.07E-03 |
| XP_016856050.1 | TXLNA    | alpha-taxilin isoform X1                                                    | 0.85 | 0.96 | 0.81 | 0.98 | 5.33E-02 | 1.48E-02 | 1.54E-01 | 6.28E-02 |
| NP_001087240.1 | TXNRD1   | thioredoxin reductase 1, cytoplasmic isoform 5                              | 1.22 | 0.97 | 1.18 | 1.06 | 5.74E-02 | 1.69E-02 | 7.88E-02 | 1.75E-02 |
| NP_078938.3    | NAT10    | RNA cytidine acetyltransferase isoform a                                    | 1.08 | 0.99 | 1.06 | 1.06 | 1.88E-02 | 2.11E-03 | 7.20E-02 | 1.45E-02 |
| NP_001171712.1 | VDAC2    | voltage-dependent anion-selective channel protein 2 isoform 1               | 1.13 | 0.94 | 1.06 | 1.03 | 5.71E-02 | 1.67E-02 | 5.62E-02 | 7.33E-03 |
| NP_002970.2    | SCP2     | non-specific lipid-transfer protein isoform 1 precursor                     | 1.05 | 1.00 | 1.05 | 0.99 | 8.14E-02 | 2.93E-02 | 3.10E-01 | 1.87E-01 |
| XP_011525622.1 | MYH14    | myosin-14 isoform X1                                                        | 1.01 | 1.09 | 1.10 | 1.16 | 7.90E-01 | 7.16E-01 | 2.32E-01 | 1.19E-01 |
| NP_006004.3    | RPL10    | 60S ribosomal protein L10 isoform a                                         | 1.09 | 0.99 | 1.08 | 1.02 | 1.98E-02 | 2.33E-03 | 5.38E-02 | 6.73E-03 |
| NP_001116428.1 | DBNL     | drebrin-like protein isoform c                                              | 1.10 | 1.12 | 1.21 | 0.99 | 9.29E-01 | 8.97E-01 | 8.91E-01 | 8.43E-01 |
| NP_067026.3    | SRPRB    | signal recognition particle receptor subunit beta                           | 1.13 | 1.12 | 1.27 | 1.22 | 4.60E-02 | 1.12E-02 | 6.70E-01 | 5.65E-01 |
| NP_001316851.1 | CALM3    | calmodulin-3 isoform 1                                                      | 0.70 | 1.14 | 0.80 | 0.86 | 1.51E-02 | 1.41E-03 | 3.38E-02 | 7.66E-04 |
| NP_004598.1    | TBCA     | tubulin-specific chaperone A isoform 2                                      | 0.77 | 1.07 | 0.83 | 0.93 | 6.23E-03 | 2.24E-04 | 3.53E-02 | 1.56E-03 |
| NP_001302460.1 | RPL26    | 60S ribosomal protein L26                                                   | 0.86 | 1.02 | 0.87 | 0.87 | 8.02E-03 | 3.57E-04 | 3.45E-02 | 1.05E-03 |
| NP_570850.2    | OPA1     | dynamin-like 120 kDa protein, mitochondrial isoform 8                       | 1.09 | 0.98 | 1.07 | 1.10 | 7.46E-02 | 2.53E-02 | 9.33E-02 | 2.59E-02 |
| NP_998776.1    | SLC25A3  | phosphate carrier protein, mitochondrial isoform b precursor                | 1.11 | 0.93 | 1.02 | 0.97 | 1.18E-01 | 5.15E-02 | 8.31E-02 | 1.98E-02 |
| NP_055693.4    | PUM3     | pumilio homolog 3                                                           | 1.04 | 0.99 | 1.02 | 1.00 | 2.51E-03 | 4.30E-05 | 2.72E-02 | 1.81E-04 |
| NP_001349652.1 | DBNL     | drebrin-like protein isoform f                                              | 0.89 | 1.05 | 0.94 | 1.03 | 5.04E-02 | 1.32E-02 | 6.60E-02 | 1.11E-02 |
| NP_001020262.1 | ABCF1    | ATP-binding cassette sub-family F member 1 isoform a                        | 1.06 | 1.02 | 1.08 | 1.03 | 1.29E-01 | 5.84E-02 | 3.01E-01 | 1.78E-01 |
| NP_057123.1    | RTRAF    | RNA transcription, translation and transport factor protein                 | 1.01 | 0.98 | 0.99 | 1.03 | 3.77E-01 | 2.59E-01 | 3.26E-01 | 2.02E-01 |

|                |         |                                                                          |      |      |      |      |          |          |          |          |
|----------------|---------|--------------------------------------------------------------------------|------|------|------|------|----------|----------|----------|----------|
| NP_001304106.1 | CHCHD3  | MICOS complex subunit MIC19 isoform 1                                    | 1.14 | 0.95 | 1.08 | 1.11 | 4.47E-02 | 1.06E-02 | 5.20E-02 | 5.83E-03 |
| NP_004392.1    | DFFA    | DNA fragmentation factor subunit alpha isoform 1                         | 0.90 | 1.07 | 0.96 | 1.00 | 1.63E-03 | 1.82E-05 | 1.80E-02 | 1.45E-05 |
| NP_001287789.1 | DDX46   | probable ATP-dependent RNA helicase DDX46 isoform 1                      | 0.99 | 1.00 | 1.00 | 1.00 | 4.23E-01 | 3.04E-01 | 4.75E-01 | 3.48E-01 |
| NP_001405.1    | EIF2B1  | translation initiation factor eIF-2B subunit alpha                       | 1.07 | 0.93 | 1.00 | 1.02 | 2.38E-02 | 3.22E-03 | 8.65E-02 | 2.19E-02 |
| NP_065385.2    | PBXIP1  | pre-B-cell leukemia transcription factor-interacting protein 1 isoform 1 | 0.98 | 0.98 | 0.96 | 0.99 | 9.97E-02 | 3.96E-02 | 9.65E-01 | 9.50E-01 |
| NP_001189342.1 | AKR1A1  | aldo-keto reductase family 1 member A1                                   | 1.12 | 1.01 | 1.13 | 1.10 | 5.88E-02 | 1.76E-02 | 1.13E-01 | 3.61E-02 |
| NP_945353.1    | ARHGEF1 | rho guanine nucleotide exchange factor 1 isoform 1                       | 1.12 | 0.93 | 1.05 | 1.06 | 5.29E-02 | 1.46E-02 | 8.67E-02 | 2.21E-02 |
| NP_036601.2    | PRPF6   | pre-mRNA-processing factor 6                                             | 1.04 | 1.00 | 1.04 | 1.04 | 6.26E-02 | 1.93E-02 | 8.57E-02 | 2.14E-02 |
| NP_001198.2    | BTF3    | transcription factor BTF3 isoform B                                      | 1.02 | 0.90 | 0.92 | 1.06 | 8.85E-01 | 8.40E-01 | 4.07E-01 | 2.77E-01 |
| NP_065090.1    | PCNP    | PEST proteolytic signal-containing nuclear protein isoform a             | 0.84 | 1.02 | 0.85 | 1.01 | 3.19E-02 | 5.56E-03 | 6.30E-02 | 1.00E-02 |
| NP_057671.2    | CBX3    | chromobox protein homolog 3                                              | 0.74 | 0.97 | 0.72 | 0.84 | 2.92E-02 | 4.71E-03 | 5.35E-02 | 6.38E-03 |
| NP_001670.1    | ATP1B3  | sodium/potassium-transporting ATPase subunit beta-3                      | 1.05 | 1.04 | 1.09 | 1.16 | 5.17E-02 | 1.41E-02 | 8.32E-01 | 7.64E-01 |
| NP_057175.1    | EIF3L   | eukaryotic translation initiation factor 3 subunit L isoform 1           | 1.00 | 0.89 | 0.90 | 1.00 | 8.79E-01 | 8.30E-01 | 1.38E-01 | 5.20E-02 |
| NP_005038.1    | PSMD5   | 26S proteasome non-ATPase regulatory subunit 5 isoform 1                 | 1.06 | 0.99 | 1.05 | 1.03 | 1.28E-01 | 5.80E-02 | 1.41E-01 | 5.46E-02 |
| NP_006787.2    | AFG3L2  | AFG3-like protein 2                                                      | 1.07 | 0.96 | 1.02 | 1.04 | 2.67E-02 | 4.01E-03 | 4.43E-02 | 3.13E-03 |
| NP_004621.2    | SF1     | splicing factor 1 isoform 1                                              | 0.87 | 1.04 | 0.91 | 0.91 | 2.87E-02 | 4.57E-03 | 8.65E-02 | 2.20E-02 |
| NP_003960.1    | UBE2M   | NEDD8-conjugating enzyme Ubc12                                           | 1.12 | 0.97 | 1.09 | 1.02 | 1.16E-01 | 5.00E-02 | 1.26E-01 | 4.44E-02 |
| NP_002865.1    | RAD23B  | UV excision repair protein RAD23 homolog B isoform 1                     | 0.94 | 1.02 | 0.96 | 0.96 | 1.56E-02 | 1.47E-03 | 5.56E-02 | 7.11E-03 |
| XP_016866762.1 | DEK     | protein DEK isoform X1                                                   | 0.93 | 0.99 | 0.92 | 0.96 | 4.24E-02 | 9.65E-03 | 1.03E-01 | 3.10E-02 |
| NP_003925.1    | FUBP3   | far upstream element-binding protein 3                                   | 1.07 | 0.99 | 1.06 | 1.05 | 3.11E-02 | 5.25E-03 | 6.35E-02 | 1.03E-02 |
| NP_060708.1    | AGK     | acylglycerol kinase, mitochondrial isoform 1 precursor                   | 1.03 | 1.00 | 1.03 | 1.04 | 1.49E-02 | 1.33E-03 | 4.39E-02 | 3.02E-03 |
| NP_009121.1    | SEC23IP | SEC23-interacting protein                                                | 1.10 | 1.07 | 1.18 | 1.09 | 1.68E-01 | 8.63E-02 | 5.50E-01 | 4.28E-01 |
| XP_016858161.1 | EIF4G3  | eukaryotic translation initiation factor 4 gamma 3 isoform X1            | 0.98 | 0.98 | 0.95 | 1.04 | 4.99E-01 | 3.81E-01 | 9.65E-01 | 9.50E-01 |
| NP_009106.1    | ERLIN2  | erlin-2 isoform 1                                                        | 1.21 | 0.92 | 1.11 | 1.06 | 1.44E-01 | 6.86E-02 | 1.15E-01 | 3.74E-02 |
| NP_005309.1    | H1-0    | histone H1.0                                                             | 0.95 | 1.13 | 1.08 | 0.84 | 1.96E-01 | 1.06E-01 | 7.96E-02 | 1.79E-02 |
| NP_003747.1    | EIF3H   | eukaryotic translation initiation factor 3 subunit H                     | 0.94 | 0.93 | 0.87 | 0.99 | 1.29E-03 | 1.23E-05 | 3.61E-01 | 2.33E-01 |
| NP_005796.1    | PSMD14  | 26S proteasome non-ATPase regulatory subunit 14                          | 1.10 | 0.99 | 1.09 | 1.05 | 4.18E-02 | 9.29E-03 | 8.93E-02 | 2.35E-02 |
| NP_001123514.1 | CRYZ    | quinone oxidoreductase isoform a                                         | 1.04 | 0.98 | 1.02 | 0.98 | 4.48E-01 | 3.29E-01 | 3.85E-01 | 2.56E-01 |
| NP_005713.1    | ACTR2   | actin-related protein 2 isoform b                                        | 1.04 | 0.99 | 1.04 | 1.01 | 1.55E-01 | 7.63E-02 | 2.85E-01 | 1.64E-01 |
| NP_000507.1    | GNAS    | protein GNAS isoform GNASL                                               | 1.09 | 0.94 | 1.03 | 1.01 | 1.51E-02 | 1.39E-03 | 4.47E-02 | 3.36E-03 |
| NP_877419.1    | TXNRD1  | thioredoxin reductase 1, cytoplasmic isoform 1                           | 1.22 | 1.18 | 1.43 | 1.16 | 4.06E-01 | 2.86E-01 | 9.22E-01 | 8.89E-01 |
| NP_001032726.1 | BTF3    | transcription factor BTF3 isoform A                                      | 0.89 | 1.05 | 0.93 | 1.00 | 2.34E-02 | 3.13E-03 | 5.62E-02 | 7.25E-03 |
| NP_006139.1    | LASP1   | LIM and SH3 domain protein 1 isoform a                                   | 0.95 | 1.03 | 0.98 | 1.01 | 9.23E-02 | 3.50E-02 | 7.27E-02 | 1.50E-02 |
| NP_002547.1    | OSBP    | oxysterol-binding protein 1                                              | 1.09 | 0.98 | 1.07 | 1.11 | 3.72E-02 | 7.49E-03 | 5.18E-02 | 5.77E-03 |
| NP_079472.1    | GRPEL1  | grpE protein homolog 1, mitochondrial precursor                          | 1.08 | 0.99 | 1.07 | 1.11 | 1.07E-01 | 4.42E-02 | 1.20E-01 | 4.10E-02 |
| NP_002784.1    | PSMB1   | proteasome subunit beta type-1                                           | 1.04 | 0.98 | 1.02 | 1.02 | 6.35E-02 | 1.99E-02 | 6.96E-02 | 1.32E-02 |
| XP_016882424.1 | PPP5C   | serine/threonine-protein phosphatase 5 isoform X1                        | 1.08 | 0.97 | 1.05 | 1.06 | 5.36E-02 | 1.50E-02 | 6.50E-02 | 1.07E-02 |
| XP_011541783.1 | ERAP1   | endoplasmic reticulum aminopeptidase 1 isoform X1                        | 1.00 | 0.98 | 0.98 | 1.02 | 8.95E-01 | 8.52E-01 | 4.04E-01 | 2.75E-01 |
| NP_060555.2    | IPO9    | impartin-9                                                               | 1.09 | 0.90 | 0.99 | 1.03 | 6.38E-02 | 2.00E-02 | 5.18E-02 | 5.63E-03 |
| XP_016861990.1 | PAK2    | serine/threonine-protein kinase PAK 2 isoform X1                         | 1.08 | 0.99 | 1.07 | 1.05 | 4.01E-02 | 8.61E-03 | 5.97E-02 | 8.87E-03 |
| XP_016874610.1 | CORO1C  | coronin-1C isoform X2                                                    | 1.07 | 1.11 | 1.19 | 1.10 | 1.11E-01 | 4.64E-02 | 3.73E-01 | 2.46E-01 |
| NP_001191397.1 | RBM10   | RNA-binding protein 10 isoform 5                                         | 0.98 | 1.02 | 0.99 | 1.05 | 3.70E-01 | 2.53E-01 | 2.33E-01 | 1.20E-01 |
| XP_011524051.1 | RNMT    | mRNA cap guanine-N7 methyltransferase isoform X1                         | 1.02 | 0.95 | 0.97 | 1.04 | 5.10E-01 | 3.94E-01 | 3.13E-01 | 1.89E-01 |
| NP_001341528.2 | IVD     | isovaleryl-CoA dehydrogenase, mitochondrial isoform 5                    | 1.04 | 0.95 | 0.99 | 1.09 | 1.55E-01 | 7.64E-02 | 9.42E-02 | 2.65E-02 |
| NP_003090.2    | SNX1    | sorting nexin-1 isoform a                                                | 0.91 | 0.94 | 0.86 | 0.97 | 2.29E-02 | 2.99E-03 | 1.57E-01 | 6.57E-02 |
| NP_001356311.1 | NAPIL4  | nucleosome assembly protein 1-like 4 isoform 2                           | 0.86 | 1.05 | 0.90 | 0.95 | 6.01E-02 | 1.82E-02 | 9.22E-02 | 2.55E-02 |
| NP_001284478.1 | UPF1    | regulator of nonsense transcripts 1 isoform 1                            | 1.00 | 0.98 | 0.97 | 1.00 | 5.61E-01 | 4.49E-01 | 5.04E-01 | 3.79E-01 |

|                |          |                                                                                       |      |      |      |      |          |          |          |          |
|----------------|----------|---------------------------------------------------------------------------------------|------|------|------|------|----------|----------|----------|----------|
| NP_001229236.1 | PITRM1   | presequence protease, mitochondrial isoform 1 precursor                               | 1.04 | 0.98 | 1.02 | 1.05 | 1.44E-01 | 6.92E-02 | 1.74E-01 | 7.72E-02 |
| XP_016879141.1 | USP7     | ubiquitin carboxyl-terminal hydrolase 7 isoform X1                                    | 1.05 | 0.96 | 1.01 | 0.99 | 6.40E-02 | 2.01E-02 | 6.60E-02 | 1.13E-02 |
| NP_006364.2    | VAT1     | synaptic vesicle membrane protein VAT-1 homolog                                       | 1.20 | 1.07 | 1.28 | 1.07 | 1.95E-02 | 2.26E-03 | 6.60E-02 | 1.13E-02 |
| NP_055984.1    | RRS1     | ribosome biogenesis regulatory protein homolog                                        | 0.82 | 1.08 | 0.89 | 0.99 | 5.35E-02 | 1.49E-02 | 7.18E-02 | 1.42E-02 |
| NP_006550.1    | KHDRBS1  | KH domain-containing, RNA-binding, signal transduction-associated protein 1 isoform 1 | 0.96 | 0.97 | 0.94 | 0.96 | 1.98E-01 | 1.08E-01 | 8.80E-01 | 8.29E-01 |
| NP_002818.1    | PTPN1    | tyrosine-protein phosphatase non-receptor type 1 isoform 1                            | 1.10 | 0.95 | 1.05 | 1.00 | 4.78E-03 | 1.39E-04 | 8.02E-02 | 1.84E-02 |
| NP_789839.1    | PSME3    | proteasome activator complex subunit 3 isoform 2                                      | 0.97 | 0.92 | 0.90 | 1.03 | 1.60E-01 | 7.99E-02 | 8.79E-02 | 2.27E-02 |
| NP_057308.1    | SNX9     | sorting nexin-9                                                                       | 1.07 | 0.94 | 1.01 | 1.03 | 1.32E-01 | 6.04E-02 | 8.40E-02 | 2.03E-02 |
| NP_665807.1    | LUZP6    | myotrophin                                                                            | 0.80 | 1.05 | 0.85 | 0.95 | 1.82E-02 | 1.96E-03 | 6.66E-02 | 1.16E-02 |
| NP_002781.2    | PSMA5    | proteasome subunit alpha type-5 isoform 1                                             | 1.10 | 0.93 | 1.03 | 1.08 | 6.18E-02 | 1.88E-02 | 5.62E-02 | 7.34E-03 |
| NP_001186913.1 | NDUFS1   | NADH-ubiquinone oxidoreductase 75 kDa subunit, mitochondrial isoform 5                | 0.96 | 0.95 | 0.92 | 1.08 | 1.31E-02 | 9.80E-04 | 7.27E-01 | 6.32E-01 |
| NP_057395.1    | ATP5IF1  | ATPase inhibitor, mitochondrial isoform 1 precursor                                   | 0.74 | 1.05 | 0.78 | 0.92 | 1.60E-02 | 1.56E-03 | 3.49E-02 | 1.14E-03 |
| NP_003357.2    | UQCRC2   | cytochrome b-c1 complex subunit 2, mitochondrial precursor                            | 1.05 | 0.99 | 1.05 | 1.05 | 2.01E-01 | 1.10E-01 | 2.29E-01 | 1.16E-01 |
| XP_024302775.1 | SCRN1    | secernin-1 isoform X1                                                                 | 1.03 | 1.08 | 1.11 | 1.04 | 3.11E-01 | 2.00E-01 | 3.07E-01 | 1.83E-01 |
| NP_055415.1    | EHD3     | EH domain-containing protein 3                                                        | 1.09 | 1.10 | 1.20 | 1.15 | 6.43E-01 | 5.43E-01 | 9.52E-01 | 9.30E-01 |
| NP_003959.3    | UBA3     | NEDD8-activating enzyme E1 catalytic subunit isoform 1                                | 1.15 | 0.96 | 1.10 | 1.06 | 1.48E-01 | 7.13E-02 | 1.28E-01 | 4.59E-02 |
| NP_001317160.1 | NAP1L1   | nucleosome assembly protein I-like 1 isoform 1                                        | 0.85 | 0.99 | 0.85 | 0.89 | 2.49E-02 | 3.48E-03 | 1.32E-01 | 4.82E-02 |
| NP_665912.1    | HMGAI    | high mobility group protein HMG-I/HMG-Y isoform b                                     | 0.83 | 1.06 | 0.88 | 0.95 | 6.44E-02 | 2.02E-02 | 8.90E-02 | 2.34E-02 |
| NP_072045.1    | RPS18    | 40S ribosomal protein S18                                                             | 0.97 | 1.04 | 1.01 | 0.94 | 2.62E-01 | 1.59E-01 | 1.66E-01 | 7.14E-02 |
| NP_006294.2    | AIMP2    | aminoacyl tRNA synthase complex-interacting multifunctional protein 2 isoform a       | 1.08 | 1.01 | 1.10 | 1.05 | 5.10E-02 | 1.37E-02 | 8.34E-02 | 1.99E-02 |
| NP_001305663.1 | KLC2     | kinesin light chain 2 isoform 1                                                       | 1.03 | 1.01 | 1.04 | 1.02 | 1.99E-01 | 1.09E-01 | 2.75E-01 | 1.56E-01 |
| NP_001300870.1 | RHOA     | transforming protein RhoA isoform 1 precursor                                         | 1.11 | 0.97 | 1.07 | 1.03 | 1.16E-02 | 7.47E-04 | 3.38E-02 | 7.97E-04 |
| NP_003125.3    | SRP14    | signal recognition particle 14 kDa protein isoform 1                                  | 0.91 | 1.04 | 0.94 | 1.02 | 8.06E-02 | 2.87E-02 | 7.69E-02 | 1.63E-02 |
| NP_000311.2    | QDPR     | dihydropteridine reductase isoform 1                                                  | 0.97 | 1.08 | 1.04 | 1.04 | 5.25E-01 | 4.11E-01 | 2.64E-01 | 1.45E-01 |
| NP_002788.1    | PSMB5    | proteasome subunit beta type-5 isoform 1                                              | 1.10 | 0.91 | 1.01 | 1.06 | 1.02E-01 | 4.11E-02 | 9.18E-02 | 2.52E-02 |
| XP_005258516.1 | HNRNPUL1 | heterogeneous nuclear ribonucleoprotein U-like protein 1 isoform X1                   | 1.06 | 0.97 | 1.02 | 1.02 | 3.78E-01 | 2.60E-01 | 3.22E-01 | 1.97E-01 |
| NP_001276879.1 | EEF1D    | elongation factor 1-delta isoform 2                                                   | 0.90 | 1.05 | 0.95 | 0.97 | 1.91E-01 | 1.03E-01 | 1.41E-01 | 5.46E-02 |
| NP_003306.3    | DNAJC7   | dnaJ homolog subfamily C member 7 isoform 1                                           | 1.00 | 0.98 | 0.99 | 1.04 | 9.26E-01 | 8.90E-01 | 6.25E-01 | 5.12E-01 |
| XP_011532748.1 | DBN1     | drebrin isoform X1                                                                    | 0.86 | 1.04 | 0.90 | 0.88 | 4.60E-02 | 1.11E-02 | 5.62E-02 | 7.31E-03 |
| NP_002615.2    | PFDN5    | prefoldin subunit 5 isoform alpha                                                     | 0.84 | 1.08 | 0.90 | 0.96 | 1.51E-02 | 1.35E-03 | 4.43E-02 | 3.11E-03 |
| NP_005678.3    | FARSB    | phenylalanine--tRNA ligase beta subunit                                               | 1.09 | 0.97 | 1.06 | 1.05 | 2.59E-01 | 1.56E-01 | 2.43E-01 | 1.28E-01 |
| XP_005245072.1 | PRRC2C   | protein PRRC2C isoform X1                                                             | 0.85 | 1.04 | 0.88 | 1.04 | 4.24E-02 | 9.61E-03 | 5.35E-02 | 6.46E-03 |
| NP_006354.2    | SEC23B   | protein transport protein Sec23B isoform 1                                            | 1.06 | 0.92 | 0.98 | 1.01 | 4.38E-02 | 1.02E-02 | 8.02E-02 | 1.84E-02 |
| NP_056417.2    | TOR1AIP1 | torsin-1A-interacting protein 1 isoform 2                                             | 1.17 | 1.00 | 1.17 | 1.04 | 4.16E-03 | 1.08E-04 | 3.38E-02 | 7.48E-04 |
| NP_001035807.1 | H2AC19   | histone H2A type 2-A                                                                  | 1.04 | 0.98 | 1.02 | 0.85 | 6.35E-01 | 5.32E-01 | 5.58E-01 | 4.35E-01 |
| NP_001688.1    | ATP5PO   | ATP synthase subunit O, mitochondrial precursor                                       | 1.17 | 1.00 | 1.17 | 1.04 | 1.05E-02 | 5.93E-04 | 6.60E-02 | 1.13E-02 |
| NP_000916.2    | PDHB     | pyruvate dehydrogenase E1 component subunit beta, mitochondrial isoform 1 precursor   | 1.14 | 0.96 | 1.10 | 1.05 | 2.43E-03 | 3.88E-05 | 4.32E-02 | 2.77E-03 |
| XP_011508441.1 | ARHGEF2  | rho guanine nucleotide exchange factor 2 isoform X1                                   | 1.00 | 0.99 | 0.99 | 1.00 | 9.80E-01 | 9.71E-01 | 8.81E-01 | 8.31E-01 |
| NP_057406.2    | RAB14    | ras-related protein Rab-14                                                            | 1.09 | 0.97 | 1.05 | 1.02 | 9.30E-02 | 3.53E-02 | 8.02E-02 | 1.82E-02 |
| NP_055317.1    | PRPF19   | pre-mRNA-processing factor 19                                                         | 1.05 | 0.91 | 0.95 | 1.01 | 1.42E-01 | 6.77E-02 | 5.68E-02 | 7.59E-03 |
| NP_001011.1    | RPS16    | 40S ribosomal protein S16 isoform 1                                                   | 1.15 | 0.84 | 0.97 | 0.99 | 8.86E-03 | 4.29E-04 | 2.72E-02 | 1.93E-04 |
| NP_006293.2    | MOGS     | mannosyl-oligosaccharide glucosidase isoform 1                                        | 1.13 | 0.99 | 1.12 | 1.07 | 4.97E-02 | 1.29E-02 | 9.44E-02 | 2.68E-02 |
| NP_112233.2    | SFXN3    | sideroflexin-3                                                                        | 1.07 | 0.96 | 1.03 | 1.03 | 2.05E-01 | 1.14E-01 | 1.34E-01 | 4.94E-02 |
| NP_476516.1    | NAA15    | N-alpha-acetyltransferase 15, NatA auxiliary subunit                                  | 1.09 | 0.99 | 1.08 | 1.00 | 9.71E-02 | 3.77E-02 | 1.04E-01 | 3.12E-02 |
| NP_005944.1    | MT2A     | metallothionein-2                                                                     | 0.33 | 0.85 | 0.29 | 0.90 | 1.05E-02 | 5.91E-04 | 3.45E-02 | 9.93E-04 |
| NP_001185824.1 | ACY1     | aminoacylase-1 isoform a                                                              | 0.97 | 1.02 | 0.99 | 1.00 | 1.29E-01 | 5.83E-02 | 8.37E-02 | 2.01E-02 |
| XP_005247870.2 | FXR1     | fragile X mental retardation syndrome-related protein 1 isoform X1                    | 0.98 | 0.98 | 0.96 | 0.96 | 6.29E-01 | 5.25E-01 | 8.51E-01 | 7.91E-01 |

|                |             |                                                                                               |      |      |      |      |          |          |          |          |
|----------------|-------------|-----------------------------------------------------------------------------------------------|------|------|------|------|----------|----------|----------|----------|
| NP_008937.1    | NUDT21      | cleavage and polyadenylation specificity factor subunit 5                                     | 1.09 | 0.95 | 1.04 | 1.06 | 2.30E-01 | 1.33E-01 | 1.59E-01 | 6.68E-02 |
| NP_001032752.1 | EEF1B2      | elongation factor 1-beta                                                                      | 0.80 | 1.06 | 0.85 | 0.89 | 2.28E-02 | 2.96E-03 | 3.63E-02 | 1.85E-03 |
| NP_004036.1    | ATOX1       | copper transport protein ATOX1                                                                | 0.74 | 0.99 | 0.73 | 0.83 | 5.10E-02 | 1.37E-02 | 9.07E-02 | 2.46E-02 |
| NP_055112.2    | ETHE1       | persulfide dioxygenase ETHE1, mitochondrial isoform 1                                         | 1.12 | 0.94 | 1.05 | 1.02 | 1.03E-01 | 4.18E-02 | 7.96E-02 | 1.79E-02 |
| NP_006612.2    | AHCYL1      | S-adenosylhomocysteine hydrolase-like protein 1 isoform a                                     | 1.05 | 0.99 | 1.04 | 1.08 | 3.21E-01 | 2.08E-01 | 2.84E-01 | 1.62E-01 |
| NP_001013.1    | RPS19       | 40S ribosomal protein S19 isoform 1                                                           | 0.88 | 1.08 | 0.95 | 0.90 | 2.60E-02 | 3.79E-03 | 3.69E-02 | 1.99E-03 |
| NP_001076.2    | SERPINA3    | alpha-1-antichymotrypsin precursor                                                            | 0.59 | 0.96 | 0.57 | 0.94 | 1.36E-02 | 1.08E-03 | 3.53E-02 | 1.25E-03 |
| NP_060802.1    | DDX19A      | ATP-dependent RNA helicase DDX19A isoform 1                                                   | 1.07 | 1.00 | 1.07 | 1.06 | 6.57E-03 | 2.50E-04 | 4.93E-02 | 4.67E-03 |
| XP_011521876.1 | ARHGDI1     | rho GDP-dissociation inhibitor 1 isoform X1                                                   | 1.16 | 0.91 | 1.05 | 1.05 | 1.45E-02 | 1.23E-03 | 3.45E-02 | 1.04E-03 |
| NP_001351228.1 | OXCT1       | succinyl-CoA:3-ketoacid coenzyme A transferase 1, mitochondrial isoform 1 precursor           | 1.14 | 0.93 | 1.06 | 1.12 | 4.82E-02 | 1.21E-02 | 5.01E-02 | 5.17E-03 |
| NP_006800.2    | TOMM34      | mitochondrial import receptor subunit TOM34                                                   | 1.03 | 1.00 | 1.03 | 1.07 | 2.62E-01 | 1.59E-01 | 4.37E-01 | 3.09E-01 |
| NP_001019.1    | RPS25       | 40S ribosomal protein S25                                                                     | 0.92 | 1.04 | 0.96 | 0.94 | 1.24E-01 | 5.53E-02 | 9.44E-02 | 2.67E-02 |
| XP_016874003.1 | BANF1       | barrier-to-autointegration factor isoform X1                                                  | 0.95 | 0.94 | 0.90 | 1.01 | 1.31E-01 | 5.97E-02 | 4.13E-01 | 2.85E-01 |
| NP_004999.1    | SNU13       | NHP2-like protein 1                                                                           | 0.99 | 1.06 | 1.05 | 1.04 | 8.75E-01 | 8.25E-01 | 2.88E-01 | 1.66E-01 |
| NP_057231.1    | PPME1       | protein phosphatase methylesterase 1 isoform a                                                | 1.01 | 1.00 | 1.02 | 1.02 | 9.39E-02 | 3.60E-02 | 5.98E-01 | 4.83E-01 |
| NP_001120700.1 | CBX1        | chromobox protein homolog 1                                                                   | 0.80 | 0.99 | 0.80 | 0.88 | 1.20E-01 | 5.25E-02 | 1.70E-01 | 7.47E-02 |
| NP_000476.1    | APRT        | adenine phosphoribosyltransferase isoform a                                                   | 1.08 | 0.99 | 1.07 | 0.99 | 6.97E-02 | 2.26E-02 | 9.07E-02 | 2.46E-02 |
| XP_011514672.1 | RBM28       | RNA-binding protein 28 isoform X1                                                             | 0.97 | 1.04 | 1.01 | 1.03 | 6.41E-01 | 5.41E-01 | 3.71E-01 | 2.43E-01 |
| NP_005653.3    | VDAC3       | voltage-dependent anion-selective channel protein 3 isoform 1                                 | 1.12 | 0.91 | 1.01 | 1.08 | 8.92E-02 | 3.36E-02 | 7.88E-02 | 1.72E-02 |
| NP_036220.1    | PGLS        | 6-phosphogluconolactonase                                                                     | 1.08 | 1.00 | 1.09 | 1.02 | 4.02E-02 | 8.68E-03 | 6.76E-02 | 1.21E-02 |
| NP_004138.1    | DRG1        | developmentally-regulated GTP-binding protein 1                                               | 1.01 | 1.05 | 1.07 | 1.02 | 4.62E-02 | 1.13E-02 | 1.14E-01 | 3.71E-02 |
| NP_778235.1    | H2AC21      | histone H2A type 2-B                                                                          | 1.04 | 1.01 | 1.05 | 0.97 | 2.30E-02 | 3.01E-03 | 6.71E-01 | 5.66E-01 |
| NP_001350687.1 | GATD3B      | glutamine amidotransferase-like class 1 domain-containing protein 3B, mitochondrial isoform 1 | 1.02 | 1.00 | 1.02 | 1.08 | 3.33E-01 | 2.18E-01 | 4.43E-01 | 3.15E-01 |
| NP_005101.1    | GFPT2       | glutamine--fructose-6-phosphate aminotransferase [isomerizing] 2                              | 0.96 | 0.98 | 0.95 | 1.06 | 5.34E-01 | 4.19E-01 | 7.53E-01 | 6.66E-01 |
| NP_002284.3    | LAMC1       | laminin subunit gamma-1 precursor                                                             | 0.85 | 0.92 | 0.79 | 0.91 | 9.39E-02 | 3.60E-02 | 2.85E-01 | 1.64E-01 |
| NP_001186797.1 | GLRX3       | glutaredoxin-3 isoform 1                                                                      | 0.94 | 1.00 | 0.94 | 1.00 | 3.33E-02 | 5.99E-03 | 1.43E-01 | 5.57E-02 |
| NP_001123537.1 | MYO9B       | unconventional myosin-IXb isoform 2                                                           | 1.05 | 0.99 | 1.04 | 1.08 | 6.64E-02 | 2.12E-02 | 1.65E-01 | 7.11E-02 |
| NP_056461.1    | RAP1B       | ras-related protein Rap-1b isoform 1 precursor                                                | 1.08 | 0.95 | 1.02 | 1.00 | 1.17E-01 | 5.08E-02 | 9.22E-02 | 2.54E-02 |
| NP_055768.3    | DIS3        | exosome complex exonuclease RRP44 isoform a                                                   | 1.10 | 0.91 | 0.99 | 1.01 | 3.44E-01 | 2.27E-01 | 2.65E-01 | 1.46E-01 |
| NP_006450.2    | ERLIN1      | erlin-1 isoform a                                                                             | 1.07 | 1.00 | 1.07 | 1.05 | 1.25E-01 | 5.63E-02 | 1.51E-01 | 6.10E-02 |
| NP_478059.1    | PSAT1       | phosphoserine aminotransferase isoform 1                                                      | 1.22 | 1.18 | 1.44 | 1.12 | 3.16E-02 | 5.39E-03 | 2.72E-01 | 1.53E-01 |
| NP_001035879.1 | PSPC1       | paraspeckle component 1 isoform 1                                                             | 0.98 | 1.00 | 0.97 | 1.06 | 2.35E-02 | 3.16E-03 | 4.47E-02 | 3.38E-03 |
| NP_001316.1    | CSTF2       | cleavage stimulation factor subunit 2 isoform 2                                               | 0.99 | 0.99 | 0.97 | 1.06 | 5.79E-01 | 4.69E-01 | 9.86E-01 | 9.81E-01 |
| XP_016875215.1 | PXN         | paxillin isoform X1                                                                           | 0.98 | 0.92 | 0.90 | 0.99 | 8.29E-01 | 7.62E-01 | 5.82E-01 | 4.67E-01 |
| NP_054779.1    | MCTS1       | malignant T-cell-amplified sequence 1 isoform 1                                               | 1.08 | 0.97 | 1.04 | 1.02 | 9.28E-02 | 3.52E-02 | 1.03E-01 | 3.10E-02 |
| NP_002558.1    | PEBP1       | phosphatidylethanolamine-binding protein 1                                                    | 1.04 | 0.97 | 1.01 | 1.07 | 3.41E-02 | 6.42E-03 | 3.69E-02 | 1.95E-03 |
| NP_000974.1    | RPL22       | 60S ribosomal protein L22                                                                     | 0.86 | 1.07 | 0.92 | 0.86 | 2.44E-01 | 1.44E-01 | 1.90E-01 | 8.94E-02 |
| XP_005269031.1 | PFKM        | ATP-dependent 6-phosphofruktokinase, muscle type isoform X1                                   | 1.11 | 0.98 | 1.08 | 1.07 | 5.49E-02 | 1.56E-02 | 1.52E-01 | 6.16E-02 |
| XP_005268405.1 | GNPDA1      | glucosamine-6-phosphate isomerase 1 isoform X1                                                | 1.14 | 0.95 | 1.09 | 1.06 | 6.70E-02 | 2.14E-02 | 6.64E-02 | 1.14E-02 |
| XP_011542636.1 | CEP170      | centrosomal protein of 170 kDa isoform X1                                                     | 0.99 | 1.01 | 1.01 | 1.01 | 8.66E-01 | 8.12E-01 | 6.82E-01 | 5.79E-01 |
| NP_004209.2    | RAB11B      | ras-related protein Rab-11B                                                                   | 1.05 | 1.00 | 1.06 | 1.07 | 5.88E-02 | 1.75E-02 | 1.45E-01 | 5.68E-02 |
| XP_006723200.1 | PRPF31      | U4/U6 small nuclear ribonucleoprotein Prp31 isoform X1                                        | 1.08 | 0.96 | 1.03 | 1.04 | 5.07E-02 | 1.34E-02 | 7.88E-02 | 1.74E-02 |
| XP_006715869.1 | SEPTIN7     | septin-7 isoform X2                                                                           | 1.08 | 1.00 | 1.08 | 1.00 | 5.18E-04 | 3.30E-06 | 4.43E-02 | 3.23E-03 |
| NP_000627.2    | SOD2        | superoxide dismutase [Mn], mitochondrial isoform A precursor                                  | 1.08 | 0.93 | 1.00 | 1.07 | 1.14E-01 | 4.83E-02 | 7.18E-02 | 1.43E-02 |
| NP_000954.1    | PTGS2       | prostaglandin G/H synthase 2                                                                  | 0.98 | 0.76 | 0.74 | 0.69 | 7.41E-02 | 2.50E-02 | 8.84E-02 | 2.31E-02 |
| NP_057103.2    | FMC1-LUC7L2 | putative RNA-binding protein Luc7-like 2 isoform 1                                            | 0.92 | 0.98 | 0.90 | 0.97 | 2.45E-02 | 3.40E-03 | 6.51E-02 | 1.07E-02 |

|                |          |                                                                                |      |      |      |      |          |          |          |          |
|----------------|----------|--------------------------------------------------------------------------------|------|------|------|------|----------|----------|----------|----------|
| XP_006715894.1 | SLC25A13 | calcium-binding mitochondrial carrier protein Aralar2 isoform X1               | 1.09 | 0.93 | 1.01 | 1.02 | 2.93E-02 | 4.76E-03 | 3.53E-02 | 1.55E-03 |
| NP_001353176.1 | GLOD4    | glyoxalase domain-containing protein 4 isoform 2                               | 1.06 | 0.98 | 1.04 | 1.03 | 2.12E-01 | 1.19E-01 | 1.70E-01 | 7.40E-02 |
| NP_003746.2    | EIF3G    | eukaryotic translation initiation factor 3 subunit G                           | 0.87 | 1.00 | 0.87 | 0.95 | 1.09E-01 | 4.52E-02 | 1.51E-01 | 6.11E-02 |
| NP_001171501.1 | SF1      | splicing factor 1 isoform 6                                                    | 0.85 | 0.96 | 0.82 | 0.98 | 6.82E-02 | 2.20E-02 | 1.88E-01 | 8.83E-02 |
| NP_001123579.1 | KLC1     | kinesin light chain 1 isoform 3                                                | 1.00 | 1.01 | 1.01 | 1.05 | 8.32E-01 | 7.66E-01 | 4.75E-01 | 3.48E-01 |
| NP_003109.1    | SPARC    | SPARC isoform 1 precursor                                                      | 0.69 | 0.99 | 0.68 | 0.97 | 1.27E-01 | 5.75E-02 | 1.52E-01 | 6.19E-02 |
| NP_001269374.1 | EHD1     | EH domain-containing protein 1 isoform 2                                       | 1.05 | 1.04 | 1.09 | 1.02 | 3.13E-01 | 2.02E-01 | 8.14E-01 | 7.41E-01 |
| NP_001653.1    | ARF5     | ADP-ribosylation factor 5                                                      | 0.91 | 1.03 | 0.94 | 1.00 | 1.58E-02 | 1.50E-03 | 7.20E-02 | 1.45E-02 |
| NP_001017.1    | RPS24    | 40S ribosomal protein S24 isoform c                                            | 1.07 | 1.04 | 1.11 | 1.00 | 1.86E-01 | 9.86E-02 | 5.24E-01 | 4.01E-01 |
| NP_065392.1    | APMAP    | adipocyte plasma membrane-associated protein                                   | 1.19 | 0.98 | 1.16 | 1.07 | 9.76E-03 | 5.09E-04 | 3.31E-02 | 5.78E-04 |
| XP_016873363.1 | UBXN1    | UBX domain-containing protein 1 isoform X2                                     | 0.97 | 0.99 | 0.96 | 1.04 | 1.09E-01 | 4.52E-02 | 4.11E-01 | 2.83E-01 |
| NP_001310550.1 | UNC45A   | protein unc-45 homolog A isoform 3                                             | 1.00 | 1.03 | 1.04 | 1.04 | 9.62E-01 | 9.46E-01 | 5.52E-01 | 4.30E-01 |
| XP_005265126.1 | GOLGA4   | golgin subfamily A member 4 isoform X1                                         | 1.04 | 1.04 | 1.09 | 1.07 | 5.52E-01 | 4.39E-01 | 9.96E-01 | 9.95E-01 |
| NP_005331.1    | HINT1    | histidine triad nucleotide-binding protein 1                                   | 1.07 | 0.96 | 1.03 | 1.16 | 5.15E-02 | 1.39E-02 | 1.04E-01 | 3.14E-02 |
| NP_006764.3    | DDX18    | ATP-dependent RNA helicase DDX18                                               | 1.10 | 1.01 | 1.11 | 1.04 | 2.32E-02 | 3.08E-03 | 6.77E-02 | 1.22E-02 |
| NP_001248755.1 | AP3D1    | AP-3 complex subunit delta-1 isoform 3                                         | 0.99 | 0.97 | 0.96 | 1.02 | 2.50E-01 | 1.49E-01 | 1.63E-01 | 7.02E-02 |
| NP_006283.1    | TSG101   | tumor susceptibility gene 101 protein                                          | 1.02 | 1.02 | 1.05 | 1.03 | 3.10E-01 | 1.99E-01 | 9.84E-01 | 9.78E-01 |
| NP_001305049.1 | SEC31A   | protein transport protein Sec31A isoform 1                                     | 1.06 | 0.96 | 1.02 | 1.06 | 7.46E-02 | 2.53E-02 | 6.88E-02 | 1.29E-02 |
| NP_001353064.1 | CMPK1    | UMP-CMP kinase isoform c                                                       | 1.00 | 1.01 | 1.01 | 1.00 | 9.98E-01 | 9.97E-01 | 6.90E-01 | 5.87E-01 |
| NP_001180500.1 | CSRP1    | cysteine and glycine-rich protein 1 isoform 1                                  | 1.03 | 0.97 | 0.99 | 1.10 | 6.42E-01 | 5.42E-01 | 3.47E-01 | 2.20E-01 |
| NP_003749.2    | EIF3J    | eukaryotic translation initiation factor 3 subunit J isoform 1                 | 0.94 | 1.01 | 0.94 | 1.04 | 1.22E-01 | 5.42E-02 | 1.32E-01 | 4.88E-02 |
| XP_024304529.1 | AIP      | AH receptor-interacting protein isoform X1                                     | 1.01 | 0.97 | 0.98 | 1.00 | 7.87E-01 | 7.12E-01 | 4.89E-01 | 3.62E-01 |
| XP_024308688.1 | SEPTIN2  | septin-2 isoform X1                                                            | 1.05 | 0.99 | 1.04 | 1.05 | 2.15E-01 | 1.21E-01 | 2.52E-01 | 1.36E-01 |
| NP_005617.2    | SRSF4    | serine/arginine-rich splicing factor 4                                         | 0.85 | 1.07 | 0.91 | 0.94 | 8.07E-02 | 2.88E-02 | 9.96E-02 | 2.91E-02 |
| NP_003840.2    | SUCLG1   | succinate--CoA ligase [ADP/GDP-forming] subunit alpha, mitochondrial precursor | 1.04 | 0.97 | 1.01 | 1.02 | 1.46E-02 | 1.27E-03 | 1.25E-01 | 4.39E-02 |
| NP_001353498.1 | SRRM1    | serine/arginine repetitive matrix protein 1 isoform 7                          | 0.93 | 1.03 | 0.96 | 1.02 | 1.95E-01 | 1.06E-01 | 1.68E-01 | 7.31E-02 |
| NP_031372.2    | OGFR     | opioid growth factor receptor                                                  | 1.08 | 0.95 | 1.03 | 1.00 | 2.88E-02 | 4.61E-03 | 6.85E-02 | 1.25E-02 |
| NP_004921.1    | CAPZB    | F-actin-capping protein subunit beta isoform 1                                 | 1.08 | 1.00 | 1.08 | 1.05 | 1.67E-01 | 8.49E-02 | 2.61E-01 | 1.43E-01 |
| NP_001619.1    | AKR1B1   | aldo-keto reductase family 1 member B1 isoform 1                               | 1.08 | 0.93 | 1.00 | 1.00 | 5.81E-02 | 1.72E-02 | 5.34E-02 | 6.17E-03 |
| NP_006861.1    | DSTN     | destrin isoform a                                                              | 1.05 | 0.89 | 0.93 | 1.05 | 2.84E-01 | 1.78E-01 | 8.21E-02 | 1.92E-02 |
| NP_060705.2    | CNDP2    | cytosolic non-specific dipeptidase isoform 1                                   | 1.07 | 1.04 | 1.12 | 1.02 | 5.39E-03 | 1.71E-04 | 3.53E-02 | 1.57E-03 |
| XP_016873712.2 | CAPN5    | calpain-5 isoform X2                                                           | 1.03 | 0.87 | 0.90 | 0.92 | 4.93E-02 | 1.27E-02 | 3.31E-02 | 5.89E-04 |
| XP_005261192.1 | PFKL     | ATP-dependent 6-phosphofructokinase, liver type isoform X3                     | 1.06 | 1.02 | 1.08 | 1.08 | 1.93E-01 | 1.04E-01 | 2.85E-01 | 1.64E-01 |
| NP_001015880.1 | PAPSS2   | bifunctional 3'-phosphoadenosine 5'-phosphosulfate synthase 2 isoform b        | 1.06 | 1.00 | 1.06 | 1.06 | 1.19E-01 | 5.22E-02 | 2.14E-01 | 1.06E-01 |
| NP_004270.2    | PMPCB    | mitochondrial-processing peptidase subunit beta precursor                      | 1.04 | 0.94 | 0.99 | 1.03 | 1.90E-01 | 1.02E-01 | 1.12E-01 | 3.54E-02 |
| NP_005852.2    | STUB1    | E3 ubiquitin-protein ligase CHIP isoform a                                     | 0.93 | 1.00 | 0.93 | 1.06 | 2.35E-02 | 3.16E-03 | 5.64E-02 | 7.45E-03 |
| NP_066926.1    | TMSB10   | thymosin beta-10                                                               | 0.54 | 1.15 | 0.62 | 0.84 | 4.98E-04 | 2.91E-06 | 1.81E-02 | 7.22E-05 |
| NP_054745.1    | DCPS     | m7GpppX diphosphatase isoform 2                                                | 1.10 | 0.96 | 1.06 | 1.05 | 3.56E-02 | 6.86E-03 | 4.48E-02 | 3.50E-03 |
| NP_066932.1    | TMSB4X   | thymosin beta-4                                                                | 0.66 | 1.14 | 0.75 | 0.87 | 1.06E-02 | 6.15E-04 | 3.31E-02 | 3.61E-04 |
| NP_001353299.1 | MCM3     | DNA replication licensing factor MCM3 isoform 4                                | 0.90 | 0.99 | 0.89 | 0.98 | 2.36E-01 | 1.37E-01 | 2.89E-01 | 1.68E-01 |
| NP_004246.2    | COX5A    | cytochrome c oxidase subunit 5A, mitochondrial precursor                       | 0.88 | 1.03 | 0.91 | 1.04 | 7.55E-02 | 2.60E-02 | 1.55E-01 | 6.41E-02 |
| NP_001034891.1 | CDC42    | cell division control protein 42 homolog isoform 1 precursor                   | 1.09 | 1.02 | 1.11 | 1.04 | 1.17E-01 | 5.06E-02 | 1.96E-01 | 9.40E-02 |
| NP_000982.2    | RPL28    | 60S ribosomal protein L28 isoform 2                                            | 1.12 | 0.97 | 1.08 | 0.98 | 5.74E-02 | 1.69E-02 | 6.35E-02 | 1.03E-02 |
| NP_569734.2    | PAGE5    | P antigen family member 5 isoform 1                                            | 0.63 | 1.20 | 0.76 | 0.76 | 3.42E-03 | 7.74E-05 | 1.80E-02 | 4.04E-05 |
| NP_001238968.1 | RAB5C    | ras-related protein Rab-5C isoform b                                           | 1.11 | 0.91 | 1.01 | 1.02 | 3.51E-01 | 2.34E-01 | 2.68E-01 | 1.49E-01 |
| NP_001137357.1 | PPP1R12A | protein phosphatase 1 regulatory subunit 12A isoform a                         | 0.96 | 1.06 | 1.01 | 1.00 | 3.89E-02 | 8.15E-03 | 8.36E-02 | 2.00E-02 |
| NP_001308400.1 | THRAP3   | thyroid hormone receptor-associated protein 3 isoform 1                        | 0.96 | 0.96 | 0.92 | 1.07 | 2.60E-01 | 1.57E-01 | 8.67E-01 | 8.13E-01 |

|                |          |                                                                                      |      |      |      |      |          |          |          |          |
|----------------|----------|--------------------------------------------------------------------------------------|------|------|------|------|----------|----------|----------|----------|
| NP_001027467.2 | STK24    | serine/threonine-protein kinase 24 isoform b precursor                               | 1.00 | 0.97 | 0.97 | 1.00 | 6.00E-01 | 4.94E-01 | 1.92E-01 | 9.08E-02 |
| NP_005611.1    | S100A11  | protein S100-A11                                                                     | 0.84 | 1.00 | 0.84 | 0.83 | 2.02E-04 | 3.76E-07 | 5.64E-02 | 7.42E-03 |
| NP_006136.1    | DNAJB1   | dnaJ homolog subfamily B member 1 isoform 1                                          | 0.95 | 1.05 | 1.00 | 0.95 | 4.35E-01 | 3.14E-01 | 3.36E-01 | 2.10E-01 |
| NP_037473.3    | OLA1     | obg-like ATPase 1 isoform 1                                                          | 1.03 | 1.04 | 1.08 | 1.02 | 4.91E-01 | 3.72E-01 | 7.80E-01 | 6.99E-01 |
| NP_001355024.1 | TGOLN2   | trans-Golgi network integral membrane protein 2 isoform 5 precursor                  | 0.60 | 1.03 | 0.62 | 0.84 | 2.44E-02 | 3.35E-03 | 4.43E-02 | 3.26E-03 |
| NP_002583.1    | PCNA     | proliferating cell nuclear antigen                                                   | 0.83 | 0.99 | 0.82 | 0.98 | 2.87E-03 | 5.95E-05 | 6.88E-02 | 1.27E-02 |
| NP_001306009.1 | HMG1     | high mobility group protein HMG-1/HMG-Y isoform c                                    | 1.17 | 0.78 | 0.90 | 1.08 | 4.38E-01 | 3.18E-01 | 1.81E-01 | 8.31E-02 |
| NP_001135452.1 | TP53BP1  | TP53-binding protein 1 isoform 1                                                     | 0.89 | 0.97 | 0.86 | 0.98 | 2.44E-02 | 3.34E-03 | 6.77E-02 | 1.22E-02 |
| NP_037522.1    | CEMIP2   | cell surface hyaluronidase isoform a                                                 | 1.00 | 0.97 | 0.97 | 1.06 | 8.27E-01 | 7.60E-01 | 2.89E-01 | 1.67E-01 |
| NP_001308032.1 | SLC4A7   | sodium bicarbonate cotransporter 3 isoform d                                         | 1.11 | 1.08 | 1.20 | 1.16 | 1.15E-01 | 4.90E-02 | 5.28E-01 | 4.05E-01 |
| NP_003818.2    | NAPA     | alpha-soluble NSF attachment protein                                                 | 0.95 | 1.03 | 0.98 | 1.00 | 2.82E-01 | 1.76E-01 | 3.59E-01 | 2.31E-01 |
| NP_115766.3    | NIFK     | MKI67 FHA domain-interacting nucleolar phosphoprotein                                | 0.98 | 0.98 | 0.95 | 1.03 | 2.36E-01 | 1.38E-01 | 9.78E-01 | 9.67E-01 |
| NP_110416.1    | HM13     | minor histocompatibility antigen H13 isoform 1                                       | 0.88 | 1.15 | 1.01 | 0.85 | 6.61E-02 | 2.11E-02 | 7.68E-02 | 1.63E-02 |
| NP_036333.2    | GLG1     | Golgi apparatus protein 1 isoform 1 precursor                                        | 0.89 | 0.98 | 0.87 | 1.04 | 2.30E-02 | 3.03E-03 | 1.41E-01 | 5.48E-02 |
| NP_001075.1    | PLOD3    | multifunctional procollagen lysine hydroxylase and glycosyltransferase LH3 precursor | 1.10 | 1.00 | 1.10 | 1.06 | 6.35E-02 | 1.98E-02 | 9.79E-02 | 2.82E-02 |
| NP_001357078.1 | CT45A3   | cancer/testis antigen family 45 member A3                                            | 0.92 | 0.99 | 0.91 | 0.98 | 8.63E-02 | 3.19E-02 | 1.13E-01 | 3.61E-02 |
| NP_001000.2    | RPS5     | 40S ribosomal protein S5                                                             | 1.01 | 1.09 | 1.10 | 0.95 | 7.12E-01 | 6.24E-01 | 8.25E-02 | 1.95E-02 |
| XP_016865009.1 | RPL26L1  | 60S ribosomal protein L26-like 1 isoform X1                                          | 0.83 | 1.09 | 0.90 | 0.92 | 1.93E-01 | 1.04E-01 | 1.87E-01 | 8.68E-02 |
| NP_036335.1    | GRHPR    | glyoxylate reductase/hydroxypyruvate reductase                                       | 1.04 | 1.03 | 1.06 | 1.09 | 8.27E-02 | 2.99E-02 | 3.35E-01 | 2.09E-01 |
| NP_001135757.1 | RPS24    | 40S ribosomal protein S24 isoform d                                                  | 1.02 | 0.98 | 1.00 | 0.97 | 3.68E-02 | 7.30E-03 | 1.41E-01 | 5.48E-02 |
| NP_057226.1    | HSD17B12 | very-long-chain 3-oxoacyl-CoA reductase                                              | 1.18 | 0.97 | 1.15 | 1.04 | 1.56E-02 | 1.47E-03 | 3.53E-02 | 1.74E-03 |
| NP_001243439.1 | SSBP1    | single-stranded DNA-binding protein, mitochondrial precursor                         | 1.03 | 0.97 | 1.01 | 0.98 | 3.47E-01 | 2.30E-01 | 1.88E-01 | 8.81E-02 |
| NP_291029.2    | LARP1    | la-related protein 1 isoform 2                                                       | 0.99 | 1.07 | 1.06 | 1.03 | 1.28E-01 | 5.81E-02 | 5.66E-02 | 7.49E-03 |
| NP_150241.2    | PML      | protein PML isoform 1                                                                | 1.04 | 0.97 | 1.01 | 1.05 | 1.07E-02 | 6.47E-04 | 1.42E-01 | 5.52E-02 |
| NP_001287848.1 | HMG1     | high mobility group protein HMGI-C isoform d                                         | 0.80 | 0.99 | 0.79 | 0.88 | 1.51E-02 | 1.40E-03 | 3.53E-02 | 1.66E-03 |
| NP_001026976.1 | ALDH3A2  | aldehyde dehydrogenase family 3 member A2 isoform 1                                  | 1.14 | 1.01 | 1.15 | 1.07 | 1.03E-02 | 5.56E-04 | 6.20E-02 | 9.79E-03 |
| NP_001354324.1 | WASH2C   | WASH complex subunit 2C isoform 7                                                    | 0.92 | 1.00 | 0.92 | 1.06 | 3.69E-01 | 2.52E-01 | 4.19E-01 | 2.92E-01 |
| XP_006724878.1 | HCFC1    | host cell factor 1 isoform X1                                                        | 1.04 | 0.99 | 1.03 | 1.01 | 4.07E-01 | 2.87E-01 | 4.89E-01 | 3.62E-01 |
| NP_001317692.1 | IDH3B    | isocitrate dehydrogenase [NAD] subunit beta, mitochondrial isoform e precursor       | 1.11 | 0.97 | 1.07 | 1.05 | 1.21E-01 | 5.36E-02 | 1.13E-01 | 3.64E-02 |
| NP_057366.2    | AK3      | GTP:AMP phosphotransferase AK3, mitochondrial isoform a                              | 1.11 | 1.04 | 1.15 | 1.12 | 9.76E-03 | 5.07E-04 | 4.37E-02 | 2.95E-03 |
| XP_016870505.1 | SET      | protein SET isoform X2                                                               | 0.71 | 1.03 | 0.73 | 0.78 | 2.92E-02 | 4.69E-03 | 4.78E-02 | 4.19E-03 |
| XP_024309320.1 | CTPS1    | CTP synthase 1 isoform X1                                                            | 1.19 | 0.89 | 1.06 | 1.05 | 4.41E-02 | 1.03E-02 | 7.04E-02 | 1.35E-02 |
| NP_000972.1    | RPL19    | 60S ribosomal protein L19 isoform 1                                                  | 0.98 | 1.01 | 0.98 | 0.94 | 1.15E-02 | 7.20E-04 | 2.12E-01 | 1.04E-01 |
| NP_003841.1    | SUCLA2   | succinate--CoA ligase [ADP-forming] subunit beta, mitochondrial precursor            | 1.09 | 0.94 | 1.02 | 1.01 | 2.61E-02 | 3.86E-03 | 4.43E-02 | 3.14E-03 |
| NP_852133.1    | EIF6     | eukaryotic translation initiation factor 6 isoform a                                 | 1.07 | 0.95 | 1.02 | 1.09 | 2.59E-02 | 3.73E-03 | 4.32E-02 | 2.75E-03 |
| NP_002779.1    | PSMA3    | proteasome subunit alpha type-3 isoform 1                                            | 1.08 | 0.99 | 1.07 | 1.04 | 1.68E-02 | 1.73E-03 | 4.79E-02 | 4.27E-03 |
| NP_057396.1    | WBP11    | WW domain-binding protein 11                                                         | 0.91 | 0.99 | 0.90 | 1.04 | 1.52E-01 | 7.42E-02 | 2.31E-01 | 1.19E-01 |
| NP_000984.1    | RPL31    | 60S ribosomal protein L31 isoform 1                                                  | 0.93 | 1.03 | 0.95 | 0.89 | 1.65E-01 | 8.40E-02 | 1.59E-01 | 6.72E-02 |
| NP_005558.1    | LGALS3BP | galectin-3-binding protein precursor                                                 | 0.75 | 1.02 | 0.76 | 1.01 | 5.39E-04 | 3.73E-06 | 3.45E-02 | 1.02E-03 |
| NP_789782.1    | CHMP4B   | charged multivesicular body protein 4b                                               | 0.92 | 1.06 | 0.97 | 1.08 | 1.26E-02 | 8.98E-04 | 4.32E-02 | 2.79E-03 |
| NP_004049.3    | CAPS     | calcyphosin isoform a                                                                | 0.73 | 0.90 | 0.65 | 0.62 | 2.43E-04 | 5.81E-07 | 3.38E-02 | 8.00E-04 |
| NP_001349757.1 | COMT     | catechol O-methyltransferase isoform MB-COMT                                         | 1.18 | 0.93 | 1.09 | 1.09 | 5.78E-02 | 1.71E-02 | 8.46E-02 | 2.06E-02 |
| NP_055481.1    | CLINT1   | clathrin interactor 1 isoform 2                                                      | 1.01 | 1.07 | 1.08 | 1.15 | 7.93E-01 | 7.20E-01 | 2.28E-01 | 1.16E-01 |
| NP_005521.1    | IDH3A    | isocitrate dehydrogenase [NAD] subunit alpha, mitochondrial precursor                | 1.08 | 0.96 | 1.04 | 1.03 | 3.41E-02 | 6.44E-03 | 6.88E-02 | 1.28E-02 |
| XP_005269298.1 | SART3    | squamous cell carcinoma antigen recognized by T-cells 3 isoform X1                   | 1.05 | 1.01 | 1.06 | 1.10 | 5.09E-02 | 1.36E-02 | 3.56E-01 | 2.28E-01 |
| NP_006784.1    | PRDX3    | thioredoxin-dependent peroxide reductase, mitochondrial isoform a precursor          | 1.06 | 0.89 | 0.95 | 1.02 | 1.17E-02 | 7.84E-04 | 2.60E-02 | 1.45E-04 |
| NP_071496.1    | EIF4H    | eukaryotic translation initiation factor 4H isoform 1                                | 0.85 | 1.02 | 0.87 | 0.99 | 4.05E-02 | 8.81E-03 | 8.57E-02 | 2.15E-02 |

|                |          |                                                                       |      |      |      |      |          |          |          |          |
|----------------|----------|-----------------------------------------------------------------------|------|------|------|------|----------|----------|----------|----------|
| NP_006102.2    | ACAA2    | 3-ketoacyl-CoA thiolase, mitochondrial                                | 1.05 | 1.06 | 1.12 | 1.03 | 1.68E-02 | 1.73E-03 | 3.33E-01 | 2.07E-01 |
| NP_003123.2    | SRM      | spermidine synthase                                                   | 1.11 | 0.93 | 1.03 | 1.07 | 9.88E-02 | 3.89E-02 | 7.20E-02 | 1.44E-02 |
| NP_009210.1    | U2AF2    | splicing factor U2AF 65 kDa subunit isoform a                         | 1.02 | 0.93 | 0.95 | 1.02 | 1.07E-02 | 6.36E-04 | 4.11E-02 | 2.49E-03 |
| NP_000089.1    | CPT2     | carnitine O-palmitoyltransferase 2, mitochondrial isoform 1 precursor | 1.08 | 0.97 | 1.04 | 1.07 | 4.90E-02 | 1.26E-02 | 8.72E-02 | 2.23E-02 |
| NP_001036143.1 | RHOC     | rho-related GTP-binding protein RhoC precursor                        | 1.07 | 0.96 | 1.03 | 0.90 | 7.09E-01 | 6.20E-01 | 5.73E-01 | 4.57E-01 |
| NP_002078.1    | GRN      | progranulin precursor                                                 | 0.74 | 0.94 | 0.69 | 1.01 | 1.25E-01 | 5.59E-02 | 1.97E-01 | 9.43E-02 |
| NP_115721.1    | PYMI     | partner of Y14 and mago isoform 1                                     | 0.87 | 1.00 | 0.87 | 1.17 | 3.39E-02 | 6.35E-03 | 1.89E-01 | 8.85E-02 |
| NP_004025.1    | ANXA7    | annexin A7 isoform 2                                                  | 1.12 | 0.95 | 1.06 | 1.06 | 1.51E-02 | 1.39E-03 | 3.38E-02 | 7.72E-04 |
| NP_009140.1    | RPL35    | 60S ribosomal protein L35                                             | 0.91 | 1.04 | 0.95 | 0.93 | 8.39E-03 | 3.87E-04 | 6.73E-02 | 1.20E-02 |
| NP_054861.2    | NUDT5    | ADP-sugar pyrophosphatase isoform 1                                   | 1.09 | 0.93 | 1.02 | 1.03 | 2.41E-01 | 1.42E-01 | 1.36E-01 | 5.14E-02 |
| NP_001317217.1 | SMARCC2  | SWI/SNF complex subunit SMARCC2 isoform d                             | 0.96 | 1.05 | 1.00 | 0.97 | 5.85E-01 | 4.75E-01 | 4.14E-01 | 2.86E-01 |
| NP_002892.1    | RCN1     | reticulocalbin-1 precursor                                            | 0.85 | 1.10 | 0.94 | 0.91 | 1.71E-03 | 2.06E-05 | 3.53E-02 | 1.50E-03 |
| NP_005029.1    | PPID     | peptidyl-prolyl cis-trans isomerase D                                 | 0.91 | 1.02 | 0.92 | 0.94 | 1.77E-01 | 9.22E-02 | 2.37E-01 | 1.23E-01 |
| NP_055975.1    | PMPCA    | mitochondrial-processing peptidase subunit alpha isoform 1 precursor  | 1.09 | 0.95 | 1.03 | 1.07 | 3.14E-02 | 5.36E-03 | 6.52E-02 | 1.08E-02 |
| NP_001289978.1 | MYL12A   | myosin regulatory light chain 12A isoform 2                           | 0.91 | 0.98 | 0.90 | 0.99 | 8.44E-02 | 3.08E-02 | 1.36E-01 | 5.07E-02 |
| NP_001684.2    | ATP6V1B2 | V-type proton ATPase subunit B, brain isoform                         | 1.13 | 1.03 | 1.16 | 1.08 | 2.89E-02 | 4.63E-03 | 1.94E-01 | 9.26E-02 |
| XP_016877576.1 | TMOD3    | tropomodulin-3 isoform X1                                             | 1.16 | 1.12 | 1.29 | 1.06 | 1.01E-01 | 4.06E-02 | 4.71E-01 | 3.44E-01 |
| NP_004730.2    | MTA2     | metastasis-associated protein MTA2 isoform 1                          | 1.01 | 0.95 | 0.96 | 1.00 | 2.93E-01 | 1.85E-01 | 5.18E-02 | 5.71E-03 |
| NP_620061.2    | PGK2     | phosphoglycerate kinase 2                                             | 1.01 | 1.04 | 1.05 | 1.10 | 8.99E-01 | 8.58E-01 | 7.69E-01 | 6.85E-01 |
| NP_067062.1    | RBM25    | RNA-binding protein 25                                                | 1.11 | 0.99 | 1.10 | 1.07 | 1.86E-02 | 2.04E-03 | 4.47E-02 | 3.42E-03 |
| NP_149073.1    | SARNP    | SAP domain-containing ribonucleoprotein                               | 0.84 | 1.04 | 0.87 | 1.00 | 4.65E-02 | 1.14E-02 | 6.05E-02 | 9.23E-03 |
| NP_001352526.1 | PRPF40A  | pre-mRNA-processing factor 40 homolog A isoform 5                     | 0.96 | 1.02 | 0.98 | 1.00 | 2.90E-01 | 1.83E-01 | 2.33E-01 | 1.20E-01 |
| NP_001337537.1 | SRSF11   | serine/arginine-rich splicing factor 11 isoform 3                     | 0.91 | 0.98 | 0.89 | 0.98 | 4.23E-02 | 9.51E-03 | 8.50E-02 | 2.10E-02 |
| NP_066952.1    | PPA1     | inorganic pyrophosphatase                                             | 1.06 | 1.01 | 1.06 | 1.06 | 2.21E-01 | 1.25E-01 | 4.65E-01 | 3.37E-01 |
| NP_066357.3    | RPL36A   | 60S ribosomal protein L36a                                            | 0.90 | 1.03 | 0.93 | 0.92 | 3.21E-02 | 5.65E-03 | 5.70E-02 | 7.70E-03 |
| XP_024304145.1 | DDX6     | probable ATP-dependent RNA helicase DDX6 isoform X1                   | 1.03 | 0.96 | 0.99 | 1.03 | 2.84E-01 | 1.77E-01 | 1.29E-01 | 4.64E-02 |
| NP_006793.1    | SF3A3    | splicing factor 3A subunit 3 isoform 1                                | 0.98 | 1.01 | 0.99 | 0.97 | 3.38E-01 | 2.22E-01 | 5.58E-01 | 4.35E-01 |
| XP_016868887.2 | EIF3E    | eukaryotic translation initiation factor 3 subunit E isoform X1       | 0.98 | 0.96 | 0.94 | 1.00 | 4.35E-01 | 3.15E-01 | 6.32E-01 | 5.20E-01 |
| NP_006074.2    | IK       | protein Red                                                           | 0.89 | 1.05 | 0.93 | 1.03 | 1.40E-01 | 6.62E-02 | 1.86E-01 | 8.67E-02 |
| NP_004956.5    | HMGN1    | non-histone chromosomal protein HMG-14                                | 0.81 | 1.03 | 0.84 | 0.95 | 4.02E-02 | 8.66E-03 | 5.35E-02 | 6.47E-03 |
| NP_056274.3    | ATL3     | atlastin-3 isoform 1                                                  | 1.06 | 0.99 | 1.04 | 1.04 | 5.66E-02 | 1.64E-02 | 1.92E-01 | 9.11E-02 |
| NP_000364.1    | UMPS     | uridine 5'-monophosphate synthase                                     | 1.06 | 0.97 | 1.03 | 1.01 | 1.29E-02 | 9.60E-04 | 3.31E-02 | 5.40E-04 |
| NP_055095.2    | DNAJC8   | dnaJ homolog subfamily C member 8                                     | 0.82 | 1.04 | 0.85 | 0.96 | 5.59E-03 | 1.84E-04 | 5.83E-02 | 8.36E-03 |
| NP_006100.2    | PRMT5    | protein arginine N-methyltransferase 5 isoform a                      | 1.08 | 0.98 | 1.06 | 1.05 | 1.62E-02 | 1.58E-03 | 3.45E-02 | 1.04E-03 |
| NP_002856.1    | RAB2A    | ras-related protein Rab-2A isoform a                                  | 1.23 | 0.87 | 1.07 | 1.09 | 4.18E-02 | 9.30E-03 | 8.02E-02 | 1.83E-02 |
| XP_016882662.1 | BSG      | basigin isoform X1                                                    | 1.01 | 0.99 | 0.99 | 1.05 | 8.20E-01 | 7.53E-01 | 6.22E-01 | 5.09E-01 |
| NP_000192.2    | ICAM1    | intercellular adhesion molecule 1 precursor                           | 0.93 | 0.94 | 0.87 | 1.04 | 1.74E-01 | 9.06E-02 | 9.79E-01 | 9.69E-01 |
| NP_001281269.1 | ZC3H18   | zinc finger CCCH domain-containing protein 18 isoform 1               | 0.83 | 1.03 | 0.86 | 0.92 | 4.87E-02 | 1.24E-02 | 6.81E-02 | 1.24E-02 |
| NP_114414.2    | EIF2A    | eukaryotic translation initiation factor 2A isoform 1                 | 1.10 | 0.91 | 0.99 | 1.09 | 5.25E-01 | 4.10E-01 | 4.35E-01 | 3.06E-01 |
| NP_056175.3    | MTRX     | exosome RNA helicase MTR4                                             | 0.98 | 0.96 | 0.94 | 1.04 | 3.66E-01 | 2.48E-01 | 6.48E-01 | 5.42E-01 |
| NP_065978.1    | VAT1L    | synaptic vesicle membrane protein VAT-1 homolog-like                  | 0.94 | 0.91 | 0.86 | 0.91 | 1.48E-01 | 7.16E-02 | 4.87E-01 | 3.60E-01 |
| NP_002789.1    | PSMB6    | proteasome subunit beta type-6 isoform 1 precursor                    | 1.10 | 0.99 | 1.09 | 1.05 | 1.04E-01 | 4.23E-02 | 1.15E-01 | 3.75E-02 |
| XP_005259353.1 | CAPNS1   | calpain small subunit 1 isoform X1                                    | 1.03 | 0.97 | 1.00 | 0.98 | 1.46E-01 | 7.02E-02 | 1.32E-01 | 4.81E-02 |
| NP_001166176.1 | EIF4G2   | eukaryotic translation initiation factor 4 gamma 2 isoform 1          | 1.05 | 0.93 | 0.98 | 0.99 | 3.81E-01 | 2.63E-01 | 1.70E-01 | 7.44E-02 |
| XP_016882478.1 | MAP2K2   | dual specificity mitogen-activated protein kinase kinase 2 isoform X1 | 1.09 | 0.98 | 1.07 | 1.06 | 2.55E-01 | 1.53E-01 | 2.90E-01 | 1.69E-01 |
| NP_005649.1    | TRAF1    | TNF receptor-associated factor 1 isoform a                            | 0.96 | 0.79 | 0.75 | 0.96 | 1.13E-01 | 4.82E-02 | 1.73E-01 | 7.64E-02 |
| NP_006640.2    | UTP14A   | U3 small nucleolar RNA-associated protein 14 homolog A isoform 1      | 0.91 | 1.00 | 0.91 | 0.98 | 1.39E-01 | 6.55E-02 | 1.59E-01 | 6.70E-02 |

|                |          |                                                                                 |      |      |      |      |          |          |          |          |
|----------------|----------|---------------------------------------------------------------------------------|------|------|------|------|----------|----------|----------|----------|
| XP_005245570.1 | ANP32E   | acidic leucine-rich nuclear phosphoprotein 32 family member E isoform X1        | 0.88 | 1.01 | 0.89 | 0.91 | 8.72E-02 | 3.24E-02 | 9.97E-02 | 2.92E-02 |
| NP_001078927.1 | CTNND1   | catenin delta-1 isoform 1ABC                                                    | 0.99 | 0.98 | 0.97 | 1.06 | 8.91E-02 | 3.36E-02 | 6.82E-01 | 5.80E-01 |
| NP_004452.1    | FARSA    | phenylalanine--tRNA ligase alpha subunit                                        | 1.00 | 0.98 | 0.98 | 0.99 | 9.74E-01 | 9.61E-01 | 7.74E-01 | 6.90E-01 |
| XP_016868589.1 | CTSB     | cathepsin B isoform X1                                                          | 0.85 | 0.94 | 0.80 | 0.93 | 1.26E-02 | 8.93E-04 | 4.33E-02 | 2.90E-03 |
| NP_919415.2    | VAPA     | vesicle-associated membrane protein-associated protein A isoform 2              | 1.13 | 1.03 | 1.16 | 1.01 | 5.72E-02 | 1.68E-02 | 1.15E-01 | 3.75E-02 |
| NP_057086.2    | SCCPDH   | saccharopine dehydrogenase-like oxidoreductase                                  | 1.13 | 1.02 | 1.15 | 1.11 | 1.36E-02 | 1.08E-03 | 5.35E-02 | 6.62E-03 |
| NP_060308.1    | NHP2     | H/ACA ribonucleoprotein complex subunit 2 isoform a                             | 0.95 | 0.94 | 0.89 | 1.05 | 5.64E-01 | 4.53E-01 | 9.35E-01 | 9.07E-01 |
| NP_001354702.1 | ESYT2    | extended synaptotagmin-2 isoform 1                                              | 1.18 | 0.94 | 1.11 | 1.12 | 1.08E-01 | 4.51E-02 | 9.00E-02 | 2.38E-02 |
| XP_024306762.1 | SLC25A11 | mitochondrial 2-oxoglutarate/malate carrier protein isoform X1                  | 1.11 | 0.97 | 1.08 | 1.08 | 5.70E-02 | 1.67E-02 | 7.18E-02 | 1.43E-02 |
| NP_001272972.1 | ACADM    | medium-chain specific acyl-CoA dehydrogenase, mitochondrial isoform d precursor | 1.12 | 0.99 | 1.10 | 1.08 | 8.10E-02 | 2.91E-02 | 1.58E-01 | 6.64E-02 |
| NP_073713.2    | CTBP2    | C-terminal-binding protein 2 isoform 2                                          | 0.99 | 1.00 | 0.99 | 1.04 | 3.69E-01 | 2.52E-01 | 6.98E-01 | 5.97E-01 |
| XP_011519406.1 | DNAJC3   | dnaJ homolog subfamily C member 3 isoform X1                                    | 1.15 | 1.06 | 1.23 | 1.08 | 8.60E-02 | 3.17E-02 | 3.23E-01 | 1.98E-01 |
| NP_219482.1    | ZNF622   | zinc finger protein 622                                                         | 1.03 | 1.08 | 1.11 | 1.08 | 1.22E-01 | 5.40E-02 | 1.20E-01 | 4.06E-02 |
| NP_659731.1    | MAP2K3   | dual specificity mitogen-activated protein kinase 3 isoform B                   | 1.21 | 1.01 | 1.22 | 1.21 | 3.89E-02 | 8.17E-03 | 7.93E-02 | 1.77E-02 |
| NP_937859.1    | SNRPB    | small nuclear ribonucleoprotein-associated proteins B and B' isoform B'         | 1.09 | 0.94 | 1.02 | 1.03 | 5.41E-02 | 1.53E-02 | 5.07E-02 | 5.28E-03 |
| NP_001357121.1 | IGBP1    | immunoglobulin-binding protein 1 isoform 1                                      | 0.96 | 1.02 | 0.98 | 1.00 | 5.95E-02 | 1.79E-02 | 2.16E-01 | 1.08E-01 |
| XP_005258027.1 | LIG3     | DNA ligase 3 isoform X1                                                         | 1.17 | 0.87 | 1.00 | 1.04 | 4.36E-01 | 3.15E-01 | 3.14E-01 | 1.90E-01 |
| XP_005273819.1 | CPT1A    | carnitine O-palmitoyltransferase 1, liver isoform isoform X1                    | 1.02 | 1.01 | 1.03 | 1.00 | 1.46E-01 | 7.05E-02 | 2.97E-01 | 1.75E-01 |
| NP_001317366.1 | PTPN11   | tyrosine-protein phosphatase non-receptor type 11 isoform 3                     | 0.99 | 1.03 | 1.02 | 0.99 | 4.68E-01 | 3.50E-01 | 2.85E-01 | 1.64E-01 |
| NP_064535.1    | SAR1A    | GTP-binding protein SAR1a                                                       | 1.10 | 0.99 | 1.08 | 0.97 | 1.46E-01 | 6.99E-02 | 1.54E-01 | 6.32E-02 |
| NP_003012.1    | SGTA     | small glutamine-rich tetratricopeptide repeat-containing protein alpha          | 0.88 | 1.04 | 0.92 | 0.95 | 4.91E-02 | 1.26E-02 | 5.79E-02 | 8.09E-03 |
| NP_004721.1    | ETF1     | eukaryotic peptide chain release factor subunit 1 isoform 1                     | 1.07 | 1.04 | 1.12 | 1.01 | 2.66E-01 | 1.62E-01 | 7.82E-01 | 7.02E-01 |
| NP_065823.1    | NUFIP2   | nuclear fragile X mental retardation-interacting protein 2                      | 1.00 | 1.01 | 1.00 | 1.06 | 9.52E-01 | 9.32E-01 | 8.99E-01 | 8.54E-01 |
| NP_077310.1    | TMEM43   | transmembrane protein 43                                                        | 1.15 | 0.91 | 1.05 | 1.13 | 4.23E-03 | 1.12E-04 | 3.31E-02 | 2.88E-04 |
| NP_001410.2    | ELAVL1   | ELAV-like protein 1                                                             | 1.02 | 0.98 | 1.00 | 0.94 | 3.44E-01 | 2.28E-01 | 1.76E-01 | 7.90E-02 |
| NP_001139699.1 | RPS20    | 40S ribosomal protein S20 isoform 1                                             | 0.98 | 1.05 | 1.03 | 0.96 | 6.91E-01 | 5.98E-01 | 3.54E-01 | 2.26E-01 |
| NP_005552.3    | LAMP1    | lysosome-associated membrane glycoprotein 1 precursor                           | 0.92 | 1.04 | 0.95 | 1.07 | 4.38E-02 | 1.02E-02 | 5.90E-02 | 8.57E-03 |
| XP_006711236.1 | BROX     | BRO1 domain-containing protein BROX isoform X3                                  | 1.10 | 0.96 | 1.05 | 1.04 | 4.14E-02 | 9.09E-03 | 5.61E-02 | 7.18E-03 |
| NP_006214.3    | PIN4     | peptidyl-prolyl cis-trans isomerase NIMA-interacting 4 isoform 1                | 0.85 | 1.13 | 0.96 | 0.99 | 4.92E-02 | 1.26E-02 | 4.79E-02 | 4.28E-03 |
| NP_001252525.1 | PFDN6    | prefoldin subunit 6                                                             | 1.01 | 1.01 | 1.02 | 1.10 | 2.46E-01 | 1.45E-01 | 9.77E-01 | 9.65E-01 |
| NP_001153408.1 | EBNA1BP2 | probable rRNA-processing protein EBP2 isoform 1                                 | 0.96 | 1.01 | 0.98 | 1.02 | 2.01E-01 | 1.11E-01 | 1.75E-01 | 7.86E-02 |
| NP_003115.1    | SPR      | sepiapterin reductase                                                           | 1.06 | 0.98 | 1.04 | 1.02 | 3.21E-01 | 2.08E-01 | 2.56E-01 | 1.39E-01 |
| NP_110437.2    | TXNDC5   | thioredoxin domain-containing protein 5 isoform 1 precursor                     | 0.98 | 1.04 | 1.02 | 0.98 | 5.01E-01 | 3.83E-01 | 2.31E-01 | 1.19E-01 |
| NP_003503.1    | H2AC6    | histone H2A type 1-C                                                            | 1.14 | 0.97 | 1.10 | 0.84 | 7.58E-02 | 2.61E-02 | 1.21E-01 | 4.14E-02 |
| NP_036457.1    | MAPRE1   | microtubule-associated protein RP/EB family member 1                            | 1.03 | 1.01 | 1.04 | 1.04 | 6.69E-01 | 5.72E-01 | 7.64E-01 | 6.80E-01 |
| NP_005076.3    | NUP214   | nuclear pore complex protein Nup214 isoform 2                                   | 0.93 | 1.09 | 1.01 | 0.95 | 5.19E-02 | 1.42E-02 | 7.88E-02 | 1.74E-02 |
| NP_909122.1    | RBM39    | RNA-binding protein 39 isoform a                                                | 1.03 | 0.97 | 1.00 | 0.97 | 1.16E-02 | 7.34E-04 | 7.83E-02 | 1.69E-02 |
| NP_000908.2    | P4HA1    | prolyl 4-hydroxylase subunit alpha-1 isoform 1 precursor                        | 0.93 | 1.12 | 1.04 | 1.21 | 1.44E-01 | 6.90E-02 | 8.02E-02 | 1.85E-02 |
| NP_006127.1    | CAPZA2   | F-actin-capping protein subunit alpha-2                                         | 1.02 | 1.01 | 1.03 | 1.09 | 6.02E-01 | 4.96E-01 | 8.19E-01 | 7.47E-01 |
| NP_001274069.1 | TPD52    | tumor protein D52 isoform 4                                                     | 1.02 | 1.00 | 1.02 | 1.05 | 5.07E-01 | 3.91E-01 | 5.24E-01 | 4.00E-01 |
| NP_004729.1    | VAPB     | vesicle-associated membrane protein-associated protein B/C isoform 1            | 1.15 | 1.07 | 1.23 | 1.12 | 1.45E-02 | 1.24E-03 | 9.42E-02 | 2.65E-02 |
| XP_011528279.1 | ADSL     | adenylosuccinate lyase isoform X1                                               | 1.07 | 0.99 | 1.06 | 0.99 | 9.99E-02 | 3.97E-02 | 1.15E-01 | 3.79E-02 |
| NP_001032248.1 | ACOT9    | acyl-coenzyme A thioesterase 9, mitochondrial isoform a precursor               | 1.13 | 0.96 | 1.08 | 1.06 | 3.39E-02 | 6.34E-03 | 1.47E-01 | 5.85E-02 |
| XP_011512636.1 | SERPINB1 | leukocyte elastase inhibitor isoform X1                                         | 1.04 | 0.96 | 1.00 | 1.05 | 6.70E-02 | 2.15E-02 | 8.09E-02 | 1.87E-02 |
| NP_001245321.1 | CLPB     | caseinolytic peptidase B protein homolog isoform 2                              | 1.03 | 0.99 | 1.02 | 1.02 | 3.70E-02 | 7.42E-03 | 1.14E-01 | 3.71E-02 |
| NP_002678.3    | PNN      | pinin                                                                           | 1.00 | 0.96 | 0.96 | 1.00 | 9.93E-01 | 9.92E-01 | 4.88E-01 | 3.62E-01 |
| NP_001137325.1 | PYMI     | partner of Y14 and mago isoform 2                                               | 0.84 | 1.03 | 0.87 | 1.01 | 4.44E-03 | 1.20E-04 | 4.67E-02 | 3.98E-03 |



|                |            |                                                                               |      |      |      |      |          |          |          |          |
|----------------|------------|-------------------------------------------------------------------------------|------|------|------|------|----------|----------|----------|----------|
| NP_001015.1    | RPS21      | 40S ribosomal protein S21                                                     | 0.90 | 0.99 | 0.89 | 0.99 | 5.97E-02 | 1.80E-02 | 9.67E-02 | 2.76E-02 |
| NP_055983.1    | ZC3H4      | zinc finger CCCH domain-containing protein 4                                  | 0.90 | 0.96 | 0.86 | 1.07 | 6.67E-02 | 2.13E-02 | 4.80E-01 | 3.53E-01 |
| NP_001159583.1 | PNPLA6     | neuropathy target esterase isoform a                                          | 1.14 | 0.98 | 1.11 | 1.04 | 2.08E-01 | 1.16E-01 | 1.87E-01 | 8.73E-02 |
| NP_258412.1    | ITPA       | inosine triphosphate pyrophosphatase isoform a                                | 1.15 | 0.89 | 1.02 | 1.12 | 9.67E-02 | 3.76E-02 | 6.65E-02 | 1.15E-02 |
| NP_001185798.1 | CAPN1      | calpain-1 catalytic subunit                                                   | 1.09 | 0.97 | 1.06 | 1.03 | 2.44E-02 | 3.34E-03 | 4.11E-02 | 2.51E-03 |
| NP_036590.1    | TIMM13     | mitochondrial import inner membrane translocase subunit Tim13                 | 0.98 | 0.94 | 0.92 | 1.20 | 5.49E-02 | 1.57E-02 | 9.22E-02 | 2.54E-02 |
| NP_001307812.1 | DYNC1I2    | cytoplasmic dynein 1 intermediate chain 2 isoform 5                           | 1.08 | 1.04 | 1.13 | 1.02 | 4.47E-02 | 1.06E-02 | 2.42E-01 | 1.27E-01 |
| NP_001180298.1 | DIDO1      | death-inducer obliterator 1 isoform c                                         | 0.94 | 0.96 | 0.90 | 1.01 | 2.03E-01 | 1.12E-01 | 5.79E-01 | 4.63E-01 |
| NP_000966.2    | RPL11      | 60S ribosomal protein L11 isoform 1                                           | 1.08 | 0.96 | 1.04 | 1.08 | 2.38E-01 | 1.39E-01 | 1.68E-01 | 7.24E-02 |
| NP_004926.1    | CDK5       | cyclin-dependent-like kinase 5 isoform 1                                      | 1.08 | 0.93 | 1.01 | 0.97 | 2.30E-01 | 1.33E-01 | 1.25E-01 | 4.39E-02 |
| NP_005990.1    | TSNAX      | translin-associated protein X                                                 | 1.05 | 0.94 | 0.98 | 1.03 | 1.59E-01 | 7.97E-02 | 8.35E-02 | 1.99E-02 |
| NP_001189414.1 | HSPE1-MOB4 | HSPE1-MOB4 protein                                                            | 1.10 | 0.91 | 1.00 | 1.03 | 1.18E-01 | 5.15E-02 | 8.65E-02 | 2.20E-02 |
| NP_127492.1    | GTF2I      | general transcription factor II-I isoform 1                                   | 0.92 | 0.94 | 0.86 | 1.03 | 3.54E-02 | 6.80E-03 | 5.12E-01 | 3.89E-01 |
| NP_001248763.1 | TBRG4      | FAST kinase domain-containing protein 4 isoform 3                             | 1.04 | 1.02 | 1.07 | 1.07 | 1.90E-01 | 1.02E-01 | 6.61E-01 | 5.55E-01 |
| NP_056451.3    | EIF2B4     | translation initiation factor eIF-2B subunit delta isoform 3                  | 1.00 | 1.06 | 1.06 | 1.02 | 9.27E-01 | 8.94E-01 | 3.59E-01 | 2.31E-01 |
| NP_597709.3    | RAVER1     | ribonucleoprotein PTB-binding 1 isoform 1                                     | 1.00 | 1.03 | 1.03 | 1.00 | 9.55E-01 | 9.36E-01 | 4.75E-01 | 3.48E-01 |
| NP_003081.2    | SNRPA1     | U2 small nuclear ribonucleoprotein A'                                         | 1.05 | 1.01 | 1.06 | 0.93 | 3.64E-01 | 2.46E-01 | 5.09E-01 | 3.84E-01 |
| NP_003095.2    | SORD       | sorbitol dehydrogenase                                                        | 1.12 | 1.00 | 1.12 | 1.08 | 1.21E-02 | 8.37E-04 | 3.80E-02 | 2.13E-03 |
| NP_001303249.1 | PLOD1      | procollagen-lysine,2-oxoglutarate 5-dioxygenase 1 isoform 1 precursor         | 0.95 | 1.07 | 1.02 | 1.12 | 1.49E-01 | 7.25E-02 | 1.25E-01 | 4.38E-02 |
| NP_002801.1    | PSMD4      | 26S proteasome non-ATPase regulatory subunit 4 isoform 2                      | 0.98 | 1.01 | 0.99 | 1.00 | 4.35E-01 | 3.15E-01 | 3.08E-01 | 1.85E-01 |
| NP_005848.2    | ZMPSTE24   | CAAX prenyl protease 1 homolog                                                | 1.13 | 0.92 | 1.04 | 0.97 | 1.65E-02 | 1.64E-03 | 4.84E-02 | 4.39E-03 |
| XP_005253288.1 | CD44       | CD44 antigen isoform X1                                                       | 0.89 | 1.06 | 0.95 | 0.97 | 4.83E-02 | 1.23E-02 | 5.70E-02 | 7.68E-03 |
| XP_016868076.1 | ZYX        | zyxin isoform X1                                                              | 0.94 | 1.06 | 1.00 | 1.18 | 4.18E-02 | 9.28E-03 | 1.35E-01 | 5.04E-02 |
| NP_037481.1    | NENF       | neudesin precursor                                                            | 0.79 | 1.12 | 0.88 | 0.96 | 1.66E-02 | 1.68E-03 | 3.53E-02 | 1.27E-03 |
| NP_071896.8    | NOC3L      | nucleolar complex protein 3 homolog                                           | 1.12 | 0.99 | 1.11 | 1.03 | 1.19E-01 | 5.21E-02 | 1.29E-01 | 4.66E-02 |
| XP_006712034.1 | EHBP1      | EH domain-binding protein 1 isoform X4                                        | 0.90 | 0.99 | 0.88 | 0.98 | 1.07E-01 | 4.44E-02 | 1.57E-01 | 6.55E-02 |
| NP_001303963.1 | DPM1       | dolichol-phosphate mannosyltransferase subunit 1 isoform 1                    | 1.09 | 1.05 | 1.15 | 0.96 | 3.90E-02 | 8.30E-03 | 2.87E-01 | 1.66E-01 |
| NP_066972.1    | COTL1      | coactosin-like protein                                                        | 1.01 | 1.04 | 1.05 | 1.02 | 1.87E-01 | 1.00E-01 | 8.24E-02 | 1.93E-02 |
| NP_001186731.1 | RPL11      | 60S ribosomal protein L11 isoform 2                                           | 1.07 | 0.99 | 1.06 | 0.98 | 3.17E-02 | 5.45E-03 | 5.66E-02 | 7.51E-03 |
| XP_011516450.1 | SMC2       | structural maintenance of chromosomes protein 2 isoform X1                    | 0.96 | 0.99 | 0.95 | 1.03 | 7.07E-02 | 2.32E-02 | 5.65E-01 | 4.45E-01 |
| NP_001212.2    | CAMK2D     | calcium/calmodulin-dependent protein kinase type II subunit delta isoform 3   | 1.16 | 0.97 | 1.13 | 1.06 | 5.35E-02 | 1.49E-02 | 6.90E-02 | 1.30E-02 |
| NP_073568.2    | NUCKS1     | nuclear ubiquitous casein and cyclin-dependent kinase substrate 1             | 0.78 | 1.02 | 0.79 | 0.91 | 4.23E-04 | 1.80E-06 | 1.80E-02 | 5.97E-05 |
| NP_060697.4    | UBA6       | ubiquitin-like modifier-activating enzyme 6                                   | 1.07 | 1.00 | 1.07 | 1.06 | 2.94E-02 | 4.79E-03 | 5.18E-02 | 5.75E-03 |
| XP_024304079.1 | ENAH       | protein enabled homolog isoform X11                                           | 0.99 | 0.95 | 0.95 | 0.94 | 8.20E-01 | 7.53E-01 | 3.64E-01 | 2.35E-01 |
| XP_016879600.1 | DDX42      | ATP-dependent RNA helicase DDX42 isoform X1                                   | 1.07 | 0.93 | 0.99 | 1.06 | 7.87E-02 | 2.74E-02 | 5.35E-02 | 6.51E-03 |
| NP_036265.3    | COPG2      | coatamer subunit gamma-2 isoform 1                                            | 1.13 | 0.92 | 1.05 | 1.01 | 7.53E-02 | 2.57E-02 | 6.25E-02 | 9.94E-03 |
| NP_000149.4    | GBE1       | 1,4-alpha-glucan-branching enzyme                                             | 0.95 | 1.04 | 0.99 | 0.95 | 5.54E-01 | 4.42E-01 | 3.66E-01 | 2.38E-01 |
| NP_002328.1    | LRPAP1     | alpha-2-macroglobulin receptor-associated protein precursor                   | 0.86 | 1.04 | 0.90 | 0.92 | 4.15E-02 | 9.17E-03 | 5.13E-02 | 5.53E-03 |
| NP_001295155.1 | RPS15      | 40S ribosomal protein S15 isoform 1                                           | 0.98 | 1.03 | 1.01 | 0.97 | 1.07E-01 | 4.40E-02 | 8.65E-02 | 2.20E-02 |
| NP_003007.2    | SRSF2      | serine/arginine-rich splicing factor 2                                        | 0.83 | 0.98 | 0.81 | 0.94 | 1.29E-02 | 9.63E-04 | 3.53E-02 | 1.62E-03 |
| NP_071415.1    | MCCC2      | methylcrotonoyl-CoA carboxylase beta chain, mitochondrial isoform 1 precursor | 1.07 | 0.95 | 1.02 | 1.06 | 2.43E-02 | 3.33E-03 | 3.62E-02 | 1.83E-03 |
| XP_011515392.1 | RMDN1      | regulator of microtubule dynamics protein 1 isoform X1                        | 1.05 | 0.92 | 0.96 | 1.11 | 3.62E-01 | 2.44E-01 | 1.35E-01 | 5.01E-02 |
| NP_060679.1    | ARFGAP1    | ADP-ribosylation factor GTPase-activating protein 1 isoform a                 | 1.03 | 1.07 | 1.10 | 1.05 | 1.73E-01 | 8.95E-02 | 4.13E-01 | 2.85E-01 |
| NP_036243.1    | AHSA1      | activator of 90 kDa heat shock protein ATPase homolog 1 isoform 1             | 1.06 | 0.98 | 1.04 | 1.03 | 3.11E-02 | 5.24E-03 | 4.43E-02 | 3.22E-03 |
| NP_006444.2    | TBL3       | transducin beta-like protein 3                                                | 1.00 | 0.98 | 0.99 | 1.05 | 9.75E-01 | 9.63E-01 | 7.75E-01 | 6.93E-01 |
| NP_000990.1    | RPL38      | 60S ribosomal protein L38                                                     | 1.07 | 0.96 | 1.03 | 1.02 | 6.94E-05 | 3.69E-08 | 2.09E-03 | 1.11E-06 |
| NP_057122.2    | SBDS       | ribosome maturation protein SBDS                                              | 1.15 | 0.96 | 1.10 | 1.05 | 4.68E-03 | 1.32E-04 | 3.31E-02 | 5.98E-04 |

|                |          |                                                                                                                             |      |      |      |      |          |          |          |          |
|----------------|----------|-----------------------------------------------------------------------------------------------------------------------------|------|------|------|------|----------|----------|----------|----------|
| NP_001123917.1 | ITPRID2  | protein ITPRID2 isoform 1                                                                                                   | 0.92 | 0.95 | 0.87 | 0.97 | 7.39E-02 | 2.48E-02 | 2.61E-01 | 1.43E-01 |
| NP_005660.4    | REEP5    | receptor expression-enhancing protein 5                                                                                     | 1.13 | 1.02 | 1.15 | 1.05 | 3.39E-02 | 6.37E-03 | 5.95E-02 | 8.77E-03 |
| NP_055484.3    | NUP93    | nuclear pore complex protein Nup93 isoform 1                                                                                | 1.17 | 0.92 | 1.07 | 1.03 | 2.39E-02 | 3.25E-03 | 4.11E-02 | 2.51E-03 |
| NP_821067.1    | PTPA     | serine/threonine-protein phosphatase 2A activator isoform b                                                                 | 1.03 | 1.00 | 1.03 | 1.06 | 8.33E-01 | 7.68E-01 | 8.58E-01 | 8.01E-01 |
| NP_002861.1    | RAB13    | ras-related protein Rab-13 isoform 1                                                                                        | 1.03 | 0.93 | 0.96 | 1.02 | 2.26E-01 | 1.29E-01 | 1.15E-01 | 3.75E-02 |
| NP_001029288.1 | EIF2B4   | translation initiation factor eIF-2B subunit delta isoform 2                                                                | 1.62 | 0.56 | 0.90 | 1.02 | 2.93E-02 | 4.73E-03 | 8.25E-02 | 1.95E-02 |
| NP_073572.2    | ACBD3    | Golgi resident protein GCP60                                                                                                | 1.00 | 0.99 | 0.99 | 1.12 | 9.51E-01 | 9.30E-01 | 4.28E-01 | 3.00E-01 |
| NP_001336865.1 | TOR1AIP2 | torsin-1A-interacting protein 2 isoform b                                                                                   | 0.98 | 1.07 | 1.05 | 1.05 | 1.05E-01 | 4.28E-02 | 1.70E-01 | 7.44E-02 |
| NP_005650.2    | UFD1     | ubiquitin recognition factor in ER-associated degradation protein 1 isoform A                                               | 1.08 | 0.95 | 1.03 | 1.06 | 3.35E-04 | 9.80E-07 | 3.53E-02 | 1.66E-03 |
| XP_016876581.1 | FKBP3    | peptidyl-prolyl cis-trans isomerase FKBP3 isoform X1                                                                        | 0.95 | 1.00 | 0.95 | 1.05 | 2.26E-02 | 2.90E-03 | 5.31E-02 | 6.11E-03 |
| NP_001120683.1 | SHTN1    | shootin-1 isoform a                                                                                                         | 0.99 | 1.00 | 1.00 | 1.04 | 9.26E-01 | 8.92E-01 | 9.00E-01 | 8.57E-01 |
| XP_016863417.1 | PDS5A    | sister chromatid cohesion protein PDS5 homolog A isoform X1                                                                 | 1.05 | 0.94 | 0.98 | 0.99 | 3.76E-01 | 2.58E-01 | 2.32E-01 | 1.19E-01 |
| NP_689419.3    | SNX6     | sorting nexin-6 isoform b                                                                                                   | 1.04 | 1.00 | 1.04 | 1.04 | 1.77E-01 | 9.23E-02 | 4.11E-01 | 2.83E-01 |
| NP_001003701.1 | ATP5PF   | ATP synthase-coupling factor 6, mitochondrial isoform b precursor                                                           | 0.84 | 1.00 | 0.84 | 0.96 | 1.16E-02 | 7.41E-04 | 3.80E-02 | 2.16E-03 |
| NP_004716.1    | BUB3     | mitotic checkpoint protein BUB3 isoform a                                                                                   | 1.07 | 0.94 | 1.00 | 1.02 | 7.76E-02 | 2.69E-02 | 5.83E-02 | 8.34E-03 |
| XP_005256438.1 | PYCR1    | pyrroline-5-carboxylate reductase 1, mitochondrial isoform X1                                                               | 1.06 | 1.00 | 1.07 | 1.06 | 2.34E-01 | 1.35E-01 | 4.00E-01 | 2.70E-01 |
| NP_008974.5    | KRR1     | KRR1 small subunit processome component homolog                                                                             | 1.01 | 1.00 | 1.01 | 1.02 | 1.42E-01 | 6.73E-02 | 6.49E-01 | 5.42E-01 |
| NP_006344.1    | HMGN4    | high mobility group nucleosome-binding domain-containing protein 4                                                          | 0.84 | 1.05 | 0.88 | 0.95 | 3.21E-02 | 5.65E-03 | 5.40E-02 | 6.79E-03 |
| NP_004159.2    | SDHA     | succinate dehydrogenase [ubiquinone] flavoprotein subunit, mitochondrial isoform 1                                          | 1.06 | 0.97 | 1.03 | 1.06 | 1.11E-01 | 4.67E-02 | 8.48E-02 | 2.09E-02 |
| NP_055545.1    | MLEC     | malectin isoform 1 precursor                                                                                                | 1.16 | 0.91 | 1.05 | 1.09 | 1.50E-02 | 1.34E-03 | 3.53E-02 | 1.54E-03 |
| NP_003760.1    | SRSF9    | serine/arginine-rich splicing factor 9                                                                                      | 0.82 | 1.03 | 0.84 | 0.93 | 1.16E-02 | 7.64E-04 | 4.43E-02 | 3.19E-03 |
| NP_002194.2    | ITGA2    | integrin alpha-2 precursor                                                                                                  | 0.94 | 1.01 | 0.95 | 0.94 | 2.99E-01 | 1.90E-01 | 4.61E-01 | 3.33E-01 |
| NP_001138350.1 | IMPA1    | inositol monophosphatase 1 isoform 2                                                                                        | 1.13 | 1.00 | 1.12 | 1.03 | 1.33E-01 | 6.13E-02 | 1.52E-01 | 6.16E-02 |
| XP_024306631.1 | RPA1     | replication protein A 70 kDa DNA-binding subunit isoform X1                                                                 | 1.07 | 0.97 | 1.04 | 1.03 | 3.87E-02 | 8.04E-03 | 6.02E-02 | 9.14E-03 |
| NP_002097.1    | H2AZ1    | histone H2A.Z                                                                                                               | 0.88 | 1.14 | 1.01 | 1.05 | 1.03E-02 | 5.69E-04 | 6.60E-02 | 1.11E-02 |
| XP_005248207.1 | BOD1L1   | biorientation of chromosomes in cell division protein 1-like 1 isoform X3                                                   | 0.78 | 1.02 | 0.80 | 0.91 | 4.24E-02 | 9.63E-03 | 7.88E-02 | 1.75E-02 |
| NP_001349769.1 | ACO1     | cytoplasmic aconitate hydratase                                                                                             | 1.02 | 1.00 | 1.02 | 1.09 | 8.59E-01 | 8.02E-01 | 9.14E-01 | 8.75E-01 |
| NP_001014972.1 | ZNF638   | zinc finger protein 638 isoform 1                                                                                           | 0.89 | 1.02 | 0.90 | 1.01 | 1.33E-01 | 6.15E-02 | 1.34E-01 | 4.96E-02 |
| NP_631961.1    | TAF15    | TATA-binding protein-associated factor 2N isoform 1                                                                         | 0.68 | 1.14 | 0.77 | 0.85 | 4.12E-03 | 1.05E-04 | 3.31E-02 | 4.98E-04 |
| NP_055385.3    | ARFGAP3  | ADP-ribosylation factor GTPase-activating protein 3 isoform 1                                                               | 1.02 | 0.95 | 0.97 | 1.04 | 2.48E-01 | 1.47E-01 | 1.38E-01 | 5.26E-02 |
| NP_003482.1    | NAA10    | N-alpha-acetyltransferase 10 isoform 1                                                                                      | 1.03 | 0.95 | 0.98 | 1.08 | 1.84E-02 | 2.01E-03 | 2.86E-01 | 1.65E-01 |
| NP_001598.1    | ACAA1    | 3-ketoacyl-CoA thiolase, peroxisomal isoform a                                                                              | 1.04 | 1.00 | 1.04 | 1.05 | 9.83E-02 | 3.85E-02 | 1.27E-01 | 4.50E-02 |
| NP_003592.3    | SMARCA5  | SWI/SNF-related matrix-associated actin-dependent regulator of chromatin subfamily A member 5                               | 1.01 | 0.94 | 0.95 | 0.97 | 5.54E-01 | 4.41E-01 | 2.31E-01 | 1.19E-01 |
| NP_057475.2    | NOP16    | nucleolar protein 16 isoform 3                                                                                              | 0.87 | 1.03 | 0.90 | 0.97 | 6.04E-02 | 1.83E-02 | 8.47E-02 | 2.08E-02 |
| NP_002563.1    | PAFAH1B2 | platelet-activating factor acetylhydrolase IB subunit beta isoform a                                                        | 1.07 | 1.15 | 1.23 | 1.04 | 4.36E-01 | 3.15E-01 | 4.47E-01 | 3.18E-01 |
| NP_001356319.1 | PRKAR1A  | cAMP-dependent protein kinase type I-alpha regulatory subunit isoform a                                                     | 0.74 | 1.01 | 0.75 | 1.06 | 1.71E-03 | 2.06E-05 | 2.72E-02 | 1.62E-04 |
| NP_001358960.1 | DLAT     | dihydropolyllysine-residue acetyltransferase component of pyruvate dehydrogenase complex, mitochondrial isoform 1 precursor | 1.14 | 0.97 | 1.11 | 1.07 | 3.59E-02 | 6.94E-03 | 5.23E-02 | 5.97E-03 |
| NP_036561.1    | SEC14L2  | SEC14-like protein 2 isoform 1                                                                                              | 1.03 | 1.00 | 1.03 | 1.02 | 3.16E-01 | 2.04E-01 | 3.30E-01 | 2.05E-01 |
| NP_001026854.1 | SRSF7    | serine/arginine-rich splicing factor 7 isoform 1                                                                            | 0.84 | 0.98 | 0.83 | 0.89 | 4.87E-02 | 1.24E-02 | 7.77E-02 | 1.66E-02 |
| XP_011522203.1 | PAFAH1B1 | platelet-activating factor acetylhydrolase IB subunit alpha isoform X1                                                      | 1.16 | 0.89 | 1.03 | 1.08 | 4.46E-02 | 1.05E-02 | 7.88E-02 | 1.75E-02 |
| NP_005266.2    | GNL1     | guanine nucleotide-binding protein-like 1                                                                                   | 1.08 | 0.98 | 1.06 | 1.05 | 5.66E-02 | 1.64E-02 | 8.25E-02 | 1.94E-02 |
| XP_011531797.1 | DHX30    | ATP-dependent RNA helicase DHX30 isoform X4                                                                                 | 1.05 | 0.96 | 1.01 | 1.06 | 1.67E-01 | 8.49E-02 | 1.75E-01 | 7.86E-02 |
| NP_002815.3    | PTMS     | parathyrosin isoform 2                                                                                                      | 0.74 | 1.02 | 0.76 | 0.88 | 2.60E-02 | 3.77E-03 | 4.43E-02 | 3.26E-03 |
| NP_001288160.1 | HMGB3    | high mobility group protein B3 isoform b                                                                                    | 0.87 | 1.01 | 0.87 | 0.93 | 8.91E-02 | 3.35E-02 | 1.04E-01 | 3.15E-02 |
| NP_000150.1    | GCDH     | glutaryl-CoA dehydrogenase, mitochondrial isoform a precursor                                                               | 1.09 | 1.02 | 1.11 | 1.12 | 1.03E-01 | 4.18E-02 | 1.74E-01 | 7.70E-02 |
| NP_001243463.1 | SLC25A1  | tricarboxylate transport protein, mitochondrial isoform b                                                                   | 1.09 | 1.01 | 1.10 | 1.08 | 6.22E-02 | 1.90E-02 | 1.25E-01 | 4.37E-02 |

|                |          |                                                                                |      |      |      |      |          |          |          |          |
|----------------|----------|--------------------------------------------------------------------------------|------|------|------|------|----------|----------|----------|----------|
| NP_067653.4    | C12orf10 | UPF0160 protein MYG1, mitochondrial precursor                                  | 1.06 | 0.99 | 1.06 | 1.01 | 2.66E-02 | 3.96E-03 | 4.43E-02 | 3.11E-03 |
| NP_057152.2    | FIS1     | mitochondrial fission 1 protein                                                | 0.98 | 0.96 | 0.95 | 1.03 | 5.93E-01 | 4.86E-01 | 4.82E-01 | 3.56E-01 |
| XP_011536075.1 | PTGES3   | prostaglandin E synthase 3 isoform X3                                          | 0.98 | 0.94 | 0.93 | 1.07 | 3.14E-01 | 2.03E-01 | 3.36E-01 | 2.10E-01 |
| NP_009194.2    | COPE     | coatamer subunit epsilon isoform a                                             | 0.96 | 0.95 | 0.92 | 1.02 | 4.45E-01 | 3.25E-01 | 8.86E-01 | 8.37E-01 |
| NP_001129507.1 | TRMT1    | tRNA (guanine(26)-N(2))-dimethyltransferase isoform 1                          | 1.08 | 0.95 | 1.02 | 1.06 | 4.88E-01 | 3.70E-01 | 4.00E-01 | 2.71E-01 |
| NP_001001563.2 | TIMM50   | mitochondrial import inner membrane translocase subunit TIM50 isoform 1        | 1.01 | 0.97 | 0.98 | 1.05 | 3.77E-02 | 7.65E-03 | 1.36E-01 | 5.10E-02 |
| XP_024308560.1 | ERLEC1   | endoplasmic reticulum lectin 1 isoform X1                                      | 1.10 | 0.93 | 1.03 | 1.09 | 2.76E-02 | 4.23E-03 | 8.83E-02 | 2.29E-02 |
| XP_016871676.1 | IDE      | insulin-degrading enzyme isoform X1                                            | 1.18 | 0.93 | 1.10 | 1.09 | 4.02E-02 | 8.70E-03 | 9.44E-02 | 2.68E-02 |
| NP_036377.1    | SNW1     | SNW domain-containing protein 1 isoform 2                                      | 0.97 | 1.04 | 1.01 | 1.05 | 3.28E-01 | 2.14E-01 | 1.59E-01 | 6.68E-02 |
| NP_006699.2    | GLO1     | lactoylglutathione lyase                                                       | 0.94 | 0.99 | 0.93 | 1.00 | 1.72E-01 | 8.86E-02 | 2.65E-01 | 1.47E-01 |
| NP_002736.3    | MAPK1    | mitogen-activated protein kinase 1                                             | 1.01 | 0.97 | 0.98 | 1.01 | 7.48E-02 | 2.55E-02 | 8.74E-02 | 2.25E-02 |
| XP_011531289.1 | EIF2AK2  | interferon-induced, double-stranded RNA-activated protein kinase isoform X1    | 1.11 | 0.97 | 1.08 | 1.02 | 1.14E-01 | 4.87E-02 | 1.15E-01 | 3.77E-02 |
| NP_001186558.1 | MYL6B    | myosin light chain 6B                                                          | 0.95 | 0.97 | 0.92 | 0.98 | 4.07E-01 | 2.87E-01 | 7.78E-01 | 6.97E-01 |
| NP_004688.2    | PRPF4    | U4/U6 small nuclear ribonucleoprotein Prp4 isoform 1                           | 0.79 | 1.63 | 1.27 | 0.78 | 1.78E-01 | 9.27E-02 | 1.27E-01 | 4.53E-02 |
| NP_001530.1    | DNAJA1   | dnaJ homolog subfamily A member 1 isoform 1                                    | 1.00 | 0.95 | 0.94 | 1.02 | 9.77E-01 | 9.66E-01 | 6.11E-01 | 4.97E-01 |
| NP_000973.2    | RPL21    | 60S ribosomal protein L21                                                      | 0.99 | 1.03 | 1.02 | 0.97 | 8.72E-01 | 8.19E-01 | 5.65E-01 | 4.45E-01 |
| NP_001276978.1 | USO1     | general vesicular transport factor p115 isoform 1                              | 1.07 | 1.04 | 1.11 | 1.06 | 5.09E-02 | 1.35E-02 | 7.05E-01 | 6.04E-01 |
| NP_620305.2    | SON      | protein SON isoform F                                                          | 0.94 | 1.02 | 0.95 | 0.98 | 1.66E-02 | 1.65E-03 | 3.80E-02 | 2.15E-03 |
| NP_003744.1    | EIF3D    | eukaryotic translation initiation factor 3 subunit D                           | 1.00 | 0.96 | 0.96 | 1.00 | 9.79E-01 | 9.69E-01 | 1.04E-01 | 3.13E-02 |
| NP_005601.1    | RBBP4    | histone-binding protein RBBP4 isoform a                                        | 0.92 | 0.94 | 0.86 | 0.99 | 2.12E-02 | 2.64E-03 | 1.70E-01 | 7.46E-02 |
| XP_016875546.1 | PPF1BP1  | liprin-beta-1 isoform X1                                                       | 1.02 | 0.90 | 0.92 | 1.03 | 6.87E-01 | 5.93E-01 | 1.91E-01 | 9.00E-02 |
| NP_658985.2    | NAXE     | NAD(P)H-hydrate epimerase precursor                                            | 1.07 | 1.00 | 1.06 | 1.00 | 4.78E-01 | 3.61E-01 | 5.65E-01 | 4.45E-01 |
| NP_001230175.1 | P3H1     | prolyl 3-hydroxylase 1 isoform 3 precursor                                     | 1.03 | 1.02 | 1.05 | 1.07 | 1.51E-01 | 7.38E-02 | 5.68E-01 | 4.52E-01 |
| XP_011515883.1 | ELOC     | elongin-C isoform X1                                                           | 0.95 | 0.97 | 0.91 | 0.97 | 7.18E-02 | 2.37E-02 | 2.38E-01 | 1.25E-01 |
| XP_005273935.1 | EML3     | echinoderm microtubule-associated protein-like 3 isoform X6                    | 0.99 | 0.94 | 0.93 | 1.02 | 7.89E-01 | 7.15E-01 | 4.11E-01 | 2.82E-01 |
| NP_004090.4    | STOM     | erythrocyte band 7 integral membrane protein isoform a                         | 0.92 | 1.05 | 0.97 | 1.08 | 1.60E-01 | 7.99E-02 | 1.21E-01 | 4.17E-02 |
| XP_016868899.1 | PRPF4B   | serine/threonine-protein kinase PRP4 homolog isoform X1                        | 1.08 | 1.06 | 1.15 | 1.06 | 4.44E-02 | 1.04E-02 | 2.15E-01 | 1.07E-01 |
| NP_001350.1    | DECR1    | 2,4-dienoyl-CoA reductase, mitochondrial isoform 1 precursor                   | 0.92 | 1.07 | 0.99 | 1.00 | 1.03E-01 | 4.18E-02 | 1.20E-01 | 4.06E-02 |
| NP_004542.1    | NDUFS3   | NADH dehydrogenase [ubiquinone] iron-sulfur protein 3, mitochondrial precursor | 1.09 | 0.97 | 1.06 | 1.04 | 4.38E-02 | 1.02E-02 | 8.14E-02 | 1.90E-02 |
| NP_612434.1    | C12orf57 | protein C10 isoform 1                                                          | 0.74 | 1.00 | 0.74 | 0.91 | 6.12E-03 | 2.15E-04 | 3.53E-02 | 1.70E-03 |
| NP_001231855.1 | PRPF4    | U4/U6 small nuclear ribonucleoprotein Prp4 isoform 2                           | 1.03 | 0.98 | 1.00 | 1.08 | 2.80E-03 | 5.42E-05 | 1.88E-01 | 8.76E-02 |
| XP_016880446.1 | SHMT1    | serine hydroxymethyltransferase, cytosolic isoform X1                          | 0.94 | 1.04 | 0.99 | 1.08 | 3.73E-02 | 7.55E-03 | 1.10E-01 | 3.46E-02 |
| NP_006397.1    | PRDX4    | peroxiredoxin-4 precursor                                                      | 1.04 | 1.03 | 1.07 | 1.05 | 1.18E-02 | 8.05E-04 | 1.69E-01 | 7.38E-02 |
| NP_612398.2    | FAM114A1 | protein NOXP20 isoform 1                                                       | 0.97 | 1.08 | 1.04 | 1.06 | 3.54E-02 | 6.80E-03 | 9.03E-02 | 2.42E-02 |
| NP_001333694.1 | MYO18A   | unconventional myosin-XVIIIa isoform c                                         | 1.09 | 0.98 | 1.07 | 1.11 | 1.14E-02 | 7.09E-04 | 1.58E-01 | 6.59E-02 |
| NP_002347.5    | MARCKS   | myristoylated alanine-rich C-kinase substrate                                  | 0.81 | 1.09 | 0.89 | 1.07 | 4.32E-02 | 9.92E-03 | 5.01E-02 | 5.10E-03 |
| NP_000628.2    | GSR      | glutathione reductase, mitochondrial isoform 1 precursor                       | 1.01 | 1.01 | 1.02 | 1.08 | 3.76E-01 | 2.58E-01 | 8.65E-01 | 8.11E-01 |
| NP_001306000.1 | SACMIL   | phosphatidylinositide phosphatase SAC1 isoform 1x                              | 1.09 | 0.94 | 1.02 | 1.04 | 1.84E-01 | 9.74E-02 | 1.14E-01 | 3.71E-02 |
| NP_001037.1    | SLC12A2  | solute carrier family 12 member 2 isoform 1                                    | 1.00 | 0.97 | 0.95 | 1.17 | 9.51E-01 | 9.30E-01 | 9.16E-01 | 8.78E-01 |
| NP_008872.1    | SOX10    | transcription factor SOX-10                                                    | 0.89 | 0.97 | 0.86 | 0.99 | 4.24E-02 | 9.56E-03 | 1.76E-01 | 7.91E-02 |
| XP_005257584.1 | CCDC47   | coiled-coil domain-containing protein 47 isoform X1                            | 1.01 | 1.03 | 1.04 | 0.99 | 7.38E-01 | 6.54E-01 | 4.41E-01 | 3.12E-01 |
| XP_016856355.1 | TARDBP   | TAR DNA-binding protein 43 isoform X1                                          | 1.16 | 0.92 | 1.06 | 1.08 | 5.18E-02 | 1.42E-02 | 5.67E-02 | 7.54E-03 |
| NP_002613.2    | PFND1    | prefoldin subunit 1                                                            | 0.89 | 1.02 | 0.91 | 1.01 | 1.97E-02 | 2.31E-03 | 3.53E-02 | 1.64E-03 |
| NP_065872.1    | VPS13C   | vacuolar protein sorting-associated protein 13C isoform 2A                     | 1.14 | 0.88 | 0.99 | 1.10 | 3.92E-01 | 2.72E-01 | 4.16E-01 | 2.88E-01 |
| NP_001340173.1 | FAM49B   | protein FAM49B isoform 1                                                       | 1.08 | 1.03 | 1.11 | 1.05 | 5.79E-02 | 1.71E-02 | 2.90E-01 | 1.69E-01 |
| NP_001743.1    | CAT      | catalase                                                                       | 1.07 | 1.06 | 1.13 | 1.11 | 5.64E-02 | 1.62E-02 | 9.65E-01 | 9.50E-01 |
| XP_005267041.2 | LAMA4    | laminin subunit alpha-4 isoform X1                                             | 0.80 | 0.88 | 0.70 | 0.86 | 2.86E-02 | 4.50E-03 | 1.15E-01 | 3.76E-02 |

|                |          |                                                                           |      |      |      |      |          |          |          |          |
|----------------|----------|---------------------------------------------------------------------------|------|------|------|------|----------|----------|----------|----------|
| NP_689413.1    | SNX5     | sorting nexin-5 isoform a                                                 | 0.96 | 1.01 | 0.97 | 1.02 | 1.18E-01 | 5.09E-02 | 1.91E-01 | 9.05E-02 |
| NP_004851.2    | FXR2     | fragile X mental retardation syndrome-related protein 2                   | 1.05 | 0.97 | 1.01 | 0.99 | 8.87E-02 | 3.32E-02 | 1.76E-01 | 7.91E-02 |
| NP_060598.3    | TSR1     | pre-rRNA-processing protein TSR1 homolog                                  | 1.05 | 0.95 | 1.00 | 1.03 | 1.06E-01 | 4.35E-02 | 6.88E-02 | 1.28E-02 |
| NP_001273677.1 | MRPS27   | 28S ribosomal protein S27, mitochondrial isoform 1                        | 1.03 | 0.99 | 1.02 | 1.02 | 5.14E-02 | 1.39E-02 | 7.21E-02 | 1.47E-02 |
| NP_149100.2    | PNPT1    | polyribonucleotide nucleotidyltransferase 1, mitochondrial precursor      | 1.01 | 0.99 | 1.01 | 1.02 | 3.30E-01 | 2.16E-01 | 4.18E-01 | 2.91E-01 |
| NP_065080.1    | LZTFL1   | leucine zipper transcription factor-like protein 1 isoform 1              | 0.98 | 0.99 | 0.97 | 1.09 | 7.40E-02 | 2.49E-02 | 3.01E-01 | 1.78E-01 |
| NP_008977.1    | EMILIN1  | EMILIN-1                                                                  | 1.04 | 1.00 | 1.05 | 1.09 | 3.66E-01 | 2.48E-01 | 4.02E-01 | 2.72E-01 |
| NP_001124313.1 | RTCA     | RNA 3'-terminal phosphate cyclase isoform a                               | 1.05 | 1.05 | 1.10 | 1.01 | 8.02E-02 | 2.84E-02 | 9.70E-01 | 9.55E-01 |
| NP_004517.2    | MCM2     | DNA replication licensing factor MCM2                                     | 0.89 | 0.96 | 0.85 | 0.97 | 4.80E-02 | 1.21E-02 | 2.04E-01 | 9.96E-02 |
| NP_054768.2    | ACAD9    | complex I assembly factor ACAD9, mitochondrial                            | 1.12 | 0.91 | 1.01 | 1.10 | 2.29E-01 | 1.32E-01 | 1.68E-01 | 7.31E-02 |
| NP_001165131.1 | CYB5R3   | NADH-cytochrome b5 reductase 3 isoform 3                                  | 1.09 | 0.97 | 1.06 | 1.05 | 4.79E-02 | 1.20E-02 | 7.16E-02 | 1.40E-02 |
| NP_037518.3    | SLC25A24 | calcium-binding mitochondrial carrier protein SCaMC-1 isoform 1           | 1.14 | 1.12 | 1.27 | 1.09 | 9.04E-03 | 4.42E-04 | 7.93E-01 | 7.16E-01 |
| NP_055629.1    | PSMD6    | 26S proteasome non-ATPase regulatory subunit 6 isoform 2                  | 1.01 | 1.05 | 1.06 | 1.01 | 8.44E-01 | 7.82E-01 | 5.97E-01 | 4.82E-01 |
| NP_006266.2    | SRSF6    | serine/arginine-rich splicing factor 6                                    | 0.85 | 1.03 | 0.88 | 0.92 | 4.86E-02 | 1.24E-02 | 6.70E-02 | 1.18E-02 |
| XP_016863193.1 | ADD1     | alpha-adducin isoform X2                                                  | 1.03 | 1.13 | 1.16 | 1.15 | 4.65E-01 | 3.47E-01 | 1.63E-01 | 6.99E-02 |
| NP_003124.1    | SRP9     | signal recognition particle 9 kDa protein isoform 2                       | 0.80 | 1.01 | 0.81 | 0.92 | 3.27E-02 | 5.85E-03 | 5.34E-02 | 6.31E-03 |
| XP_011516801.1 | GAPVD1   | GTPase-activating protein and VPS9 domain-containing protein 1 isoform X1 | 1.11 | 0.94 | 1.04 | 1.05 | 1.00E-01 | 3.99E-02 | 7.88E-02 | 1.74E-02 |
| NP_001229766.1 | AP2A2    | AP-2 complex subunit alpha-2 isoform 1                                    | 1.01 | 0.97 | 0.97 | 1.03 | 4.62E-01 | 3.44E-01 | 4.11E-01 | 2.82E-01 |
| NP_002787.2    | PSMB4    | proteasome subunit beta type-4                                            | 1.18 | 0.92 | 1.09 | 1.07 | 1.15E-01 | 4.90E-02 | 1.14E-01 | 3.71E-02 |
| NP_067038.1    | RPRD1B   | regulation of nuclear pre-mRNA domain-containing protein 1B               | 0.92 | 1.04 | 0.96 | 1.02 | 2.86E-02 | 4.48E-03 | 4.55E-02 | 3.75E-03 |
| XP_016874792.1 | LRP1     | prolow-density lipoprotein receptor-related protein 1 isoform X1          | 1.03 | 0.98 | 1.01 | 1.03 | 7.37E-01 | 6.52E-01 | 5.97E-01 | 4.82E-01 |
| NP_055615.8    | ELMO1    | engulfment and cell motility protein 1 isoform 1                          | 1.09 | 0.88 | 0.96 | 1.04 | 2.36E-01 | 1.38E-01 | 1.84E-01 | 8.46E-02 |
| NP_055144.3    | EDC4     | enhancer of mRNA-decapping protein 4                                      | 1.00 | 1.01 | 1.01 | 1.02 | 9.87E-01 | 9.82E-01 | 9.84E-01 | 9.78E-01 |
| NP_000261.2    | PNP      | purine nucleoside phosphorylase                                           | 1.16 | 0.89 | 1.03 | 1.05 | 1.02E-01 | 4.09E-02 | 9.79E-02 | 2.82E-02 |
| NP_002887.2    | RBM4     | RNA-binding protein 4 isoform 1                                           | 0.95 | 0.97 | 0.92 | 1.05 | 7.30E-02 | 2.43E-02 | 1.88E-01 | 8.76E-02 |
| NP_002261.3    | TNPO1    | transportin-1 isoform 1                                                   | 1.16 | 1.00 | 1.15 | 1.02 | 5.07E-02 | 1.33E-02 | 7.04E-02 | 1.36E-02 |
| NP_001310991.1 | MIA3     | transport and Golgi organization protein 1 homolog isoform 3 precursor    | 0.99 | 1.03 | 1.01 | 1.06 | 6.92E-01 | 5.99E-01 | 3.50E-01 | 2.23E-01 |
| NP_055118.1    | PES1     | pescadillo homolog isoform 1                                              | 0.96 | 1.01 | 0.97 | 1.05 | 3.00E-01 | 1.91E-01 | 2.43E-01 | 1.29E-01 |
| NP_003013.1    | SH3BGL   | SH3 domain-binding glutamic acid-rich-like protein                        | 0.79 | 1.09 | 0.86 | 0.92 | 7.97E-03 | 3.52E-04 | 3.31E-02 | 3.97E-04 |
| XP_024307098.1 | ILVBL    | acetolactate synthase-like protein isoform X1                             | 1.11 | 0.97 | 1.07 | 1.05 | 3.00E-01 | 1.91E-01 | 2.59E-01 | 1.41E-01 |
| NP_057368.3    | CNOT1    | CCR4-NOT transcription complex subunit 1 isoform a                        | 0.99 | 0.97 | 0.96 | 1.05 | 7.41E-01 | 6.58E-01 | 6.04E-01 | 4.90E-01 |
| NP_076956.1    | GGCT     | gamma-glutamylcyclotransferase isoform 1                                  | 1.11 | 0.89 | 0.99 | 1.10 | 4.78E-02 | 1.19E-02 | 7.88E-02 | 1.73E-02 |
| NP_996925.1    | ENSA     | alpha-endosulfine isoform 1                                               | 0.81 | 1.12 | 0.90 | 0.96 | 5.49E-02 | 1.56E-02 | 7.02E-02 | 1.34E-02 |
| NP_005943.1    | MTIX     | metallothionein-IX                                                        | 0.50 | 0.94 | 0.47 | 1.02 | 2.02E-02 | 2.41E-03 | 7.49E-02 | 1.56E-02 |
| XP_016878207.1 | USP8     | ubiquitin carboxyl-terminal hydrolase 8 isoform X2                        | 0.99 | 1.01 | 1.00 | 1.03 | 5.12E-01 | 3.96E-01 | 3.00E-01 | 1.78E-01 |
| NP_001171634.2 | HADH     | hydroxyacyl-coenzyme A dehydrogenase, mitochondrial isoform 1 precursor   | 0.99 | 1.05 | 1.03 | 1.03 | 4.55E-01 | 3.36E-01 | 1.09E-01 | 3.40E-02 |
| NP_057569.2    | VTA1     | vacuolar protein sorting-associated protein VTA1 homolog isoform a        | 1.10 | 0.96 | 1.06 | 1.05 | 6.94E-05 | 2.40E-08 | 5.01E-02 | 5.14E-03 |
| NP_002884.1    | RBBP7    | histone-binding protein RBBP7 isoform 2                                   | 0.95 | 0.94 | 0.89 | 1.01 | 1.66E-01 | 8.46E-02 | 6.58E-01 | 5.52E-01 |
| NP_037520.1    | PREB     | prolactin regulatory element-binding protein isoform 1                    | 1.11 | 1.00 | 1.12 | 1.03 | 2.47E-01 | 1.46E-01 | 3.72E-01 | 2.44E-01 |
| NP_001021.1    | RPS27    | 40S ribosomal protein S27 isoform 1                                       | 1.08 | 0.93 | 1.00 | 1.02 | 3.67E-02 | 7.27E-03 | 4.79E-02 | 4.31E-03 |
| NP_000512.2    | HEXB     | beta-hexosaminidase subunit beta isoform 1                                | 0.97 | 0.96 | 0.93 | 1.08 | 6.55E-01 | 5.57E-01 | 9.43E-01 | 9.17E-01 |
| NP_002426.1    | MPI      | mannose-6-phosphate isomerase isoform 1                                   | 1.00 | 0.99 | 0.99 | 1.07 | 9.57E-01 | 9.39E-01 | 8.64E-01 | 8.10E-01 |
| NP_004955.2    | HDAC1    | histone deacetylase 1                                                     | 0.93 | 0.88 | 0.83 | 0.99 | 1.91E-01 | 1.02E-01 | 2.72E-01 | 1.53E-01 |
| NP_001185769.1 | RBM12    | RNA-binding protein 12                                                    | 1.01 | 0.98 | 0.99 | 1.01 | 6.38E-01 | 5.37E-01 | 3.00E-01 | 1.78E-01 |
| NP_003016.1    | SH3GL1   | endophilin-A2 isoform 1                                                   | 0.97 | 1.01 | 0.98 | 0.98 | 2.87E-01 | 1.80E-01 | 4.02E-01 | 2.73E-01 |
| NP_002957.1    | S100A10  | protein S100-A10                                                          | 0.82 | 1.14 | 0.94 | 0.77 | 1.50E-01 | 7.29E-02 | 1.05E-01 | 3.20E-02 |
| XP_005272318.1 | CTBP1    | C-terminal-binding protein 1 isoform X1                                   | 0.98 | 0.96 | 0.94 | 0.95 | 1.38E-01 | 6.42E-02 | 6.48E-01 | 5.40E-01 |

|                |          |                                                                     |      |      |      |      |          |          |          |          |
|----------------|----------|---------------------------------------------------------------------|------|------|------|------|----------|----------|----------|----------|
| NP_037460.2    | PYCR2    | pyrroline-5-carboxylate reductase 2 isoform 1                       | 1.14 | 1.02 | 1.16 | 1.11 | 4.78E-02 | 1.18E-02 | 9.44E-02 | 2.68E-02 |
| NP_001853.2    | COX5B    | cytochrome c oxidase subunit 5B, mitochondrial precursor            | 0.87 | 1.04 | 0.91 | 1.10 | 1.04E-01 | 4.21E-02 | 9.38E-02 | 2.63E-02 |
| NP_001350464.1 | HARS2    | probable histidine--tRNA ligase, mitochondrial isoform 4 precursor  | 1.11 | 1.03 | 1.14 | 1.09 | 3.51E-01 | 2.34E-01 | 5.11E-01 | 3.87E-01 |
| NP_001357903.1 | LARP7    | la-related protein 7 isoform 3                                      | 1.01 | 1.00 | 1.00 | 1.00 | 9.41E-01 | 9.15E-01 | 9.00E-01 | 8.57E-01 |
| NP_002070.1    | GOT1     | aspartate aminotransferase, cytoplasmic                             | 1.12 | 1.12 | 1.25 | 1.10 | 2.67E-02 | 4.04E-03 | 9.22E-01 | 8.87E-01 |
| NP_001026897.1 | MR1      | methylthioribose-1-phosphate isomerase isoform 1                    | 1.11 | 1.00 | 1.10 | 1.06 | 1.48E-03 | 1.53E-05 | 9.07E-02 | 2.45E-02 |
| NP_002940.2    | MRPL12   | 39S ribosomal protein L12, mitochondrial                            | 0.92 | 1.03 | 0.94 | 1.04 | 5.33E-02 | 1.48E-02 | 6.60E-02 | 1.13E-02 |
| NP_006750.3    | UGP2     | UTP--glucose-1-phosphate uridylyltransferase isoform a              | 1.12 | 1.00 | 1.13 | 1.07 | 1.43E-02 | 1.17E-03 | 5.72E-02 | 7.77E-03 |
| NP_001350617.1 | NPC2     | NPC intracellular cholesterol transporter 2 isoform 1 precursor     | 0.87 | 0.99 | 0.86 | 1.10 | 3.32E-02 | 5.96E-03 | 1.56E-01 | 6.51E-02 |
| XP_005264389.2 | MSH2     | DNA mismatch repair protein Msh2 isoform X1                         | 1.05 | 0.92 | 0.97 | 0.99 | 4.14E-02 | 9.07E-03 | 5.35E-02 | 6.44E-03 |
| XP_011512974.1 | SERPINB6 | serpin B6 isoform X1                                                | 1.11 | 0.87 | 0.96 | 1.03 | 1.16E-01 | 4.97E-02 | 7.93E-02 | 1.77E-02 |
| NP_057267.2    | MRT04    | mRNA turnover protein 4 homolog                                     | 1.03 | 0.96 | 0.98 | 1.13 | 7.36E-01 | 6.50E-01 | 4.62E-01 | 3.34E-01 |
| NP_001304889.1 | XRN2     | 5'-3' exoribonuclease 2 isoform 1                                   | 1.05 | 1.04 | 1.09 | 1.01 | 3.43E-01 | 2.27E-01 | 8.94E-01 | 8.47E-01 |
| NP_000987.2    | RPL35A   | 60S ribosomal protein L35a                                          | 1.13 | 0.89 | 1.01 | 1.03 | 1.93E-01 | 1.04E-01 | 1.19E-01 | 4.01E-02 |
| NP_995314.1    | NCKAP1   | nck-associated protein 1 isoform 2                                  | 1.01 | 0.97 | 0.97 | 0.98 | 9.11E-01 | 8.73E-01 | 4.69E-01 | 3.42E-01 |
| NP_060695.2    | SMU1     | WD40 repeat-containing protein SMU1                                 | 1.10 | 0.95 | 1.04 | 1.05 | 1.84E-01 | 9.72E-02 | 1.48E-01 | 5.90E-02 |
| XP_011529087.1 | PAGE2B   | putative G antigen family E member 3 isoform X1                     | 0.51 | 1.36 | 0.70 | 0.70 | 1.57E-02 | 1.49E-03 | 3.38E-02 | 7.83E-04 |
| NP_001309774.1 | EFL1     | elongation factor-like GTPase 1 isoform 1                           | 1.04 | 1.08 | 1.13 | 1.04 | 5.07E-01 | 3.91E-01 | 4.79E-01 | 3.53E-01 |
| NP_612451.1    | CCDC124  | coiled-coil domain-containing protein 124                           | 0.85 | 1.03 | 0.87 | 0.98 | 9.47E-03 | 4.78E-04 | 3.38E-02 | 6.74E-04 |
| NP_001027454.1 | TMPO     | thymopoietin isoform beta                                           | 1.07 | 0.99 | 1.05 | 0.96 | 3.68E-01 | 2.50E-01 | 3.16E-01 | 1.92E-01 |
| XP_016878181.1 | SNAP23   | synaptosomal-associated protein 23 isoform X1                       | 0.95 | 0.98 | 0.93 | 0.97 | 3.75E-01 | 2.57E-01 | 5.48E-01 | 4.26E-01 |
| NP_296374.1    | RPL34    | 60S ribosomal protein L34                                           | 1.09 | 0.92 | 1.00 | 1.03 | 7.24E-02 | 2.41E-02 | 5.35E-02 | 6.58E-03 |
| NP_001518.3    | HDAC2    | histone deacetylase 2                                               | 1.04 | 0.90 | 0.94 | 1.04 | 2.53E-01 | 1.51E-01 | 9.04E-02 | 2.42E-02 |
| XP_024306246.1 | RHOT2    | mitochondrial Rho GTPase 2 isoform X1                               | 1.10 | 0.97 | 1.07 | 1.01 | 1.17E-02 | 7.70E-04 | 3.31E-02 | 4.54E-04 |
| XP_016873208.1 | RHOG     | rho-related GTP-binding protein RhoG isoform X1                     | 1.11 | 1.00 | 1.11 | 1.03 | 8.33E-02 | 3.02E-02 | 1.07E-01 | 3.29E-02 |
| XP_016880484.1 | UBTF     | nucleolar transcription factor 1 isoform X1                         | 0.90 | 1.02 | 0.92 | 0.99 | 3.79E-02 | 7.73E-03 | 1.25E-01 | 4.35E-02 |
| NP_078772.1    | IRF2BPL  | probable E3 ubiquitin-protein ligase IRF2BPL                        | 0.95 | 1.01 | 0.96 | 1.14 | 2.64E-01 | 1.61E-01 | 2.47E-01 | 1.31E-01 |
| NP_003668.2    | DENR     | density-regulated protein                                           | 0.96 | 1.00 | 0.96 | 0.96 | 5.88E-02 | 1.75E-02 | 1.26E-01 | 4.44E-02 |
| NP_003121.1    | SRI      | sorcin isoform A                                                    | 1.00 | 1.03 | 1.03 | 1.00 | 8.71E-01 | 8.17E-01 | 2.96E-01 | 1.74E-01 |
| NP_055844.2    | POP1     | ribonucleases P/MRP protein subunit POP1                            | 0.95 | 0.98 | 0.93 | 0.95 | 6.14E-01 | 5.09E-01 | 7.91E-01 | 7.14E-01 |
| NP_001008217.1 | GALE     | UDP-glucose 4-epimerase                                             | 1.25 | 0.84 | 1.04 | 1.08 | 2.16E-01 | 1.21E-01 | 1.78E-01 | 8.07E-02 |
| NP_001248332.1 | NFKB2    | nuclear factor NF-kappa-B p100 subunit isoform b                    | 0.99 | 1.01 | 1.00 | 1.00 | 6.96E-01 | 6.05E-01 | 5.21E-01 | 3.97E-01 |
| NP_060289.2    | TRMT10C  | tRNA methyltransferase 10 homolog C precursor                       | 1.11 | 0.94 | 1.05 | 1.06 | 2.99E-02 | 4.91E-03 | 8.83E-02 | 2.30E-02 |
| NP_000970.1    | RPL18    | 60S ribosomal protein L18 isoform 1                                 | 1.13 | 0.89 | 1.01 | 0.95 | 3.16E-02 | 5.42E-03 | 4.55E-02 | 3.66E-03 |
| NP_001311045.1 | UAP1     | UDP-N-acetylhexosamine pyrophosphorylase isoform b                  | 1.00 | 0.91 | 0.90 | 1.03 | 8.82E-01 | 8.36E-01 | 1.27E-01 | 4.48E-02 |
| NP_001760.1    | CD9      | CD9 antigen isoform 1                                               | 1.07 | 1.02 | 1.09 | 1.02 | 3.21E-01 | 2.08E-01 | 4.82E-01 | 3.56E-01 |
| XP_011512318.2 | RAI14    | ankycorbin isoform X1                                               | 1.03 | 0.97 | 1.00 | 1.02 | 2.56E-01 | 1.54E-01 | 1.94E-01 | 9.21E-02 |
| NP_004699.1    | PDCD5    | programmed cell death protein 5                                     | 0.73 | 1.13 | 0.83 | 0.88 | 6.29E-03 | 2.31E-04 | 2.60E-02 | 1.36E-04 |
| NP_079087.3    | CPSF7    | cleavage and polyadenylation specificity factor subunit 7 isoform 1 | 0.98 | 0.97 | 0.95 | 1.02 | 8.00E-02 | 2.81E-02 | 9.14E-01 | 8.76E-01 |
| XP_006713535.1 | TFG      | protein TFG isoform X1                                              | 0.99 | 1.00 | 0.99 | 1.00 | 6.97E-01 | 6.07E-01 | 8.39E-01 | 7.74E-01 |
| XP_005258572.1 | IRGQ     | immunity-related GTPase family Q protein isoform X1                 | 0.83 | 1.09 | 0.90 | 0.91 | 2.27E-02 | 2.94E-03 | 4.43E-02 | 3.25E-03 |
| NP_066403.2    | H3C14    | histone H3.2                                                        | 0.99 | 1.02 | 1.01 | 1.18 | 1.97E-01 | 1.08E-01 | 9.77E-01 | 9.65E-01 |
| NP_004346.1    | CD74     | HLA class II histocompatibility antigen gamma chain isoform b       | 0.77 | 0.87 | 0.67 | 1.04 | 3.21E-02 | 5.63E-03 | 9.79E-02 | 2.82E-02 |
| NP_001679.2    | ATP5PB   | ATP synthase F(0) complex subunit B1, mitochondrial precursor       | 1.11 | 0.95 | 1.06 | 1.06 | 1.18E-02 | 8.08E-04 | 3.80E-02 | 2.14E-03 |
| NP_006087.2    | NDRG1    | protein NDRG1 isoform 1                                             | 1.00 | 1.13 | 1.12 | 1.30 | 9.43E-01 | 9.20E-01 | 3.15E-01 | 1.91E-01 |
| NP_056143.1    | AHCYL2   | adenosylhomocysteinase 3 isoform a                                  | 1.02 | 1.03 | 1.05 | 1.06 | 8.07E-01 | 7.38E-01 | 9.19E-01 | 8.83E-01 |
| NP_001229820.1 | CSDE1    | cold shock domain-containing protein E1 isoform 4                   | 0.90 | 0.94 | 0.85 | 0.99 | 9.91E-02 | 3.92E-02 | 3.58E-01 | 2.30E-01 |

|                |           |                                                                                   |      |      |      |      |          |          |          |          |
|----------------|-----------|-----------------------------------------------------------------------------------|------|------|------|------|----------|----------|----------|----------|
| NP_055955.1    | TLL12     | tubulin-tyrosine ligase-like protein 12                                           | 1.13 | 1.01 | 1.14 | 1.04 | 1.05E-01 | 4.33E-02 | 1.96E-01 | 9.37E-02 |
| NP_077003.1    | CCDC86    | coiled-coil domain-containing protein 86                                          | 0.82 | 1.06 | 0.87 | 0.97 | 1.30E-01 | 5.89E-02 | 1.36E-01 | 5.12E-02 |
| XP_005274379.1 | PICALM    | phosphatidylinositol-binding clathrin assembly protein isoform X1                 | 1.00 | 1.02 | 1.02 | 1.06 | 9.44E-01 | 9.20E-01 | 7.63E-01 | 6.78E-01 |
| NP_000992.1    | RPL36AP42 | 60S ribosomal protein L36a-like                                                   | 0.88 | 1.03 | 0.91 | 0.98 | 1.22E-02 | 8.45E-04 | 5.15E-02 | 5.56E-03 |
| NP_004887.2    | VPS26A    | vacuolar protein sorting-associated protein 26A isoform 1                         | 0.97 | 0.97 | 0.94 | 1.02 | 2.29E-01 | 1.32E-01 | 9.11E-01 | 8.69E-01 |
| NP_853553.1    | AUP1      | ancient ubiquitous protein 1                                                      | 1.09 | 0.94 | 1.02 | 1.06 | 1.75E-01 | 9.14E-02 | 1.55E-01 | 6.36E-02 |
| NP_004472.1    | GALNT2    | polypeptide N-acetylgalactosaminyltransferase 2 precursor                         | 1.00 | 0.99 | 0.99 | 1.04 | 9.61E-01 | 9.44E-01 | 7.87E-01 | 7.08E-01 |
| NP_002826.3    | PTPN12    | tyrosine-protein phosphatase non-receptor type 12 isoform 1                       | 1.19 | 0.83 | 0.98 | 1.03 | 3.57E-01 | 2.40E-01 | 2.80E-01 | 1.60E-01 |
| NP_004584.1    | TRA2B     | transformer-2 protein homolog beta isoform 1                                      | 0.84 | 1.04 | 0.87 | 0.91 | 1.15E-03 | 9.82E-06 | 3.31E-02 | 5.51E-04 |
| NP_001058.2    | TOP2A     | DNA topoisomerase 2-alpha                                                         | 1.67 | 0.91 | 1.52 | 1.09 | 7.53E-02 | 2.58E-02 | 8.40E-02 | 2.03E-02 |
| NP_003898.2    | EIF2B5    | translation initiation factor eIF-2B subunit epsilon                              | 1.10 | 0.95 | 1.05 | 1.09 | 1.24E-02 | 8.74E-04 | 8.00E-02 | 1.82E-02 |
| NP_057441.1    | LIMA1     | LIM domain and actin-binding protein 1 isoform 2                                  | 0.99 | 1.05 | 1.04 | 1.07 | 6.77E-01 | 5.82E-01 | 2.01E-01 | 9.70E-02 |
| XP_005254949.1 | ANPEP     | aminopeptidase N isoform X1                                                       | 1.17 | 0.98 | 1.15 | 1.14 | 1.97E-02 | 2.31E-03 | 7.17E-02 | 1.41E-02 |
| XP_024309835.1 | NFKB1     | nuclear factor NF-kappa-B p105 subunit isoform X1                                 | 1.13 | 0.91 | 1.02 | 1.07 | 3.34E-02 | 6.04E-03 | 7.72E-02 | 1.64E-02 |
| NP_653171.1    | JPT2      | jupiter microtubule associated homolog 2                                          | 0.85 | 1.01 | 0.86 | 0.99 | 6.61E-02 | 2.10E-02 | 1.18E-01 | 3.98E-02 |
| NP_001310552.1 | GNL2      | nucleolar GTP-binding protein 2 isoform 2                                         | 0.88 | 1.04 | 0.92 | 1.05 | 1.17E-01 | 5.05E-02 | 1.03E-01 | 3.08E-02 |
| NP_015561.1    | RANBP3    | ran-binding protein 3 isoform RANBP3-d                                            | 0.96 | 0.93 | 0.90 | 1.00 | 1.55E-01 | 7.64E-02 | 2.79E-01 | 1.59E-01 |
| NP_055204.4    | PELP1     | proline-, glutamic acid- and leucine-rich protein 1 isoform 1                     | 1.10 | 1.01 | 1.11 | 1.08 | 3.89E-02 | 8.17E-03 | 7.04E-02 | 1.35E-02 |
| NP_004695.1    | RRP9      | U3 small nucleolar RNA-interacting protein 2                                      | 1.00 | 1.02 | 1.03 | 1.03 | 9.17E-01 | 8.80E-01 | 5.65E-01 | 4.44E-01 |
| NP_061156.1    | CMAS      | N-acylneuramate cytidyltransferase                                                | 1.13 | 0.99 | 1.13 | 1.06 | 5.30E-03 | 1.64E-04 | 3.31E-02 | 5.37E-04 |
| NP_003759.1    | PEA15     | astrocytic phosphoprotein PEA-15 isoform b                                        | 0.82 | 1.06 | 0.88 | 0.90 | 3.79E-02 | 7.73E-03 | 5.31E-02 | 6.13E-03 |
| NP_004441.1    | ERH       | enhancer of rudimentary homolog                                                   | 1.00 | 0.94 | 0.94 | 1.11 | 7.94E-01 | 7.22E-01 | 7.01E-02 | 1.33E-02 |
| XP_024308564.1 | LYPLA2    | acyl-protein thioesterase 2 isoform X1                                            | 1.09 | 1.02 | 1.11 | 1.04 | 1.64E-01 | 8.30E-02 | 3.01E-01 | 1.78E-01 |
| NP_055720.3    | GLS       | glutaminase kidney isoform, mitochondrial isoform 1 precursor                     | 0.97 | 0.99 | 0.96 | 1.02 | 4.19E-01 | 2.99E-01 | 6.43E-01 | 5.33E-01 |
| XP_024308587.1 | MSH6      | DNA mismatch repair protein Msh6 isoform X1                                       | 1.03 | 0.94 | 0.97 | 1.02 | 5.38E-01 | 4.24E-01 | 1.91E-01 | 8.99E-02 |
| NP_079100.2    | ZC3H14    | zinc finger CCCH domain-containing protein 14 isoform 1                           | 0.99 | 0.97 | 0.96 | 1.00 | 2.21E-01 | 1.25E-01 | 1.32E-01 | 4.81E-02 |
| NP_008860.4    | SKIV2L    | helicase SKI2W                                                                    | 1.03 | 1.05 | 1.08 | 1.08 | 5.85E-01 | 4.76E-01 | 8.77E-01 | 8.26E-01 |
| NP_002991.2    | SDHB      | succinate dehydrogenase [ubiquinone] iron-sulfur subunit, mitochondrial precursor | 1.05 | 0.98 | 1.03 | 1.02 | 1.21E-01 | 5.34E-02 | 1.03E-01 | 3.06E-02 |
| NP_079348.1    | PTGES2    | prostaglandin E synthase 2 isoform 1                                              | 1.05 | 1.06 | 1.11 | 1.09 | 1.79E-01 | 9.36E-02 | 8.54E-01 | 7.96E-01 |
| XP_011532633.1 | OXSRI     | serine/threonine-protein kinase OSR1 isoform X1                                   | 1.04 | 1.02 | 1.06 | 1.04 | 9.91E-02 | 3.91E-02 | 3.88E-01 | 2.59E-01 |
| NP_001275685.1 | BABAM1    | BRISC and BRCA1-A complex member 1 isoform 1                                      | 1.01 | 1.06 | 1.06 | 1.04 | 8.59E-01 | 8.02E-01 | 6.76E-01 | 5.72E-01 |
| NP_000108.1    | EMD       | emerin                                                                            | 1.02 | 1.01 | 1.03 | 1.06 | 1.03E-02 | 5.63E-04 | 7.94E-01 | 7.17E-01 |
| XP_024308018.1 | ACO2      | aconitate hydratase, mitochondrial isoform X1                                     | 1.11 | 0.94 | 1.04 | 1.04 | 1.04E-01 | 4.21E-02 | 9.00E-02 | 2.38E-02 |
| XP_005272732.1 | USP9X     | probable ubiquitin carboxyl-terminal hydrolase FAF-X isoform X1                   | 1.03 | 0.96 | 0.98 | 1.02 | 2.47E-01 | 1.47E-01 | 9.28E-02 | 2.57E-02 |
| XP_024303298.1 | TNC       | tenascin isoform X1                                                               | 0.98 | 1.04 | 1.02 | 1.10 | 2.54E-01 | 1.53E-01 | 8.95E-02 | 2.36E-02 |
| NP_001274730.1 | TBCE      | tubulin-specific chaperone E isoform b                                            | 1.02 | 1.01 | 1.03 | 1.01 | 7.36E-01 | 6.50E-01 | 9.07E-01 | 8.65E-01 |
| NP_005608.1    | RPS14     | 40S ribosomal protein S14                                                         | 1.06 | 0.95 | 1.01 | 1.04 | 1.72E-01 | 8.92E-02 | 1.48E-01 | 5.92E-02 |
| NP_001305131.1 | FHOD1     | FH1/FH2 domain-containing protein 1 isoform 1                                     | 1.09 | 0.89 | 0.97 | 1.03 | 1.74E-02 | 1.84E-03 | 3.58E-02 | 1.78E-03 |
| NP_006807.1    | LMAN2     | vesicular integral-membrane protein VIP36 precursor                               | 1.02 | 0.94 | 0.96 | 1.04 | 5.17E-01 | 4.01E-01 | 1.93E-01 | 9.15E-02 |
| NP_000185.1    | HPRT1     | hypoxanthine-guanine phosphoribosyltransferase                                    | 1.14 | 1.06 | 1.20 | 1.09 | 1.32E-01 | 6.05E-02 | 3.05E-01 | 1.82E-01 |
| NP_001309906.1 | SFXN1     | sideroflexin-1 isoform 1                                                          | 1.06 | 0.99 | 1.04 | 1.00 | 1.06E-02 | 6.28E-04 | 1.12E-01 | 3.58E-02 |
| NP_689478.1    | BTF3L4    | transcription factor BTF3 homolog 4 isoform 1                                     | 0.93 | 1.02 | 0.94 | 0.99 | 1.33E-01 | 6.10E-02 | 1.83E-01 | 8.42E-02 |
| NP_000181.2    | HMBS      | porphobilinogen deaminase isoform 1                                               | 0.97 | 1.02 | 0.99 | 1.11 | 4.42E-01 | 3.22E-01 | 4.07E-01 | 2.78E-01 |
| NP_001120699.1 | CD59      | CD59 glycoprotein                                                                 | 0.76 | 1.17 | 0.89 | 0.87 | 4.78E-03 | 1.40E-04 | 2.72E-02 | 1.79E-04 |
| NP_055271.2    | PDCD4     | programmed cell death protein 4 isoform 1                                         | 0.80 | 0.93 | 0.74 | 0.89 | 1.46E-02 | 1.27E-03 | 9.04E-02 | 2.44E-02 |
| NP_057134.1    | MRPL11    | 39S ribosomal protein L11, mitochondrial isoform a                                | 0.99 | 1.02 | 1.01 | 1.05 | 1.69E-01 | 8.68E-02 | 1.07E-01 | 3.28E-02 |
| NP_057494.3    | CHMP5     | charged multivesicular body protein 5 isoform 1                                   | 0.90 | 1.00 | 0.90 | 1.04 | 8.03E-02 | 2.85E-02 | 9.92E-02 | 2.88E-02 |

|                |              |                                                                                     |      |      |      |      |          |          |          |          |
|----------------|--------------|-------------------------------------------------------------------------------------|------|------|------|------|----------|----------|----------|----------|
| XP_005271527.1 | PHLDB1       | pleckstrin homology-like domain family B member 1 isoform X21                       | 0.84 | 0.90 | 0.76 | 0.97 | 7.79E-02 | 2.70E-02 | 2.77E-01 | 1.56E-01 |
| NP_689971.4    | YTHDF3       | YTH domain-containing family protein 3 isoform a                                    | 0.98 | 0.97 | 0.95 | 1.08 | 5.02E-01 | 3.84E-01 | 8.79E-01 | 8.29E-01 |
| NP_057215.3    | RAB10        | ras-related protein Rab-10                                                          | 1.10 | 0.99 | 1.09 | 1.02 | 1.71E-02 | 1.79E-03 | 1.49E-01 | 5.98E-02 |
| NP_001020.2    | RPS26        | 40S ribosomal protein S26                                                           | 1.10 | 0.88 | 0.97 | 0.98 | 1.49E-01 | 7.19E-02 | 7.26E-02 | 1.49E-02 |
| XP_006722700.1 | CIRBP        | cold-inducible RNA-binding protein isoform X2                                       | 0.62 | 1.00 | 0.62 | 0.93 | 6.65E-03 | 2.56E-04 | 3.31E-02 | 5.74E-04 |
| NP_005773.3    | ALYREF       | THO complex subunit 4                                                               | 0.91 | 1.00 | 0.91 | 0.98 | 6.20E-02 | 1.89E-02 | 8.02E-02 | 1.84E-02 |
| XP_024303470.1 | HINT2        | histidine triad nucleotide-binding protein 2, mitochondrial isoform X1              | 1.10 | 0.98 | 1.08 | 1.11 | 8.49E-02 | 3.12E-02 | 8.57E-02 | 2.13E-02 |
| NP_001164014.1 | PGAM5        | serine/threonine-protein phosphatase PGAM5, mitochondrial isoform 1                 | 1.16 | 0.93 | 1.07 | 1.06 | 6.05E-02 | 1.83E-02 | 5.79E-02 | 8.16E-03 |
| NP_003895.1    | ZPR1         | zinc finger protein ZPR1 isoform 1                                                  | 1.06 | 1.03 | 1.09 | 1.04 | 3.38E-02 | 6.18E-03 | 3.04E-01 | 1.81E-01 |
| NP_004689.1    | PRPF3        | U4/U6 small nuclear ribonucleoprotein Prp3 isoform 1                                | 1.07 | 0.99 | 1.06 | 0.99 | 1.82E-04 | 2.91E-07 | 4.79E-02 | 4.24E-03 |
| NP_004166.1    | SNRPD3       | small nuclear ribonucleoprotein Sm D3                                               | 1.13 | 0.80 | 0.90 | 0.99 | 7.20E-02 | 2.39E-02 | 5.20E-02 | 5.88E-03 |
| XP_005249200.1 | MMUT         | methylmalonyl-CoA mutase, mitochondrial isoform X1                                  | 0.98 | 1.01 | 0.99 | 1.10 | 6.75E-01 | 5.79E-01 | 5.80E-01 | 4.64E-01 |
| NP_057417.3    | SRRM2        | serine/arginine repetitive matrix protein 2                                         | 0.89 | 1.05 | 0.94 | 0.95 | 3.67E-02 | 7.28E-03 | 5.11E-02 | 5.42E-03 |
| NP_463460.1    | FKBP1A       | peptidyl-prolyl cis-trans isomerase FKBP1A isoform a                                | 0.90 | 1.01 | 0.92 | 1.01 | 3.11E-02 | 5.22E-03 | 6.88E-02 | 1.29E-02 |
| NP_001203.1    | CIQBP        | complement component 1 Q subcomponent-binding protein, mitochondrial precursor      | 0.84 | 1.01 | 0.85 | 1.08 | 9.16E-02 | 3.47E-02 | 1.15E-01 | 3.76E-02 |
| NP_003104.2    | SPI00        | nuclear autoantigen Sp-100 isoform 2                                                | 0.84 | 1.24 | 1.03 | 0.92 | 2.17E-01 | 1.22E-01 | 3.41E-01 | 2.13E-01 |
| NP_001243546.1 | TUBGCP2      | gamma-tubulin complex component 2 isoform 1                                         | 1.01 | 0.93 | 0.94 | 0.97 | 6.92E-01 | 6.00E-01 | 2.03E-01 | 9.89E-02 |
| NP_775882.2    | FAM98B       | protein FAM98B                                                                      | 1.03 | 0.99 | 1.02 | 1.02 | 3.12E-01 | 2.00E-01 | 2.85E-01 | 1.64E-01 |
| NP_006744.2    | SURF6        | surfeit locus protein 6 isoform 1                                                   | 0.94 | 1.00 | 0.94 | 1.05 | 1.21E-01 | 5.31E-02 | 1.91E-01 | 8.99E-02 |
| NP_001311.3    | CSNK2B       | casein kinase II subunit beta isoform 1                                             | 1.03 | 0.94 | 0.97 | 1.02 | 5.14E-01 | 3.98E-01 | 2.47E-01 | 1.32E-01 |
| NP_001028675.1 | SAR1B        | GTP-binding protein SAR1b                                                           | 1.20 | 0.97 | 1.17 | 1.03 | 8.10E-02 | 2.91E-02 | 8.74E-02 | 2.25E-02 |
| NP_006852.1    | RAB35        | ras-related protein Rab-35 isoform 1                                                | 1.13 | 0.96 | 1.09 | 1.05 | 1.23E-01 | 5.48E-02 | 1.10E-01 | 3.45E-02 |
| NP_002408.3    | MKI67        | proliferation marker protein Ki-67 isoform 1                                        | 0.99 | 1.02 | 1.01 | 0.98 | 7.42E-01 | 6.59E-01 | 6.82E-01 | 5.80E-01 |
| NP_001008895.1 | CUL4A        | cullin-4A isoform 1                                                                 | 0.95 | 0.95 | 0.90 | 0.97 | 5.17E-01 | 4.02E-01 | 9.95E-01 | 9.93E-01 |
| XP_024304173.1 | GNG12        | guanine nucleotide-binding protein G(I)/G(S)/G(O) subunit gamma-12 isoform X1       | 0.98 | 0.94 | 0.92 | 0.99 | 1.18E-01 | 5.09E-02 | 3.72E-01 | 2.44E-01 |
| NP_001265126.1 | CDK5RAP3     | CDK5 regulatory subunit-associated protein 3 isoform c                              | 1.08 | 0.96 | 1.04 | 1.09 | 7.30E-02 | 2.43E-02 | 7.80E-02 | 1.67E-02 |
| XP_016878876.1 | P DPR        | pyruvate dehydrogenase phosphatase regulatory subunit, mitochondrial isoform X1     | 1.09 | 0.93 | 1.02 | 0.99 | 2.74E-01 | 1.71E-01 | 1.51E-01 | 6.12E-02 |
| NP_058431.2    | CRK          | adapter molecule crk isoform a                                                      | 0.87 | 1.04 | 0.91 | 0.95 | 1.22E-01 | 5.45E-02 | 1.09E-01 | 3.41E-02 |
| NP_055449.1    | PPM1F        | protein phosphatase 1F                                                              | 1.06 | 0.99 | 1.05 | 1.02 | 1.71E-01 | 8.83E-02 | 2.65E-01 | 1.47E-01 |
| XP_011543857.1 | RPS6KA3      | ribosomal protein S6 kinase alpha-3 isoform X1                                      | 1.10 | 0.94 | 1.04 | 1.11 | 2.59E-02 | 3.75E-03 | 4.67E-02 | 3.99E-03 |
| XP_024308976.1 | KYNU         | kynureninase isoform X1                                                             | 1.10 | 0.98 | 1.08 | 1.02 | 5.78E-02 | 1.71E-02 | 1.05E-01 | 3.22E-02 |
| NP_078880.2    | RPAP3        | RNA polymerase II-associated protein 3 isoform 1                                    | 1.08 | 0.88 | 0.96 | 1.00 | 1.73E-01 | 8.99E-02 | 1.25E-01 | 4.37E-02 |
| NP_036256.2    | CHORDC1      | cysteine and histidine-rich domain-containing protein 1 isoform a                   | 1.07 | 0.96 | 1.02 | 1.00 | 6.97E-02 | 2.26E-02 | 1.29E-01 | 4.64E-02 |
| NP_001157940.1 | TMED7-TICAM2 | TRAM adaptor with GOLD domain isoform 1 precursor                                   | 1.30 | 0.84 | 1.09 | 1.20 | 5.80E-02 | 1.72E-02 | 8.12E-02 | 1.89E-02 |
| XP_016880028.1 | ABR          | active breakpoint cluster region-related protein isoform X1                         | 0.99 | 0.97 | 0.97 | 1.03 | 7.32E-01 | 6.46E-01 | 4.95E-01 | 3.69E-01 |
| NP_005685.1    | COX17        | cytochrome c oxidase copper chaperone                                               | 0.78 | 0.90 | 0.70 | 0.85 | 1.03E-01 | 4.14E-02 | 3.10E-01 | 1.86E-01 |
| NP_037368.1    | ATXN10       | ataxin-10 isoform 1                                                                 | 0.96 | 0.96 | 0.92 | 0.92 | 1.38E-01 | 6.44E-02 | 9.96E-01 | 9.96E-01 |
| XP_016863889.1 | SEPTIN11     | septin-11 isoform X1                                                                | 1.11 | 1.01 | 1.12 | 1.02 | 5.39E-02 | 1.52E-02 | 1.76E-01 | 7.97E-02 |
| NP_005861.2    | SAP18        | histone deacetylase complex subunit SAP18 isoform 1                                 | 0.91 | 1.01 | 0.92 | 0.96 | 1.86E-01 | 9.87E-02 | 2.16E-01 | 1.07E-01 |
| XP_024307057.1 | TXNL1        | thioredoxin-like protein 1 isoform X1                                               | 0.97 | 0.87 | 0.84 | 0.90 | 5.54E-01 | 4.42E-01 | 2.01E-01 | 9.72E-02 |
| NP_004588.1    | SNRPD2       | small nuclear ribonucleoprotein Sm D2 isoform 1                                     | 1.02 | 0.95 | 0.97 | 1.05 | 3.99E-01 | 2.79E-01 | 1.56E-01 | 6.49E-02 |
| NP_001020419.1 | DUT          | deoxyuridine 5'-triphosphate nucleotidohydrolase, mitochondrial isoform 1 precursor | 0.85 | 0.98 | 0.83 | 1.03 | 1.51E-02 | 1.37E-03 | 7.88E-02 | 1.74E-02 |
| XP_011544158.2 | NDUFAB1      | acyl carrier protein, mitochondrial isoform X1                                      | 0.77 | 0.93 | 0.72 | 0.86 | 1.93E-02 | 2.21E-03 | 5.72E-02 | 7.74E-03 |
| NP_002802.2    | PSMD7        | 26S proteasome non-ATPase regulatory subunit 7                                      | 1.07 | 1.05 | 1.13 | 0.99 | 1.20E-01 | 5.25E-02 | 4.11E-01 | 2.83E-01 |
| NP_003891.1    | SQSTM1       | sequestosome-1 isoform 1                                                            | 1.29 | 1.29 | 1.65 | 1.23 | 3.39E-02 | 6.27E-03 | 9.93E-01 | 9.89E-01 |
| NP_006651.2    | CLPX         | ATP-dependent Clp protease ATP-binding subunit clpX-like, mitochondrial precursor   | 0.98 | 0.93 | 0.91 | 1.03 | 5.59E-01 | 4.48E-01 | 5.38E-01 | 4.15E-01 |

|                |          |                                                                                                                      |      |      |      |      |          |          |          |          |
|----------------|----------|----------------------------------------------------------------------------------------------------------------------|------|------|------|------|----------|----------|----------|----------|
| NP_001186848.1 | PGM3     | phosphoacetylglucosamine mutase isoform 4                                                                            | 1.14 | 0.96 | 1.10 | 1.10 | 5.17E-02 | 1.41E-02 | 7.21E-02 | 1.47E-02 |
| NP_077305.2    | EFHD2    | EF-hand domain-containing protein D2                                                                                 | 0.96 | 1.04 | 0.99 | 0.97 | 9.91E-02 | 3.92E-02 | 7.88E-02 | 1.72E-02 |
| NP_001207417.1 | CDH13    | cadherin-13 isoform 2                                                                                                | 0.95 | 1.04 | 0.99 | 1.07 | 3.20E-01 | 2.08E-01 | 2.01E-01 | 9.71E-02 |
| NP_005850.1    | PURA     | transcriptional activator protein Pur-alpha                                                                          | 1.20 | 0.92 | 1.11 | 1.04 | 8.76E-02 | 3.26E-02 | 8.47E-02 | 2.08E-02 |
| NP_002477.1    | NCBP1    | nuclear cap-binding protein subunit 1 isoform 1                                                                      | 1.05 | 0.89 | 0.93 | 1.03 | 4.65E-02 | 1.14E-02 | 1.22E-01 | 4.23E-02 |
| XP_006718779.1 | PPFIA1   | liprin-alpha-1 isoform X1                                                                                            | 1.01 | 0.95 | 0.96 | 1.03 | 2.95E-01 | 1.86E-01 | 2.60E-01 | 1.42E-01 |
| NP_055851.1    | ENDOD1   | endonuclease domain-containing 1 protein precursor                                                                   | 1.19 | 0.93 | 1.11 | 1.01 | 2.45E-02 | 3.41E-03 | 4.33E-02 | 2.84E-03 |
| NP_000377.1    | BLMH     | bleomycin hydrolase                                                                                                  | 1.01 | 1.02 | 1.03 | 1.04 | 4.34E-01 | 3.13E-01 | 6.92E-01 | 5.91E-01 |
| NP_001352054.1 | NUP98    | nuclear pore complex protein Nup98-Nup96 isoform 5                                                                   | 1.06 | 0.97 | 1.02 | 1.05 | 4.60E-01 | 3.41E-01 | 3.49E-01 | 2.22E-01 |
| NP_001096617.1 | GIGYF2   | GRB10-interacting GYF protein 2 isoform a                                                                            | 0.97 | 1.01 | 0.98 | 1.05 | 6.28E-01 | 5.24E-01 | 6.41E-01 | 5.31E-01 |
| NP_001240308.1 | RPL15    | 60S ribosomal protein L15 isoform 1                                                                                  | 1.10 | 0.98 | 1.08 | 1.03 | 8.16E-02 | 2.94E-02 | 1.36E-01 | 5.06E-02 |
| NP_008824.2    | EIF2D    | eukaryotic translation initiation factor 2D isoform 1                                                                | 1.06 | 0.99 | 1.04 | 1.12 | 3.33E-01 | 2.18E-01 | 2.90E-01 | 1.69E-01 |
| XP_016882419.1 | MAP1S    | microtubule-associated protein 1S isoform X1                                                                         | 1.14 | 1.00 | 1.14 | 1.10 | 8.26E-02 | 2.98E-02 | 1.13E-01 | 3.62E-02 |
| NP_001001998.1 | EXOSC10  | exosome component 10 isoform 1                                                                                       | 0.98 | 1.05 | 1.02 | 1.05 | 7.67E-01 | 6.88E-01 | 5.93E-01 | 4.78E-01 |
| NP_852478.1    | ITGA1    | integrin alpha-1 precursor                                                                                           | 0.71 | 0.85 | 0.60 | 0.81 | 9.22E-03 | 4.63E-04 | 6.65E-02 | 1.16E-02 |
| NP_055842.2    | PDXDC1   | pyridoxal-dependent decarboxylase domain-containing protein 1 isoform 1                                              | 1.06 | 0.94 | 0.99 | 1.12 | 2.48E-03 | 4.10E-05 | 1.14E-01 | 3.68E-02 |
| NP_003305.1    | TTC1     | tetratricopeptide repeat protein 1                                                                                   | 0.91 | 1.04 | 0.94 | 1.06 | 2.02E-02 | 2.42E-03 | 3.53E-02 | 1.57E-03 |
| NP_056016.1    | BOP1     | ribosome biogenesis protein BOP1                                                                                     | 1.08 | 1.01 | 1.09 | 1.05 | 5.49E-02 | 1.57E-02 | 1.14E-01 | 3.66E-02 |
| XP_005258803.1 | CHMP2A   | charged multivesicular body protein 2a isoform X1                                                                    | 1.06 | 0.97 | 1.03 | 1.03 | 7.78E-02 | 2.70E-02 | 1.30E-01 | 4.71E-02 |
| NP_006806.1    | TMED2    | transmembrane emp24 domain-containing protein 2 isoform 1 precursor                                                  | 1.18 | 0.91 | 1.08 | 1.16 | 1.14E-01 | 4.87E-02 | 8.65E-02 | 2.18E-02 |
| NP_006347.1    | ATP5PD   | ATP synthase subunit d, mitochondrial isoform a                                                                      | 0.90 | 1.09 | 0.98 | 1.05 | 1.00E-01 | 4.00E-02 | 6.88E-02 | 1.29E-02 |
| XP_005257603.2 | RNF213   | E3 ubiquitin-protein ligase RNF213 isoform X1                                                                        | 0.97 | 0.98 | 0.95 | 1.03 | 1.10E-01 | 4.60E-02 | 2.74E-01 | 1.54E-01 |
| NP_115679.2    | HSDL2    | hydroxysteroid dehydrogenase-like protein 2 isoform 1                                                                | 1.05 | 0.95 | 1.00 | 1.08 | 4.64E-01 | 3.46E-01 | 2.65E-01 | 1.47E-01 |
| NP_057141.1    | COPZ1    | coatamer subunit zeta-1 isoform 1                                                                                    | 1.05 | 0.98 | 1.04 | 1.06 | 1.92E-02 | 2.18E-03 | 3.53E-02 | 1.68E-03 |
| NP_001073271.1 | GAA      | lysosomal alpha-glucosidase                                                                                          | 0.71 | 1.08 | 0.77 | 0.89 | 1.43E-02 | 1.18E-03 | 3.45E-02 | 9.16E-04 |
| XP_024304000.1 | LOXL4    | lysyl oxidase homolog 4 isoform X1                                                                                   | 0.93 | 1.05 | 0.97 | 1.08 | 3.65E-01 | 2.47E-01 | 4.08E-01 | 2.79E-01 |
| NP_001909.3    | DBT      | lipoamide acyltransferase component of branched-chain alpha-keto acid dehydrogenase complex, mitochondrial precursor | 1.13 | 0.91 | 1.02 | 1.02 | 4.32E-02 | 9.95E-03 | 1.19E-01 | 4.03E-02 |
| NP_001166925.1 | PDHA1    | pyruvate dehydrogenase E1 component subunit alpha, somatic form, mitochondrial isoform 2 precursor                   | 1.10 | 0.96 | 1.06 | 1.08 | 8.02E-02 | 2.82E-02 | 1.02E-01 | 3.02E-02 |
| NP_036357.1    | NUBP2    | cytosolic Fe-S cluster assembly factor NUBP2 isoform 1                                                               | 1.01 | 0.99 | 1.00 | 1.09 | 8.06E-01 | 7.36E-01 | 6.83E-01 | 5.80E-01 |
| NP_001025178.1 | APIG1    | AP-1 complex subunit gamma-1 isoform a                                                                               | 1.08 | 0.94 | 1.01 | 1.04 | 1.32E-01 | 6.07E-02 | 9.33E-02 | 2.58E-02 |
| XP_011518907.1 | EPS8     | epidermal growth factor receptor kinase substrate 8 isoform X1                                                       | 1.24 | 1.06 | 1.34 | 1.16 | 4.04E-01 | 2.84E-01 | 6.03E-01 | 4.89E-01 |
| NP_005434.4    | PAPSS1   | bifunctional 3'-phosphoadenosine 5'-phosphosulfate synthase 1                                                        | 1.07 | 0.95 | 1.02 | 1.04 | 4.78E-01 | 3.60E-01 | 3.10E-01 | 1.87E-01 |
| NP_001258766.1 | RCN2     | reticulocalbin-2 isoform b precursor                                                                                 | 0.90 | 1.07 | 0.96 | 0.90 | 4.92E-01 | 3.74E-01 | 3.42E-01 | 2.15E-01 |
| NP_005619.1    | SLC1A5   | neutral amino acid transporter B(0) isoform 1                                                                        | 1.07 | 1.02 | 1.09 | 1.01 | 1.48E-01 | 7.17E-02 | 2.36E-01 | 1.22E-01 |
| NP_000994.1    | RPLP1    | 60S acidic ribosomal protein P1 isoform 1                                                                            | 0.80 | 1.05 | 0.84 | 0.91 | 1.83E-01 | 9.63E-02 | 1.60E-01 | 6.77E-02 |
| NP_958815.1    | LUC7L    | putative RNA-binding protein Luc7-like 1 isoform b                                                                   | 1.01 | 0.96 | 0.97 | 1.02 | 7.94E-01 | 7.21E-01 | 6.02E-01 | 4.87E-01 |
| NP_001341012.1 | PSME3IP1 | PSME3-interacting protein isoform a                                                                                  | 0.78 | 0.92 | 0.72 | 0.91 | 1.68E-01 | 8.62E-02 | 2.94E-01 | 1.73E-01 |
| NP_001139786.1 | ABHD14B  | protein ABHD14B isoform 1                                                                                            | 1.13 | 0.85 | 0.96 | 1.07 | 2.67E-02 | 4.01E-03 | 7.88E-02 | 1.74E-02 |
| NP_000894.1    | NQO1     | NAD(P)H dehydrogenase [quinone] 1 isoform a                                                                          | 0.71 | 0.95 | 0.67 | 0.93 | 2.60E-02 | 3.78E-03 | 5.92E-02 | 8.63E-03 |
| NP_001008274.1 | TAGLN3   | transgelin-3                                                                                                         | 1.09 | 1.03 | 1.12 | 1.11 | 4.60E-02 | 1.11E-02 | 9.04E-02 | 2.43E-02 |
| NP_002804.2    | PSMD9    | 26S proteasome non-ATPase regulatory subunit 9 isoform 1                                                             | 0.92 | 1.03 | 0.95 | 1.05 | 1.86E-01 | 9.91E-02 | 1.54E-01 | 6.34E-02 |
| NP_056167.1    | POFUT1   | GDP-fucose protein O-fucosyltransferase 1 isoform 1 precursor                                                        | 1.12 | 0.98 | 1.10 | 1.02 | 1.31E-02 | 9.82E-04 | 1.26E-01 | 4.41E-02 |
| XP_011518046.1 | CUL2     | cullin-2 isoform X1                                                                                                  | 1.14 | 0.94 | 1.07 | 1.08 | 3.38E-02 | 6.21E-03 | 4.48E-02 | 3.47E-03 |
| NP_062427.1    | S100A4   | protein S100-A4                                                                                                      | 0.93 | 1.00 | 0.93 | 0.89 | 1.58E-01 | 7.89E-02 | 1.76E-01 | 7.91E-02 |
| NP_003469.2    | CUL5     | cullin-5                                                                                                             | 1.15 | 0.91 | 1.05 | 1.04 | 1.96E-01 | 1.06E-01 | 1.41E-01 | 5.49E-02 |
| XP_024304296.1 | NUCB2    | nucleobindin-2 isoform X1                                                                                            | 0.94 | 1.11 | 1.04 | 0.97 | 1.17E-01 | 5.07E-02 | 5.79E-02 | 8.02E-03 |



|                |          |                                                                                        |      |      |      |      |          |          |          |          |
|----------------|----------|----------------------------------------------------------------------------------------|------|------|------|------|----------|----------|----------|----------|
| XP_016874755.1 | ITPR2    | inositol 1,4,5-trisphosphate receptor type 2 isoform X1                                | 1.08 | 0.97 | 1.04 | 1.05 | 4.78E-02 | 1.19E-02 | 1.12E-01 | 3.57E-02 |
| NP_001336850.1 | RPL27    | 60S ribosomal protein L27                                                              | 0.98 | 1.00 | 0.98 | 0.90 | 7.28E-01 | 6.40E-01 | 7.94E-01 | 7.18E-01 |
| NP_001172005.1 | FMR1     | synaptic functional regulator FMR1 isoform ISO7                                        | 1.11 | 0.82 | 0.89 | 0.90 | 4.64E-01 | 3.46E-01 | 4.68E-01 | 3.41E-01 |
| NP_000631.1    | IL13RA2  | interleukin-13 receptor subunit alpha-2 precursor                                      | 0.65 | 0.88 | 0.57 | 0.84 | 1.48E-03 | 1.51E-05 | 1.80E-02 | 3.84E-05 |
| NP_001335098.1 | HDFGFL2  | hepatoma-derived growth factor-related protein 2 isoform 3                             | 0.76 | 1.06 | 0.81 | 0.86 | 2.51E-02 | 3.52E-03 | 4.33E-02 | 2.86E-03 |
| NP_060587.8    | WDR11    | WD repeat-containing protein 11                                                        | 1.17 | 0.93 | 1.08 | 1.08 | 1.21E-01 | 5.34E-02 | 9.95E-02 | 2.91E-02 |
| NP_002098.1    | H3-3A    | histone H3.3                                                                           | 1.05 | 0.96 | 1.00 | 0.95 | 4.41E-02 | 1.03E-02 | 6.77E-02 | 1.23E-02 |
| NP_005902.1    | MAT2A    | S-adenosylmethionine synthase isoform type-2                                           | 1.00 | 0.93 | 0.93 | 0.98 | 9.36E-01 | 9.08E-01 | 1.18E-01 | 3.95E-02 |
| NP_002873.1    | RANBP1   | ran-specific GTPase-activating protein isoform 2                                       | 0.87 | 1.07 | 0.92 | 0.96 | 2.71E-01 | 1.68E-01 | 2.65E-01 | 1.47E-01 |
| NP_006006.3    | ARID1A   | AT-rich interactive domain-containing protein 1A isoform a                             | 1.00 | 0.96 | 0.96 | 0.99 | 9.09E-01 | 8.68E-01 | 4.18E-01 | 2.90E-01 |
| NP_005317.2    | HAGH     | hydroxyacylglutathione hydrolase, mitochondrial isoform 1 precursor                    | 1.06 | 0.95 | 1.01 | 1.08 | 2.22E-01 | 1.27E-01 | 1.21E-01 | 4.12E-02 |
| NP_002195.1    | ITGA3    | integrin alpha-3                                                                       | 0.76 | 1.06 | 0.81 | 1.10 | 8.76E-03 | 4.17E-04 | 4.87E-02 | 4.55E-03 |
| NP_000276.2    | PEPD     | xaa-Pro dipeptidase isoform 1                                                          | 1.10 | 0.96 | 1.07 | 1.10 | 4.18E-02 | 9.24E-03 | 6.13E-02 | 9.56E-03 |
| XP_006722908.1 | SMARCA4  | transcription activator BRG1 isoform X1                                                | 0.91 | 0.94 | 0.86 | 0.96 | 1.18E-01 | 5.16E-02 | 3.51E-01 | 2.24E-01 |
| NP_005330.1    | UBE2K    | ubiquitin-conjugating enzyme E2 K isoform 1                                            | 1.00 | 0.99 | 0.99 | 1.07 | 9.09E-01 | 8.69E-01 | 5.90E-01 | 4.74E-01 |
| NP_060941.2    | ZC3H15   | zinc finger CCCH domain-containing protein 15                                          | 0.94 | 1.02 | 0.96 | 0.95 | 8.02E-02 | 2.84E-02 | 1.37E-01 | 5.17E-02 |
| NP_037415.1    | MAT2B    | methionine adenosyltransferase 2 subunit beta isoform 1                                | 1.04 | 0.97 | 1.01 | 1.02 | 9.33E-02 | 3.56E-02 | 8.87E-02 | 2.32E-02 |
| NP_001316055.1 | DNAJC13  | dnaJ homolog subfamily C member 13 isoform 1                                           | 1.08 | 0.98 | 1.06 | 1.04 | 2.29E-01 | 1.32E-01 | 2.75E-01 | 1.55E-01 |
| XP_024309873.1 | OCIAD1   | OCIA domain-containing protein 1 isoform X1                                            | 0.95 | 1.03 | 0.98 | 1.09 | 2.26E-01 | 1.29E-01 | 1.74E-01 | 7.71E-02 |
| NP_002159.2    | IDH2     | isocitrate dehydrogenase [NADP], mitochondrial isoform 1 precursor                     | 1.08 | 0.93 | 1.01 | 1.08 | 7.55E-02 | 2.59E-02 | 7.18E-02 | 1.42E-02 |
| NP_689926.1    | STT3A    | dolichyl-diphosphooligosaccharide--protein glycosyltransferase subunit STT3A isoform a | 1.06 | 0.97 | 1.02 | 1.00 | 2.03E-02 | 2.45E-03 | 1.17E-01 | 3.91E-02 |
| NP_001124384.1 | SUGT1    | protein SGT1 homolog isoform B                                                         | 0.92 | 1.03 | 0.96 | 0.99 | 1.66E-02 | 1.70E-03 | 1.08E-01 | 3.34E-02 |
| NP_004703.1    | HGS      | hepatocyte growth factor-regulated tyrosine kinase substrate                           | 0.91 | 1.12 | 1.02 | 0.98 | 2.05E-02 | 2.48E-03 | 7.57E-02 | 1.60E-02 |
| XP_016873261.1 | MRE11    | double-strand break repair protein MRE11 isoform X1                                    | 1.04 | 0.91 | 0.95 | 1.06 | 1.25E-01 | 5.59E-02 | 1.80E-01 | 8.24E-02 |
| NP_055454.1    | TTC37    | tetratricopeptide repeat protein 37                                                    | 1.04 | 0.96 | 1.00 | 1.09 | 3.99E-01 | 2.79E-01 | 2.27E-01 | 1.15E-01 |
| NP_001171795.2 | FCRLA    | Fc receptor-like A isoform 1 precursor                                                 | 1.07 | 1.04 | 1.11 | 1.24 | 5.99E-01 | 4.92E-01 | 9.05E-01 | 8.62E-01 |
| NP_006747.1    | TCEA1    | transcription elongation factor A protein 1 isoform 1                                  | 0.82 | 1.03 | 0.84 | 1.01 | 3.87E-02 | 8.03E-03 | 8.25E-02 | 1.94E-02 |
| NP_003525.1    | H3C8     | histone H3.1                                                                           | 1.02 | 1.00 | 1.02 | 0.84 | 8.43E-02 | 3.08E-02 | 1.14E-01 | 3.66E-02 |
| NP_001295093.1 | GFM1     | elongation factor G, mitochondrial isoform 1                                           | 1.05 | 0.96 | 1.00 | 1.04 | 5.74E-01 | 4.64E-01 | 4.89E-01 | 3.62E-01 |
| NP_001193997.1 | BZW1     | basic leucine zipper and W2 domain-containing protein 1 isoform 2                      | 1.02 | 0.98 | 1.00 | 1.01 | 4.83E-01 | 3.66E-01 | 2.88E-01 | 1.67E-01 |
| NP_006563.2    | GNA13    | guanine nucleotide-binding protein subunit alpha-13 isoform 1                          | 1.04 | 0.99 | 1.02 | 1.05 | 6.95E-01 | 6.03E-01 | 6.03E-01 | 4.88E-01 |
| NP_001137359.1 | COPS2    | COP9 signalosome complex subunit 2 isoform 2                                           | 1.00 | 0.99 | 0.98 | 0.99 | 8.95E-01 | 8.52E-01 | 8.91E-01 | 8.43E-01 |
| NP_003468.2    | PDHX     | pyruvate dehydrogenase protein X component, mitochondrial isoform 1 precursor          | 1.09 | 0.99 | 1.07 | 1.07 | 3.62E-02 | 7.08E-03 | 7.18E-02 | 1.42E-02 |
| XP_011522362.1 | RABEP1   | rab GTPase-binding effector protein 1 isoform X1                                       | 0.91 | 1.02 | 0.92 | 0.96 | 3.39E-01 | 2.23E-01 | 3.11E-01 | 1.87E-01 |
| NP_076950.1    | DDX50    | ATP-dependent RNA helicase DDX50                                                       | 1.42 | 0.81 | 1.08 | 1.11 | 5.12E-01 | 3.95E-01 | 4.07E-01 | 2.77E-01 |
| NP_062552.2    | MEPCE    | 7SK snRNA methylphosphate capping enzyme isoform A                                     | 1.02 | 0.99 | 1.02 | 1.01 | 7.85E-01 | 7.09E-01 | 7.31E-01 | 6.37E-01 |
| NP_060037.4    | NAGK     | N-acetyl-D-glucosamine kinase isoform 1                                                | 1.04 | 0.97 | 1.01 | 0.99 | 5.62E-01 | 4.51E-01 | 4.35E-01 | 3.06E-01 |
| NP_002631.3    | SERPINB8 | serpin B8 isoform a                                                                    | 1.06 | 0.93 | 0.98 | 1.00 | 9.90E-02 | 3.90E-02 | 7.20E-02 | 1.45E-02 |
| NP_054902.1    | DYNLRB1  | dynein light chain roadblock-type 1 isoform a                                          | 1.02 | 0.99 | 1.01 | 1.11 | 4.98E-01 | 3.80E-01 | 5.09E-01 | 3.84E-01 |
| NP_064576.1    | MRPS22   | 28S ribosomal protein S22, mitochondrial isoform 1                                     | 1.02 | 0.97 | 1.00 | 1.04 | 7.81E-02 | 2.72E-02 | 1.39E-01 | 5.30E-02 |
| NP_055278.1    | LSM3     | U6 snRNA-associated Sm-like protein LSM3                                               | 0.94 | 0.98 | 0.92 | 1.04 | 7.78E-02 | 2.70E-02 | 1.54E-01 | 6.28E-02 |
| NP_057445.4    | ACP6     | lysophosphatidic acid phosphatase type 6 isoform 1                                     | 1.01 | 0.98 | 0.99 | 1.00 | 9.05E-01 | 8.63E-01 | 7.12E-01 | 6.13E-01 |
| NP_001346.1    | DDT      | D-dopachrome decarboxylase                                                             | 1.00 | 0.97 | 0.97 | 1.03 | 9.87E-01 | 9.83E-01 | 4.75E-01 | 3.48E-01 |
| NP_996790.3    | PRKAA1   | 5'-AMP-activated protein kinase catalytic subunit alpha-1 isoform 2                    | 1.08 | 1.01 | 1.09 | 1.05 | 1.35E-01 | 6.28E-02 | 2.47E-01 | 1.31E-01 |
| NP_005717.3    | TSMF     | elongation factor Ts, mitochondrial isoform 2 precursor                                | 0.87 | 1.01 | 0.88 | 0.93 | 3.68E-02 | 7.37E-03 | 6.35E-02 | 1.03E-02 |
| NP_002706.1    | PPP2CA   | serine/threonine-protein phosphatase 2A catalytic subunit alpha isoform 1              | 1.08 | 0.96 | 1.04 | 1.06 | 9.36E-02 | 3.58E-02 | 8.02E-02 | 1.84E-02 |
| XP_005253433.1 | M6PR     | cation-dependent mannose-6-phosphate receptor isoform X1                               | 0.91 | 1.12 | 1.02 | 1.04 | 2.36E-01 | 1.38E-01 | 1.15E-01 | 3.73E-02 |

|                |          |                                                                       |      |      |      |      |          |          |          |          |
|----------------|----------|-----------------------------------------------------------------------|------|------|------|------|----------|----------|----------|----------|
| NP_057001.1    | GSTK1    | glutathione S-transferase kappa 1 isoform a                           | 1.02 | 1.04 | 1.06 | 0.95 | 5.74E-02 | 1.69E-02 | 9.18E-02 | 2.53E-02 |
| NP_001104262.1 | MECP2    | methyl-CpG-binding protein 2 isoform 2                                | 0.95 | 1.02 | 0.97 | 1.00 | 3.88E-01 | 2.69E-01 | 3.08E-01 | 1.84E-01 |
| NP_036347.1    | OGA      | protein O-GlcNAcase isoform a                                         | 1.14 | 0.89 | 1.02 | 1.15 | 2.21E-01 | 1.26E-01 | 1.68E-01 | 7.27E-02 |
| XP_024309466.1 | RPL29    | 60S ribosomal protein L29 isoform X1                                  | 0.87 | 1.10 | 0.96 | 0.93 | 6.37E-02 | 1.99E-02 | 5.50E-02 | 6.98E-03 |
| XP_024308995.1 | TRIP12   | E3 ubiquitin-protein ligase TRIP12 isoform X1                         | 1.21 | 1.14 | 1.40 | 1.10 | 3.68E-01 | 2.51E-01 | 7.99E-01 | 7.24E-01 |
| XP_024303906.1 | SVIL     | supervillin isoform X1                                                | 0.96 | 0.96 | 0.92 | 0.99 | 1.79E-01 | 9.35E-02 | 9.14E-01 | 8.76E-01 |
| NP_003061.3    | SMARCA2  | probable global transcription activator SNF2L2 isoform a              | 1.02 | 1.04 | 1.06 | 1.03 | 4.58E-01 | 3.39E-01 | 9.19E-01 | 8.82E-01 |
| NP_001027459.1 | UBE2V1   | ubiquitin-conjugating enzyme E2 variant 1 isoform d                   | 1.13 | 0.91 | 1.02 | 1.10 | 1.16E-02 | 7.62E-04 | 4.47E-02 | 3.36E-03 |
| NP_006353.2    | NXF1     | nuclear RNA export factor 1 isoform 1                                 | 0.98 | 0.98 | 0.97 | 1.04 | 2.38E-01 | 1.39E-01 | 7.06E-01 | 6.05E-01 |
| NP_001311048.1 | CYFIP1   | cytoplasmic FMR1-interacting protein 1 isoform c                      | 1.02 | 0.93 | 0.95 | 1.00 | 5.37E-01 | 4.23E-01 | 2.31E-01 | 1.19E-01 |
| XP_016856465.1 | DNM3     | dynammin-3 isoform X1                                                 | 1.15 | 0.87 | 0.99 | 1.11 | 4.82E-01 | 3.64E-01 | 3.67E-01 | 2.39E-01 |
| XP_016863314.1 | SPATA5   | ATPase family protein 2 homolog isoform X1                            | 1.08 | 0.96 | 1.04 | 1.05 | 4.82E-01 | 3.64E-01 | 3.68E-01 | 2.40E-01 |
| NP_001034271.2 | BOLA2B   | bola-like protein 2 isoform 1                                         | 0.90 | 1.04 | 0.94 | 0.91 | 4.78E-03 | 1.39E-04 | 3.80E-02 | 2.13E-03 |
| NP_037468.1    | SEC61A1  | protein transport protein Sec61 subunit alpha isoform 1               | 1.01 | 0.96 | 0.97 | 0.93 | 3.75E-01 | 2.56E-01 | 9.50E-02 | 2.70E-02 |
| NP_112576.1    | SH3BGLR3 | SH3 domain-binding glutamic acid-rich-like protein 3                  | 0.90 | 1.03 | 0.93 | 0.98 | 1.06E-02 | 6.19E-04 | 3.53E-02 | 1.33E-03 |
| NP_060828.2    | ABCF3    | ATP-binding cassette sub-family F member 3 isoform 1                  | 1.07 | 0.94 | 1.00 | 1.07 | 1.24E-01 | 5.57E-02 | 7.88E-02 | 1.74E-02 |
| XP_024304270.1 | INPPL1   | phosphatidylinositol 3,4,5-trisphosphate 5-phosphatase 2 isoform X1   | 1.08 | 0.94 | 1.02 | 1.04 | 8.91E-02 | 3.35E-02 | 1.07E-01 | 3.32E-02 |
| NP_001668.1    | ATP1B1   | sodium/potassium-transporting ATPase subunit beta-1                   | 1.07 | 0.98 | 1.05 | 1.13 | 2.02E-01 | 1.11E-01 | 3.04E-01 | 1.81E-01 |
| NP_001240837.1 | AKR1C3   | aldo-keto reductase family 1 member C3 isoform 2                      | 1.04 | 0.99 | 1.03 | 1.11 | 2.97E-01 | 1.88E-01 | 2.73E-01 | 1.53E-01 |
| XP_024305322.1 | ERO1A    | ERO1-like protein alpha isoform X1                                    | 1.06 | 0.92 | 0.98 | 1.02 | 8.70E-02 | 3.22E-02 | 6.35E-02 | 1.04E-02 |
| NP_001528.1    | HSBP1    | heat shock factor-binding protein 1                                   | 0.77 | 1.05 | 0.81 | 0.93 | 4.50E-02 | 1.07E-02 | 6.64E-02 | 1.14E-02 |
| XP_011533233.1 | PARP4    | protein mono-ADP-ribosyltransferase PARP4 isoform X1                  | 1.04 | 0.99 | 1.02 | 1.05 | 3.43E-01 | 2.27E-01 | 3.41E-01 | 2.14E-01 |
| XP_005268422.1 | TCERG1   | transcription elongation regulator 1 isoform X1                       | 1.03 | 1.01 | 1.04 | 1.06 | 1.09E-01 | 4.57E-02 | 5.24E-01 | 4.01E-01 |
| NP_056473.3    | NOC2L    | nucleolar complex protein 2 homolog                                   | 1.09 | 0.97 | 1.06 | 1.03 | 3.38E-02 | 6.21E-03 | 5.86E-02 | 8.47E-03 |
| XP_016864445.1 | PAIP1    | polyadenylate-binding protein-interacting protein 1 isoform X1        | 1.11 | 0.84 | 0.93 | 1.03 | 6.58E-02 | 2.09E-02 | 4.59E-02 | 3.83E-03 |
| NP_003748.1    | EIF3I    | eukaryotic translation initiation factor 3 subunit I                  | 0.93 | 0.96 | 0.89 | 0.99 | 1.06E-02 | 6.12E-04 | 7.39E-02 | 1.53E-02 |
| NP_075565.2    | COA7     | cytochrome c oxidase assembly factor 7                                | 1.00 | 0.95 | 0.95 | 1.04 | 9.71E-01 | 9.58E-01 | 1.01E-01 | 2.97E-02 |
| NP_009145.1    | SEC63    | translocation protein SEC63 homolog                                   | 1.04 | 1.01 | 1.05 | 1.03 | 8.02E-02 | 2.83E-02 | 1.25E-01 | 4.39E-02 |
| XP_005264900.1 | OSBPL10  | oxysterol-binding protein-related protein 10 isoform X1               | 0.97 | 0.95 | 0.92 | 1.00 | 4.19E-01 | 2.98E-01 | 5.37E-01 | 4.14E-01 |
| NP_005722.1    | ARPC2    | actin-related protein 2/3 complex subunit 2                           | 1.11 | 0.93 | 1.03 | 0.99 | 4.47E-02 | 1.05E-02 | 1.98E-01 | 9.53E-02 |
| NP_003745.1    | EIF3F    | eukaryotic translation initiation factor 3 subunit F                  | 1.01 | 0.96 | 0.96 | 1.00 | 8.35E-01 | 7.72E-01 | 2.52E-01 | 1.36E-01 |
| NP_055063.1    | RBX1     | E3 ubiquitin-protein ligase RBX1                                      | 1.07 | 0.88 | 0.94 | 1.13 | 1.78E-02 | 1.90E-03 | 3.38E-02 | 7.45E-04 |
| XP_024305924.1 | COX4I1   | cytochrome c oxidase subunit 4 isoform 1, mitochondrial isoform X1    | 1.01 | 1.03 | 1.04 | 1.02 | 8.34E-01 | 7.70E-01 | 4.23E-01 | 2.95E-01 |
| NP_000365.3    | UROD     | uroporphyrinogen decarboxylase                                        | 1.02 | 0.98 | 0.99 | 0.92 | 4.94E-01 | 3.76E-01 | 5.08E-01 | 3.83E-01 |
| NP_000148.2    | GBA      | lysosomal acid glucosylceramidase isoform 1 precursor                 | 0.94 | 0.95 | 0.90 | 1.07 | 1.36E-02 | 1.08E-03 | 8.37E-01 | 7.70E-01 |
| NP_001357590.1 | CUL1     | cullin-1                                                              | 1.12 | 1.13 | 1.27 | 1.05 | 3.89E-02 | 8.12E-03 | 8.97E-01 | 8.51E-01 |
| NP_005115.2    | NUP153   | nuclear pore complex protein Nup153 isoform 2                         | 0.93 | 1.02 | 0.95 | 0.98 | 1.44E-01 | 6.90E-02 | 1.60E-01 | 6.78E-02 |
| NP_004190.1    | P4HA2    | prolyl 4-hydroxylase subunit alpha-2 isoform 1 precursor              | 0.94 | 1.03 | 0.97 | 1.08 | 2.24E-01 | 1.28E-01 | 1.95E-01 | 9.31E-02 |
| XP_005247645.1 | CDV3     | protein CDV3 homolog isoform X1                                       | 0.90 | 1.05 | 0.95 | 0.97 | 1.12E-01 | 4.76E-02 | 9.38E-02 | 2.63E-02 |
| NP_002737.2    | MAPK3    | mitogen-activated protein kinase 3 isoform 1                          | 1.04 | 0.96 | 1.00 | 0.98 | 4.96E-01 | 3.78E-01 | 3.24E-01 | 1.99E-01 |
| NP_510868.1    | BCCIP    | BRCA2 and CDKN1A-interacting protein isoform BCCIPbeta                | 1.04 | 0.89 | 0.93 | 1.07 | 5.29E-01 | 4.14E-01 | 1.45E-01 | 5.74E-02 |
| XP_011528297.1 | EWSR1    | RNA-binding protein EWS isoform X1                                    | 0.67 | 1.08 | 0.72 | 0.73 | 2.55E-02 | 3.66E-03 | 4.43E-02 | 3.28E-03 |
| NP_004111.2    | GBP2     | guanylate-binding protein 2                                           | 0.97 | 1.00 | 0.97 | 1.08 | 3.48E-01 | 2.32E-01 | 4.92E-01 | 3.66E-01 |
| NP_002721.1    | PRKACA   | cAMP-dependent protein kinase catalytic subunit alpha isoform Calpha1 | 0.97 | 1.03 | 1.00 | 1.00 | 5.66E-01 | 4.56E-01 | 3.65E-01 | 2.36E-01 |
| NP_064504.2    | ZC3HAV1  | zinc finger CCCH-type antiviral protein 1 isoform 1                   | 1.02 | 1.01 | 1.03 | 1.04 | 5.63E-01 | 4.52E-01 | 7.88E-01 | 7.10E-01 |
| NP_004243.1    | SLC9A3R1 | Na(+)/H(+) exchange regulatory cofactor NHE-RF1                       | 0.92 | 1.05 | 0.97 | 1.05 | 1.27E-02 | 9.22E-04 | 3.53E-02 | 1.23E-03 |
| NP_005361.2    | RAB8A    | ras-related protein Rab-8A                                            | 1.12 | 1.02 | 1.14 | 1.03 | 1.08E-01 | 4.51E-02 | 3.07E-01 | 1.83E-01 |

|                |          |                                                                            |      |      |      |      |          |          |          |          |
|----------------|----------|----------------------------------------------------------------------------|------|------|------|------|----------|----------|----------|----------|
| NP_001358418.1 | GET3     | ATPase ASNA1                                                               | 1.05 | 1.04 | 1.09 | 1.03 | 1.13E-01 | 4.78E-02 | 8.38E-01 | 7.72E-01 |
| NP_006451.1    | HEXIM1   | protein HEXIM1                                                             | 0.88 | 0.97 | 0.85 | 0.96 | 1.51E-02 | 1.37E-03 | 8.42E-02 | 2.04E-02 |
| XP_016857741.1 | LUZP1    | leucine zipper protein 1 isoform X1                                        | 0.91 | 1.03 | 0.94 | 0.99 | 8.82E-02 | 3.29E-02 | 8.35E-02 | 2.00E-02 |
| NP_003042.3    | SLC16A1  | monocarboxylate transporter 1                                              | 1.05 | 1.04 | 1.10 | 1.10 | 3.99E-01 | 2.78E-01 | 9.21E-01 | 8.86E-01 |
| XP_005247519.1 | MBNL1    | muscleblind-like protein 1 isoform X3                                      | 1.13 | 0.99 | 1.11 | 1.17 | 4.50E-01 | 3.31E-01 | 5.41E-01 | 4.19E-01 |
| NP_005549.2    | LAD1     | ladinin-1                                                                  | 0.99 | 1.02 | 1.01 | 1.04 | 9.29E-01 | 8.98E-01 | 7.37E-01 | 6.47E-01 |
| XP_011527126.1 | NFATC2   | nuclear factor of activated T-cells, cytoplasmic 2 isoform X1              | 0.94 | 0.91 | 0.86 | 1.02 | 2.70E-01 | 1.67E-01 | 7.23E-01 | 6.27E-01 |
| NP_877423.1    | MCM4     | DNA replication licensing factor MCM4                                      | 0.87 | 0.93 | 0.81 | 0.98 | 2.02E-01 | 1.11E-01 | 4.66E-01 | 3.38E-01 |
| NP_002220.1    | JUNB     | transcription factor jun-B                                                 | 0.97 | 0.93 | 0.90 | 1.02 | 4.07E-01 | 2.87E-01 | 5.35E-01 | 4.12E-01 |
| NP_001265190.1 | CARHSP1  | calcium-regulated heat-stable protein 1                                    | 0.87 | 0.98 | 0.85 | 0.89 | 1.11E-02 | 6.87E-04 | 4.39E-02 | 3.01E-03 |
| NP_006704.3    | SUB1     | activated RNA polymerase II transcriptional coactivator p15                | 0.94 | 0.91 | 0.86 | 1.06 | 4.12E-03 | 1.05E-04 | 3.45E-02 | 1.05E-03 |
| NP_055946.1    | WDR43    | WD repeat-containing protein 43                                            | 0.98 | 1.00 | 0.98 | 1.07 | 1.58E-01 | 7.86E-02 | 4.78E-01 | 3.51E-01 |
| NP_001015509.1 | PTRH2    | peptidyl-tRNA hydrolase 2, mitochondrial isoform a                         | 1.07 | 0.99 | 1.07 | 1.04 | 3.11E-01 | 1.99E-01 | 3.66E-01 | 2.37E-01 |
| NP_001307582.1 | NUP88    | nuclear pore complex protein Nup88 isoform 1                               | 1.03 | 0.97 | 0.99 | 0.99 | 2.48E-01 | 1.47E-01 | 2.31E-01 | 1.18E-01 |
| NP_000353.1    | TIMP3    | metalloproteinase inhibitor 3 precursor                                    | 1.18 | 0.87 | 1.02 | 1.07 | 2.07E-02 | 2.55E-03 | 3.53E-02 | 1.68E-03 |
| XP_005253223.1 | ARFGAP2  | ADP-ribosylation factor GTPase-activating protein 2 isoform X1             | 1.01 | 0.99 | 1.00 | 1.08 | 9.52E-02 | 3.66E-02 | 1.36E-01 | 5.11E-02 |
| NP_001257817.1 | SLC25A10 | mitochondrial dicarboxylate carrier isoform 1                              | 1.07 | 0.97 | 1.03 | 1.09 | 1.39E-01 | 6.55E-02 | 1.63E-01 | 6.97E-02 |
| NP_004291.1    | ACP1     | low molecular weight phosphotyrosine protein phosphatase isoform c         | 1.08 | 0.98 | 1.06 | 1.05 | 1.41E-01 | 6.64E-02 | 1.27E-01 | 4.50E-02 |
| NP_003674.1    | RRP1     | ribosomal RNA processing protein 1 homolog A                               | 1.02 | 1.03 | 1.05 | 1.04 | 2.64E-01 | 1.61E-01 | 8.53E-01 | 7.94E-01 |
| NP_853551.1    | RFC4     | replication factor C subunit 4                                             | 1.03 | 0.97 | 1.00 | 1.07 | 1.57E-01 | 7.81E-02 | 1.27E-01 | 4.57E-02 |
| NP_004554.3    | PCK2     | phosphoenolpyruvate carboxykinase [GTP], mitochondrial isoform 1 precursor | 1.10 | 1.01 | 1.11 | 1.12 | 1.49E-01 | 7.24E-02 | 2.31E-01 | 1.18E-01 |
| XP_024307582.1 | ADRM1    | proteasomal ubiquitin receptor ADRM1 isoform X1                            | 1.00 | 0.97 | 0.97 | 1.03 | 9.10E-01 | 8.71E-01 | 2.38E-01 | 1.24E-01 |
| NP_006319.1    | RBM14    | RNA-binding protein 14 isoform 1                                           | 1.07 | 0.98 | 1.05 | 1.03 | 3.94E-02 | 8.41E-03 | 5.00E-02 | 4.99E-03 |
| NP_002746.1    | MAP2K1   | dual specificity mitogen-activated protein kinase kinase 1                 | 1.03 | 0.93 | 0.95 | 1.00 | 9.38E-01 | 9.10E-01 | 7.29E-01 | 6.34E-01 |
| NP_005893.1    | SMAD3    | mothers against decapentaplegic homolog 3 isoform 1                        | 1.06 | 0.93 | 0.99 | 1.05 | 5.92E-01 | 4.83E-01 | 4.06E-01 | 2.77E-01 |
| NP_000928.1    | POLR2A   | DNA-directed RNA polymerase II subunit RPB1                                | 1.00 | 1.01 | 1.01 | 1.05 | 7.41E-01 | 6.57E-01 | 7.40E-01 | 6.51E-01 |
| XP_006719119.1 | A2M      | alpha-2-macroglobulin isoform X1                                           | 0.99 | 0.92 | 0.92 | 1.22 | 9.42E-01 | 9.17E-01 | 7.75E-01 | 6.92E-01 |
| NP_473357.1    | SRSF10   | serine/arginine-rich splicing factor 10 isoform 2                          | 0.91 | 0.98 | 0.89 | 0.96 | 5.70E-02 | 1.67E-02 | 1.06E-01 | 3.24E-02 |
| XP_024307564.1 | TECR     | very-long-chain enoyl-CoA reductase isoform X8                             | 1.06 | 0.92 | 0.97 | 0.99 | 1.75E-01 | 9.07E-02 | 8.43E-02 | 2.05E-02 |
| NP_116120.1    | TXNDC17  | thioredoxin domain-containing protein 17                                   | 1.04 | 0.99 | 1.03 | 1.01 | 5.39E-01 | 4.25E-01 | 4.67E-01 | 3.39E-01 |
| NP_001146.2    | ANXA6    | annexin A6 isoform 1                                                       | 1.05 | 1.03 | 1.08 | 1.09 | 5.37E-01 | 4.22E-01 | 8.37E-01 | 7.72E-01 |
| NP_060522.3    | VAC14    | protein VAC14 homolog isoform 1                                            | 1.03 | 1.04 | 1.06 | 1.01 | 7.49E-01 | 6.68E-01 | 9.27E-01 | 8.96E-01 |
| NP_061820.1    | CYCS     | cytochrome c                                                               | 1.03 | 0.83 | 0.86 | 1.08 | 6.68E-01 | 5.71E-01 | 1.38E-01 | 5.24E-02 |
| NP_004272.2    | BAG3     | BAG family molecular chaperone regulator 3                                 | 0.88 | 1.05 | 0.92 | 1.08 | 1.18E-01 | 5.15E-02 | 1.87E-01 | 8.71E-02 |
| NP_003240.1    | THOP1    | thimet oligopeptidase                                                      | 1.06 | 0.98 | 1.04 | 0.99 | 8.74E-02 | 3.25E-02 | 1.17E-01 | 3.89E-02 |
| NP_036560.1    | NPTN     | neuroplastin isoform b precursor                                           | 0.97 | 1.00 | 0.97 | 0.99 | 1.98E-01 | 1.09E-01 | 2.31E-01 | 1.18E-01 |
| NP_490597.1    | BRD4     | bromodomain-containing protein 4 isoform long                              | 0.99 | 0.96 | 0.95 | 1.04 | 7.96E-01 | 7.24E-01 | 6.89E-01 | 5.87E-01 |
| NP_001041659.1 | RCC1     | regulator of chromosome condensation isoform a                             | 1.12 | 0.96 | 1.08 | 1.00 | 1.40E-01 | 6.59E-02 | 1.29E-01 | 4.68E-02 |
| XP_005253650.1 | CLIP1    | CAP-Gly domain-containing linker protein 1 isoform X1                      | 0.99 | 1.10 | 1.09 | 1.09 | 1.44E-01 | 6.84E-02 | 2.90E-01 | 1.69E-01 |
| NP_005751.2    | CEBPZ    | CCAAT/enhancer-binding protein zeta                                        | 1.02 | 1.04 | 1.06 | 1.02 | 7.94E-01 | 7.22E-01 | 8.53E-01 | 7.94E-01 |
| NP_065108.1    | TIGAR    | fructose-2,6-bisphosphatase TIGAR                                          | 1.12 | 0.94 | 1.06 | 1.09 | 9.92E-02 | 3.93E-02 | 1.08E-01 | 3.35E-02 |
| XP_011516104.1 | ALDH1B1  | aldehyde dehydrogenase X, mitochondrial isoform X1                         | 1.05 | 0.98 | 1.02 | 1.08 | 7.00E-01 | 6.10E-01 | 5.68E-01 | 4.51E-01 |
| XP_016868173.1 | ARMC10   | armadillo repeat-containing protein 10 isoform X1                          | 1.12 | 0.95 | 1.06 | 1.05 | 1.35E-01 | 6.28E-02 | 1.41E-01 | 5.44E-02 |
| NP_055958.2    | METAP1   | methionine aminopeptidase 1                                                | 1.04 | 0.99 | 1.03 | 0.99 | 1.27E-01 | 5.71E-02 | 2.45E-01 | 1.30E-01 |
| XP_016884904.1 | GPKOW    | G-patch domain and KOW motifs-containing protein isoform X1                | 0.98 | 1.00 | 0.98 | 1.00 | 5.17E-01 | 4.02E-01 | 6.40E-01 | 5.29E-01 |
| NP_057390.1    | DNAJB11  | dnaj homolog subfamily B member 11 precursor                               | 1.00 | 1.02 | 1.02 | 1.01 | 9.92E-01 | 9.90E-01 | 9.27E-01 | 8.97E-01 |
| NP_001278357.1 | BAX      | apoptosis regulator BAX isoform 1                                          | 0.95 | 1.12 | 1.06 | 1.03 | 2.27E-02 | 2.93E-03 | 1.38E-01 | 5.24E-02 |

|                |          |                                                                                     |      |      |      |      |          |          |          |          |
|----------------|----------|-------------------------------------------------------------------------------------|------|------|------|------|----------|----------|----------|----------|
| NP_001005353.1 | AK4      | adenylate kinase 4, mitochondrial isoform a                                         | 1.05 | 1.00 | 1.05 | 1.10 | 7.81E-02 | 2.71E-02 | 3.22E-01 | 1.97E-01 |
| NP_003932.3    | WASL     | neural Wiskott-Aldrich syndrome protein                                             | 1.00 | 1.02 | 1.02 | 1.04 | 9.38E-01 | 9.11E-01 | 4.24E-01 | 2.96E-01 |
| NP_001308969.1 | NUTF2    | nuclear transport factor 2                                                          | 1.16 | 0.95 | 1.10 | 1.06 | 9.63E-03 | 4.89E-04 | 4.55E-02 | 3.64E-03 |
| NP_036249.1    | CBX5     | chromobox protein homolog 5                                                         | 0.74 | 0.99 | 0.73 | 0.88 | 2.65E-02 | 3.95E-03 | 6.32E-02 | 1.01E-02 |
| NP_714941.1    | NUP62    | nuclear pore glycoprotein p62                                                       | 0.98 | 0.98 | 0.96 | 1.07 | 4.37E-01 | 3.17E-01 | 9.66E-01 | 9.51E-01 |
| NP_006378.3    | CHERP    | calcium homeostasis endoplasmic reticulum protein                                   | 0.97 | 1.07 | 1.04 | 1.02 | 6.25E-01 | 5.20E-01 | 5.35E-01 | 4.12E-01 |
| NP_003783.1    | EDF1     | endothelial differentiation-related factor 1 isoform alpha                          | 0.77 | 1.05 | 0.81 | 1.04 | 2.20E-02 | 2.80E-03 | 5.34E-02 | 6.29E-03 |
| NP_001317259.1 | LUC7L3   | luc7-like protein 3 isoform 2                                                       | 0.99 | 0.94 | 0.93 | 0.97 | 5.87E-01 | 4.78E-01 | 1.70E-01 | 7.44E-02 |
| NP_036557.1    | RSU1     | ras suppressor protein 1 isoform 1                                                  | 1.04 | 0.96 | 1.00 | 0.99 | 6.28E-02 | 1.95E-02 | 5.97E-02 | 8.84E-03 |
| NP_004115.1    | GMFB     | glia maturation factor beta                                                         | 0.95 | 1.01 | 0.96 | 1.04 | 1.06E-01 | 4.35E-02 | 1.11E-01 | 3.50E-02 |
| XP_005270419.1 | PPIH     | peptidyl-prolyl cis-trans isomerase H isoform X1                                    | 0.98 | 1.03 | 1.01 | 1.00 | 5.93E-01 | 4.86E-01 | 4.21E-01 | 2.93E-01 |
| NP_150093.1    | PURB     | transcriptional activator protein Pur-beta                                          | 1.02 | 0.98 | 0.99 | 1.00 | 7.18E-01 | 6.30E-01 | 4.55E-01 | 3.27E-01 |
| NP_597680.2    | ASNS     | asparagine synthetase [glutamine-hydrolyzing] isoform a                             | 1.01 | 1.12 | 1.13 | 1.12 | 2.59E-01 | 1.57E-01 | 5.97E-02 | 8.85E-03 |
| XP_005246247.1 | ROCK2    | rho-associated protein kinase 2 isoform X1                                          | 1.00 | 1.04 | 1.04 | 1.01 | 9.43E-01 | 9.18E-01 | 5.97E-01 | 4.82E-01 |
| NP_008868.3    | SUMO2    | small ubiquitin-related modifier 2 isoform a precursor                              | 0.83 | 1.05 | 0.88 | 0.88 | 3.80E-02 | 7.78E-03 | 6.16E-02 | 9.66E-03 |
| NP_001265485.1 | ARPC3    | actin-related protein 2/3 complex subunit 3 isoform 1                               | 1.09 | 0.98 | 1.06 | 1.05 | 1.39E-01 | 6.53E-02 | 1.34E-01 | 4.98E-02 |
| NP_063940.1    | DIABLO   | diablo homolog, mitochondrial isoform 1 precursor                                   | 0.99 | 0.94 | 0.93 | 1.02 | 5.88E-01 | 4.80E-01 | 2.85E-01 | 1.64E-01 |
| NP_057006.1    | NSDHL    | sterol-4-alpha-carboxylate 3-dehydrogenase, decarboxylating                         | 1.00 | 1.06 | 1.06 | 1.01 | 9.52E-01 | 9.31E-01 | 5.67E-01 | 4.48E-01 |
| XP_005265738.1 | GRSF1    | G-rich sequence factor 1 isoform X1                                                 | 0.90 | 1.19 | 1.07 | 1.02 | 9.65E-02 | 3.74E-02 | 6.07E-02 | 9.32E-03 |
| NP_057439.2    | DDX47    | probable ATP-dependent RNA helicase DDX47 isoform 1                                 | 1.18 | 0.91 | 1.08 | 1.01 | 6.70E-02 | 2.14E-02 | 7.52E-02 | 1.57E-02 |
| NP_001093631.1 | XPO7     | exportin-7 isoform a                                                                | 1.08 | 0.92 | 1.00 | 1.03 | 2.02E-01 | 1.11E-01 | 1.05E-01 | 3.21E-02 |
| NP_001316681.1 | FAM136A  | protein FAM136A isoform 2                                                           | 0.99 | 0.96 | 0.96 | 1.06 | 7.38E-01 | 6.54E-01 | 3.49E-01 | 2.22E-01 |
| NP_037377.1    | VPS4A    | vacuolar protein sorting-associated protein 4A                                      | 0.87 | 1.17 | 1.02 | 0.95 | 9.74E-02 | 3.79E-02 | 6.08E-02 | 9.38E-03 |
| NP_002766.1    | HTRA1    | serine protease HTRA1 precursor                                                     | 1.06 | 0.96 | 1.02 | 0.94 | 7.35E-02 | 2.46E-02 | 6.73E-02 | 1.20E-02 |
| NP_002703.1    | PPP1R7   | protein phosphatase 1 regulatory subunit 7 isoform 1                                | 1.09 | 0.95 | 1.03 | 1.11 | 2.60E-02 | 3.83E-03 | 1.03E-01 | 3.09E-02 |
| NP_002813.3    | TWF1     | twinfilin-1 isoform 2                                                               | 0.97 | 1.02 | 0.98 | 1.06 | 1.53E-01 | 7.51E-02 | 1.21E-01 | 4.15E-02 |
| NP_001308984.1 | PDE1C    | calcium/calmodulin-dependent 3',5'-cyclic nucleotide phosphodiesterase 1C isoform 2 | 0.96 | 0.86 | 0.83 | 0.86 | 9.45E-02 | 3.63E-02 | 1.90E-01 | 8.93E-02 |
| NP_055398.1    | LMCD1    | LIM and cysteine-rich domains protein 1 isoform 1                                   | 0.98 | 1.10 | 1.07 | 1.09 | 5.99E-01 | 4.92E-01 | 1.38E-01 | 5.28E-02 |
| NP_057071.2    | HEBP1    | heme-binding protein 1                                                              | 1.05 | 1.04 | 1.09 | 1.10 | 3.95E-01 | 2.75E-01 | 9.27E-01 | 8.95E-01 |
| NP_064628.1    | TOMM22   | mitochondrial import receptor subunit TOM22 homolog                                 | 1.08 | 0.91 | 0.98 | 1.03 | 4.18E-02 | 9.34E-03 | 5.64E-02 | 7.44E-03 |
| NP_056229.2    | RPL36    | 60S ribosomal protein L36                                                           | 0.89 | 1.06 | 0.94 | 0.93 | 2.82E-02 | 4.36E-03 | 4.40E-02 | 3.04E-03 |
| NP_001474.1    | NIPSNAP2 | protein NipSnap homolog 2 isoform 1                                                 | 1.10 | 0.96 | 1.06 | 1.02 | 1.86E-02 | 2.06E-03 | 3.62E-02 | 1.81E-03 |
| XP_016864680.1 | SLC26A2  | sulfate transporter isoform X1                                                      | 0.86 | 0.90 | 0.77 | 1.01 | 3.12E-01 | 2.01E-01 | 7.31E-01 | 6.38E-01 |
| XP_024304262.1 | ILK      | integrin-linked protein kinase isoform X1                                           | 1.04 | 0.92 | 0.96 | 1.00 | 1.05E-01 | 4.32E-02 | 5.00E-02 | 5.06E-03 |
| NP_060542.4    | HEATR1   | HEAT repeat-containing protein 1                                                    | 1.04 | 0.98 | 1.02 | 1.06 | 2.03E-01 | 1.12E-01 | 3.35E-01 | 2.09E-01 |
| NP_060592.2    | DARS2    | aspartate--tRNA ligase, mitochondrial isoform 1                                     | 1.01 | 0.94 | 0.96 | 1.04 | 1.97E-01 | 1.07E-01 | 6.59E-02 | 1.11E-02 |
| NP_004613.1    | TSN      | translin isoform 1                                                                  | 1.10 | 0.98 | 1.08 | 1.05 | 4.83E-02 | 1.22E-02 | 1.45E-01 | 5.69E-02 |
| NP_000453.2    | UBE3A    | ubiquitin-protein ligase E3A isoform 2                                              | 1.08 | 0.96 | 1.03 | 1.05 | 2.04E-01 | 1.13E-01 | 1.44E-01 | 5.65E-02 |
| NP_005981.3    | STK10    | serine/threonine-protein kinase 10                                                  | 0.99 | 1.01 | 1.00 | 1.07 | 2.08E-01 | 1.16E-01 | 5.33E-01 | 4.09E-01 |
| NP_004374.1    | CSK      | tyrosine-protein kinase CSK                                                         | 1.13 | 1.01 | 1.15 | 1.03 | 1.11E-01 | 4.66E-02 | 1.88E-01 | 8.75E-02 |
| NP_001284529.1 | HSPBP1   | hsp70-binding protein 1 isoform 1                                                   | 1.11 | 0.88 | 0.98 | 0.97 | 9.94E-02 | 3.94E-02 | 7.88E-02 | 1.72E-02 |
| NP_001122388.1 | TOMM40   | mitochondrial import receptor subunit TOM40 homolog                                 | 1.15 | 0.90 | 1.03 | 1.06 | 1.42E-01 | 6.73E-02 | 9.39E-02 | 2.63E-02 |
| NP_061845.2    | GDAP1    | ganglioside-induced differentiation-associated protein 1 isoform a                  | 1.14 | 0.98 | 1.12 | 1.16 | 1.25E-01 | 5.61E-02 | 1.54E-01 | 6.29E-02 |
| NP_000981.1    | RPL27A   | 60S ribosomal protein L27a                                                          | 0.97 | 1.08 | 1.05 | 0.92 | 5.80E-01 | 4.71E-01 | 1.83E-01 | 8.40E-02 |
| XP_005245303.1 | UCHL5    | ubiquitin carboxyl-terminal hydrolase isozyme L5 isoform X5                         | 1.10 | 0.91 | 1.00 | 1.01 | 1.11E-01 | 4.65E-02 | 6.77E-02 | 1.22E-02 |
| NP_036313.3    | FKBP8    | peptidyl-prolyl cis-trans isomerase FKBP8 isoform 1                                 | 0.96 | 0.89 | 0.86 | 1.01 | 6.95E-02 | 2.25E-02 | 1.34E-01 | 4.97E-02 |
| NP_002790.1    | PSMB7    | proteasome subunit beta type-7 precursor                                            | 1.09 | 1.02 | 1.11 | 1.07 | 1.42E-02 | 1.14E-03 | 9.18E-02 | 2.52E-02 |

|                |              |                                                                                |      |      |      |      |          |          |          |          |
|----------------|--------------|--------------------------------------------------------------------------------|------|------|------|------|----------|----------|----------|----------|
| NP_006467.4    | ATP5MG       | ATP synthase subunit g, mitochondrial                                          | 1.14 | 0.88 | 1.00 | 1.02 | 5.81E-02 | 1.72E-02 | 9.12E-02 | 2.49E-02 |
| NP_004619.3    | XPC          | DNA repair protein complementing XP-C cells                                    | 0.95 | 0.91 | 0.86 | 1.03 | 8.24E-02 | 2.98E-02 | 1.39E-01 | 5.32E-02 |
| NP_003906.2    | CPNE1        | copine-1 isoform b                                                             | 1.03 | 1.04 | 1.07 | 1.12 | 7.02E-02 | 2.30E-02 | 2.79E-01 | 1.59E-01 |
| NP_006766.1    | QKI          | protein quaking isoform 1                                                      | 1.09 | 0.86 | 0.93 | 1.06 | 4.08E-01 | 2.88E-01 | 2.47E-01 | 1.31E-01 |
| NP_001358001.1 | USP11        | ubiquitin carboxyl-terminal hydrolase 11                                       | 0.97 | 0.86 | 0.83 | 1.01 | 2.73E-01 | 1.69E-01 | 7.18E-02 | 1.42E-02 |
| NP_075068.2    | NOL6         | nucleolar protein 6 isoform alpha                                              | 1.21 | 0.95 | 1.14 | 1.05 | 7.46E-02 | 2.53E-02 | 1.21E-01 | 4.15E-02 |
| NP_620073.2    | GNAO1        | guanine nucleotide-binding protein G(o) subunit alpha isoform b                | 1.03 | 0.99 | 1.01 | 1.06 | 8.73E-01 | 8.22E-01 | 8.22E-01 | 7.51E-01 |
| NP_001166599.1 | YTHDF2       | YTH domain-containing family protein 2 isoform 1                               | 0.91 | 1.01 | 0.92 | 1.08 | 3.59E-02 | 6.97E-03 | 6.85E-02 | 1.26E-02 |
| NP_001303903.1 | LZIC         | protein LZIC isoform b                                                         | 0.86 | 1.06 | 0.91 | 1.00 | 2.03E-01 | 1.12E-01 | 1.98E-01 | 9.51E-02 |
| NP_056338.2    | REXO2        | oligoribonuclease, mitochondrial precursor                                     | 1.03 | 0.94 | 0.97 | 1.08 | 4.83E-01 | 3.66E-01 | 1.56E-01 | 6.50E-02 |
| XP_016872264.1 | PRXL2A       | peroxiredoxin-like 2A isoform X1                                               | 1.05 | 0.98 | 1.02 | 1.01 | 4.60E-01 | 3.41E-01 | 4.24E-01 | 2.96E-01 |
| XP_016875938.1 | PDS5B        | sister chromatid cohesion protein PDS5 homolog B isoform X1                    | 0.98 | 0.95 | 0.93 | 1.01 | 1.62E-01 | 8.19E-02 | 1.73E-01 | 7.66E-02 |
| NP_056377.1    | UBXN7        | UBX domain-containing protein 7                                                | 0.97 | 1.01 | 0.98 | 1.06 | 4.47E-01 | 3.27E-01 | 5.21E-01 | 3.97E-01 |
| NP_872353.2    | TMED4        | transmembrane emp24 domain-containing protein 4 isoform 1 precursor            | 1.17 | 1.01 | 1.17 | 1.05 | 2.86E-02 | 4.54E-03 | 5.17E-02 | 5.59E-03 |
| XP_005251150.1 | CPNE3        | copine-3 isoform X1                                                            | 1.07 | 1.00 | 1.07 | 1.05 | 2.10E-02 | 2.59E-03 | 5.34E-02 | 6.31E-03 |
| NP_001305832.1 | TPD52L1      | tumor protein D53 isoform 7                                                    | 0.96 | 1.01 | 0.97 | 1.06 | 3.38E-02 | 6.22E-03 | 1.27E-01 | 4.54E-02 |
| NP_008864.4    | SLC5A3       | sodium/myo-inositol cotransporter                                              | 0.96 | 0.82 | 0.78 | 0.89 | 3.53E-01 | 2.36E-01 | 1.29E-01 | 4.68E-02 |
| NP_005144.2    | USP10        | ubiquitin carboxyl-terminal hydrolase 10 isoform 2                             | 1.00 | 0.97 | 0.97 | 1.01 | 7.83E-01 | 7.07E-01 | 3.71E-01 | 2.42E-01 |
| NP_001350301.1 | CWC15        | spliceosome-associated protein CWC15 homolog                                   | 0.85 | 0.98 | 0.83 | 1.01 | 1.66E-02 | 1.67E-03 | 1.15E-01 | 3.82E-02 |
| NP_003083.1    | SNRPB2       | U2 small nuclear ribonucleoprotein B"                                          | 0.95 | 1.00 | 0.95 | 0.99 | 1.29E-01 | 5.87E-02 | 1.47E-01 | 5.81E-02 |
| NP_002387.1    | ME2          | NAD-dependent malic enzyme, mitochondrial isoform 1 precursor                  | 1.13 | 0.99 | 1.12 | 1.09 | 2.48E-01 | 1.47E-01 | 4.07E-01 | 2.78E-01 |
| NP_009166.2    | XPOT         | exportin-T                                                                     | 1.00 | 0.95 | 0.94 | 0.95 | 9.57E-01 | 9.38E-01 | 7.44E-01 | 6.55E-01 |
| NP_004086.1    | EIF4EBP1     | eukaryotic translation initiation factor 4E-binding protein 1                  | 0.83 | 0.94 | 0.78 | 1.07 | 2.34E-01 | 1.35E-01 | 3.99E-01 | 2.69E-01 |
| NP_127460.1    | GAR1         | H/ACA ribonucleoprotein complex subunit 1                                      | 1.04 | 0.96 | 1.00 | 1.05 | 2.55E-01 | 1.53E-01 | 2.09E-01 | 1.02E-01 |
| NP_003126.1    | SRP19        | signal recognition particle 19 kDa protein isoform 1                           | 1.05 | 1.06 | 1.11 | 1.03 | 4.63E-01 | 3.45E-01 | 9.27E-01 | 8.96E-01 |
| NP_001307143.1 | SRSF5        | serine/arginine-rich splicing factor 5                                         | 1.22 | 0.96 | 1.17 | 0.95 | 3.50E-01 | 2.34E-01 | 3.45E-01 | 2.17E-01 |
| NP_061980.1    | MYDGF        | myeloid-derived growth factor precursor                                        | 1.33 | 0.98 | 1.31 | 1.19 | 2.16E-02 | 2.71E-03 | 1.46E-01 | 5.79E-02 |
| NP_777549.1    | NDUFAF2      | NADH dehydrogenase [ubiquinone] 1 alpha subcomplex assembly factor 2           | 0.98 | 1.06 | 1.03 | 1.05 | 5.06E-01 | 3.90E-01 | 1.75E-01 | 7.85E-02 |
| NP_056281.1    | PTPN23       | tyrosine-protein phosphatase non-receptor type 23 isoform 1                    | 1.15 | 0.89 | 1.02 | 1.08 | 1.78E-02 | 1.90E-03 | 3.45E-02 | 1.07E-03 |
| NP_004292.1    | ACTL6A       | actin-like protein 6A isoform 1                                                | 0.78 | 1.24 | 0.96 | 0.91 | 2.07E-01 | 1.15E-01 | 1.28E-01 | 4.62E-02 |
| NP_075384.4    | KRI1         | protein KRI1 homolog                                                           | 0.88 | 1.05 | 0.92 | 0.97 | 1.27E-02 | 9.21E-04 | 9.73E-02 | 2.79E-02 |
| NP_000091.1    | CSTB         | cystatin-B                                                                     | 1.26 | 0.84 | 1.05 | 1.16 | 1.42E-01 | 6.78E-02 | 9.02E-02 | 2.40E-02 |
| NP_002803.2    | PSMD8        | 26S proteasome non-ATPase regulatory subunit 8                                 | 1.09 | 0.96 | 1.04 | 0.99 | 1.27E-01 | 5.73E-02 | 1.41E-01 | 5.42E-02 |
| NP_055892.2    | SARM1        | sterile alpha and TIR motif-containing protein 1 precursor                     | 1.04 | 0.92 | 0.96 | 1.02 | 5.79E-01 | 4.70E-01 | 2.16E-01 | 1.08E-01 |
| XP_016860744.1 | LRRFIP1      | leucine-rich repeat flightless-interacting protein 1 isoform X3                | 0.99 | 0.96 | 0.92 | 1.00 | 9.34E-01 | 9.04E-01 | 9.54E-01 | 9.34E-01 |
| NP_001015877.1 | PHF6         | PHD finger protein 6 isoform 1                                                 | 1.02 | 0.95 | 0.97 | 1.05 | 1.72E-01 | 8.91E-02 | 1.60E-01 | 6.81E-02 |
| NP_000294.1    | PMM2         | phosphomannomutase 2                                                           | 1.11 | 1.02 | 1.13 | 1.07 | 1.94E-01 | 1.05E-01 | 2.90E-01 | 1.68E-01 |
| NP_065797.2    | MAVS         | mitochondrial antiviral-signaling protein isoform 1                            | 0.99 | 1.02 | 1.01 | 1.02 | 9.26E-01 | 8.90E-01 | 8.25E-01 | 7.54E-01 |
| XP_016871599.1 | ANK3         | ankyrin-3 isoform X1                                                           | 1.01 | 0.98 | 0.99 | 1.06 | 6.35E-01 | 5.32E-01 | 4.13E-01 | 2.85E-01 |
| NP_060864.1    | ABHD10       | mycophenolic acid acyl-glucuronide esterase, mitochondrial isoform 1 precursor | 1.12 | 0.89 | 0.99 | 1.01 | 6.35E-02 | 1.98E-02 | 5.12E-02 | 5.48E-03 |
| NP_001357294.1 | LOC114841035 | peptidyl-prolyl cis-trans isomerase FKBP2 isoform 2                            | 1.01 | 1.04 | 1.05 | 1.03 | 8.61E-01 | 8.04E-01 | 6.25E-01 | 5.13E-01 |
| XP_016879276.2 | GLYR1        | putative oxidoreductase GLYR1 isoform X2                                       | 0.97 | 1.00 | 0.97 | 1.07 | 6.13E-01 | 5.08E-01 | 6.21E-01 | 5.08E-01 |
| NP_036465.2    | MYCBP        | C-Myc-binding protein                                                          | 0.88 | 0.97 | 0.85 | 0.97 | 6.61E-02 | 2.10E-02 | 1.63E-01 | 6.99E-02 |
| NP_001140.2    | ANK3         | ankyrin-3 isoform 2                                                            | 0.82 | 1.02 | 0.80 | 1.06 | 5.65E-01 | 4.54E-01 | 6.09E-01 | 4.95E-01 |
| NP_057004.1    | RPS27L       | 40S ribosomal protein S27-like                                                 | 1.09 | 0.97 | 1.06 | 1.06 | 1.23E-01 | 5.50E-02 | 1.55E-01 | 6.41E-02 |
| XP_005261752.1 | RANGAP1      | ran GTPase-activating protein 1 isoform X1                                     | 1.00 | 1.01 | 1.01 | 1.03 | 9.90E-01 | 9.87E-01 | 9.10E-01 | 8.68E-01 |
| NP_056146.1    | NCSTN        | nicastrin isoform 1 precursor                                                  | 0.91 | 0.93 | 0.85 | 1.15 | 2.12E-01 | 1.19E-01 | 6.47E-01 | 5.37E-01 |

|                |              |                                                                                               |      |      |      |      |          |          |          |          |
|----------------|--------------|-----------------------------------------------------------------------------------------------|------|------|------|------|----------|----------|----------|----------|
| XP_011538278.1 | TM9SF3       | transmembrane 9 superfamily member 3 isoform X1                                               | 1.09 | 0.85 | 0.92 | 1.06 | 4.24E-02 | 9.62E-03 | 3.97E-02 | 2.29E-03 |
| NP_001278233.1 | NDUFA5       | NADH dehydrogenase [ubiquinone] 1 alpha subcomplex subunit 5 isoform 6                        | 1.05 | 0.93 | 0.97 | 1.09 | 3.47E-01 | 2.31E-01 | 2.39E-01 | 1.25E-01 |
| NP_001171904.1 | PACSN3       | protein kinase C and casein kinase substrate in neurons protein 3                             | 1.02 | 1.00 | 1.01 | 1.08 | 8.73E-01 | 8.22E-01 | 8.33E-01 | 7.66E-01 |
| NP_002895.3    | NELFE        | negative elongation factor E                                                                  | 0.90 | 0.94 | 0.85 | 0.98 | 1.79E-02 | 1.92E-03 | 9.82E-02 | 2.84E-02 |
| NP_874365.3    | SCRIB        | protein scribble homolog isoform a                                                            | 0.99 | 1.02 | 1.02 | 1.04 | 4.18E-02 | 9.34E-03 | 2.52E-01 | 1.36E-01 |
| NP_057584.2    | PBDC1        | protein PBDC1 isoform 1                                                                       | 0.92 | 1.03 | 0.95 | 0.99 | 4.91E-02 | 1.26E-02 | 8.24E-02 | 1.93E-02 |
| NP_001244942.2 | FDXR         | NADPH:adrenodoxin oxidoreductase, mitochondrial isoform 4                                     | 1.03 | 0.99 | 1.02 | 1.03 | 5.68E-01 | 4.58E-01 | 4.55E-01 | 3.26E-01 |
| NP_005683.2    | LOC114483834 | ABCF2-H2B protein                                                                             | 1.04 | 1.07 | 1.12 | 1.05 | 3.82E-01 | 2.64E-01 | 5.37E-01 | 4.15E-01 |
| XP_011517737.1 | LARP4B       | la-related protein 4B isoform X4                                                              | 0.95 | 0.93 | 0.89 | 0.96 | 6.35E-01 | 5.31E-01 | 8.29E-01 | 7.60E-01 |
| NP_001783.2    | CDH2         | cadherin-2 isoform 1                                                                          | 1.03 | 0.97 | 0.99 | 1.05 | 5.93E-01 | 4.86E-01 | 4.05E-01 | 2.75E-01 |
| NP_057225.2    | DYNC1L1I     | cytoplasmic dynein 1 light intermediate chain 1 isoform 1                                     | 1.00 | 0.97 | 0.97 | 1.02 | 9.61E-01 | 9.45E-01 | 8.32E-01 | 7.64E-01 |
| NP_004541.1    | NDUFS2       | NADH dehydrogenase [ubiquinone] iron-sulfur protein 2, mitochondrial isoform 1 precursor      | 1.00 | 0.96 | 0.96 | 1.04 | 5.37E-01 | 4.23E-01 | 2.90E-01 | 1.68E-01 |
| NP_000145.1    | GALK1        | galactokinase                                                                                 | 1.11 | 0.99 | 1.10 | 1.08 | 2.07E-02 | 2.55E-03 | 5.00E-02 | 4.96E-03 |
| NP_064522.4    | GRIPAP1      | GRIP1-associated protein 1                                                                    | 1.01 | 1.04 | 1.05 | 1.05 | 1.66E-02 | 1.71E-03 | 3.59E-01 | 2.31E-01 |
| NP_060216.2    | TEX10        | testis-expressed protein 10 isoform 1                                                         | 1.13 | 0.99 | 1.12 | 1.08 | 4.23E-01 | 3.04E-01 | 4.04E-01 | 2.74E-01 |
| NP_057306.2    | DDX41        | probable ATP-dependent RNA helicase DDX41 isoform 1                                           | 1.08 | 0.94 | 1.02 | 1.06 | 2.44E-01 | 1.44E-01 | 2.03E-01 | 9.90E-02 |
| NP_006730.2    | MCM5         | DNA replication licensing factor MCM5                                                         | 0.99 | 0.92 | 0.90 | 0.96 | 9.28E-01 | 8.95E-01 | 7.94E-01 | 7.18E-01 |
| NP_057327.2    | CYB5R1       | NADH-cytochrome b5 reductase 1                                                                | 1.00 | 1.09 | 1.09 | 1.00 | 9.80E-01 | 9.71E-01 | 3.24E-01 | 1.99E-01 |
| XP_006718549.1 | EHBPI1L1     | EH domain-binding protein 1-like protein 1 isoform X1                                         | 1.00 | 1.02 | 1.03 | 1.04 | 6.51E-01 | 5.52E-01 | 5.41E-01 | 4.20E-01 |
| NP_004682.2    | ATP6V0D1     | V-type proton ATPase subunit d 1                                                              | 1.08 | 1.00 | 1.08 | 1.05 | 1.22E-01 | 5.44E-02 | 2.27E-01 | 1.15E-01 |
| NP_005849.1    | AKAP8        | A-kinase anchor protein 8                                                                     | 0.91 | 0.94 | 0.85 | 0.97 | 4.38E-02 | 1.02E-02 | 4.02E-01 | 2.73E-01 |
| NP_001678.1    | ATP5F1D      | ATP synthase subunit delta, mitochondrial precursor                                           | 0.88 | 1.00 | 0.87 | 1.02 | 3.68E-02 | 7.33E-03 | 9.37E-02 | 2.62E-02 |
| NP_003070.3    | SMARCE1      | SWI/SNF-related matrix-associated actin-dependent regulator of chromatin subfamily E member 1 | 0.94 | 0.94 | 0.88 | 1.03 | 1.68E-01 | 8.62E-02 | 8.52E-01 | 7.92E-01 |
| XP_005264324.1 | EML4         | echinoderm microtubule-associated protein-like 4 isoform X1                                   | 1.14 | 0.92 | 1.04 | 1.06 | 7.00E-02 | 2.28E-02 | 5.92E-02 | 8.66E-03 |
| NP_057110.3    | RDH11        | retinol dehydrogenase 11 isoform 1 precursor                                                  | 1.09 | 0.99 | 1.08 | 1.11 | 1.22E-01 | 5.39E-02 | 1.27E-01 | 4.51E-02 |
| NP_001273639.1 | ACSL1        | long-chain-fatty-acid-CoA ligase 1 isoform b                                                  | 1.12 | 0.96 | 1.08 | 1.21 | 9.31E-02 | 3.54E-02 | 3.14E-01 | 1.90E-01 |
| XP_011525602.1 | MBOAT7       | lysophospholipid acyltransferase 7 isoform X1                                                 | 1.02 | 1.01 | 1.04 | 0.99 | 5.82E-01 | 4.72E-01 | 8.49E-01 | 7.88E-01 |
| NP_057701.1    | UFM1         | ubiquitin-fold modifier 1 isoform 1 precursor                                                 | 1.01 | 1.02 | 1.03 | 0.96 | 9.29E-01 | 8.97E-01 | 7.28E-01 | 6.33E-01 |
| NP_001921.1    | DHPS         | deoxyhypusine synthase isoform a                                                              | 1.09 | 1.06 | 1.16 | 1.13 | 5.04E-02 | 1.32E-02 | 2.58E-01 | 1.40E-01 |
| NP_060537.3    | MAP7D1       | MAP7 domain-containing protein 1 isoform 1                                                    | 0.95 | 1.04 | 0.98 | 0.99 | 1.22E-01 | 5.41E-02 | 9.41E-02 | 2.64E-02 |
| XP_006720528.1 | SIN3A        | paired amphipathic helix protein Sin3a isoform X1                                             | 1.02 | 0.96 | 0.98 | 1.00 | 1.61E-01 | 8.08E-02 | 2.44E-01 | 1.29E-01 |
| NP_001273554.1 | RNPS1        | RNA-binding protein with serine-rich domain 1 isoform a                                       | 0.92 | 1.02 | 0.94 | 0.93 | 1.58E-02 | 1.51E-03 | 3.45E-02 | 1.07E-03 |
| NP_001185709.1 | ARPC4        | actin-related protein 2/3 complex subunit 4 isoform c                                         | 1.09 | 0.90 | 0.98 | 1.04 | 1.17E-01 | 5.05E-02 | 6.88E-02 | 1.28E-02 |
| NP_004623.1    | DAP3         | 28S ribosomal protein S29, mitochondrial isoform 1                                            | 1.01 | 1.01 | 1.02 | 1.05 | 6.12E-01 | 5.06E-01 | 9.46E-01 | 9.23E-01 |
| NP_059980.2    | TMED9        | transmembrane emp24 domain-containing protein 9 precursor                                     | 1.13 | 1.03 | 1.16 | 1.04 | 5.67E-02 | 1.65E-02 | 1.45E-01 | 5.72E-02 |
| NP_001310826.1 | RMDN3        | regulator of microtubule dynamics protein 3 isoform 3                                         | 1.01 | 0.96 | 0.97 | 1.11 | 7.45E-01 | 6.63E-01 | 4.67E-01 | 3.39E-01 |
| NP_006132.1    | DYNC1L1I2    | cytoplasmic dynein 1 light intermediate chain 2 isoform 1                                     | 1.04 | 0.98 | 1.02 | 1.07 | 2.45E-02 | 3.40E-03 | 3.53E-02 | 1.50E-03 |
| NP_003008.1    | SRSF3        | serine/arginine-rich splicing factor 3                                                        | 0.79 | 1.00 | 0.79 | 0.91 | 1.87E-02 | 2.07E-03 | 4.11E-02 | 2.46E-03 |
| NP_001010.2    | RPS15A       | 40S ribosomal protein S15a                                                                    | 1.14 | 0.99 | 1.14 | 1.05 | 9.79E-02 | 3.83E-02 | 1.11E-01 | 3.51E-02 |
| NP_001273429.1 | NAE1         | NEDD8-activating enzyme E1 regulatory subunit isoform d                                       | 1.10 | 1.02 | 1.12 | 1.08 | 1.96E-02 | 2.27E-03 | 2.53E-01 | 1.37E-01 |
| NP_006362.1    | CRTAP        | cartilage-associated protein precursor                                                        | 1.06 | 0.99 | 1.05 | 1.05 | 2.21E-01 | 1.26E-01 | 5.73E-01 | 4.57E-01 |
| NP_036287.1    | EML2         | echinoderm microtubule-associated protein-like 2 isoform 2                                    | 1.14 | 1.00 | 1.14 | 1.07 | 9.65E-03 | 4.98E-04 | 3.38E-02 | 8.45E-04 |
| NP_112485.1    | FAHD1        | acylpyruvase FAHD1, mitochondrial isoform 2                                                   | 1.19 | 1.00 | 1.19 | 1.06 | 1.68E-02 | 1.74E-03 | 4.79E-02 | 4.27E-03 |
| XP_005247517.1 | MBNL1        | muscleblind-like protein 1 isoform X1                                                         | 1.12 | 0.90 | 1.01 | 1.11 | 8.36E-02 | 3.04E-02 | 8.65E-02 | 2.19E-02 |
| XP_011535987.1 | SPRY4        | protein sprouty homolog 4 isoform X1                                                          | 0.93 | 1.01 | 0.94 | 1.08 | 2.95E-03 | 6.35E-05 | 2.44E-01 | 1.29E-01 |
| NP_071413.1    | GOLPH3       | Golgi phosphoprotein 3                                                                        | 1.05 | 0.93 | 0.97 | 1.03 | 4.58E-01 | 3.39E-01 | 2.78E-01 | 1.58E-01 |
| NP_004121.2    | GYGI         | glycogenin-1 isoform 1                                                                        | 0.99 | 0.99 | 0.98 | 1.01 | 8.82E-01 | 8.35E-01 | 9.62E-01 | 9.44E-01 |

|                |          |                                                                       |      |      |      |      |          |          |          |          |
|----------------|----------|-----------------------------------------------------------------------|------|------|------|------|----------|----------|----------|----------|
| XP_011513776.1 | BLVRA    | biliverdin reductase A isoform X1                                     | 1.06 | 1.01 | 1.06 | 1.00 | 9.79E-02 | 3.83E-02 | 2.16E-01 | 1.08E-01 |
| XP_006715888.1 | ARPC1B   | actin-related protein 2/3 complex subunit 1B isoform X1               | 1.10 | 0.98 | 1.07 | 1.06 | 6.48E-03 | 2.39E-04 | 3.36E-02 | 6.43E-04 |
| NP_006273.1    | STK4     | serine/threonine-protein kinase 4 isoform 1                           | 1.10 | 1.07 | 1.18 | 0.99 | 6.22E-02 | 1.91E-02 | 8.00E-01 | 7.25E-01 |
| NP_001157616.1 | CHAMP1   | chromosome alignment-maintaining phosphoprotein 1                     | 0.84 | 0.96 | 0.81 | 0.88 | 4.69E-01 | 3.51E-01 | 6.19E-01 | 5.06E-01 |
| NP_002728.2    | PRKCA    | protein kinase C alpha type                                           | 1.08 | 0.91 | 0.98 | 1.00 | 1.64E-01 | 8.32E-02 | 8.42E-02 | 2.05E-02 |
| NP_006545.1    | MTX2     | metaxin-2 isoform 1                                                   | 0.99 | 0.99 | 0.98 | 1.03 | 6.81E-01 | 5.86E-01 | 5.63E-01 | 4.43E-01 |
| NP_000867.2    | IGF2R    | cation-independent mannose-6-phosphate receptor precursor             | 0.91 | 1.05 | 0.96 | 1.02 | 1.47E-01 | 7.06E-02 | 1.19E-01 | 4.03E-02 |
| XP_005263495.1 | MTOR     | serine/threonine-protein kinase mTOR isoform X1                       | 1.04 | 0.99 | 1.03 | 1.08 | 1.15E-01 | 4.89E-02 | 3.86E-01 | 2.57E-01 |
| XP_016875929.1 | FNDC3A   | fibronectin type-III domain-containing protein 3A isoform X1          | 1.07 | 0.98 | 1.06 | 1.05 | 2.38E-01 | 1.39E-01 | 3.28E-01 | 2.03E-01 |
| NP_079106.3    | LPCAT1   | lysophosphatidylcholine acyltransferase 1                             | 1.11 | 0.93 | 1.03 | 1.04 | 1.66E-02 | 1.69E-03 | 3.38E-02 | 7.84E-04 |
| XP_016859146.1 | CLASP1   | CLIP-associating protein 1 isoform X1                                 | 1.04 | 0.97 | 1.01 | 1.04 | 1.61E-01 | 8.09E-02 | 1.17E-01 | 3.90E-02 |
| NP_001340975.1 | ARHGEF7  | rho guanine nucleotide exchange factor 7 isoform i                    | 1.13 | 0.93 | 1.05 | 1.19 | 5.36E-02 | 1.51E-02 | 8.22E-02 | 1.92E-02 |
| NP_001305754.1 | HEXA     | beta-hexosaminidase subunit alpha isoform 1 precursor                 | 1.04 | 1.03 | 1.07 | 1.08 | 7.15E-01 | 6.27E-01 | 9.35E-01 | 9.06E-01 |
| NP_005995.2    | UQCRH    | cytochrome b-c1 complex subunit 6, mitochondrial isoform 1 precursor  | 0.73 | 1.07 | 0.78 | 0.92 | 1.34E-02 | 1.03E-03 | 3.53E-02 | 1.56E-03 |
| NP_006546.1    | YKT6     | synaptobrevin homolog YKT6 isoform 1                                  | 1.11 | 1.02 | 1.14 | 1.05 | 8.82E-02 | 3.29E-02 | 1.84E-01 | 8.50E-02 |
| NP_006321.1    | LYPLA1   | acyl-protein thioesterase 1 isoform 1                                 | 1.09 | 1.01 | 1.10 | 1.05 | 6.74E-02 | 2.17E-02 | 9.80E-02 | 2.83E-02 |
| NP_005907.3    | MCM7     | DNA replication licensing factor MCM7 isoform 1                       | 0.93 | 0.91 | 0.85 | 0.98 | 5.17E-02 | 1.41E-02 | 7.99E-01 | 7.24E-01 |
| NP_002848.1    | PEX19    | peroxisomal biogenesis factor 19 isoform a                            | 0.88 | 0.98 | 0.86 | 0.89 | 6.29E-03 | 2.31E-04 | 3.31E-02 | 4.20E-04 |
| NP_004044.3    | BYSL     | bystin                                                                | 0.94 | 1.03 | 0.97 | 1.07 | 1.38E-01 | 6.48E-02 | 1.07E-01 | 3.28E-02 |
| NP_005689.2    | SCAMP3   | secretory carrier-associated membrane protein 3 isoform 1             | 1.10 | 1.03 | 1.13 | 1.06 | 9.33E-02 | 3.56E-02 | 1.76E-01 | 7.98E-02 |
| NP_003655.3    | AP3B1    | AP-3 complex subunit beta-1 isoform 1                                 | 1.02 | 0.98 | 0.99 | 1.02 | 8.10E-02 | 2.89E-02 | 1.50E-01 | 6.02E-02 |
| NP_110517.2    | CTNBL1   | beta-catenin-like protein 1 isoform 1                                 | 0.98 | 0.94 | 0.93 | 1.05 | 8.43E-01 | 7.81E-01 | 6.48E-01 | 5.40E-01 |
| NP_001182068.2 | COG4     | conserved oligomeric Golgi complex subunit 4 isoform 2                | 1.00 | 0.99 | 0.98 | 1.08 | 8.53E-01 | 7.95E-01 | 7.69E-01 | 6.85E-01 |
| NP_005792.1    | EIF1     | eukaryotic translation initiation factor 1                            | 0.84 | 0.94 | 0.79 | 1.07 | 1.03E-02 | 5.71E-04 | 3.32E-01 | 2.06E-01 |
| NP_004539.1    | NDUFB10  | NADH dehydrogenase [ubiquinone] 1 beta subcomplex subunit 10          | 1.00 | 0.97 | 0.97 | 1.09 | 8.75E-01 | 8.25E-01 | 4.52E-01 | 3.23E-01 |
| NP_112483.1    | LAS1L    | ribosomal biogenesis protein LAS1L isoform 1                          | 1.01 | 0.95 | 0.96 | 1.05 | 5.03E-01 | 3.86E-01 | 1.33E-01 | 4.89E-02 |
| XP_005269076.1 | PRKAG1   | 5'-AMP-activated protein kinase subunit gamma-1 isoform X1            | 1.13 | 0.93 | 1.06 | 1.06 | 9.38E-02 | 3.59E-02 | 7.88E-02 | 1.74E-02 |
| NP_079422.1    | NAA50    | N-alpha-acetyltransferase 50 isoform 1                                | 1.16 | 0.89 | 1.04 | 1.09 | 1.42E-01 | 6.73E-02 | 9.94E-02 | 2.90E-02 |
| NP_003680.2    | AKR7A2   | aflatoxin B1 aldehyde reductase member 2 isoform 1                    | 1.10 | 0.94 | 1.04 | 1.02 | 6.70E-02 | 2.15E-02 | 1.15E-01 | 3.79E-02 |
| NP_065801.1    | XPO5     | exportin-5                                                            | 1.07 | 0.95 | 1.02 | 1.01 | 2.76E-01 | 1.71E-01 | 1.76E-01 | 7.93E-02 |
| NP_001007068.1 | SDCBP    | syntenin-1 isoform 1                                                  | 1.05 | 1.03 | 1.08 | 1.04 | 4.83E-01 | 3.66E-01 | 7.93E-01 | 7.16E-01 |
| XP_011526372.1 | POLR2E   | DNA-directed RNA polymerases I, II, and III subunit RPABC1 isoform X1 | 1.04 | 0.97 | 1.01 | 1.08 | 1.30E-01 | 5.91E-02 | 4.36E-01 | 3.08E-01 |
| NP_006411.2    | ARFGEF2  | brefeldin A-inhibited guanine nucleotide-exchange protein 2           | 1.09 | 0.93 | 1.01 | 1.06 | 1.37E-01 | 6.38E-02 | 8.65E-02 | 2.19E-02 |
| NP_055814.1    | RAB21    | ras-related protein Rab-21                                            | 1.18 | 0.97 | 1.14 | 1.10 | 1.28E-02 | 9.39E-04 | 5.18E-02 | 5.74E-03 |
| NP_116294.1    | RBM17    | splicing factor 45                                                    | 1.05 | 0.94 | 0.98 | 1.04 | 1.28E-01 | 5.78E-02 | 1.08E-01 | 3.37E-02 |
| NP_003267.1    | TMPO     | thymopoietin isoform alpha                                            | 1.20 | 0.84 | 0.99 | 1.15 | 3.97E-01 | 2.77E-01 | 2.60E-01 | 1.42E-01 |
| XP_011507656.1 | SRGAP2   | SLIT-ROBO Rho GTPase-activating protein 2 isoform X1                  | 1.12 | 1.01 | 1.13 | 1.07 | 6.17E-02 | 1.88E-02 | 1.62E-01 | 6.93E-02 |
| NP_001275668.1 | DNM1     | dynammin-1 isoform 4                                                  | 1.04 | 1.03 | 1.07 | 1.09 | 4.14E-01 | 2.94E-01 | 8.00E-01 | 7.25E-01 |
| XP_016871905.1 | KIAA1217 | sickle tail protein homolog isoform X4                                | 1.03 | 0.99 | 1.02 | 1.12 | 4.48E-01 | 3.28E-01 | 3.48E-01 | 2.21E-01 |
| NP_077005.2    | WDR18    | WD repeat-containing protein 18 isoform 1                             | 1.10 | 0.98 | 1.08 | 1.05 | 2.14E-01 | 1.20E-01 | 1.79E-01 | 8.17E-02 |
| NP_001061.2    | TUBG1    | tubulin gamma-1 chain                                                 | 0.98 | 0.99 | 0.97 | 1.00 | 5.52E-01 | 4.38E-01 | 8.17E-01 | 7.45E-01 |
| NP_001257904.1 | IST1     | IST1 homolog isoform a                                                | 1.05 | 0.96 | 1.02 | 1.04 | 2.20E-01 | 1.24E-01 | 1.38E-01 | 5.23E-02 |
| NP_001298127.1 | AP2M1    | AP-2 complex subunit mu isoform c                                     | 0.95 | 0.98 | 0.93 | 1.10 | 3.81E-01 | 2.62E-01 | 5.96E-01 | 4.81E-01 |
| NP_002614.2    | PFND4    | prefoldin subunit 4                                                   | 0.86 | 1.06 | 0.92 | 0.94 | 1.98E-01 | 1.08E-01 | 1.48E-01 | 5.90E-02 |
| NP_003477.4    | SLC7A5   | large neutral amino acids transporter small subunit 1                 | 1.11 | 1.04 | 1.16 | 1.11 | 4.06E-01 | 2.85E-01 | 6.06E-01 | 4.92E-01 |
| XP_024307538.1 | DPP9     | dipeptidyl peptidase 9 isoform X3                                     | 1.12 | 1.02 | 1.15 | 1.04 | 3.66E-02 | 7.22E-03 | 8.85E-02 | 2.31E-02 |
| XP_005269516.1 | ATE1     | arginyl-tRNA--protein transferase 1 isoform X3                        | 1.76 | 0.54 | 0.95 | 1.11 | 4.49E-02 | 1.07E-02 | 5.35E-02 | 6.58E-03 |

|                |          |                                                                               |      |      |      |      |          |          |          |          |
|----------------|----------|-------------------------------------------------------------------------------|------|------|------|------|----------|----------|----------|----------|
| NP_003581.1    | CUL3     | cullin-3 isoform 1                                                            | 1.03 | 0.96 | 1.00 | 1.03 | 5.61E-01 | 4.50E-01 | 4.91E-01 | 3.64E-01 |
| NP_055416.2    | EHD2     | EH domain-containing protein 2                                                | 1.40 | 0.78 | 1.08 | 1.08 | 1.37E-01 | 6.38E-02 | 1.55E-01 | 6.38E-02 |
| XP_011529619.1 | SEPTIN6  | septin-6 isoform X1                                                           | 1.12 | 1.02 | 1.14 | 1.06 | 3.02E-01 | 1.92E-01 | 4.07E-01 | 2.78E-01 |
| XP_011530506.1 | SNCA     | alpha-synuclein isoform X1                                                    | 1.02 | 1.00 | 1.02 | 1.13 | 5.22E-02 | 1.43E-02 | 4.04E-01 | 2.74E-01 |
| NP_060422.4    | PTCD3    | pentatricopeptide repeat domain-containing protein 3, mitochondrial precursor | 1.05 | 0.94 | 0.99 | 1.11 | 2.03E-01 | 1.13E-01 | 3.17E-01 | 1.93E-01 |
| NP_001161066.1 | CTSA     | lysosomal protective protein isoform c precursor                              | 0.91 | 0.97 | 0.88 | 1.09 | 1.08E-01 | 4.51E-02 | 3.26E-01 | 2.01E-01 |
| XP_016872279.1 | MRPL43   | 39S ribosomal protein L43, mitochondrial isoform X1                           | 1.02 | 0.97 | 0.99 | 1.07 | 6.44E-01 | 5.45E-01 | 3.71E-01 | 2.42E-01 |
| NP_006581.2    | USP39    | U4/U6.U5 tri-snRNP-associated protein 2 isoform 1                             | 1.08 | 0.96 | 1.04 | 1.05 | 2.17E-01 | 1.22E-01 | 3.11E-01 | 1.87E-01 |
| NP_001344607.1 | LGALS3   | galectin-3 isoform 3                                                          | 1.00 | 1.04 | 1.04 | 1.00 | 8.55E-01 | 7.97E-01 | 2.36E-01 | 1.22E-01 |
| NP_671713.1    | TP53I3   | quinone oxidoreductase PIG3 isoform 1                                         | 1.07 | 1.01 | 1.09 | 1.05 | 7.43E-02 | 2.51E-02 | 1.39E-01 | 5.34E-02 |
| NP_064528.1    | PNO1     | RNA-binding protein PNO1 isoform 1                                            | 0.97 | 0.98 | 0.95 | 1.05 | 1.89E-02 | 2.12E-03 | 6.48E-01 | 5.39E-01 |
| NP_001273015.1 | C11orf98 | uncharacterized protein C11orf98                                              | 0.95 | 1.00 | 0.95 | 1.01 | 1.30E-01 | 5.93E-02 | 2.12E-01 | 1.04E-01 |
| XP_005245421.1 | GATAD2B  | transcriptional repressor p66-beta isoform X1                                 | 0.96 | 0.98 | 0.94 | 0.98 | 6.61E-02 | 2.10E-02 | 5.09E-01 | 3.84E-01 |
| NP_009144.1    | PRAF2    | PRA1 family protein 2                                                         | 1.10 | 0.97 | 1.06 | 1.04 | 1.43E-02 | 1.19E-03 | 3.53E-02 | 1.20E-03 |
| NP_006431.2    | TXNRD2   | thioredoxin reductase 2, mitochondrial isoform 1 precursor                    | 0.89 | 1.16 | 1.03 | 0.99 | 4.59E-02 | 1.11E-02 | 5.62E-02 | 7.27E-03 |
| NP_060206.2    | THUMPD1  | THUMP domain-containing protein 1                                             | 1.04 | 0.99 | 1.03 | 1.03 | 1.88E-01 | 1.00E-01 | 3.23E-01 | 1.98E-01 |
| NP_056997.1    | TXNDC12  | thioredoxin domain-containing protein 12 precursor                            | 0.95 | 0.98 | 0.93 | 0.97 | 3.77E-01 | 2.59E-01 | 6.03E-01 | 4.88E-01 |
| NP_001317656.1 | COPS4    | COP9 signalosome complex subunit 4 isoform 3                                  | 1.03 | 1.00 | 1.03 | 1.01 | 6.92E-01 | 5.99E-01 | 7.01E-01 | 6.01E-01 |
| NP_054766.1    | C19orf53 | leydig cell tumor 10 kDa protein homolog                                      | 0.89 | 1.05 | 0.94 | 0.95 | 1.50E-01 | 7.32E-02 | 1.41E-01 | 5.49E-02 |
| XP_024309124.1 | CTNNB1   | catenin beta-1 isoform X1                                                     | 0.96 | 0.97 | 0.94 | 1.06 | 2.06E-02 | 2.51E-03 | 6.47E-01 | 5.38E-01 |
| NP_954592.1    | CARM1    | histone-arginine methyltransferase CARM1 isoform 1                            | 1.08 | 0.97 | 1.05 | 1.02 | 1.06E-01 | 4.37E-02 | 1.07E-01 | 3.32E-02 |
| NP_005198.1    | CRKL     | crk-like protein                                                              | 0.89 | 1.05 | 0.94 | 0.93 | 1.79E-01 | 9.41E-02 | 1.90E-01 | 8.94E-02 |
| NP_068810.3    | RELA     | transcription factor p65 isoform 1                                            | 1.04 | 0.96 | 1.00 | 1.06 | 4.11E-01 | 2.91E-01 | 2.38E-01 | 1.25E-01 |
| NP_060791.3    | BRX1     | ribosome biogenesis protein BRX1 homolog                                      | 1.16 | 0.88 | 1.01 | 1.05 | 2.11E-01 | 1.18E-01 | 2.30E-01 | 1.17E-01 |
| NP_995319.1    | GMPPA    | mannose-1-phosphate guanyltransferase alpha                                   | 1.03 | 1.00 | 1.02 | 1.04 | 7.55E-01 | 6.75E-01 | 7.46E-01 | 6.58E-01 |
| NP_037470.1    | ALG5     | dolichyl-phosphate beta-glucosyltransferase isoform 1                         | 1.20 | 0.86 | 1.03 | 1.04 | 1.66E-02 | 1.66E-03 | 7.92E-02 | 1.76E-02 |
| NP_066552.2    | NDUFV2   | NADH dehydrogenase [ubiquinone] flavoprotein 2, mitochondrial precursor       | 0.96 | 0.92 | 0.89 | 1.04 | 2.72E-01 | 1.68E-01 | 2.87E-01 | 1.65E-01 |
| NP_001274271.1 | PHPT1    | 14 kDa phosphohistidine phosphatase isoform 4                                 | 0.81 | 1.15 | 0.93 | 0.93 | 8.49E-02 | 3.12E-02 | 7.26E-02 | 1.49E-02 |
| NP_003135.2    | SSR1     | translocon-associated protein subunit alpha isoform 1 precursor               | 1.06 | 0.99 | 1.05 | 1.05 | 2.28E-01 | 1.31E-01 | 2.36E-01 | 1.23E-01 |
| NP_002258.2    | KPNA3    | importin subunit alpha-4                                                      | 1.03 | 0.93 | 0.95 | 1.07 | 5.17E-01 | 4.02E-01 | 2.16E-01 | 1.07E-01 |
| NP_001243284.1 | UBE2L3   | ubiquitin-conjugating enzyme E2 L3 isoform 4                                  | 0.92 | 1.03 | 0.94 | 0.98 | 2.35E-01 | 1.36E-01 | 2.00E-01 | 9.66E-02 |
| NP_055902.1    | SPART    | spartin                                                                       | 1.01 | 1.11 | 1.12 | 1.07 | 9.34E-01 | 9.05E-01 | 3.60E-01 | 2.32E-01 |
| NP_001073331.1 | DBI      | acyl-CoA-binding protein isoform 3                                            | 0.92 | 0.99 | 0.91 | 1.12 | 1.79E-01 | 9.40E-02 | 2.62E-01 | 1.44E-01 |
| NP_003869.1    | GGH      | gamma-glutamyl hydrolase precursor                                            | 0.92 | 1.02 | 0.94 | 1.03 | 1.92E-01 | 1.04E-01 | 2.90E-01 | 1.68E-01 |
| XP_005260640.1 | RAE1     | mRNA export factor isoform X3                                                 | 1.07 | 0.97 | 1.03 | 1.02 | 1.61E-01 | 8.08E-02 | 1.76E-01 | 8.01E-02 |
| NP_001744.2    | CAV1     | caveolin-1 isoform alpha                                                      | 1.15 | 0.99 | 1.14 | 1.09 | 4.78E-02 | 1.19E-02 | 7.88E-02 | 1.73E-02 |
| XP_011518672.1 | SLC25A22 | mitochondrial glutamate carrier 1 isoform X1                                  | 1.17 | 0.99 | 1.16 | 1.11 | 5.12E-03 | 1.54E-04 | 3.31E-02 | 3.15E-04 |
| XP_024307243.1 | GTF2F1   | general transcription factor IIF subunit 1 isoform X1                         | 0.81 | 1.03 | 0.84 | 1.02 | 9.65E-02 | 3.74E-02 | 1.01E-01 | 3.00E-02 |
| NP_071933.2    | ATG3     | ubiquitin-like-conjugating enzyme ATG3 isoform 1                              | 1.07 | 0.97 | 1.04 | 1.09 | 2.36E-01 | 1.37E-01 | 1.71E-01 | 7.52E-02 |
| NP_001269964.1 | RTF2     | replication termination factor 2 isoform a                                    | 0.70 | 1.02 | 0.72 | 1.05 | 5.66E-02 | 1.64E-02 | 9.03E-02 | 2.41E-02 |
| NP_001227.1    | CBR3     | carbonyl reductase [NADPH] 3                                                  | 1.13 | 1.03 | 1.16 | 1.11 | 9.86E-02 | 3.87E-02 | 2.46E-01 | 1.31E-01 |
| NP_001352.2    | DHODH    | dihydroorotate dehydrogenase (quinone), mitochondrial                         | 1.09 | 0.97 | 1.06 | 1.12 | 1.55E-01 | 7.61E-02 | 1.80E-01 | 8.18E-02 |
| NP_001272.2    | TBCB     | tubulin-folding cofactor B isoform 1                                          | 0.94 | 1.04 | 0.97 | 1.03 | 2.54E-01 | 1.52E-01 | 1.69E-01 | 7.34E-02 |
| NP_663780.2    | SYNM     | synemin isoform A                                                             | 1.05 | 0.93 | 0.98 | 1.05 | 4.37E-01 | 3.17E-01 | 3.66E-01 | 2.37E-01 |
| NP_001168.1    | ARL1     | ADP-ribosylation factor-like protein 1 isoform 1                              | 0.99 | 0.91 | 0.90 | 0.93 | 9.04E-01 | 8.62E-01 | 6.30E-01 | 5.19E-01 |
| NP_006351.2    | EIF3M    | eukaryotic translation initiation factor 3 subunit M isoform 1                | 1.16 | 0.95 | 1.10 | 1.06 | 1.38E-01 | 6.43E-02 | 1.13E-01 | 3.61E-02 |
| NP_057678.1    | FKBP11   | peptidyl-prolyl cis-trans isomerase FKBP11 isoform 1 precursor                | 1.09 | 1.02 | 1.11 | 1.03 | 1.17E-01 | 5.06E-02 | 1.89E-01 | 8.89E-02 |



|                |              |                                                                                             |      |      |      |      |          |          |          |          |
|----------------|--------------|---------------------------------------------------------------------------------------------|------|------|------|------|----------|----------|----------|----------|
| XP_005271584.1 | THYN1        | thymocyte nuclear protein 1 isoform X1                                                      | 1.02 | 0.99 | 1.01 | 1.06 | 1.38E-01 | 6.44E-02 | 1.29E-01 | 4.68E-02 |
| NP_006575.2    | CCT6B        | T-complex protein 1 subunit zeta-2 isoform 1                                                | 1.01 | 0.96 | 0.97 | 1.04 | 9.93E-01 | 9.92E-01 | 8.41E-01 | 7.77E-01 |
| XP_011540793.1 | CDK11B       | cyclin-dependent kinase 11B isoform X1                                                      | 1.02 | 0.97 | 0.99 | 1.05 | 4.85E-01 | 3.68E-01 | 5.24E-01 | 4.00E-01 |
| NP_060654.1    | ARL8B        | ADP-ribosylation factor-like protein 8B                                                     | 1.05 | 1.05 | 1.10 | 1.07 | 2.76E-01 | 1.72E-01 | 8.26E-01 | 7.55E-01 |
| NP_003192.1    | TFAM         | transcription factor A, mitochondrial isoform 1 precursor                                   | 0.84 | 1.06 | 0.89 | 0.98 | 3.61E-02 | 7.03E-03 | 4.67E-02 | 4.01E-03 |
| NP_036546.2    | RAB3GAP2     | rab3 GTPase-activating protein non-catalytic subunit                                        | 1.06 | 1.06 | 1.12 | 1.06 | 8.70E-02 | 3.23E-02 | 7.10E-01 | 6.10E-01 |
| NP_004271.1    | EEF1E1       | eukaryotic translation elongation factor 1 epsilon-1 isoform 1                              | 1.05 | 0.99 | 1.05 | 1.04 | 2.95E-02 | 4.81E-03 | 4.55E-02 | 3.76E-03 |
| XP_011509255.1 | HIBCH        | 3-hydroxyisobutyryl-CoA hydrolase, mitochondrial isoform X1                                 | 1.10 | 1.01 | 1.11 | 1.07 | 5.04E-02 | 1.31E-02 | 1.73E-01 | 7.62E-02 |
| XP_016885464.1 | ARHGEF6      | rho guanine nucleotide exchange factor 6 isoform X2                                         | 0.91 | 0.97 | 0.88 | 1.14 | 3.08E-01 | 1.96E-01 | 5.10E-01 | 3.86E-01 |
| NP_009134.1    | PALM2AKAP2   | PALM2-AKAP2 protein isoform 3 (PALM2-AKAP2)                                                 | 0.98 | 1.08 | 1.06 | 1.02 | 8.26E-02 | 2.99E-02 | 1.91E-01 | 9.00E-02 |
| NP_004989.2    | MYO1E        | unconventional myosin-Ie                                                                    | 1.12 | 0.92 | 1.02 | 1.00 | 4.02E-01 | 2.82E-01 | 3.49E-01 | 2.22E-01 |
| NP_055082.1    | C11orf58     | small acidic protein                                                                        | 0.71 | 1.11 | 0.78 | 0.83 | 2.89E-03 | 6.15E-05 | 5.00E-02 | 4.99E-03 |
| NP_001350632.1 | GSTZ1        | maleylacetoacetate isomerase isoform 4                                                      | 1.15 | 0.83 | 0.96 | 1.08 | 8.11E-02 | 2.91E-02 | 5.20E-02 | 5.81E-03 |
| XP_011532521.1 | LRRFIP2      | leucine-rich repeat flightless-interacting protein 2 isoform X1                             | 0.96 | 1.05 | 1.01 | 1.10 | 1.41E-01 | 6.69E-02 | 1.51E-01 | 6.06E-02 |
| NP_036552.1    | IFIT5        | interferon-induced protein with tetratricopeptide repeats 5                                 | 0.99 | 0.97 | 0.97 | 1.07 | 8.64E-01 | 8.08E-01 | 5.90E-01 | 4.74E-01 |
| NP_060668.2    | DNAJC11      | dnaJ homolog subfamily C member 11                                                          | 1.04 | 0.99 | 1.02 | 1.03 | 8.02E-02 | 2.84E-02 | 2.38E-01 | 1.24E-01 |
| NP_001265569.1 | RANBP1       | ran-specific GTPase-activating protein isoform 3                                            | 1.01 | 0.94 | 0.92 | 0.99 | 9.67E-01 | 9.52E-01 | 8.99E-01 | 8.55E-01 |
| NP_001171062.1 | PPP2R2A      | serine/threonine-protein phosphatase 2A 55 kDa regulatory subunit B alpha isoform isoform 2 | 1.05 | 0.97 | 1.02 | 1.06 | 4.78E-02 | 1.18E-02 | 3.50E-01 | 2.23E-01 |
| XP_011526302.1 | SLC27A1      | long-chain fatty acid transport protein 1 isoform X1                                        | 1.06 | 0.92 | 0.97 | 1.04 | 8.80E-02 | 3.28E-02 | 1.79E-01 | 8.17E-02 |
| NP_997227.1    | SPRYD4       | SPRY domain-containing protein 4                                                            | 1.03 | 0.96 | 0.99 | 1.04 | 4.39E-01 | 3.19E-01 | 6.17E-01 | 5.04E-01 |
| NP_001299801.1 | COX20        | cytochrome c oxidase assembly protein COX20, mitochondrial isoform 2                        | 1.08 | 0.97 | 1.04 | 1.01 | 1.86E-01 | 9.88E-02 | 1.45E-01 | 5.68E-02 |
| NP_858058.1    | OGT          | UDP-N-acetylglucosamine-peptide N-acetylglucosaminyltransferase 110 kDa subunit isoform 1   | 1.27 | 0.79 | 1.00 | 1.26 | 4.80E-02 | 1.20E-02 | 1.37E-01 | 5.19E-02 |
| NP_005782.1    | MPHOSPH10    | U3 small nucleolar ribonucleoprotein protein MPP10                                          | 0.94 | 0.99 | 0.93 | 0.96 | 1.36E-02 | 1.06E-03 | 5.20E-01 | 3.96E-01 |
| NP_115963.1    | DPY30        | protein dpy-30 homolog isoform 1                                                            | 0.92 | 0.98 | 0.91 | 1.02 | 7.02E-02 | 2.29E-02 | 5.61E-01 | 4.40E-01 |
| NP_001123996.1 | APIM1        | AP-1 complex subunit mu-1 isoform 1                                                         | 0.98 | 1.01 | 0.98 | 1.01 | 3.27E-02 | 5.82E-03 | 5.68E-01 | 4.52E-01 |
| NP_006003.1    | CLPP         | ATP-dependent Clp protease proteolytic subunit, mitochondrial precursor                     | 1.06 | 0.97 | 1.03 | 1.03 | 1.42E-01 | 6.77E-02 | 1.06E-01 | 3.26E-02 |
| NP_005138.3    | DNAJA3       | dnaJ homolog subfamily A member 3, mitochondrial isoform 1                                  | 1.03 | 1.01 | 1.04 | 1.06 | 2.80E-03 | 5.51E-05 | 1.84E-01 | 8.55E-02 |
| XP_005245324.2 | PLA2G4A      | cytosolic phospholipase A2 isoform X1                                                       | 1.09 | 0.90 | 0.98 | 0.95 | 2.80E-03 | 5.59E-05 | 3.31E-02 | 5.39E-04 |
| NP_004860.2    | VPS4B        | vacuolar protein sorting-associated protein 4B                                              | 0.97 | 1.07 | 1.04 | 1.12 | 5.26E-01 | 4.11E-01 | 3.47E-01 | 2.20E-01 |
| XP_011536034.1 | CDK2         | cyclin-dependent kinase 2 isoform X1                                                        | 1.14 | 1.03 | 1.17 | 1.04 | 4.95E-02 | 1.28E-02 | 8.83E-02 | 2.30E-02 |
| NP_073581.2    | C16orf58     | RUS1 family protein C16orf58                                                                | 1.14 | 0.93 | 1.06 | 1.03 | 1.33E-01 | 6.09E-02 | 9.87E-02 | 2.86E-02 |
| NP_115717.3    | DDI2         | protein DDI1 homolog 2                                                                      | 1.07 | 0.96 | 1.03 | 0.98 | 1.27E-02 | 9.14E-04 | 9.48E-02 | 2.69E-02 |
| NP_075066.1    | MRPL44       | 39S ribosomal protein L44, mitochondrial                                                    | 1.00 | 0.93 | 0.93 | 1.00 | 9.69E-01 | 9.54E-01 | 4.63E-01 | 3.35E-01 |
| NP_112486.1    | QTRT1        | queuine tRNA-ribosyltransferase catalytic subunit 1                                         | 1.07 | 0.94 | 1.01 | 1.04 | 2.50E-01 | 1.49E-01 | 1.49E-01 | 6.00E-02 |
| NP_003696.2    | SLC25A12     | calcium-binding mitochondrial carrier protein Aralar1                                       | 1.16 | 0.81 | 0.94 | 1.03 | 2.25E-03 | 3.35E-05 | 1.80E-02 | 4.80E-05 |
| XP_005269109.1 | RAB5B        | ras-related protein Rab-5B isoform X1                                                       | 1.27 | 1.05 | 1.32 | 1.08 | 4.75E-01 | 3.58E-01 | 5.74E-01 | 4.58E-01 |
| NP_055186.3    | AKAP8L       | A-kinase anchor protein 8-like isoform 1                                                    | 1.07 | 0.89 | 0.95 | 1.05 | 3.56E-01 | 2.39E-01 | 2.51E-01 | 1.35E-01 |
| NP_001304160.1 | MTCH2        | mitochondrial carrier homolog 2 isoform 1x                                                  | 1.03 | 1.00 | 1.02 | 1.00 | 3.05E-01 | 1.94E-01 | 2.93E-01 | 1.72E-01 |
| NP_001020374.1 | U2AF1        | splicing factor U2AF 35 kDa subunit isoform b                                               | 1.00 | 0.97 | 0.97 | 1.09 | 7.68E-01 | 6.89E-01 | 2.93E-01 | 1.72E-01 |
| NP_001355167.1 | LOC102724159 | periodic tryptophan protein 2 homolog                                                       | 1.01 | 1.02 | 1.03 | 1.03 | 5.32E-01 | 4.17E-01 | 7.44E-01 | 6.55E-01 |
| XP_006718732.1 | SPTBN2       | spectrin beta chain, non-erythrocytic 2 isoform X1                                          | 0.87 | 1.07 | 0.92 | 0.85 | 4.22E-01 | 3.03E-01 | 4.42E-01 | 3.13E-01 |
| NP_115729.1    | VPS25        | vacuolar protein-sorting-associated protein 25                                              | 0.98 | 1.05 | 1.03 | 1.06 | 1.17E-01 | 5.02E-02 | 2.68E-01 | 1.49E-01 |
| NP_006223.2    | POLR2H       | DNA-directed RNA polymerases I, II, and III subunit RPABC3 isoform 2                        | 1.16 | 0.86 | 0.99 | 1.07 | 7.77E-02 | 2.69E-02 | 1.05E-01 | 3.21E-02 |
| XP_024306666.1 | STAT5B       | signal transducer and activator of transcription 5B isoform X1                              | 1.03 | 0.95 | 0.98 | 1.10 | 5.53E-01 | 4.40E-01 | 3.14E-01 | 1.90E-01 |
| NP_006288.2    | XRCC1        | DNA repair protein XRCC1                                                                    | 1.00 | 1.00 | 1.00 | 1.04 | 9.57E-01 | 9.39E-01 | 9.95E-01 | 9.93E-01 |
| NP_001112.2    | ADD3         | gamma-adducin isoform b                                                                     | 1.04 | 0.90 | 0.93 | 1.04 | 5.46E-01 | 4.32E-01 | 4.13E-01 | 2.85E-01 |
| XP_006711821.1 | AHCTF1       | protein ELYS isoform X1                                                                     | 0.92 | 1.03 | 0.95 | 0.96 | 4.52E-03 | 1.24E-04 | 1.80E-02 | 6.68E-05 |

|                |            |                                                                                       |      |      |      |      |          |          |          |          |
|----------------|------------|---------------------------------------------------------------------------------------|------|------|------|------|----------|----------|----------|----------|
| XP_016869748.1 | PLIN2      | perilipin-2 isoform X1                                                                | 0.86 | 0.95 | 0.82 | 1.05 | 1.33E-01 | 6.12E-02 | 3.24E-01 | 1.99E-01 |
| NP_004715.1    | ZW10       | centromere/kinetochore protein zw10 homolog                                           | 1.09 | 0.95 | 1.04 | 1.11 | 6.92E-01 | 6.00E-01 | 5.73E-01 | 4.56E-01 |
| NP_061989.2    | UBFD1      | ubiquitin domain-containing protein UBFD1                                             | 0.90 | 1.03 | 0.93 | 0.93 | 9.72E-02 | 3.78E-02 | 9.02E-02 | 2.40E-02 |
| NP_001120664.1 | CNBP       | cellular nucleic acid-binding protein isoform 1                                       | 0.65 | 0.98 | 0.64 | 0.77 | 2.20E-03 | 3.16E-05 | 3.53E-02 | 1.57E-03 |
| NP_002619.1    | PFN2       | profilin-2 isoform b                                                                  | 0.83 | 1.21 | 1.00 | 0.95 | 1.34E-01 | 6.17E-02 | 7.92E-02 | 1.76E-02 |
| NP_005720.1    | PPIF       | peptidyl-prolyl cis-trans isomerase F, mitochondrial precursor                        | 0.96 | 1.03 | 0.99 | 1.03 | 2.22E-01 | 1.27E-01 | 2.52E-01 | 1.36E-01 |
| NP_004587.1    | SNRPA      | U1 small nuclear ribonucleoprotein A                                                  | 1.02 | 0.99 | 1.01 | 0.95 | 4.44E-01 | 3.24E-01 | 3.84E-01 | 2.55E-01 |
| NP_057381.3    | PCYOX1     | prenylcysteine oxidase 1 precursor                                                    | 1.17 | 0.88 | 1.03 | 1.09 | 3.39E-02 | 6.37E-03 | 1.08E-01 | 3.36E-02 |
| NP_110382.3    | TMX1       | thioredoxin-related transmembrane protein 1 precursor                                 | 1.11 | 0.98 | 1.08 | 1.01 | 3.19E-02 | 5.55E-03 | 4.55E-02 | 3.63E-03 |
| NP_803173.1    | STX12      | syntaxin-12                                                                           | 1.00 | 1.02 | 1.02 | 1.06 | 9.56E-02 | 3.69E-02 | 9.24E-01 | 8.92E-01 |
| NP_000989.1    | RPL37A     | 60S ribosomal protein L37a                                                            | 1.15 | 0.85 | 0.98 | 1.02 | 8.80E-02 | 3.28E-02 | 7.81E-02 | 1.68E-02 |
| NP_001070667.1 | SREK1      | splicing regulatory glutamine/lysine-rich protein 1 isoform a                         | 0.95 | 1.04 | 0.98 | 0.96 | 5.21E-01 | 4.06E-01 | 3.70E-01 | 2.42E-01 |
| NP_066553.3    | NDUFV3     | NADH dehydrogenase [ubiquinone] flavoprotein 3, mitochondrial isoform a precursor     | 0.97 | 0.96 | 0.93 | 1.09 | 7.94E-02 | 2.78E-02 | 7.93E-01 | 7.16E-01 |
| NP_000929.1    | POLR2B     | DNA-directed RNA polymerase II subunit RPB2 isoform 1                                 | 0.89 | 1.02 | 0.90 | 0.98 | 1.36E-02 | 1.08E-03 | 3.53E-02 | 1.62E-03 |
| XP_016866767.1 | BAG6       | large proline-rich protein BAG6 isoform X1                                            | 1.12 | 1.02 | 1.15 | 1.31 | 2.89E-01 | 1.82E-01 | 4.76E-01 | 3.49E-01 |
| XP_024309834.1 | FDPS       | farnesyl pyrophosphate synthase isoform X1                                            | 1.07 | 0.97 | 1.04 | 1.09 | 1.42E-01 | 6.75E-02 | 1.39E-01 | 5.34E-02 |
| NP_076997.1    | TMEM109    | transmembrane protein 109 precursor                                                   | 1.13 | 0.96 | 1.08 | 1.01 | 5.17E-02 | 1.41E-02 | 7.39E-02 | 1.53E-02 |
| NP_001171485.1 | PCCB       | propionyl-CoA carboxylase beta chain, mitochondrial isoform 2 precursor               | 1.05 | 1.01 | 1.06 | 1.05 | 3.35E-01 | 2.20E-01 | 4.41E-01 | 3.13E-01 |
| NP_005505.2    | HLA-B      | major histocompatibility complex, class I, B precursor                                | 0.90 | 1.03 | 0.92 | 0.96 | 2.52E-01 | 1.51E-01 | 3.58E-01 | 2.30E-01 |
| NP_055680.3    | NCAPD2     | condensin complex subunit 1                                                           | 0.98 | 0.91 | 0.89 | 1.03 | 8.06E-01 | 7.36E-01 | 5.68E-01 | 4.50E-01 |
| XP_005278336.1 | CNOT3      | CCR4-NOT transcription complex subunit 3 isoform X1                                   | 0.95 | 0.95 | 0.90 | 0.98 | 3.80E-01 | 2.61E-01 | 9.27E-01 | 8.97E-01 |
| NP_004028.4    | AMPD2      | AMP deaminase 2 isoform 1                                                             | 1.13 | 1.01 | 1.14 | 1.06 | 1.14E-01 | 4.86E-02 | 3.65E-01 | 2.36E-01 |
| NP_003085.1    | SNRPE      | small nuclear ribonucleoprotein E isoform 1                                           | 1.20 | 0.80 | 0.96 | 1.03 | 1.17E-01 | 5.02E-02 | 7.88E-02 | 1.74E-02 |
| XP_024306664.1 | STAT3      | signal transducer and activator of transcription 3 isoform X5                         | 1.00 | 1.01 | 1.02 | 1.09 | 1.95E-01 | 1.05E-01 | 9.45E-01 | 9.21E-01 |
| NP_001272998.1 | C11orf54   | ester hydrolase C11orf54 isoform a                                                    | 1.06 | 0.94 | 0.99 | 1.06 | 5.03E-01 | 3.85E-01 | 2.47E-01 | 1.32E-01 |
| NP_003653.1    | PIR        | pirin                                                                                 | 1.10 | 1.06 | 1.17 | 1.31 | 8.61E-03 | 4.07E-04 | 4.37E-02 | 2.96E-03 |
| NP_006285.1    | UQCRB      | cytochrome b-c1 complex subunit 7 isoform 1                                           | 0.99 | 1.00 | 0.99 | 1.09 | 7.12E-01 | 6.23E-01 | 6.59E-01 | 5.53E-01 |
| NP_892017.2    | IRF2BP2    | interferon regulatory factor 2-binding protein 2 isoform A                            | 0.88 | 0.91 | 0.80 | 0.98 | 1.33E-01 | 6.13E-02 | 8.12E-01 | 7.39E-01 |
| NP_009200.2    | STXBP3     | syntaxin-binding protein 3                                                            | 1.03 | 0.98 | 1.00 | 0.99 | 8.66E-01 | 8.11E-01 | 7.53E-01 | 6.67E-01 |
| XP_016874257.1 | OSBPL8     | oxysterol-binding protein-related protein 8 isoform X4                                | 1.09 | 1.08 | 1.18 | 1.02 | 1.79E-01 | 9.39E-02 | 7.31E-01 | 6.37E-01 |
| XP_016868596.1 | LRATD2     | protein LRATD2 isoform X1                                                             | 0.98 | 0.99 | 0.96 | 1.00 | 7.16E-01 | 6.28E-01 | 8.50E-01 | 7.90E-01 |
| XP_016874546.1 | ERC1       | ELKS/Rab6-interacting/CAST family member 1 isoform X2                                 | 0.84 | 1.02 | 0.86 | 0.98 | 1.11E-01 | 4.69E-02 | 1.18E-01 | 3.97E-02 |
| NP_079330.2    | VCIPI1     | deubiquitinating protein VCIPI135                                                     | 1.03 | 1.10 | 1.14 | 1.08 | 3.32E-01 | 2.17E-01 | 3.47E-01 | 2.20E-01 |
| NP_001269079.1 | VPS29      | vacuolar protein sorting-associated protein 29 isoform 3                              | 1.04 | 0.97 | 1.00 | 1.08 | 4.83E-02 | 1.22E-02 | 1.55E-01 | 6.37E-02 |
| NP_443082.2    | GADD45GIP1 | growth arrest and DNA damage-inducible proteins-interacting protein 1                 | 1.01 | 0.96 | 0.96 | 1.03 | 9.50E-01 | 9.29E-01 | 5.43E-01 | 4.22E-01 |
| XP_006720960.1 | NDE1       | nuclear distribution protein nudE homolog 1 isoform X5                                | 0.96 | 1.01 | 0.96 | 1.16 | 3.21E-01 | 2.08E-01 | 4.07E-01 | 2.78E-01 |
| NP_001327.2    | CTSZ       | cathepsin Z                                                                           | 0.92 | 1.03 | 0.95 | 0.96 | 3.25E-02 | 5.73E-03 | 4.79E-02 | 4.32E-03 |
| NP_001403.1    | EIF1AX     | eukaryotic translation initiation factor 1A, X-chromosomal                            | 0.99 | 0.96 | 0.95 | 1.00 | 7.09E-01 | 6.20E-01 | 5.68E-01 | 4.50E-01 |
| XP_005263436.1 | SEC24D     | protein transport protein Sec24D isoform X1                                           | 1.25 | 0.76 | 0.95 | 1.29 | 2.61E-01 | 1.58E-01 | 1.53E-01 | 6.23E-02 |
| XP_006718110.1 | GBF1       | Golgi-specific brefeldin A-resistance guanine nucleotide exchange factor 1 isoform X1 | 0.98 | 1.10 | 1.08 | 1.09 | 7.37E-01 | 6.52E-01 | 2.00E-01 | 9.65E-02 |
| NP_006448.5    | PDLIM5     | PDZ and LIM domain protein 5 isoform a                                                | 1.00 | 1.00 | 1.00 | 1.10 | 9.91E-01 | 9.87E-01 | 9.94E-01 | 9.91E-01 |
| XP_011536932.2 | TRPV4      | transient receptor potential cation channel subfamily V member 4 isoform X1           | 1.02 | 1.01 | 1.03 | 1.05 | 4.19E-01 | 2.99E-01 | 6.88E-01 | 5.86E-01 |
| NP_060830.2    | TXLNG      | gamma-taxilin isoform 1                                                               | 0.97 | 0.97 | 0.94 | 1.07 | 4.97E-01 | 3.79E-01 | 9.50E-01 | 9.28E-01 |
| NP_001317211.1 | MZT2B      | mitotic-spindle organizing protein 2B isoform 1                                       | 1.08 | 0.85 | 0.92 | 1.09 | 9.10E-02 | 3.44E-02 | 4.79E-02 | 4.29E-03 |
| NP_005726.1    | ACTR1B     | beta-centractin                                                                       | 1.02 | 1.00 | 1.03 | 1.08 | 3.89E-02 | 8.14E-03 | 4.11E-01 | 2.83E-01 |
| NP_001013685.1 | PTRHD1     | putative peptidyl-tRNA hydrolase PTRHD1                                               | 0.99 | 1.00 | 0.99 | 1.04 | 4.62E-01 | 3.44E-01 | 7.17E-01 | 6.19E-01 |
| NP_963906.1    | IKBP1      | inhibitor of nuclear factor kappa-B kinase-interacting protein isoform 2              | 1.03 | 0.96 | 0.99 | 1.09 | 8.30E-01 | 7.65E-01 | 5.90E-01 | 4.75E-01 |

|                |          |                                                                      |      |      |      |      |          |          |          |          |
|----------------|----------|----------------------------------------------------------------------|------|------|------|------|----------|----------|----------|----------|
| NP_001073884.1 | U2SURP   | U2 snRNP-associated SURP motif-containing protein isoform 1          | 1.00 | 1.00 | 0.99 | 1.12 | 9.36E-01 | 9.08E-01 | 9.30E-01 | 9.00E-01 |
| XP_016867165.1 | GNPMB    | transmembrane glycoprotein NMB isoform X1                            | 0.84 | 1.17 | 0.98 | 1.21 | 4.34E-02 | 1.00E-02 | 4.79E-02 | 4.27E-03 |
| XP_011511944.1 | LIMCH1   | LIM and calponin homology domains-containing protein 1 isoform X1    | 1.09 | 0.98 | 1.06 | 1.22 | 7.06E-02 | 2.31E-02 | 2.60E-01 | 1.42E-01 |
| NP_001686.1    | ATP6V1C1 | V-type proton ATPase subunit C 1                                     | 1.11 | 1.04 | 1.15 | 1.12 | 1.61E-01 | 8.11E-02 | 2.82E-01 | 1.61E-01 |
| NP_055701.1    | NSA2     | ribosome biogenesis protein NSA2 homolog isoform 1                   | 0.90 | 1.02 | 0.92 | 1.02 | 3.58E-02 | 6.93E-03 | 4.93E-02 | 4.67E-03 |
| NP_690866.1    | TIPRL    | TIP41-like protein isoform 1                                         | 0.96 | 1.02 | 0.98 | 1.11 | 5.92E-01 | 4.83E-01 | 4.76E-01 | 3.49E-01 |
| XP_005266132.1 | DPP7     | dipeptidyl peptidase 2 isoform X1                                    | 1.07 | 0.93 | 1.00 | 1.06 | 4.83E-02 | 1.22E-02 | 6.66E-02 | 1.17E-02 |
| NP_006224.1    | POLR21   | DNA-directed RNA polymerase II subunit RPB9                          | 0.82 | 0.99 | 0.81 | 0.96 | 5.39E-03 | 1.73E-04 | 6.13E-02 | 9.54E-03 |
| NP_001265557.1 | CRNKL1   | crooked neck-like protein 1 isoform d                                | 0.95 | 0.93 | 0.89 | 1.06 | 3.25E-01 | 2.12E-01 | 5.68E-01 | 4.51E-01 |
| NP_001910.2    | EC1I     | enoyl-CoA delta isomerase 1, mitochondrial isoform 1 precursor       | 1.10 | 0.95 | 1.04 | 1.03 | 1.71E-02 | 1.79E-03 | 3.45E-02 | 9.74E-04 |
| NP_006507.2    | SLC2A1   | solute carrier family 2, facilitated glucose transporter member 1    | 1.18 | 1.09 | 1.28 | 1.17 | 5.07E-02 | 1.34E-02 | 1.40E-01 | 5.37E-02 |
| NP_061854.1    | DNAJC10  | dnaJ homolog subfamily C member 10 isoform 1 precursor               | 1.10 | 0.98 | 1.07 | 1.05 | 2.13E-01 | 1.19E-01 | 3.22E-01 | 1.97E-01 |
| NP_057159.2    | VPS36    | vacuolar protein-sorting-associated protein 36 isoform 1             | 1.14 | 0.93 | 1.05 | 1.05 | 1.71E-01 | 8.81E-02 | 1.20E-01 | 4.05E-02 |
| NP_001305771.1 | CNPY3    | protein canopy homolog 3 isoform 3 precursor                         | 0.97 | 1.00 | 0.97 | 1.04 | 2.69E-02 | 4.08E-03 | 1.33E-01 | 4.91E-02 |
| NP_001153173.1 | FHL1     | four and a half LIM domains protein 1 isoform 3 precursor            | 1.78 | 1.33 | 2.40 | 1.30 | 1.44E-01 | 6.86E-02 | 3.73E-01 | 2.46E-01 |
| NP_001002800.1 | SMC4     | structural maintenance of chromosomes protein 4 isoform 1            | 0.93 | 1.01 | 0.94 | 1.01 | 5.70E-01 | 4.59E-01 | 5.60E-01 | 4.38E-01 |
| NP_001825.1    | CLTB     | clathrin light chain B isoform a                                     | 0.80 | 1.06 | 0.84 | 0.96 | 3.94E-03 | 9.31E-05 | 3.95E-02 | 2.27E-03 |
| NP_116315.1    | TCEAL3   | transcription elongation factor A protein-like 3                     | 0.80 | 1.04 | 0.83 | 1.00 | 4.14E-02 | 9.11E-03 | 5.35E-02 | 6.64E-03 |
| NP_003341.1    | UBE2V2   | ubiquitin-conjugating enzyme E2 variant 2                            | 1.02 | 0.99 | 1.01 | 1.09 | 4.32E-02 | 9.92E-03 | 1.23E-01 | 4.24E-02 |
| NP_005882.2    | ACAT2    | acetyl-CoA acetyltransferase, cytosolic isoform 1                    | 1.07 | 1.07 | 1.14 | 1.02 | 6.50E-02 | 2.05E-02 | 9.79E-01 | 9.68E-01 |
| NP_002094.2    | GYS1     | glycogen [starch] synthase, muscle isoform 1                         | 0.97 | 1.03 | 1.00 | 1.03 | 5.12E-03 | 1.55E-04 | 4.04E-01 | 2.74E-01 |
| NP_057017.1    | TMA7     | translation machinery-associated protein 7 isoform 1                 | 0.69 | 1.12 | 0.78 | 0.98 | 1.22E-02 | 8.54E-04 | 3.33E-02 | 6.17E-04 |
| XP_011517549.1 | SEC16A   | protein transport protein Sec16A isoform X1                          | 0.96 | 0.96 | 0.91 | 1.06 | 3.62E-01 | 2.45E-01 | 9.84E-01 | 9.78E-01 |
| NP_001243339.1 | RAB18    | ras-related protein Rab-18 isoform 2                                 | 1.10 | 1.06 | 1.16 | 1.02 | 1.17E-02 | 7.76E-04 | 1.69E-01 | 7.36E-02 |
| NP_055100.2    | EXOSC2   | exosome complex component RRP4 isoform 1                             | 1.12 | 0.93 | 1.04 | 1.07 | 4.91E-01 | 3.73E-01 | 3.20E-01 | 1.95E-01 |
| NP_116185.2    | SYAP1    | synapse-associated protein 1                                         | 0.89 | 1.06 | 0.95 | 0.97 | 2.50E-01 | 1.49E-01 | 1.68E-01 | 7.27E-02 |
| NP_001340027.1 | PRPSAP2  | phosphoribosyl pyrophosphate synthase-associated protein 2 isoform 6 | 1.16 | 0.98 | 1.13 | 1.08 | 2.65E-01 | 1.62E-01 | 2.77E-01 | 1.57E-01 |
| XP_006715770.1 | BZW2     | basic leucine zipper and W2 domain-containing protein 2 isoform X1   | 1.05 | 0.98 | 1.03 | 1.03 | 3.97E-01 | 2.77E-01 | 2.93E-01 | 1.71E-01 |
| NP_000301.1    | PPT1     | palmitoyl-protein thioesterase 1 isoform 1 precursor                 | 0.86 | 0.97 | 0.83 | 0.99 | 2.80E-03 | 5.22E-05 | 1.48E-01 | 5.92E-02 |
| NP_001907.3    | CYC1     | cytochrome c1, heme protein, mitochondrial precursor                 | 1.02 | 0.98 | 1.00 | 0.99 | 5.38E-01 | 4.23E-01 | 3.24E-01 | 1.99E-01 |
| NP_001354490.1 | DOCK7    | dedicator of cytokinesis protein 7 isoform 7                         | 1.11 | 0.90 | 1.00 | 1.09 | 1.86E-01 | 9.92E-02 | 1.02E-01 | 3.03E-02 |
| NP_059122.2    | NUP54    | nucleoporin p54 isoform 1                                            | 1.10 | 0.93 | 1.02 | 1.00 | 1.58E-01 | 7.83E-02 | 1.02E-01 | 3.03E-02 |
| NP_001805.4    | CTSC     | dipeptidyl peptidase 1 isoform a                                     | 0.98 | 0.99 | 0.96 | 1.20 | 3.40E-01 | 2.25E-01 | 7.35E-01 | 6.44E-01 |
| NP_004879.1    | ATP6V1G1 | V-type proton ATPase subunit G 1                                     | 0.97 | 1.07 | 1.04 | 1.22 | 2.79E-01 | 1.74E-01 | 1.27E-01 | 4.52E-02 |
| NP_060377.1    | LAMTOR1  | regulator complex protein LAMTOR1                                    | 0.98 | 1.03 | 1.02 | 1.04 | 5.17E-02 | 1.41E-02 | 3.53E-02 | 1.68E-03 |
| XP_016874289.1 | GTSF1    | gametocyte-specific factor 1 isoform X1                              | 0.81 | 1.05 | 0.86 | 1.01 | 1.66E-01 | 8.44E-02 | 1.49E-01 | 5.96E-02 |
| NP_005461.2    | ABI1     | abl interactor 1 isoform a                                           | 1.06 | 0.98 | 1.04 | 1.08 | 2.41E-02 | 3.28E-03 | 3.76E-02 | 2.07E-03 |
| NP_001035526.1 | YARS2    | tyrosine--tRNA ligase, mitochondrial precursor                       | 1.07 | 1.00 | 1.07 | 1.03 | 1.22E-01 | 5.41E-02 | 2.63E-01 | 1.44E-01 |
| NP_079510.1    | WDR61    | WD repeat-containing protein 61 isoform a                            | 1.03 | 0.93 | 0.95 | 1.07 | 5.14E-01 | 3.98E-01 | 1.72E-01 | 7.60E-02 |
| NP_996896.1    | ELOB     | elongin-B isoform b                                                  | 1.05 | 0.94 | 0.98 | 1.07 | 6.35E-02 | 1.98E-02 | 4.55E-02 | 3.71E-03 |
| YP_003024029.1 | COX2     | cytochrome c oxidase subunit II (mitochondrion)                      | 1.06 | 0.96 | 1.02 | 1.01 | 4.59E-02 | 1.11E-02 | 8.32E-02 | 1.98E-02 |
| NP_071334.1    | EGLN1    | egl nine homolog 1                                                   | 0.92 | 1.00 | 0.92 | 1.03 | 7.57E-03 | 3.21E-04 | 4.87E-02 | 4.52E-03 |
| XP_005264696.2 | HNRNPLL  | heterogeneous nuclear ribonucleoprotein L-like isoform X1            | 1.15 | 0.99 | 1.14 | 1.10 | 5.14E-01 | 3.99E-01 | 5.00E-01 | 3.74E-01 |
| NP_056525.2    | NOP53    | ribosome biogenesis protein NOP53                                    | 0.77 | 1.05 | 0.81 | 1.00 | 5.32E-02 | 1.47E-02 | 6.35E-02 | 1.04E-02 |
| NP_004690.1    | FAM50A   | protein FAM50A                                                       | 0.99 | 1.02 | 1.01 | 1.05 | 7.89E-01 | 7.16E-01 | 5.74E-01 | 4.57E-01 |
| NP_066272.1    | PDLIM1   | PDZ and LIM domain protein 1                                         | 1.08 | 0.97 | 1.04 | 1.17 | 4.37E-01 | 3.17E-01 | 3.23E-01 | 1.98E-01 |
| NP_057479.2    | HACD3    | very-long-chain (3R)-3-hydroxyacyl-CoA dehydratase 3                 | 1.20 | 0.85 | 1.03 | 1.05 | 6.05E-02 | 1.83E-02 | 5.23E-02 | 5.94E-03 |

|                |          |                                                                                |      |      |      |      |          |          |          |          |
|----------------|----------|--------------------------------------------------------------------------------|------|------|------|------|----------|----------|----------|----------|
| NP_852118.2    | GCC2     | GRIP and coiled-coil domain-containing protein 2                               | 0.88 | 0.99 | 0.87 | 1.04 | 4.07E-01 | 2.86E-01 | 4.87E-01 | 3.60E-01 |
| XP_005245506.1 | SHC1     | SHC-transforming protein 1 isoform X1                                          | 1.07 | 0.95 | 1.01 | 1.06 | 1.07E-01 | 4.40E-02 | 1.63E-01 | 7.01E-02 |
| NP_001295126.1 | SSR3     | translocon-associated protein subunit gamma isoform 1                          | 1.11 | 0.98 | 1.09 | 1.05 | 1.57E-01 | 7.77E-02 | 1.56E-01 | 6.50E-02 |
| XP_005261252.2 | PDXK     | pyridoxal kinase isoform X1                                                    | 1.01 | 0.95 | 0.96 | 1.04 | 6.96E-01 | 6.05E-01 | 2.10E-01 | 1.03E-01 |
| NP_001317.1    | CSTF3    | cleavage stimulation factor subunit 3 isoform 1                                | 1.09 | 0.94 | 1.03 | 1.04 | 5.10E-02 | 1.37E-02 | 5.00E-02 | 4.88E-03 |
| NP_078986.1    | ISOC2    | isochorismatase domain-containing protein 2 isoform 2                          | 1.05 | 0.95 | 1.00 | 1.24 | 3.72E-01 | 2.54E-01 | 2.65E-01 | 1.46E-01 |
| NP_001269951.1 | GMPR2    | GMP reductase 2 isoform 4                                                      | 1.05 | 0.99 | 1.04 | 1.04 | 4.49E-01 | 3.29E-01 | 4.02E-01 | 2.72E-01 |
| NP_002786.2    | PSMB3    | proteasome subunit beta type-3                                                 | 1.03 | 0.91 | 0.94 | 0.94 | 5.97E-01 | 4.89E-01 | 2.38E-01 | 1.25E-01 |
| NP_005917.2    | MFAP1    | microfibrillar-associated protein 1                                            | 1.65 | 0.52 | 0.84 | 0.96 | 9.80E-02 | 3.84E-02 | 8.51E-02 | 2.11E-02 |
| NP_036548.1    | RANBP6   | ran-binding protein 6 isoform 1                                                | 0.97 | 0.95 | 0.92 | 1.09 | 3.05E-02 | 5.07E-03 | 1.54E-01 | 6.27E-02 |
| NP_054884.1    | NDUFAF4  | NADH dehydrogenase [ubiquinone] 1 alpha subcomplex assembly factor 4           | 1.07 | 1.01 | 1.08 | 1.07 | 4.60E-02 | 1.12E-02 | 1.20E-01 | 4.08E-02 |
| NP_001017928.1 | CCDC58   | coiled-coil domain-containing protein 58 isoform 1                             | 1.01 | 1.04 | 1.06 | 1.06 | 6.45E-01 | 5.47E-01 | 7.85E-01 | 7.05E-01 |
| NP_060297.1    | SARS2    | serine--tRNA ligase, mitochondrial isoform b precursor                         | 1.04 | 0.98 | 1.02 | 1.02 | 6.36E-01 | 5.34E-01 | 7.25E-01 | 6.29E-01 |
| NP_001093326.2 | IKBKG    | NF-kappa-B essential modulator isoform b                                       | 0.93 | 0.99 | 0.91 | 1.05 | 2.74E-01 | 1.71E-01 | 5.43E-01 | 4.21E-01 |
| NP_001022.1    | RPS28    | 40S ribosomal protein S28                                                      | 0.95 | 1.00 | 0.95 | 1.06 | 3.13E-01 | 2.02E-01 | 3.29E-01 | 2.04E-01 |
| NP_004572.3    | RABGGTA  | geranylgeranyl transferase type-2 subunit alpha                                | 1.05 | 0.94 | 0.98 | 1.14 | 6.56E-01 | 5.58E-01 | 3.69E-01 | 2.40E-01 |
| NP_005871.1    | DNAJA2   | dnaJ homolog subfamily A member 2                                              | 1.02 | 1.00 | 1.02 | 1.08 | 3.43E-01 | 2.27E-01 | 5.28E-01 | 4.05E-01 |
| NP_001092281.1 | SEPTIN8  | septin-8 isoform a                                                             | 1.16 | 1.03 | 1.21 | 1.04 | 4.91E-01 | 3.73E-01 | 6.94E-01 | 5.92E-01 |
| NP_620150.1    | ARL8A    | ADP-ribosylation factor-like protein 8A isoform 1                              | 1.08 | 1.01 | 1.08 | 1.05 | 2.49E-01 | 1.48E-01 | 4.20E-01 | 2.92E-01 |
| NP_001191455.1 | SSR4     | translocon-associated protein subunit delta isoform 1 precursor                | 1.07 | 0.97 | 1.04 | 1.02 | 3.79E-02 | 7.73E-03 | 4.67E-02 | 4.00E-03 |
| NP_001269625.1 | FAM107B  | protein FAM107B isoform a                                                      | 0.79 | 0.99 | 0.78 | 0.78 | 3.02E-01 | 1.93E-01 | 3.70E-01 | 2.42E-01 |
| NP_061832.2    | DAZAP1   | DAZ-associated protein 1 isoform b                                             | 0.94 | 0.93 | 0.87 | 0.96 | 5.09E-02 | 1.36E-02 | 7.90E-01 | 7.12E-01 |
| NP_055567.2    | SPCS2    | signal peptidase complex subunit 2                                             | 1.05 | 0.97 | 1.02 | 1.06 | 3.34E-01 | 2.19E-01 | 2.24E-01 | 1.13E-01 |
| NP_057111.1    | LACTB2   | endoribonuclease LACTB2                                                        | 1.01 | 1.04 | 1.05 | 1.04 | 9.32E-01 | 9.02E-01 | 8.28E-01 | 7.58E-01 |
| NP_777568.1    | CCDC50   | coiled-coil domain-containing protein 50 short isoform                         | 0.77 | 1.01 | 0.78 | 0.95 | 1.23E-01 | 5.51E-02 | 1.93E-01 | 9.17E-02 |
| NP_002361.1    | MAGOH    | protein mago nashi homolog                                                     | 0.97 | 1.03 | 1.00 | 0.94 | 5.10E-01 | 3.93E-01 | 4.47E-01 | 3.18E-01 |
| NP_005442.2    | PDLIM7   | PDZ and LIM domain protein 7 isoform 1                                         | 1.08 | 1.01 | 1.09 | 1.03 | 9.91E-02 | 3.92E-02 | 2.09E-01 | 1.02E-01 |
| NP_001139686.1 | TBC1D15  | TBC1 domain family member 15 isoform 2                                         | 1.04 | 0.98 | 1.02 | 1.01 | 4.49E-01 | 3.30E-01 | 3.26E-01 | 2.01E-01 |
| NP_005906.2    | MCM6     | DNA replication licensing factor MCM6                                          | 0.86 | 0.92 | 0.80 | 1.01 | 1.54E-01 | 7.53E-02 | 4.05E-01 | 2.75E-01 |
| NP_001687.1    | ATP6V1E1 | V-type proton ATPase subunit E 1 isoform a                                     | 1.05 | 1.03 | 1.08 | 1.11 | 9.68E-02 | 3.76E-02 | 4.76E-01 | 3.49E-01 |
| NP_062535.2    | YLPM1    | YLP motif-containing protein 1                                                 | 0.97 | 1.08 | 1.05 | 1.07 | 5.97E-01 | 4.91E-01 | 2.42E-01 | 1.28E-01 |
| NP_002516.2    | NRDC     | nardilysin isoform a                                                           | 0.88 | 1.04 | 0.91 | 1.00 | 3.70E-02 | 7.45E-03 | 1.38E-01 | 5.24E-02 |
| NP_003091.2    | SNX2     | sorting nexin-2 isoform 1                                                      | 1.07 | 1.03 | 1.10 | 1.08 | 9.72E-02 | 3.78E-02 | 2.19E-01 | 1.09E-01 |
| XP_005256774.1 | NCBP3    | nuclear cap-binding protein subunit 3 isoform X1                               | 0.91 | 1.04 | 0.94 | 1.07 | 3.39E-02 | 6.26E-03 | 1.76E-01 | 7.92E-02 |
| NP_006215.1    | PITPNA   | phosphatidylinositol transfer protein alpha isoform                            | 0.95 | 1.07 | 1.01 | 1.05 | 6.11E-01 | 5.05E-01 | 5.27E-01 | 4.05E-01 |
| NP_001104792.1 | DDX54    | ATP-dependent RNA helicase DDX54 isoform 1                                     | 0.98 | 1.05 | 1.03 | 0.95 | 8.61E-01 | 8.05E-01 | 5.88E-01 | 4.72E-01 |
| NP_057591.2    | CDK12    | cyclin-dependent kinase 12 isoform 1                                           | 1.03 | 0.98 | 1.01 | 1.02 | 6.42E-01 | 5.42E-01 | 4.82E-01 | 3.55E-01 |
| NP_002487.1    | NDUFS8   | NADH dehydrogenase [ubiquinone] iron-sulfur protein 8, mitochondrial precursor | 1.09 | 0.94 | 1.02 | 1.07 | 3.91E-02 | 8.33E-03 | 4.55E-02 | 3.72E-03 |
| NP_001354491.1 | POR      | NADPH--cytochrome P450 reductase                                               | 1.09 | 1.07 | 1.15 | 0.99 | 5.34E-01 | 4.19E-01 | 9.16E-01 | 8.77E-01 |
| NP_036602.1    | TNPO3    | transportin-3 isoform 1                                                        | 1.16 | 0.90 | 1.04 | 1.07 | 1.03E-01 | 4.19E-02 | 1.69E-01 | 7.36E-02 |
| NP_789845.1    | PPA2     | inorganic pyrophosphatase 2, mitochondrial isoform 1 precursor                 | 1.17 | 0.86 | 1.00 | 1.05 | 3.51E-01 | 2.34E-01 | 2.68E-01 | 1.50E-01 |
| XP_024305248.1 | CRIP2    | cysteine-rich protein 2 isoform X1                                             | 0.87 | 0.98 | 0.86 | 0.96 | 8.45E-02 | 3.10E-02 | 1.22E-01 | 4.21E-02 |
| NP_060517.1    | RBM22    | pre-mRNA-splicing factor RBM22                                                 | 1.20 | 0.83 | 0.99 | 1.06 | 2.74E-01 | 1.70E-01 | 1.58E-01 | 6.60E-02 |
| XP_006722179.1 | COASY    | bifunctional coenzyme A synthase isoform X2                                    | 0.99 | 1.02 | 1.01 | 1.01 | 8.50E-01 | 7.90E-01 | 6.80E-01 | 5.77E-01 |
| NP_057483.1    | TRIAP1   | TP53-regulated inhibitor of apoptosis 1                                        | 0.97 | 0.93 | 0.90 | 1.07 | 5.53E-01 | 4.40E-01 | 7.67E-01 | 6.83E-01 |
| NP_149061.1    | HDHD5    | haloacid dehalogenase-like hydrolase domain-containing 5 isoform 2 precursor   | 1.02 | 0.94 | 0.96 | 1.15 | 3.43E-01 | 2.27E-01 | 5.03E-01 | 3.78E-01 |
| NP_057107.4    | OTUD6B   | deubiquitinase OTUD6B isoform 1                                                | 1.00 | 1.02 | 1.01 | 1.03 | 9.41E-01 | 9.15E-01 | 8.16E-01 | 7.44E-01 |

|                |          |                                                                        |      |      |      |      |          |          |          |          |
|----------------|----------|------------------------------------------------------------------------|------|------|------|------|----------|----------|----------|----------|
| XP_024304005.1 | ATP5MD   | ATP synthase membrane subunit DAPIT, mitochondrial isoform X1          | 0.89 | 1.06 | 0.95 | 0.93 | 8.91E-02 | 3.35E-02 | 9.00E-02 | 2.38E-02 |
| NP_060309.2    | LPCAT2   | lysophosphatidylcholine acyltransferase 2                              | 1.10 | 0.99 | 1.09 | 1.04 | 2.70E-01 | 1.66E-01 | 2.84E-01 | 1.62E-01 |
| NP_955368.1    | FAHD2B   | fumarylacetoacetate hydrolase domain-containing protein 2B isoform a   | 1.02 | 1.04 | 1.07 | 1.04 | 5.85E-01 | 4.76E-01 | 6.91E-01 | 5.89E-01 |
| NP_060014.3    | NKRF     | NF-kappa-B-repressing factor                                           | 1.12 | 0.96 | 1.07 | 1.08 | 9.91E-02 | 3.91E-02 | 8.53E-02 | 2.12E-02 |
| NP_001342336.1 | NUDT4B   | diphosphoinositol polyphosphate phosphohydrolase NUDT4B                | 1.08 | 0.94 | 1.02 | 0.93 | 1.54E-01 | 7.58E-02 | 1.11E-01 | 3.49E-02 |
| NP_006322.4    | EMG1     | ribosomal RNA small subunit methyltransferase NEP1 isoform 1           | 0.98 | 0.92 | 0.91 | 1.02 | 5.57E-01 | 4.46E-01 | 2.79E-01 | 1.58E-01 |
| NP_001346123.1 | HLA-DRB1 | major histocompatibility complex, class II, DR beta 1 precursor        | 0.94 | 0.98 | 0.92 | 1.04 | 2.18E-01 | 1.23E-01 | 3.35E-01 | 2.09E-01 |
| NP_543010.3    | DTD1     | D-aminoacyl-tRNA deacylase 1 isoform 2                                 | 1.05 | 0.99 | 1.04 | 1.08 | 3.11E-01 | 1.99E-01 | 3.57E-01 | 2.29E-01 |
| NP_001317531.1 | MRPL37   | 39S ribosomal protein L37, mitochondrial isoform 1                     | 0.95 | 0.99 | 0.94 | 1.00 | 5.15E-02 | 1.40E-02 | 3.13E-01 | 1.89E-01 |
| NP_036392.2    | HACL1    | 2-hydroxyacyl-CoA lyase 1 isoform a                                    | 1.17 | 1.02 | 1.20 | 1.02 | 2.55E-02 | 3.64E-03 | 8.83E-02 | 2.30E-02 |
| NP_775873.2    | DIP2B    | disco-interacting protein 2 homolog B                                  | 1.08 | 0.96 | 1.04 | 1.04 | 3.89E-02 | 8.22E-03 | 1.70E-01 | 7.47E-02 |
| NP_001929.1    | DR1      | protein Dr1                                                            | 0.91 | 0.99 | 0.89 | 0.98 | 7.56E-02 | 2.60E-02 | 1.20E-01 | 4.05E-02 |
| XP_024304405.1 | DPF2     | zinc finger protein ubi-d4 isoform X1                                  | 0.97 | 0.94 | 0.91 | 1.15 | 6.38E-01 | 5.37E-01 | 7.53E-01 | 6.67E-01 |
| XP_011527207.1 | ACSS2    | acetyl-coenzyme A synthetase, cytoplasmic isoform X1                   | 0.99 | 1.01 | 1.00 | 1.20 | 6.36E-01 | 5.33E-01 | 4.32E-01 | 3.04E-01 |
| XP_011535262.1 | ACTR10   | actin-related protein 10 isoform X1                                    | 0.98 | 1.35 | 1.25 | 0.98 | 9.09E-01 | 8.70E-01 | 6.47E-01 | 5.39E-01 |
| NP_115866.1    | MRPL41   | 39S ribosomal protein L41, mitochondrial                               | 0.92 | 0.96 | 0.88 | 1.01 | 2.45E-01 | 1.45E-01 | 7.33E-01 | 6.42E-01 |
| NP_036453.1    | LSM4     | U6 snRNA-associated Sm-like protein LSM4 isoform 1                     | 1.03 | 1.10 | 1.13 | 0.99 | 8.89E-01 | 8.45E-01 | 7.17E-01 | 6.19E-01 |
| NP_150597.1    | MRPS36   | 28S ribosomal protein S36, mitochondrial                               | 1.04 | 0.99 | 1.03 | 1.14 | 1.18E-01 | 5.13E-02 | 1.06E-01 | 3.23E-02 |
| NP_001308287.1 | NRBP1    | nuclear receptor-binding protein isoform 2                             | 1.30 | 0.82 | 1.05 | 1.05 | 4.45E-01 | 3.26E-01 | 2.75E-01 | 1.55E-01 |
| NP_060481.3    | ARGLU1   | arginine and glutamate-rich protein 1                                  | 0.96 | 1.01 | 0.97 | 1.07 | 1.94E-01 | 1.05E-01 | 1.67E-01 | 7.21E-02 |
| NP_001353173.1 | GOLGA2   | golgin subfamily A member 2 isoform 1                                  | 0.94 | 1.02 | 0.96 | 1.02 | 4.11E-01 | 2.90E-01 | 3.38E-01 | 2.12E-01 |
| NP_001165462.1 | HCCS     | cytochrome c-type heme lyase                                           | 0.94 | 0.92 | 0.87 | 0.98 | 2.24E-02 | 2.86E-03 | 7.35E-01 | 6.44E-01 |
| NP_064709.2    | CIAPIN1  | anamorsin isoform 1                                                    | 0.92 | 0.99 | 0.92 | 1.03 | 1.97E-02 | 2.30E-03 | 4.43E-02 | 3.21E-03 |
| NP_004556.1    | PEX14    | peroxisomal membrane protein PEX14                                     | 0.96 | 1.14 | 1.09 | 0.99 | 1.19E-01 | 5.19E-02 | 6.65E-02 | 1.15E-02 |
| NP_001276990.1 | SEMA3B   | semaphorin-3B isoform 3 precursor                                      | 0.98 | 1.07 | 1.05 | 1.10 | 1.95E-01 | 1.06E-01 | 5.97E-02 | 8.94E-03 |
| NP_009027.1    | CLTA     | clathrin light chain A isoform b                                       | 0.77 | 1.08 | 0.83 | 0.87 | 2.02E-02 | 2.43E-03 | 3.62E-02 | 1.83E-03 |
| NP_001359503.1 | ATXN2    | ataxin-2 isoform 4                                                     | 0.98 | 1.02 | 1.00 | 1.02 | 7.66E-01 | 6.86E-01 | 5.71E-01 | 4.55E-01 |
| NP_115879.2    | GON7     | EKC/KEOPS complex subunit GON7                                         | 0.87 | 0.94 | 0.82 | 1.05 | 4.82E-01 | 3.64E-01 | 6.99E-01 | 5.98E-01 |
| XP_024307011.1 | YES1     | tyrosine-protein kinase Yes isoform X1                                 | 1.09 | 0.93 | 1.01 | 1.00 | 1.96E-01 | 1.06E-01 | 2.46E-01 | 1.30E-01 |
| NP_001291416.1 | TIMM9    | mitochondrial import inner membrane translocase subunit Tim9 isoform a | 1.09 | 0.90 | 0.99 | 1.16 | 2.54E-01 | 1.52E-01 | 2.03E-01 | 9.85E-02 |
| NP_055422.1    | UBXN4    | UBX domain-containing protein 4                                        | 1.05 | 0.98 | 1.03 | 1.07 | 2.55E-01 | 1.53E-01 | 2.66E-01 | 1.48E-01 |
| NP_055819.2    | EXOSC7   | exosome complex component RRP42                                        | 1.02 | 0.95 | 0.97 | 1.08 | 6.28E-01 | 5.24E-01 | 2.93E-01 | 1.72E-01 |
| XP_005247023.1 | PPIG     | peptidyl-prolyl cis-trans isomerase G isoform X1                       | 0.89 | 1.03 | 0.91 | 0.99 | 9.58E-02 | 3.71E-02 | 9.92E-02 | 2.88E-02 |
| NP_116258.2    | NUDCD1   | nudC domain-containing protein 1 isoform 1                             | 1.05 | 1.03 | 1.08 | 1.14 | 7.07E-02 | 2.32E-02 | 7.75E-01 | 6.92E-01 |
| NP_001137467.1 | LPXN     | leupaxin isoform 1                                                     | 0.95 | 0.98 | 0.94 | 0.94 | 5.31E-01 | 4.16E-01 | 6.78E-01 | 5.74E-01 |
| XP_016872593.1 | CELF1    | CUGBP Elav-like family member 1 isoform X1                             | 1.12 | 0.83 | 0.94 | 1.02 | 3.83E-02 | 7.87E-03 | 3.53E-02 | 1.25E-03 |
| NP_001354250.1 | TRNT1    | CCA tRNA nucleotidyltransferase 1, mitochondrial isoform 1             | 0.93 | 1.02 | 0.95 | 1.00 | 2.50E-01 | 1.49E-01 | 2.83E-01 | 1.62E-01 |
| NP_001271207.1 | PITPNB   | phosphatidylinositol transfer protein beta isoform isoform 3           | 0.99 | 1.10 | 1.09 | 1.15 | 9.29E-01 | 8.97E-01 | 3.75E-01 | 2.47E-01 |
| NP_005994.2    | UQCRCF1  | cytochrome b-c1 complex subunit Rieske, mitochondrial                  | 1.05 | 0.97 | 1.02 | 1.09 | 1.42E-01 | 6.75E-02 | 1.09E-01 | 3.41E-02 |
| XP_016875801.1 | FARF1    | FERM, ARHGEF and pleckstrin domain-containing protein 1 isoform X2     | 0.95 | 0.92 | 0.87 | 0.96 | 4.87E-01 | 3.69E-01 | 7.27E-01 | 6.31E-01 |
| NP_001129490.1 | EPHX1    | epoxide hydrolase 1                                                    | 1.06 | 1.22 | 1.25 | 0.95 | 7.68E-01 | 6.89E-01 | 8.36E-01 | 7.69E-01 |
| XP_016871432.1 | SEPHS1   | selenide, water dikinase 1 isoform X1                                  | 1.08 | 0.98 | 1.05 | 1.02 | 1.96E-01 | 1.06E-01 | 1.59E-01 | 6.66E-02 |
| NP_002077.1    | GRB2     | growth factor receptor-bound protein 2 isoform 1                       | 0.88 | 1.02 | 0.89 | 0.87 | 7.34E-02 | 2.45E-02 | 8.35E-02 | 1.99E-02 |
| NP_061955.1    | DDX56    | probable ATP-dependent RNA helicase DDX56 isoform 1                    | 1.08 | 0.85 | 0.90 | 1.08 | 5.67E-01 | 4.56E-01 | 4.05E-01 | 2.75E-01 |
| NP_061848.2    | TERF2IP  | telomeric repeat-binding factor 2-interacting protein 1                | 0.90 | 0.97 | 0.87 | 1.00 | 4.14E-02 | 9.13E-03 | 1.96E-01 | 9.41E-02 |
| NP_004629.3    | PRRC2A   | protein PRRC2A                                                         | 0.97 | 1.02 | 0.99 | 1.05 | 1.57E-01 | 7.78E-02 | 4.44E-01 | 3.15E-01 |
| XP_005256556.1 | DRG2     | developmentally-regulated GTP-binding protein 2 isoform X1             | 0.99 | 0.90 | 0.89 | 0.99 | 9.31E-01 | 9.01E-01 | 6.38E-01 | 5.26E-01 |

|                |          |                                                                                                         |      |      |      |      |          |          |          |          |
|----------------|----------|---------------------------------------------------------------------------------------------------------|------|------|------|------|----------|----------|----------|----------|
| NP_056280.2    | GEMIN5   | gem-associated protein 5 isoform 1                                                                      | 1.01 | 0.99 | 1.01 | 1.05 | 8.23E-01 | 7.56E-01 | 7.59E-01 | 6.73E-01 |
| NP_619634.1    | PPP1R14B | protein phosphatase 1 regulatory subunit 14B                                                            | 0.78 | 1.28 | 1.01 | 0.95 | 1.38E-01 | 6.49E-02 | 2.30E-01 | 1.17E-01 |
| NP_004153.2    | RAB5A    | ras-related protein Rab-5A isoform 1                                                                    | 0.90 | 0.97 | 0.87 | 0.86 | 1.63E-02 | 1.59E-03 | 6.33E-01 | 5.22E-01 |
| NP_001191676.1 | RFC1     | replication factor C subunit 1 isoform 2                                                                | 0.94 | 1.01 | 0.94 | 1.04 | 2.60E-02 | 3.82E-03 | 5.51E-02 | 7.00E-03 |
| NP_001349806.1 | SMARCB1  | SWI/SNF-related matrix-associated actin-dependent regulator of chromatin subfamily B member 1 isoform d | 1.01 | 0.92 | 0.93 | 1.01 | 1.95E-01 | 1.05E-01 | 3.31E-02 | 5.96E-04 |
| NP_001356414.1 | LSM12    | protein LSM12 homolog isoform 2                                                                         | 1.11 | 0.95 | 1.06 | 1.06 | 3.18E-01 | 2.06E-01 | 2.72E-01 | 1.53E-01 |
| NP_060707.2    | CCAR1    | cell division cycle and apoptosis regulator protein 1 isoform a                                         | 1.04 | 0.96 | 1.00 | 1.02 | 5.09E-02 | 1.36E-02 | 7.51E-02 | 1.57E-02 |
| NP_076417.2    | AACS     | acetoacetyl-CoA synthetase isoform 1                                                                    | 1.15 | 0.96 | 1.10 | 1.14 | 1.61E-03 | 1.73E-05 | 3.31E-02 | 5.95E-04 |
| NP_079170.2    | NOL10    | nucleolar protein 10 isoform 1                                                                          | 1.09 | 0.97 | 1.05 | 1.05 | 3.54E-01 | 2.38E-01 | 3.48E-01 | 2.21E-01 |
| NP_006701.1    | COPS8    | COP9 signalosome complex subunit 8 isoform 1                                                            | 1.12 | 0.96 | 1.08 | 1.04 | 1.55E-01 | 7.65E-02 | 2.65E-01 | 1.46E-01 |
| NP_001139412.1 | PAFAH1B3 | platelet-activating factor acetylhydrolase 1B subunit gamma                                             | 1.18 | 0.90 | 1.06 | 1.06 | 2.82E-02 | 4.35E-03 | 7.96E-02 | 1.79E-02 |
| NP_061882.2    | TOLLIP   | toll-interacting protein isoform 1                                                                      | 1.07 | 0.98 | 1.05 | 1.13 | 4.68E-01 | 3.50E-01 | 3.82E-01 | 2.53E-01 |
| NP_056456.1    | TES      | testin isoform 1                                                                                        | 1.04 | 1.07 | 1.11 | 1.04 | 5.83E-01 | 4.74E-01 | 5.61E-01 | 4.40E-01 |
| NP_076983.1    | NOC4L    | nucleolar complex protein 4 homolog                                                                     | 1.15 | 0.93 | 1.07 | 1.12 | 1.71E-01 | 8.79E-02 | 1.44E-01 | 5.62E-02 |
| NP_001124295.1 | DNMT1    | DNA (cytosine-5)-methyltransferase 1 isoform a                                                          | 1.04 | 0.95 | 0.98 | 1.09 | 6.66E-01 | 5.69E-01 | 6.71E-01 | 5.66E-01 |
| NP_009096.2    | SF3A2    | splicing factor 3A subunit 2                                                                            | 1.11 | 1.00 | 1.10 | 1.08 | 7.69E-03 | 3.32E-04 | 5.79E-02 | 8.18E-03 |
| XP_016867806.1 | MPP6     | MAGUK p55 subfamily member 6 isoform X1                                                                 | 1.06 | 0.99 | 1.06 | 1.03 | 6.07E-02 | 1.84E-02 | 3.20E-01 | 1.95E-01 |
| XP_016858234.1 | EIF2B3   | translation initiation factor eIF-2B subunit gamma isoform X1                                           | 1.06 | 0.99 | 1.05 | 1.03 | 3.61E-02 | 7.04E-03 | 1.39E-01 | 5.35E-02 |
| NP_005099.2    | XYLB     | xylulose kinase isoform 2                                                                               | 1.03 | 0.95 | 0.97 | 1.06 | 8.32E-01 | 7.68E-01 | 5.24E-01 | 4.01E-01 |
| NP_056009.1    | MYO1D    | unconventional myosin-IId isoform 1                                                                     | 0.88 | 0.96 | 0.84 | 0.95 | 1.92E-02 | 2.19E-03 | 3.71E-01 | 2.42E-01 |
| NP_001032242.1 | FOXK1    | forkhead box protein K1                                                                                 | 1.03 | 0.98 | 1.00 | 0.96 | 3.75E-01 | 2.56E-01 | 5.49E-01 | 4.27E-01 |
| NP_001293120.1 | ARPP19   | cAMP-regulated phosphoprotein 19 isoform 1                                                              | 1.02 | 1.05 | 1.07 | 1.00 | 8.64E-01 | 8.10E-01 | 7.86E-01 | 7.07E-01 |
| NP_002759.2    | CHMP1A   | charged multivesicular body protein 1a isoform 2                                                        | 0.90 | 1.03 | 0.92 | 1.03 | 4.12E-03 | 1.01E-04 | 1.16E-01 | 3.86E-02 |
| NP_055417.1    | PIK3R4   | phosphoinositide 3-kinase regulatory subunit 4                                                          | 1.14 | 1.07 | 1.21 | 1.40 | 1.58E-01 | 7.89E-02 | 5.09E-01 | 3.84E-01 |
| NP_055829.2    | RBM34    | RNA-binding protein 34 isoform 1                                                                        | 0.94 | 1.00 | 0.94 | 1.11 | 1.90E-01 | 1.02E-01 | 2.69E-01 | 1.50E-01 |
| NP_005329.3    | HIP1     | huntingtin-interacting protein 1 isoform 1                                                              | 0.95 | 1.00 | 0.95 | 1.03 | 3.89E-01 | 2.70E-01 | 7.12E-01 | 6.14E-01 |
| NP_060102.1    | CDKN2AIP | CDKN2A-interacting protein isoform 1                                                                    | 0.91 | 0.99 | 0.90 | 1.11 | 5.66E-02 | 1.64E-02 | 5.77E-01 | 4.60E-01 |
| XP_011511205.1 | PLS1     | plastin-1 isoform X1                                                                                    | 1.03 | 1.28 | 1.32 | 1.20 | 7.96E-01 | 7.25E-01 | 2.00E-01 | 9.65E-02 |
| NP_009190.2    | VPS45    | vacuolar protein sorting-associated protein 45 isoform 1                                                | 1.15 | 1.04 | 1.19 | 1.03 | 1.36E-02 | 1.06E-03 | 6.52E-02 | 1.09E-02 |
| NP_002479.1    | NDUFA2   | NADH dehydrogenase [ubiquinone] 1 alpha subcomplex subunit 2 isoform 1                                  | 0.89 | 1.00 | 0.88 | 1.06 | 3.72E-03 | 8.60E-05 | 1.15E-01 | 3.81E-02 |
| NP_002694.3    | PPAT     | amidophosphoribosyltransferase precursor                                                                | 1.10 | 0.93 | 1.03 | 1.06 | 3.27E-02 | 5.85E-03 | 5.62E-02 | 7.27E-03 |
| NP_009165.1    | DCTN3    | dynactin subunit 3 isoform 1                                                                            | 1.07 | 0.90 | 0.96 | 1.11 | 9.56E-02 | 3.69E-02 | 7.92E-02 | 1.77E-02 |
| NP_005056.3    | SEL1L    | protein sel-1 homolog 1 isoform 1 precursor                                                             | 1.03 | 0.96 | 0.98 | 0.95 | 2.71E-01 | 1.67E-01 | 1.36E-01 | 5.06E-02 |
| XP_011519705.1 | VPS39    | vam6/Vps39-like protein isoform X1                                                                      | 0.97 | 0.97 | 0.95 | 0.99 | 6.86E-01 | 5.92E-01 | 9.84E-01 | 9.78E-01 |
| NP_113619.3    | COG3     | conserved oligomeric Golgi complex subunit 3                                                            | 1.14 | 0.92 | 1.05 | 1.13 | 2.86E-01 | 1.79E-01 | 2.21E-01 | 1.11E-01 |
| NP_808881.3    | PDE12    | 2',5'-phosphodiesterase 12 isoform 1 precursor                                                          | 1.10 | 1.00 | 1.11 | 1.09 | 1.49E-01 | 7.24E-02 | 3.07E-01 | 1.83E-01 |
| NP_004805.2    | SNRNP40  | U5 small nuclear ribonucleoprotein 40 kDa protein                                                       | 1.03 | 0.96 | 0.98 | 0.98 | 8.39E-01 | 7.76E-01 | 6.68E-01 | 5.63E-01 |
| XP_011531878.1 | CHMP2B   | charged multivesicular body protein 2b isoform X1                                                       | 0.95 | 0.99 | 0.95 | 1.01 | 2.55E-02 | 3.62E-03 | 6.20E-02 | 9.77E-03 |
| NP_004791.1    | TM9SF2   | transmembrane 9 superfamily member 2 precursor                                                          | 0.99 | 0.88 | 0.87 | 1.04 | 1.72E-01 | 8.92E-02 | 3.53E-02 | 1.72E-03 |
| XP_011526370.1 | PIN1     | peptidyl-prolyl cis-trans isomerase NIMA-interacting 1 isoform X1                                       | 0.95 | 1.02 | 0.97 | 1.12 | 1.40E-01 | 6.62E-02 | 1.18E-01 | 3.94E-02 |
| NP_064555.2    | NCLN     | nicalin isoform 1 precursor                                                                             | 1.07 | 0.97 | 1.03 | 1.00 | 4.21E-01 | 3.01E-01 | 3.26E-01 | 2.01E-01 |
| NP_057284.1    | LSM8     | LSM8 homolog, U6 small nuclear RNA associated                                                           | 0.93 | 0.99 | 0.91 | 0.97 | 1.16E-02 | 7.55E-04 | 3.45E-01 | 2.18E-01 |
| NP_116199.2    | ATAD1    | ATPase family AAA domain-containing protein 1 isoform 1                                                 | 1.03 | 1.04 | 1.07 | 1.01 | 3.18E-01 | 2.06E-01 | 8.69E-01 | 8.16E-01 |
| NP_057041.2    | APIP     | methylthioribulose-1-phosphate dehydratase                                                              | 0.99 | 0.98 | 0.97 | 1.01 | 6.57E-01 | 5.59E-01 | 8.30E-01 | 7.62E-01 |
| NP_056073.1    | FKBP15   | FK506-binding protein 15                                                                                | 0.84 | 1.22 | 1.00 | 0.91 | 5.19E-01 | 4.04E-01 | 3.73E-01 | 2.45E-01 |
| NP_001025226.1 | ARHGAP5  | rho GTPase-activating protein 5 isoform a                                                               | 1.22 | 0.95 | 1.16 | 1.14 | 2.84E-01 | 1.77E-01 | 2.38E-01 | 1.25E-01 |
| NP_001129668.1 | TNPO2    | transportin-2 isoform 1                                                                                 | 1.35 | 0.95 | 1.28 | 1.09 | 2.47E-02 | 3.43E-03 | 6.56E-02 | 1.10E-02 |

|                |              |                                                                              |      |      |      |      |          |          |          |          |
|----------------|--------------|------------------------------------------------------------------------------|------|------|------|------|----------|----------|----------|----------|
| NP_004076.1    | TIMM8A       | mitochondrial import inner membrane translocase subunit Tim8 A isoform 1     | 0.91 | 0.95 | 0.87 | 0.95 | 8.42E-02 | 3.07E-02 | 3.10E-01 | 1.86E-01 |
| XP_005270320.1 | SGPL1        | sphingosine-1-phosphate lyase 1 isoform X1                                   | 1.18 | 0.91 | 1.08 | 1.05 | 9.06E-03 | 4.50E-04 | 3.31E-02 | 3.17E-04 |
| NP_002257.1    | KPNA2        | importin subunit alpha-1                                                     | 0.98 | 0.89 | 0.87 | 1.13 | 6.36E-01 | 5.34E-01 | 2.26E-01 | 1.14E-01 |
| NP_065916.2    | DHX36        | ATP-dependent DNA/RNA helicase DHX36 isoform 1                               | 1.04 | 0.96 | 0.99 | 1.03 | 3.19E-01 | 2.07E-01 | 2.12E-01 | 1.05E-01 |
| NP_001342338.1 | H3-2         | histone cluster 2 H3 pseudogene 2                                            | 1.01 | 0.96 | 0.97 | 0.84 | 5.61E-01 | 4.49E-01 | 1.76E-01 | 7.90E-02 |
| XP_011522859.1 | GPATCH8      | G patch domain-containing protein 8 isoform X1                               | 0.92 | 1.00 | 0.92 | 1.05 | 3.75E-01 | 2.57E-01 | 3.82E-01 | 2.53E-01 |
| NP_872620.1    | GPATCH4      | G patch domain-containing protein 4 isoform 2                                | 1.01 | 0.97 | 0.97 | 1.10 | 8.00E-01 | 7.29E-01 | 2.64E-01 | 1.45E-01 |
| XP_016885151.1 | THOC2        | THO complex subunit 2 isoform X1                                             | 0.99 | 0.99 | 0.98 | 1.05 | 9.45E-01 | 9.22E-01 | 1.00E+00 | 1.00E+00 |
| NP_057143.1    | PPIL1        | peptidyl-prolyl cis-trans isomerase-like 1                                   | 1.01 | 1.07 | 1.08 | 1.02 | 9.75E-01 | 9.63E-01 | 5.91E-01 | 4.76E-01 |
| XP_016871749.1 | ARL3         | ADP-ribosylation factor-like protein 3 isoform X1                            | 1.04 | 1.03 | 1.07 | 1.06 | 2.88E-01 | 1.81E-01 | 6.91E-01 | 5.90E-01 |
| NP_002058.2    | GNA11        | guanine nucleotide-binding protein subunit alpha-11                          | 1.09 | 1.01 | 1.10 | 1.11 | 4.24E-02 | 9.65E-03 | 6.89E-02 | 1.30E-02 |
| NP_001230280.1 | NUB1         | NEDD8 ultimate buster 1 isoform 1                                            | 0.93 | 1.01 | 0.93 | 1.01 | 2.50E-01 | 1.49E-01 | 3.58E-01 | 2.30E-01 |
| NP_079216.4    | DOCK5        | dedicator of cytokinesis protein 5 isoform 1                                 | 1.06 | 0.98 | 1.04 | 1.06 | 1.71E-03 | 2.10E-05 | 2.81E-01 | 1.60E-01 |
| NP_001359000.1 | TRMT112      | multifunctional methyltransferase subunit TRM112-like protein isoform 1      | 0.85 | 0.97 | 0.83 | 1.06 | 9.94E-02 | 3.94E-02 | 1.74E-01 | 7.78E-02 |
| NP_444252.1    | PFN2         | profilin-2 isoform a                                                         | 1.02 | 1.08 | 1.10 | 1.03 | 8.61E-01 | 8.05E-01 | 5.01E-01 | 3.76E-01 |
| NP_001316043.1 | BABAM2       | BRISC and BRCA1-A complex member 2 isoform 5                                 | 1.05 | 1.01 | 1.06 | 1.07 | 8.74E-01 | 8.23E-01 | 9.23E-01 | 8.91E-01 |
| XP_005262461.1 | HTATSF1      | HIV Tat-specific factor 1 isoform X1                                         | 0.93 | 0.95 | 0.88 | 1.05 | 7.01E-01 | 6.11E-01 | 8.98E-01 | 8.53E-01 |
| NP_835227.1    | RETRG3       | reticulophagy regulator 3                                                    | 1.07 | 1.03 | 1.10 | 1.07 | 1.22E-01 | 5.42E-02 | 4.66E-01 | 3.39E-01 |
| NP_056290.3    | FAM98A       | protein FAM98A isoform 1                                                     | 1.10 | 0.95 | 1.04 | 1.06 | 1.66E-01 | 8.42E-02 | 1.60E-01 | 6.82E-02 |
| NP_001338285.1 | MMS19        | MMS19 nucleotide excision repair protein homolog isoform 6                   | 1.19 | 0.95 | 1.13 | 1.13 | 1.22E-01 | 5.40E-02 | 1.41E-01 | 5.45E-02 |
| NP_009031.1    | ATP5ME       | ATP synthase subunit e, mitochondrial                                        | 1.04 | 1.00 | 1.04 | 1.03 | 6.59E-01 | 5.61E-01 | 7.32E-01 | 6.39E-01 |
| XP_016858330.1 | VAMP3        | vesicle-associated membrane protein 3 isoform X1                             | 1.00 | 1.04 | 1.04 | 0.99 | 9.80E-01 | 9.71E-01 | 4.11E-01 | 2.81E-01 |
| XP_016859845.1 | PPIL3        | peptidyl-prolyl cis-trans isomerase-like 3 isoform X2                        | 1.15 | 0.94 | 1.07 | 1.04 | 3.25E-01 | 2.11E-01 | 3.73E-01 | 2.46E-01 |
| NP_038466.2    | UBQLN1       | ubiquilin-1 isoform 1                                                        | 0.85 | 0.72 | 0.62 | 0.93 | 5.95E-02 | 1.79E-02 | 2.72E-01 | 1.53E-01 |
| NP_849193.1    | STT3B        | dolichyl-diphosphooligosaccharide--protein glycosyltransferase subunit STT3B | 1.07 | 0.96 | 1.02 | 1.03 | 5.14E-02 | 1.38E-02 | 5.06E-02 | 5.26E-03 |
| XP_006717520.1 | FRMD4A       | FERM domain-containing protein 4A isoform X1                                 | 0.81 | 1.11 | 0.90 | 1.08 | 1.90E-01 | 1.02E-01 | 1.76E-01 | 7.98E-02 |
| NP_061982.3    | ALG1         | chitobiosyldiphosphodolichol beta-mannosyltransferase isoform 1              | 1.10 | 0.97 | 1.07 | 1.02 | 2.02E-01 | 1.11E-01 | 2.01E-01 | 9.74E-02 |
| NP_001358518.1 | WIZ          | protein Wiz isoform 3                                                        | 0.96 | 1.02 | 0.97 | 1.00 | 6.08E-01 | 5.02E-01 | 5.91E-01 | 4.77E-01 |
| XP_011524530.1 | HDHD2        | haloacid dehalogenase-like hydrolase domain-containing protein 2 isoform X1  | 1.04 | 1.02 | 1.06 | 1.03 | 7.83E-01 | 7.07E-01 | 9.24E-01 | 8.92E-01 |
| NP_006101.1    | CD2BP2       | CD2 antigen cytoplasmic tail-binding protein 2                               | 0.98 | 0.84 | 0.82 | 1.01 | 8.33E-01 | 7.69E-01 | 5.35E-01 | 4.11E-01 |
| NP_001172023.1 | NIT1         | deaminated glutathione amidase isoform 4                                     | 1.19 | 0.99 | 1.19 | 1.09 | 3.87E-02 | 8.06E-03 | 5.97E-02 | 8.89E-03 |
| NP_001356715.1 | KRAS         | GTPase KRas isoform a                                                        | 1.08 | 1.02 | 1.11 | 1.08 | 3.73E-02 | 7.56E-03 | 1.54E-01 | 6.28E-02 |
| XP_024309047.1 | LOC112268437 | uncharacterized protein FLJ45252                                             | 0.99 | 0.91 | 0.90 | 1.03 | 8.77E-01 | 8.28E-01 | 4.27E-01 | 2.99E-01 |
| NP_001166367.1 | CAV1         | caveolin-1 isoform beta                                                      | 1.15 | 0.91 | 1.05 | 1.13 | 3.09E-02 | 5.15E-03 | 1.92E-01 | 9.11E-02 |
| NP_003065.3    | SMARCC1      | SWI/SNF complex subunit SMARCC1                                              | 0.98 | 0.90 | 0.87 | 1.05 | 8.62E-01 | 8.06E-01 | 6.61E-01 | 5.55E-01 |
| XP_005273739.1 | ASH2L        | set1/Ash2 histone methyltransferase complex subunit ASH2 isoform X1          | 1.08 | 0.96 | 1.03 | 1.04 | 3.47E-01 | 2.30E-01 | 2.44E-01 | 1.29E-01 |
| NP_001265586.1 | POLDIP3      | polymerase delta-interacting protein 3 isoform 3                             | 1.12 | 0.87 | 0.98 | 1.00 | 1.32E-01 | 6.03E-02 | 8.57E-02 | 2.14E-02 |
| NP_001351449.1 | SLU7         | pre-mRNA-splicing factor SLU7 isoform b                                      | 1.07 | 1.00 | 1.07 | 1.07 | 8.46E-01 | 7.85E-01 | 8.52E-01 | 7.92E-01 |
| NP_976035.1    | POLR1C       | DNA-directed RNA polymerases I and III subunit RPAC1 isoform 1               | 1.05 | 1.01 | 1.05 | 1.06 | 2.36E-01 | 1.38E-01 | 6.38E-01 | 5.26E-01 |
| NP_079434.3    | RUFY1        | RUN and FYVE domain-containing protein 1 isoform a                           | 1.13 | 0.96 | 1.09 | 1.02 | 7.69E-03 | 3.32E-04 | 6.66E-02 | 1.17E-02 |
| NP_064574.1    | ENY2         | transcription and mRNA export factor ENY2 isoform 1                          | 0.86 | 1.03 | 0.89 | 1.07 | 4.41E-02 | 1.03E-02 | 5.79E-02 | 8.15E-03 |
| NP_001295.2    | CPD          | carboxypeptidase D isoform 1 precursor                                       | 0.84 | 1.00 | 0.84 | 1.09 | 1.01E-02 | 5.39E-04 | 9.68E-02 | 2.77E-02 |
| NP_940916.2    | NHLRC2       | NHL repeat-containing protein 2                                              | 1.10 | 1.00 | 1.10 | 1.01 | 2.21E-01 | 1.25E-01 | 3.65E-01 | 2.37E-01 |
| NP_055054.1    | EIF2B2       | translation initiation factor eIF-2B subunit beta                            | 1.05 | 1.03 | 1.08 | 1.04 | 6.28E-02 | 1.95E-02 | 2.38E-01 | 1.24E-01 |
| NP_001336899.1 | PACSN2       | protein kinase C and casein kinase substrate in neurons protein 2 isoform D  | 0.99 | 0.94 | 0.93 | 1.06 | 8.80E-01 | 8.31E-01 | 2.85E-01 | 1.63E-01 |
| NP_008924.1    | NPM3         | nucleoplasmin-3                                                              | 1.04 | 1.06 | 1.07 | 0.93 | 9.47E-01 | 9.25E-01 | 9.47E-01 | 9.24E-01 |
| NP_061918.3    | WDR44        | WD repeat-containing protein 44 isoform 1                                    | 1.05 | 0.97 | 1.01 | 1.06 | 4.83E-02 | 1.23E-02 | 1.82E-01 | 8.34E-02 |

|                |          |                                                                              |      |      |      |      |          |          |          |          |
|----------------|----------|------------------------------------------------------------------------------|------|------|------|------|----------|----------|----------|----------|
| XP_016856320.1 | USP24    | ubiquitin carboxyl-terminal hydrolase 24 isoform X1                          | 1.13 | 0.98 | 1.11 | 1.09 | 8.46E-02 | 3.10E-02 | 9.09E-02 | 2.47E-02 |
| XP_016874530.1 | MON2     | protein MON2 homolog isoform X1                                              | 0.98 | 1.06 | 1.05 | 1.05 | 5.47E-01 | 4.34E-01 | 1.28E-01 | 4.61E-02 |
| XP_006717380.1 | UAP1L1   | UDP-N-acetylhexosamine pyrophosphorylase-like protein 1 isoform X1           | 1.39 | 0.71 | 0.99 | 1.01 | 1.28E-02 | 9.35E-04 | 3.53E-02 | 1.48E-03 |
| NP_065142.2    | MRPL47   | 39S ribosomal protein L47, mitochondrial isoform a                           | 1.14 | 1.46 | 1.73 | 1.01 | 4.53E-01 | 3.35E-01 | 7.40E-01 | 6.51E-01 |
| NP_001351645.1 | MPRI1    | myosin phosphatase Rho-interacting protein isoform 3                         | 1.03 | 1.04 | 1.07 | 1.04 | 8.88E-01 | 8.44E-01 | 9.53E-01 | 9.31E-01 |
| NP_872578.1    | MRPS9    | 28S ribosomal protein S9, mitochondrial                                      | 1.08 | 1.01 | 1.10 | 1.10 | 5.03E-01 | 3.86E-01 | 5.96E-01 | 4.81E-01 |
| NP_057538.1    | EMC4     | ER membrane protein complex subunit 4 isoform a                              | 1.02 | 0.98 | 1.00 | 1.02 | 1.68E-01 | 8.62E-02 | 4.60E-01 | 3.32E-01 |
| NP_060671.3    | TBC1D13  | TBC1 domain family member 13 isoform a                                       | 0.97 | 1.16 | 1.12 | 0.92 | 5.10E-01 | 3.93E-01 | 6.62E-01 | 5.56E-01 |
| NP_057197.2    | TRPV2    | transient receptor potential cation channel subfamily V member 2             | 1.12 | 1.04 | 1.17 | 1.10 | 2.17E-01 | 1.22E-01 | 3.72E-01 | 2.44E-01 |
| NP_057383.2    | HSPA14   | heat shock 70 kDa protein 14 isoform 1                                       | 1.05 | 0.99 | 1.04 | 1.03 | 1.49E-01 | 7.18E-02 | 2.58E-01 | 1.41E-01 |
| NP_057594.5    | SCLY     | selenocysteine lyase                                                         | 1.02 | 1.02 | 1.04 | 1.05 | 5.58E-01 | 4.47E-01 | 9.20E-01 | 8.85E-01 |
| NP_002727.2    | PRKAR2B  | cAMP-dependent protein kinase type II-beta regulatory subunit                | 1.03 | 1.27 | 1.29 | 1.14 | 9.42E-01 | 9.16E-01 | 4.48E-01 | 3.20E-01 |
| NP_003625.2    | NIPSNAPI | protein NipSnap homolog 1 isoform 1                                          | 0.99 | 0.98 | 0.96 | 1.00 | 5.56E-01 | 4.44E-01 | 8.90E-01 | 8.42E-01 |
| NP_057484.4    | HPK      | huntingtin-interacting protein K isoform 1                                   | 0.91 | 1.04 | 0.95 | 1.03 | 6.58E-02 | 2.08E-02 | 2.06E-01 | 1.01E-01 |
| NP_065908.1    | VPS18    | vacuolar protein sorting-associated protein 18 homolog                       | 1.01 | 1.04 | 1.05 | 1.05 | 6.77E-01 | 5.82E-01 | 4.50E-01 | 3.22E-01 |
| NP_003694.1    | NOP14    | nucleolar protein 14 isoform 1                                               | 0.99 | 1.05 | 1.03 | 1.04 | 2.49E-01 | 1.48E-01 | 1.54E-01 | 6.33E-02 |
| NP_001341605.1 | PRKCD    | protein kinase C delta type isoform a                                        | 1.08 | 0.92 | 1.00 | 1.03 | 5.81E-01 | 4.72E-01 | 3.43E-01 | 2.16E-01 |
| NP_056238.2    | AASDHPPT | L-aminoadipate-semialdehyde dehydrogenase-phosphopantetheinyl transferase    | 1.03 | 0.99 | 1.01 | 1.03 | 1.54E-01 | 7.54E-02 | 1.14E-01 | 3.66E-02 |
| NP_001193570.2 | COA6     | cytochrome c oxidase assembly factor 6 homolog isoform 2                     | 0.99 | 0.99 | 0.98 | 1.02 | 6.92E-01 | 6.00E-01 | 8.49E-01 | 7.88E-01 |
| NP_005497.1    | SCARB2   | lysosome membrane protein 2 isoform 1 precursor                              | 1.02 | 1.06 | 1.08 | 1.13 | 7.63E-01 | 6.83E-01 | 7.07E-01 | 6.06E-01 |
| NP_057053.1    | MRPS17   | 28S ribosomal protein S17, mitochondrial                                     | 1.34 | 0.75 | 0.97 | 1.02 | 3.95E-01 | 2.75E-01 | 2.86E-01 | 1.65E-01 |
| NP_079491.2    | PUS1     | tRNA pseudouridine synthase A isoform 1                                      | 1.05 | 1.00 | 1.05 | 1.07 | 3.44E-01 | 2.28E-01 | 3.81E-01 | 2.52E-01 |
| NP_001306045.1 | DNPEP    | aspartyl aminopeptidase isoform a                                            | 1.04 | 1.02 | 1.06 | 1.06 | 1.36E-02 | 1.08E-03 | 4.87E-02 | 4.55E-03 |
| NP_078932.2    | COLGALT1 | procollagen galactosyltransferase 1 precursor                                | 1.18 | 1.06 | 1.25 | 1.13 | 2.18E-03 | 3.07E-05 | 1.13E-01 | 3.62E-02 |
| XP_005255135.1 | FLYWCH2  | FLYWCH family member 2 isoform X1                                            | 0.95 | 0.96 | 0.91 | 1.14 | 3.14E-01 | 2.03E-01 | 9.58E-01 | 9.40E-01 |
| NP_000296.2    | PON2     | serum paraoxonase/arylesterase 2 isoform 1                                   | 1.04 | 1.04 | 1.09 | 1.10 | 2.59E-01 | 1.56E-01 | 9.46E-01 | 9.23E-01 |
| NP_060228.3    | ALKBH5   | RNA demethylase ALKBH5                                                       | 1.48 | 0.82 | 1.18 | 1.01 | 2.96E-01 | 1.87E-01 | 2.17E-01 | 1.08E-01 |
| NP_005644.2    | TFCP2    | alpha-globin transcription factor CP2 isoform 1                              | 1.09 | 1.01 | 1.09 | 1.18 | 2.73E-01 | 1.69E-01 | 3.85E-01 | 2.56E-01 |
| NP_057131.1    | SF3B6    | splicing factor 3B subunit 6                                                 | 1.01 | 1.00 | 1.01 | 1.00 | 7.76E-01 | 6.98E-01 | 9.09E-01 | 8.67E-01 |
| NP_008986.2    | POLR3A   | DNA-directed RNA polymerase III subunit RPC1                                 | 0.96 | 1.03 | 0.98 | 1.19 | 7.64E-01 | 6.84E-01 | 7.16E-01 | 6.18E-01 |
| NP_060700.2    | NUP133   | nuclear pore complex protein Nup133                                          | 1.16 | 0.82 | 0.94 | 1.10 | 5.67E-02 | 1.65E-02 | 5.69E-02 | 7.64E-03 |
| NP_057093.1    | SH3GLB1  | endophilin-B1 isoform 1                                                      | 1.05 | 0.98 | 1.03 | 1.07 | 3.54E-02 | 6.78E-03 | 3.08E-01 | 1.85E-01 |
| NP_006434.1    | DNPH1    | 2'-deoxynucleoside 5'-phosphate N-hydrolase 1 isoform 1                      | 0.97 | 1.02 | 0.98 | 1.12 | 4.30E-01 | 3.10E-01 | 3.51E-01 | 2.24E-01 |
| NP_001029366.1 | EXOSC9   | exosome complex component RRP45 isoform 1                                    | 1.06 | 1.00 | 1.05 | 1.05 | 4.41E-02 | 1.03E-02 | 2.61E-01 | 1.43E-01 |
| NP_061984.2    | HLA-DRA  | HLA class II histocompatibility antigen, DR alpha chain precursor            | 0.97 | 0.91 | 0.88 | 0.95 | 8.10E-01 | 7.41E-01 | 6.97E-01 | 5.96E-01 |
| NP_001188292.1 | HMGN3    | high mobility group nucleosome-binding domain-containing protein 3 isoform d | 0.78 | 1.05 | 0.82 | 0.92 | 4.51E-02 | 1.08E-02 | 5.79E-02 | 7.89E-03 |
| XP_016864078.1 | NELFA    | negative elongation factor A isoform X1                                      | 1.09 | 0.94 | 1.02 | 1.01 | 4.33E-02 | 9.99E-03 | 7.20E-02 | 1.44E-02 |
| XP_005256652.2 | DHRS7B   | dehydrogenase/reductase SDR family member 7B isoform X1                      | 1.12 | 1.02 | 1.15 | 1.19 | 5.74E-02 | 1.69E-02 | 3.86E-01 | 2.57E-01 |
| NP_003644.2    | COPS3    | COP9 signalosome complex subunit 3 isoform 1                                 | 1.05 | 0.96 | 1.01 | 1.05 | 3.44E-01 | 2.28E-01 | 1.84E-01 | 8.47E-02 |
| NP_892021.1    | ZNF326   | DBIRD complex subunit ZNF326 isoform 1                                       | 0.98 | 0.86 | 0.83 | 0.94 | 5.03E-01 | 3.85E-01 | 1.27E-01 | 4.52E-02 |
| XP_011537286.1 | SCAF11   | protein SCAF11 isoform X4                                                    | 0.85 | 0.98 | 0.83 | 0.97 | 1.04E-01 | 4.24E-02 | 1.74E-01 | 7.79E-02 |
| NP_006809.1    | MLLT11   | protein AF1q                                                                 | 0.92 | 0.90 | 0.82 | 1.32 | 1.87E-01 | 1.00E-01 | 8.91E-01 | 8.43E-01 |
| XP_005246300.1 | LANCL1   | glutathione S-transferase LANCL1 isoform X1                                  | 1.00 | 1.00 | 1.00 | 1.02 | 9.87E-01 | 9.81E-01 | 9.45E-01 | 9.20E-01 |
| NP_002386.1    | ME1      | NADP-dependent malic enzyme                                                  | 1.09 | 1.09 | 1.19 | 1.21 | 7.55E-02 | 2.60E-02 | 9.81E-01 | 9.72E-01 |
| NP_001018494.1 | PUM1     | pumilio homolog 1 isoform 1                                                  | 0.88 | 1.07 | 0.94 | 1.04 | 2.57E-01 | 1.55E-01 | 2.66E-01 | 1.48E-01 |
| NP_478126.1    | EXOSC6   | exosome complex component MTR3                                               | 1.03 | 0.99 | 1.02 | 1.07 | 5.78E-03 | 1.94E-04 | 2.51E-01 | 1.35E-01 |
| NP_068579.3    | EXOC4    | exocyst complex component 4 isoform a                                        | 1.06 | 0.89 | 0.94 | 1.04 | 1.23E-01 | 5.48E-02 | 5.79E-02 | 8.18E-03 |



|                |          |                                                                                         |      |      |      |      |          |          |          |          |
|----------------|----------|-----------------------------------------------------------------------------------------|------|------|------|------|----------|----------|----------|----------|
| NP_001269803.1 | SMARCA1  | probable global transcription activator SNF2L1 isoform d                                | 1.00 | 0.93 | 0.93 | 1.11 | 9.86E-01 | 9.78E-01 | 6.48E-01 | 5.40E-01 |
| NP_001093897.1 | RAP1GDS1 | rap1 GTPase-GDP dissociation stimulator 1 isoform 3                                     | 1.05 | 0.96 | 1.01 | 1.08 | 5.31E-02 | 1.47E-02 | 5.83E-02 | 8.29E-03 |
| NP_064708.1    | COQ9     | ubiquinone biosynthesis protein COQ9, mitochondrial precursor                           | 1.03 | 0.95 | 0.98 | 1.05 | 3.37E-01 | 2.21E-01 | 1.15E-01 | 3.83E-02 |
| NP_065757.1    | SCAF4    | SR-related and CTD-associated factor 4 isoform 1                                        | 1.06 | 0.92 | 0.97 | 1.10 | 6.50E-02 | 2.05E-02 | 4.47E-02 | 3.35E-03 |
| NP_005863.1    | BCAS2    | pre-mRNA-splicing factor SPF27                                                          | 1.15 | 1.15 | 1.34 | 1.14 | 5.44E-01 | 4.30E-01 | 9.98E-01 | 9.97E-01 |
| XP_016880042.1 | ACACA    | acetyl-CoA carboxylase 1 isoform X1                                                     | 1.00 | 1.07 | 1.06 | 1.09 | 9.43E-01 | 9.20E-01 | 2.37E-01 | 1.24E-01 |
| XP_005258335.1 | NPC1     | NPC intracellular cholesterol transporter 1 isoform X2                                  | 1.01 | 1.06 | 1.08 | 1.19 | 8.07E-01 | 7.37E-01 | 6.51E-01 | 5.45E-01 |
| NP_001271330.1 | TAMM41   | phosphatidate cytidylyltransferase, mitochondrial isoform a precursor                   | 1.05 | 0.94 | 0.99 | 1.02 | 5.25E-01 | 4.11E-01 | 2.69E-01 | 1.50E-01 |
| NP_060851.2    | SHFL     | shiftless antiviral inhibitor of ribosomal frameshifting protein isoform 1              | 0.86 | 1.04 | 0.89 | 1.00 | 1.61E-01 | 8.08E-02 | 1.42E-01 | 5.51E-02 |
| XP_005260495.1 | PLCG1    | 1-phosphatidylinositol 4,5-bisphosphate phosphodiesterase gamma-1 isoform X1            | 1.02 | 0.97 | 0.99 | 1.08 | 7.03E-01 | 6.13E-01 | 4.26E-01 | 2.98E-01 |
| NP_060873.4    | DCP1A    | mRNA-decapping enzyme 1A isoform a                                                      | 1.06 | 0.92 | 0.96 | 1.07 | 6.37E-01 | 5.36E-01 | 3.42E-01 | 2.15E-01 |
| NP_005993.1    | UCHL3    | ubiquitin carboxyl-terminal hydrolase isozyme L3 isoform 2                              | 1.10 | 0.98 | 1.08 | 1.03 | 2.36E-01 | 1.37E-01 | 2.15E-01 | 1.06E-01 |
| NP_006149.2    | NEFL     | neurofilament light polypeptide                                                         | 0.97 | 1.00 | 0.97 | 1.06 | 7.84E-01 | 7.08E-01 | 8.40E-01 | 7.75E-01 |
| XP_011507899.1 | RRP15    | RRP15-like protein isoform X1                                                           | 0.80 | 1.05 | 0.84 | 0.97 | 4.14E-03 | 1.07E-04 | 3.69E-02 | 1.97E-03 |
| NP_005427.2    | CCDC6    | coiled-coil domain-containing protein 6                                                 | 0.89 | 1.04 | 0.93 | 0.99 | 3.94E-03 | 9.43E-05 | 3.31E-02 | 4.80E-04 |
| NP_612430.2    | SAAL1    | protein SAAL1                                                                           | 0.86 | 1.02 | 0.88 | 1.00 | 7.09E-02 | 2.33E-02 | 8.02E-02 | 1.84E-02 |
| NP_689759.2    | SRFBP1   | serum response factor-binding protein 1                                                 | 0.99 | 0.91 | 0.90 | 0.99 | 9.30E-01 | 9.00E-01 | 4.79E-01 | 3.53E-01 |
| XP_016867663.1 | INHBA    | inhibin beta A chain isoform X1                                                         | 1.14 | 1.11 | 1.27 | 1.08 | 4.82E-01 | 3.64E-01 | 9.23E-01 | 8.91E-01 |
| XP_016869078.1 | OXR1     | oxidation resistance protein 1 isoform X1                                               | 1.16 | 0.97 | 1.12 | 1.10 | 5.70E-02 | 1.66E-02 | 1.88E-01 | 8.79E-02 |
| XP_005254606.1 | B2M      | beta-2-microglobulin isoform X1                                                         | 1.00 | 0.99 | 0.99 | 1.09 | 9.93E-01 | 9.92E-01 | 7.78E-01 | 6.97E-01 |
| XP_005246794.1 | RBMS1    | RNA-binding motif, single-stranded-interacting protein 1 isoform X1                     | 1.01 | 0.90 | 0.91 | 1.03 | 8.72E-01 | 8.20E-01 | 1.84E-01 | 8.48E-02 |
| NP_003737.1    | DYNLL1   | dynein light chain 1, cytoplasmic                                                       | 1.01 | 1.00 | 1.01 | 0.97 | 5.94E-01 | 4.87E-01 | 6.25E-01 | 5.13E-01 |
| XP_011511221.1 | XRN1     | 5'-3' exoribonuclease 1 isoform X1                                                      | 1.04 | 0.92 | 0.96 | 1.05 | 1.22E-01 | 5.44E-02 | 9.44E-02 | 2.67E-02 |
| NP_073613.2    | OSBPL11  | oxysterol-binding protein-related protein 11                                            | 1.06 | 0.93 | 0.99 | 1.12 | 4.55E-01 | 3.36E-01 | 3.46E-01 | 2.19E-01 |
| XP_005257071.1 | MSI2     | RNA-binding protein Musashi homolog 2 isoform X1                                        | 0.92 | 1.04 | 0.95 | 1.20 | 5.97E-01 | 4.90E-01 | 5.08E-01 | 3.82E-01 |
| NP_065174.1    | CORO1B   | coronin-1B                                                                              | 1.10 | 1.01 | 1.11 | 1.04 | 4.60E-02 | 1.12E-02 | 8.65E-02 | 2.19E-02 |
| NP_898880.1    | VPS28    | vacuolar protein sorting-associated protein 28 homolog isoform 2                        | 1.08 | 1.13 | 1.23 | 1.16 | 4.35E-01 | 3.15E-01 | 6.38E-01 | 5.27E-01 |
| NP_055083.1    | MAPRE2   | microtubule-associated protein RP/EB family member 2 isoform 1                          | 1.04 | 0.99 | 1.03 | 1.06 | 3.19E-02 | 5.51E-03 | 2.49E-01 | 1.33E-01 |
| NP_001356370.1 | NIF3L1   | NIF3-like protein 1 isoform 1                                                           | 0.95 | 1.07 | 1.00 | 0.93 | 7.40E-01 | 6.57E-01 | 5.61E-01 | 4.40E-01 |
| NP_055953.3    | RTF1     | RNA polymerase-associated protein RTF1 homolog                                          | 0.98 | 0.94 | 0.92 | 0.95 | 8.47E-01 | 7.86E-01 | 7.59E-01 | 6.73E-01 |
| NP_003087.1    | SNRPG    | small nuclear ribonucleoprotein G isoform a                                             | 1.05 | 0.95 | 1.00 | 1.07 | 3.39E-02 | 6.27E-03 | 6.85E-02 | 1.25E-02 |
| NP_006311.3    | PGRMC2   | membrane-associated progesterone receptor component 2                                   | 1.06 | 1.03 | 1.09 | 1.07 | 3.38E-02 | 6.19E-03 | 5.80E-01 | 4.64E-01 |
| XP_011536470.1 | ZNF385A  | zinc finger protein 385A isoform X1                                                     | 0.96 | 1.00 | 0.96 | 1.13 | 1.16E-01 | 4.94E-02 | 2.15E-01 | 1.06E-01 |
| NP_054701.1    | LAMP2    | lysosome-associated membrane glycoprotein 2 isoform B precursor                         | 0.94 | 0.96 | 0.91 | 0.98 | 3.66E-01 | 2.48E-01 | 7.32E-01 | 6.40E-01 |
| XP_011517438.1 | ELP1     | elongator complex protein 1 isoform X1                                                  | 1.12 | 0.88 | 0.98 | 1.01 | 2.01E-01 | 1.10E-01 | 1.58E-01 | 6.61E-02 |
| XP_011530170.1 | ARFIP1   | arfaptin-1 isoform X1                                                                   | 1.05 | 1.03 | 1.08 | 1.04 | 5.74E-01 | 4.64E-01 | 8.92E-01 | 8.45E-01 |
| NP_079353.3    | TOE1     | target of EGR1 protein 1                                                                | 0.98 | 1.01 | 0.99 | 1.03 | 7.28E-01 | 6.41E-01 | 6.24E-01 | 5.12E-01 |
| NP_001304712.1 | TSTA3    | GDP-L-fucose synthase isoform 1                                                         | 0.99 | 1.01 | 0.99 | 0.97 | 5.06E-02 | 1.33E-02 | 2.65E-01 | 1.47E-01 |
| NP_056271.3    | NELFB    | negative elongation factor B                                                            | 1.08 | 0.88 | 0.95 | 1.06 | 4.17E-01 | 2.97E-01 | 2.70E-01 | 1.51E-01 |
| NP_001600.1    | ACADSB   | short/branched chain specific acyl-CoA dehydrogenase, mitochondrial isoform 1 precursor | 1.05 | 0.93 | 0.98 | 1.02 | 3.83E-01 | 2.64E-01 | 2.34E-01 | 1.21E-01 |
| NP_004880.1    | ATP5MF   | ATP synthase subunit f, mitochondrial isoform 2a                                        | 1.16 | 0.96 | 1.11 | 1.05 | 2.80E-01 | 1.74E-01 | 2.47E-01 | 1.31E-01 |
| NP_003379.4    | CLIP2    | CAP-Gly domain-containing linker protein 2 isoform 1                                    | 0.96 | 1.03 | 0.99 | 0.94 | 3.37E-01 | 2.21E-01 | 2.03E-01 | 9.86E-02 |
| NP_003086.1    | SNRPF    | small nuclear ribonucleoprotein F                                                       | 0.97 | 0.94 | 0.91 | 1.16 | 5.40E-01 | 4.26E-01 | 5.10E-01 | 3.86E-01 |
| XP_024305402.1 | GNG2     | guanine nucleotide-binding protein G(I)/G(S)/G(O) subunit gamma-2 isoform X2            | 1.02 | 0.97 | 1.00 | 1.09 | 6.90E-01 | 5.97E-01 | 4.52E-01 | 3.23E-01 |
| XP_005246629.1 | MYO1B    | unconventional myosin-1b isoform X1                                                     | 0.94 | 1.04 | 0.98 | 1.11 | 8.52E-02 | 3.13E-02 | 2.63E-01 | 1.45E-01 |
| NP_005096.1    | RBM8A    | RNA-binding protein 8A                                                                  | 0.78 | 1.02 | 0.79 | 0.95 | 2.25E-02 | 2.88E-03 | 8.74E-02 | 2.24E-02 |
| NP_004704.3    | NEMF     | nuclear export mediator factor NEMF isoform 1                                           | 1.00 | 1.03 | 1.03 | 1.01 | 9.06E-01 | 8.65E-01 | 6.66E-01 | 5.61E-01 |

|                |          |                                                                     |      |      |      |      |          |          |          |          |
|----------------|----------|---------------------------------------------------------------------|------|------|------|------|----------|----------|----------|----------|
| NP_002785.1    | PSMB2    | proteasome subunit beta type-2 isoform 1                            | 1.02 | 1.00 | 1.02 | 1.02 | 6.98E-01 | 6.08E-01 | 8.11E-01 | 7.37E-01 |
| XP_005250211.1 | CUX1     | protein CASP isoform X6                                             | 0.86 | 1.02 | 0.88 | 1.05 | 5.54E-01 | 4.41E-01 | 5.13E-01 | 3.90E-01 |
| NP_060686.3    | PANK4    | 4'-phosphopantetheine phosphatase                                   | 1.18 | 1.10 | 1.30 | 1.11 | 1.19E-01 | 5.17E-02 | 4.48E-01 | 3.19E-01 |
| NP_001298240.1 | VKORC1   | vitamin K epoxide reductase complex subunit 1 isoform 3 precursor   | 1.05 | 0.94 | 0.99 | 1.00 | 3.29E-01 | 2.15E-01 | 1.60E-01 | 6.76E-02 |
| NP_073750.2    | MRPS11   | 28S ribosomal protein S11, mitochondrial isoform a                  | 0.97 | 1.03 | 1.01 | 1.01 | 8.80E-01 | 8.31E-01 | 7.86E-01 | 7.06E-01 |
| NP_037450.2    | PRRC2B   | protein PRRC2B                                                      | 0.83 | 1.03 | 0.86 | 1.03 | 1.99E-02 | 2.35E-03 | 8.65E-02 | 2.19E-02 |
| NP_002063.2    | GNAQ     | guanine nucleotide-binding protein G(q) subunit alpha               | 1.06 | 0.99 | 1.05 | 1.04 | 2.17E-01 | 1.23E-01 | 3.24E-01 | 1.99E-01 |
| NP_001316422.1 | EMC2     | ER membrane protein complex subunit 2 isoform 1                     | 1.08 | 0.96 | 1.04 | 1.06 | 2.74E-01 | 1.71E-01 | 3.25E-01 | 2.01E-01 |
| NP_003633.2    | HAT1     | histone acetyltransferase type B catalytic subunit                  | 0.77 | 0.91 | 0.70 | 0.93 | 2.30E-02 | 3.01E-03 | 1.17E-01 | 3.90E-02 |
| NP_056528.2    | RRM2B    | ribonucleoside-diphosphate reductase subunit M2 B isoform 1         | 1.29 | 0.92 | 1.19 | 1.12 | 8.53E-02 | 3.14E-02 | 1.01E-01 | 2.98E-02 |
| NP_002406.1    | MIF      | macrophage migration inhibitory factor                              | 1.03 | 1.02 | 1.05 | 1.01 | 5.87E-01 | 4.78E-01 | 8.15E-01 | 7.43E-01 |
| NP_000104.1    | TOR1A    | torsin-1A precursor                                                 | 1.10 | 0.87 | 0.95 | 1.07 | 2.51E-01 | 1.50E-01 | 1.11E-01 | 3.52E-02 |
| NP_001229536.1 | NCAM1    | neural cell adhesion molecule 1 isoform 5 precursor                 | 1.06 | 1.09 | 1.15 | 1.12 | 6.80E-01 | 5.85E-01 | 8.37E-01 | 7.70E-01 |
| XP_016882575.1 | EPS15L1  | epidermal growth factor receptor substrate 15-like 1 isoform X1     | 0.92 | 1.03 | 0.94 | 1.01 | 1.82E-04 | 2.45E-07 | 9.37E-02 | 2.62E-02 |
| NP_001129115.1 | DCTN4    | dynactin subunit 4 isoform a                                        | 1.05 | 0.96 | 1.01 | 1.02 | 2.67E-01 | 1.64E-01 | 1.52E-01 | 6.15E-02 |
| NP_001337261.1 | TOM1L2   | TOM1-like protein 2 isoform 9                                       | 1.08 | 0.92 | 0.99 | 1.13 | 1.20E-01 | 5.25E-02 | 8.49E-02 | 2.09E-02 |
| NP_055192.1    | DNAJC2   | dnaJ homolog subfamily C member 2 isoform 1                         | 0.95 | 1.10 | 1.05 | 1.06 | 1.53E-01 | 7.51E-02 | 1.15E-01 | 3.81E-02 |
| NP_004986.1    | MMP14    | matrix metalloproteinase-14                                         | 0.97 | 1.02 | 0.99 | 1.04 | 4.45E-01 | 3.24E-01 | 4.44E-01 | 3.16E-01 |
| NP_958931.1    | KLC4     | kinesin light chain 4 isoform b                                     | 1.12 | 0.96 | 1.03 | 1.17 | 7.68E-01 | 6.90E-01 | 7.46E-01 | 6.58E-01 |
| XP_016885242.1 | SMS      | spermine synthase isoform X1                                        | 1.11 | 1.06 | 1.19 | 1.09 | 2.67E-02 | 4.01E-03 | 1.31E-01 | 4.79E-02 |
| XP_016872373.1 | ACBD5    | acyl-CoA-binding domain-containing protein 5 isoform X1             | 1.01 | 0.99 | 1.00 | 1.02 | 1.18E-02 | 7.90E-04 | 4.76E-01 | 3.49E-01 |
| NP_001139110.2 | GPSM1    | G-protein-signaling modulator 1 isoform a                           | 1.11 | 0.96 | 1.06 | 1.09 | 4.47E-02 | 1.06E-02 | 8.84E-02 | 2.31E-02 |
| NP_068593.2    | MRPS35   | 28S ribosomal protein S35, mitochondrial isoform 1 precursor        | 1.05 | 0.99 | 1.04 | 1.01 | 3.86E-02 | 7.99E-03 | 1.56E-01 | 6.51E-02 |
| XP_024302967.1 | PTK2     | focal adhesion kinase 1 isoform X1                                  | 1.11 | 0.99 | 1.10 | 1.07 | 6.08E-02 | 1.85E-02 | 9.69E-02 | 2.77E-02 |
| NP_057501.2    | GLRX5    | glutaredoxin-related protein 5, mitochondrial precursor             | 0.89 | 0.99 | 0.87 | 0.96 | 1.06E-01 | 4.36E-02 | 2.00E-01 | 9.63E-02 |
| NP_001229687.1 | HLA-A    | HLA class I histocompatibility antigen, A alpha chain A*01:01:01:01 | 0.92 | 0.87 | 0.81 | 0.98 | 5.88E-01 | 4.79E-01 | 8.12E-01 | 7.39E-01 |
| NP_071761.1    | TFB2M    | dimethyladenosine transferase 2, mitochondrial                      | 1.05 | 0.98 | 1.03 | 1.04 | 5.46E-01 | 4.31E-01 | 4.21E-01 | 2.93E-01 |
| NP_002938.1    | RPA3     | replication protein A 14 kDa subunit                                | 0.85 | 0.96 | 0.82 | 0.80 | 4.82E-01 | 3.64E-01 | 5.84E-01 | 4.68E-01 |
| NP_055857.1    | ZNF609   | zinc finger protein 609                                             | 0.90 | 1.00 | 0.90 | 1.02 | 5.14E-02 | 1.39E-02 | 7.52E-02 | 1.58E-02 |
| XP_016864496.1 | SYNPO    | synaptopodin isoform X1                                             | 0.94 | 0.99 | 0.94 | 0.99 | 1.59E-01 | 7.92E-02 | 6.48E-01 | 5.42E-01 |
| NP_001029097.1 | TIAL1    | nucleolysin TIAR isoform 2                                          | 1.14 | 0.94 | 1.07 | 1.04 | 1.61E-01 | 8.06E-02 | 1.27E-01 | 4.48E-02 |
| NP_699160.2    | ALDH16A1 | aldehyde dehydrogenase family 16 member A1 isoform 1                | 1.03 | 1.01 | 1.04 | 1.06 | 5.85E-01 | 4.76E-01 | 7.88E-01 | 7.10E-01 |
| XP_016882814.1 | UBXN6    | UBX domain-containing protein 6 isoform X1                          | 1.44 | 1.08 | 1.59 | 1.18 | 5.74E-01 | 4.63E-01 | 6.76E-01 | 5.72E-01 |
| NP_003245.1    | TIMP1    | metalloproteinase inhibitor 1 precursor                             | 0.76 | 0.91 | 0.70 | 0.91 | 1.20E-01 | 5.24E-02 | 2.20E-01 | 1.10E-01 |
| NP_000182.2    | HMGCL    | hydroxymethylglutaryl-CoA lyase, mitochondrial isoform 1 precursor  | 1.02 | 1.02 | 1.04 | 1.02 | 8.37E-01 | 7.74E-01 | 9.92E-01 | 9.87E-01 |
| NP_001041675.1 | CLCC1    | chloride channel CLIC-like protein 1 isoform 1 precursor            | 1.10 | 1.09 | 1.19 | 1.13 | 2.60E-01 | 1.58E-01 | 9.22E-01 | 8.88E-01 |
| NP_072097.2    | VPS16    | vacuolar protein sorting-associated protein 16 homolog isoform 1    | 1.02 | 1.01 | 1.03 | 1.10 | 7.22E-01 | 6.35E-01 | 8.39E-01 | 7.75E-01 |
| NP_060220.3    | RETSAT   | all-trans-retinol 13,14-reductase precursor                         | 0.99 | 1.07 | 1.06 | 1.03 | 5.48E-01 | 4.35E-01 | 3.24E-01 | 2.00E-01 |
| XP_011531007.1 | PSME4    | proteasome activator complex subunit 4 isoform X1                   | 1.11 | 0.85 | 0.94 | 1.06 | 2.55E-02 | 3.64E-03 | 1.07E-01 | 3.30E-02 |
| XP_016868853.1 | GTF2E2   | transcription initiation factor IIE subunit beta isoform X1         | 1.18 | 0.79 | 0.89 | 1.00 | 7.19E-01 | 6.31E-01 | 4.85E-01 | 3.58E-01 |
| XP_011524074.1 | THOC1    | THO complex subunit 1 isoform X1                                    | 0.94 | 1.13 | 1.03 | 1.09 | 7.96E-01 | 7.24E-01 | 6.47E-01 | 5.38E-01 |
| NP_002573.1    | PARN     | poly(A)-specific ribonuclease PARN isoform 1                        | 1.02 | 0.98 | 0.99 | 1.03 | 7.77E-01 | 6.99E-01 | 5.48E-01 | 4.26E-01 |
| NP_001303969.1 | GLB1     | beta-galactosidase isoform d precursor                              | 0.95 | 0.95 | 0.90 | 0.97 | 4.87E-02 | 1.24E-02 | 9.81E-01 | 9.71E-01 |
| NP_006734.1    | RBM3     | RNA-binding protein 3                                               | 0.51 | 0.97 | 0.49 | 0.88 | 6.78E-02 | 2.18E-02 | 9.03E-02 | 2.40E-02 |
| NP_061903.2    | DHX29    | ATP-dependent RNA helicase DHX29 isoform 1                          | 1.01 | 1.04 | 1.04 | 1.01 | 8.64E-01 | 8.09E-01 | 7.33E-01 | 6.42E-01 |
| XP_011511125.1 | LPP      | lipoma-preferred partner isoform X1                                 | 0.99 | 0.95 | 0.94 | 1.01 | 8.88E-01 | 8.43E-01 | 6.90E-01 | 5.88E-01 |
| NP_085056.2    | CYB5B    | cytochrome b5 type B                                                | 1.04 | 0.98 | 1.02 | 1.06 | 2.31E-01 | 1.33E-01 | 2.51E-01 | 1.35E-01 |

|                 |         |                                                                                                  |      |      |      |      |          |          |          |          |
|-----------------|---------|--------------------------------------------------------------------------------------------------|------|------|------|------|----------|----------|----------|----------|
| NP_008982.1     | FAF1    | FAS-associated factor 1                                                                          | 1.00 | 1.05 | 1.05 | 1.00 | 5.92E-01 | 4.84E-01 | 6.60E-02 | 1.12E-02 |
| NP_001308948.1  | NDUFA10 | NADH dehydrogenase [ubiquinone] 1 alpha subcomplex subunit 10, mitochondrial isoform 2 precursor | 0.97 | 0.98 | 0.95 | 0.97 | 5.67E-01 | 4.57E-01 | 8.58E-01 | 8.00E-01 |
| XP_006723917.1  | ELMO2   | engulfment and cell motility protein 2 isoform X1                                                | 1.04 | 1.04 | 1.09 | 1.03 | 1.92E-01 | 1.04E-01 | 9.74E-01 | 9.61E-01 |
| NP_001252518.1  | RTN3    | reticulon-3 isoform e                                                                            | 1.08 | 1.11 | 1.19 | 1.04 | 2.56E-01 | 1.54E-01 | 6.47E-01 | 5.37E-01 |
| XP_0111513814.1 | UPP1    | uridine phosphorylase 1 isoform X1                                                               | 1.00 | 0.97 | 0.97 | 0.97 | 9.17E-01 | 8.79E-01 | 3.16E-01 | 1.92E-01 |
| XP_006712541.1  | AGFG1   | arf-GAP domain and FG repeat-containing protein 1 isoform X1                                     | 1.04 | 0.99 | 1.04 | 1.03 | 6.04E-01 | 4.98E-01 | 5.61E-01 | 4.39E-01 |
| NP_001289936.1  | DDAH2   | N(G),N(G)-dimethylarginine dimethylaminohydrolase 2                                              | 1.12 | 0.97 | 1.09 | 1.07 | 1.56E-01 | 7.68E-02 | 1.36E-01 | 5.11E-02 |
| NP_0010931115.1 | RPL22L1 | 60S ribosomal protein L22-like 1 isoform 1                                                       | 0.78 | 1.04 | 0.81 | 0.93 | 7.95E-02 | 2.79E-02 | 9.03E-02 | 2.42E-02 |
| XP_005270647.1  | CC2D1B  | coiled-coil and C2 domain-containing protein 1B isoform X1                                       | 1.05 | 0.99 | 1.04 | 1.05 | 3.47E-01 | 2.31E-01 | 3.13E-01 | 1.89E-01 |
| NP_001306168.1  | ZC3H11A | zinc finger CCCH domain-containing protein 11A isoform 1                                         | 1.01 | 1.01 | 1.03 | 1.13 | 8.47E-01 | 7.86E-01 | 9.47E-01 | 9.25E-01 |
| NP_942568.2     | TBC1D9B | TBC1 domain family member 9B isoform a                                                           | 1.06 | 0.98 | 1.04 | 1.03 | 4.88E-02 | 1.25E-02 | 2.63E-01 | 1.44E-01 |
| XP_016882391.1  | GATAD2A | transcriptional repressor p66-alpha isoform X2                                                   | 0.88 | 1.07 | 0.94 | 0.96 | 4.18E-02 | 9.34E-03 | 8.11E-02 | 1.88E-02 |
| NP_060272.3     | DNAAF5  | dynein assembly factor 5, axonemal                                                               | 1.01 | 0.92 | 0.92 | 1.02 | 9.06E-01 | 8.65E-01 | 5.27E-01 | 4.04E-01 |
| NP_004335.1     | CENT2   | centrin-2                                                                                        | 0.79 | 1.01 | 0.79 | 0.94 | 4.49E-02 | 1.07E-02 | 7.60E-02 | 1.61E-02 |
| XP_016868897.1  | RBM12B  | RNA-binding protein 12B isoform X1                                                               | 1.10 | 1.55 | 1.72 | 1.19 | 1.34E-01 | 6.17E-02 | 7.37E-01 | 6.47E-01 |
| NP_075567.2     | UBE2Z   | ubiquitin-conjugating enzyme E2 Z                                                                | 1.13 | 0.87 | 0.97 | 0.99 | 3.51E-01 | 2.35E-01 | 2.88E-01 | 1.66E-01 |
| NP_060895.1     | PI4K2A  | phosphatidylinositol 4-kinase type 2-alpha                                                       | 1.20 | 1.00 | 1.19 | 1.17 | 5.55E-02 | 1.59E-02 | 1.04E-01 | 3.14E-02 |
| NP_001435.1     | FABP5   | fatty acid-binding protein 5                                                                     | 0.99 | 1.08 | 1.07 | 1.12 | 4.87E-02 | 1.24E-02 | 3.53E-02 | 1.47E-03 |
| NP_002989.2     | SDC2    | syndecan-2 precursor                                                                             | 0.75 | 1.00 | 0.76 | 0.96 | 1.51E-02 | 1.38E-03 | 3.53E-02 | 1.35E-03 |
| NP_062538.5     | RNF20   | E3 ubiquitin-protein ligase BRE1A                                                                | 0.82 | 1.02 | 0.83 | 1.00 | 6.78E-02 | 2.18E-02 | 8.55E-02 | 2.12E-02 |
| XP_011533481.1  | RBM26   | RNA-binding protein 26 isoform X1                                                                | 1.00 | 0.96 | 0.96 | 1.00 | 1.19E-01 | 5.17E-02 | 1.14E-01 | 3.70E-02 |
| XP_005250519.1  | PUS7    | pseudouridylate synthase 7 homolog isoform X1                                                    | 0.86 | 1.14 | 0.95 | 1.05 | 5.80E-01 | 4.70E-01 | 5.39E-01 | 4.17E-01 |
| NP_001257368.1  | ARPC5   | actin-related protein 2/3 complex subunit 5 isoform 2                                            | 0.91 | 1.06 | 0.96 | 0.99 | 3.54E-01 | 2.38E-01 | 2.65E-01 | 1.46E-01 |
| NP_005827.1     | RIDA    | 2-iminobutanoate/2-iminopropanoate deaminase                                                     | 1.03 | 1.00 | 1.02 | 1.09 | 1.36E-02 | 1.07E-03 | 4.25E-01 | 2.97E-01 |
| NP_001264003.1  | CCDC12  | coiled-coil domain-containing protein 12 isoform 2                                               | 0.84 | 1.04 | 0.87 | 1.04 | 4.78E-02 | 1.18E-02 | 6.88E-02 | 1.29E-02 |
| XP_011520054.2  | UACA    | uveal autoantigen with coiled-coil domains and ankyrin repeats isoform X1                        | 1.10 | 0.99 | 1.09 | 1.15 | 6.77E-01 | 5.81E-01 | 6.62E-01 | 5.57E-01 |
| XP_024306483.1  | GPS1    | COP9 signalosome complex subunit 1 isoform X3                                                    | 1.03 | 0.97 | 1.00 | 1.01 | 3.48E-01 | 2.31E-01 | 1.88E-01 | 8.77E-02 |
| NP_001239007.1  | USP15   | ubiquitin carboxyl-terminal hydrolase 15 isoform 1                                               | 1.02 | 0.99 | 1.01 | 0.97 | 8.26E-01 | 7.59E-01 | 7.37E-01 | 6.46E-01 |
| NP_036344.2     | PTGR1   | prostaglandin reductase 1 isoform 1                                                              | 1.09 | 0.93 | 1.01 | 1.10 | 3.38E-02 | 6.17E-03 | 6.91E-02 | 1.30E-02 |
| NP_110395.1     | ILKAP   | integrin-linked kinase-associated serine/threonine phosphatase 2C                                | 1.00 | 0.96 | 0.96 | 0.98 | 9.80E-01 | 9.70E-01 | 5.14E-01 | 3.90E-01 |
| NP_002196.4     | ITGA5   | integrin alpha-5 precursor                                                                       | 1.04 | 0.98 | 1.01 | 1.08 | 4.23E-01 | 3.04E-01 | 2.65E-01 | 1.46E-01 |
| NP_001316712.1  | HACD2   | very-long-chain (3R)-3-hydroxyacyl-CoA dehydratase 2 isoform a                                   | 1.04 | 1.07 | 1.12 | 1.06 | 3.00E-02 | 4.94E-03 | 4.72E-01 | 3.44E-01 |
| NP_005923.3     | MIPEP   | mitochondrial intermediate peptidase                                                             | 1.18 | 1.06 | 1.25 | 1.14 | 1.68E-01 | 8.62E-02 | 2.99E-01 | 1.76E-01 |
| NP_113651.4     | HSDL1   | inactive hydroxysteroid dehydrogenase-like protein 1 isoform a                                   | 0.93 | 0.91 | 0.85 | 0.92 | 4.19E-01 | 2.98E-01 | 8.44E-01 | 7.82E-01 |
| NP_078813.1     | CARS2   | probable cysteine--tRNA ligase, mitochondrial isoform 1                                          | 1.07 | 0.98 | 1.04 | 1.07 | 1.91E-01 | 1.02E-01 | 1.55E-01 | 6.41E-02 |
| NP_904358.2     | TSC22D1 | TSC22 domain family protein 1 isoform 1                                                          | 0.89 | 1.02 | 0.91 | 1.01 | 1.80E-01 | 9.46E-02 | 1.72E-01 | 7.59E-02 |
| NP_001098016.1  | RPP30   | ribonuclease P protein subunit p30 isoform a                                                     | 1.02 | 1.13 | 1.14 | 0.96 | 8.64E-01 | 8.09E-01 | 8.37E-01 | 7.70E-01 |
| XP_005263479.1  | UBE4B   | ubiquitin conjugation factor E4 B isoform X1                                                     | 1.07 | 1.00 | 1.06 | 1.08 | 5.23E-01 | 4.08E-01 | 7.33E-01 | 6.42E-01 |
| NP_068817.1     | SEC24A  | protein transport protein Sec24A isoform 1                                                       | 1.14 | 0.92 | 1.05 | 1.02 | 1.63E-02 | 1.60E-03 | 3.66E-02 | 1.90E-03 |
| NP_597677.2     | NIPBL   | nipped-B-like protein isoform A                                                                  | 1.01 | 0.99 | 1.00 | 1.02 | 1.84E-01 | 9.71E-02 | 6.89E-01 | 5.87E-01 |
| XP_024307399.1  | RAD23A  | UV excision repair protein RAD23 homolog A isoform X1                                            | 1.11 | 0.87 | 0.97 | 1.09 | 4.19E-02 | 9.40E-03 | 3.63E-02 | 1.85E-03 |
| XP_005264438.1  | TMEM214 | transmembrane protein 214 isoform X1                                                             | 1.03 | 1.02 | 1.05 | 1.10 | 5.17E-01 | 4.02E-01 | 8.58E-01 | 8.01E-01 |
| NP_060810.2     | CPED1   | serine/threonine-protein phosphatase CPED1 isoform a                                             | 1.00 | 0.97 | 0.97 | 1.03 | 9.42E-01 | 9.18E-01 | 6.53E-01 | 5.47E-01 |
| NP_001887.1     | CSNK2A2 | casein kinase II subunit alpha'                                                                  | 0.99 | 0.95 | 0.92 | 1.05 | 9.22E-01 | 8.85E-01 | 9.11E-01 | 8.70E-01 |
| NP_003189.2     | ELOA    | elongin-A                                                                                        | 0.97 | 1.03 | 1.00 | 1.08 | 2.62E-01 | 1.59E-01 | 1.70E-01 | 7.44E-02 |
| NP_659486.2     | UBLCP1  | ubiquitin-like domain-containing CTD phosphatase 1                                               | 0.98 | 0.98 | 0.96 | 1.07 | 3.10E-02 | 5.18E-03 | 9.19E-01 | 8.83E-01 |
| XP_011518601.1  | CHID1   | chitinase domain-containing protein 1 isoform X1                                                 | 0.97 | 1.07 | 1.04 | 1.05 | 4.51E-01 | 3.32E-01 | 2.56E-01 | 1.39E-01 |

|                |              |                                                                                                         |      |      |      |      |          |          |          |          |
|----------------|--------------|---------------------------------------------------------------------------------------------------------|------|------|------|------|----------|----------|----------|----------|
| NP_443077.1    | MMAB         | corrino adenosyltransferase precursor                                                                   | 0.93 | 1.04 | 0.97 | 1.11 | 3.71E-01 | 2.53E-01 | 2.56E-01 | 1.39E-01 |
| XP_011537270.1 | FMNL3        | formin-like protein 3 isoform X1                                                                        | 1.14 | 0.96 | 1.10 | 1.09 | 1.66E-01 | 8.42E-02 | 3.18E-01 | 1.94E-01 |
| NP_065147.1    | DDX24        | ATP-dependent RNA helicase DDX24                                                                        | 0.97 | 1.09 | 1.05 | 1.05 | 6.73E-01 | 5.76E-01 | 3.00E-01 | 1.77E-01 |
| NP_002255.3    | KPNA1        | importin subunit alpha-5                                                                                | 0.94 | 1.08 | 1.01 | 0.95 | 8.27E-02 | 2.99E-02 | 7.52E-02 | 1.57E-02 |
| NP_005821.2    | MRPS31       | 28S ribosomal protein S31, mitochondrial                                                                | 1.00 | 0.97 | 0.96 | 1.01 | 8.99E-01 | 8.58E-01 | 5.05E-01 | 3.80E-01 |
| XP_016877241.1 | MTA1         | metastasis-associated protein MTA1 isoform X1                                                           | 0.98 | 0.98 | 0.96 | 0.98 | 2.46E-01 | 1.45E-01 | 9.79E-01 | 9.70E-01 |
| NP_115558.3    | ABRAXAS2     | BRISC complex subunit Abraxas 2                                                                         | 1.09 | 1.01 | 1.11 | 1.10 | 6.36E-01 | 5.35E-01 | 7.53E-01 | 6.66E-01 |
| NP_003253.1    | SEC62        | translocation protein SEC62                                                                             | 1.19 | 1.02 | 1.21 | 1.06 | 2.28E-03 | 3.51E-05 | 8.06E-02 | 1.86E-02 |
| NP_006741.1    | SNTB2        | beta-2-syntrophin                                                                                       | 0.92 | 1.06 | 0.98 | 1.02 | 1.01E-01 | 4.04E-02 | 1.55E-01 | 6.39E-02 |
| XP_011523944.1 | SMCHD1       | structural maintenance of chromosomes flexible hinge domain-containing protein 1 isoform X1             | 1.02 | 0.91 | 0.92 | 1.04 | 7.68E-01 | 6.89E-01 | 3.68E-01 | 2.40E-01 |
| NP_001188408.1 | CORO7-PAM16  | CORO7-PAM16 protein                                                                                     | 1.09 | 0.98 | 1.07 | 1.04 | 9.33E-02 | 3.55E-02 | 1.02E-01 | 3.02E-02 |
| NP_057038.2    | DERA         | deoxyribose-phosphate aldolase isoform 1                                                                | 1.02 | 0.95 | 0.97 | 1.03 | 6.13E-01 | 5.07E-01 | 2.44E-01 | 1.29E-01 |
| NP_054894.1    | MRPL15       | 39S ribosomal protein L15, mitochondrial                                                                | 1.02 | 1.01 | 1.02 | 1.03 | 9.26E-01 | 8.91E-01 | 9.71E-01 | 9.57E-01 |
| NP_008869.1    | SNRPD1       | small nuclear ribonucleoprotein Sm D1 isoform 1                                                         | 1.12 | 0.77 | 0.86 | 1.01 | 2.03E-01 | 1.12E-01 | 9.15E-02 | 2.50E-02 |
| NP_001257366.1 | CDC42EP3     | cdc42 effector protein 3                                                                                | 0.92 | 0.96 | 0.88 | 1.10 | 2.87E-02 | 4.57E-03 | 6.48E-01 | 5.41E-01 |
| NP_037366.1    | EIF3K        | eukaryotic translation initiation factor 3 subunit K isoform 1                                          | 0.94 | 0.91 | 0.86 | 0.97 | 3.00E-02 | 4.95E-03 | 1.02E-01 | 3.02E-02 |
| NP_115758.3    | COG8         | conserved oligomeric Golgi complex subunit 8 isoform 1                                                  | 1.01 | 1.00 | 1.01 | 1.02 | 8.36E-01 | 7.73E-01 | 7.94E-01 | 7.19E-01 |
| NP_056399.1    | POLDIP2      | polymerase delta-interacting protein 2 isoform 1                                                        | 1.13 | 0.95 | 1.08 | 1.10 | 3.79E-02 | 7.73E-03 | 7.02E-02 | 1.34E-02 |
| NP_003155.2    | STX5         | syntaxin-5 isoform 1                                                                                    | 1.00 | 1.01 | 1.01 | 1.03 | 9.68E-01 | 9.54E-01 | 8.81E-01 | 8.31E-01 |
| NP_001358293.1 | DUS4L-BCAP29 | DUS4L-BCAP29 protein isoform a                                                                          | 1.06 | 1.02 | 1.08 | 1.11 | 3.12E-01 | 2.00E-01 | 5.10E-01 | 3.87E-01 |
| XP_024302215.1 | MYO6         | unconventional myosin-VI isoform X1                                                                     | 1.04 | 1.10 | 1.12 | 0.97 | 9.18E-01 | 8.81E-01 | 8.30E-01 | 7.63E-01 |
| NP_116021.2    | PAPOLA       | poly(A) polymerase alpha isoform 1                                                                      | 1.08 | 0.89 | 0.95 | 1.11 | 7.20E-01 | 6.33E-01 | 3.88E-01 | 2.59E-01 |
| NP_000935.1    | PPP3CA       | serine/threonine-protein phosphatase 2B catalytic subunit alpha isoform isoform 1                       | 0.95 | 1.03 | 0.97 | 1.02 | 2.30E-02 | 3.03E-03 | 7.02E-02 | 1.34E-02 |
| NP_001303937.1 | S100A16      | protein S100-A16                                                                                        | 1.01 | 1.00 | 1.00 | 1.04 | 8.82E-01 | 8.35E-01 | 8.53E-01 | 7.94E-01 |
| NP_001186125.1 | ARMC6        | armadillo repeat-containing protein 6 isoform 1                                                         | 1.08 | 0.91 | 0.97 | 1.05 | 5.17E-01 | 4.01E-01 | 3.85E-01 | 2.56E-01 |
| XP_005250207.1 | CUX1         | Homeobox protein cut-like 1 isoform X1                                                                  | 1.07 | 0.94 | 1.00 | 1.07 | 3.66E-01 | 2.48E-01 | 4.11E-01 | 2.82E-01 |
| NP_689968.1    | CNPY4        | protein canopy homolog 4 precursor                                                                      | 0.92 | 1.01 | 0.93 | 0.95 | 2.80E-01 | 1.75E-01 | 3.08E-01 | 1.84E-01 |
| NP_055500.1    | HERPUD1      | homocysteine-responsive endoplasmic reticulum-resident ubiquitin-like domain member 1 protein isoform 1 | 0.84 | 0.99 | 0.82 | 1.01 | 1.22E-01 | 5.43E-02 | 4.59E-01 | 3.31E-01 |
| XP_005254454.1 | MYO5A        | unconventional myosin-Va isoform X3                                                                     | 1.00 | 0.97 | 0.96 | 0.99 | 9.71E-01 | 9.58E-01 | 8.46E-01 | 7.84E-01 |
| XP_011533354.1 | GTF2F2       | general transcription factor IIF subunit 2 isoform X1                                                   | 1.05 | 0.98 | 1.02 | 1.02 | 4.25E-01 | 3.05E-01 | 4.36E-01 | 3.08E-01 |
| NP_001338100.1 | NT5C2        | cytosolic purine 5'-nucleotidase isoform 2                                                              | 1.13 | 0.88 | 0.99 | 1.13 | 2.12E-01 | 1.19E-01 | 1.24E-01 | 4.32E-02 |
| NP_000480.3    | ATRX         | transcriptional regulator ATRX isoform 1                                                                | 0.85 | 0.92 | 0.79 | 0.99 | 1.68E-02 | 1.75E-03 | 3.11E-01 | 1.87E-01 |
| XP_024304777.1 | ERGIC2       | endoplasmic reticulum-Golgi intermediate compartment protein 2 isoform X1                               | 1.21 | 0.81 | 0.97 | 1.02 | 3.43E-01 | 2.27E-01 | 3.10E-01 | 1.86E-01 |
| NP_733779.1    | SKP1         | S-phase kinase-associated protein 1 isoform b                                                           | 0.72 | 1.08 | 0.78 | 0.90 | 2.53E-02 | 3.57E-03 | 4.78E-02 | 4.20E-03 |
| NP_932157.1    | PHC2         | polyhomeotic-like protein 2 isoform a                                                                   | 1.06 | 0.94 | 1.00 | 1.02 | 5.66E-02 | 1.64E-02 | 1.38E-01 | 5.27E-02 |
| NP_036448.1    | KPNA6        | importin subunit alpha-7                                                                                | 0.93 | 1.05 | 0.98 | 1.05 | 1.72E-01 | 8.88E-02 | 1.50E-01 | 6.05E-02 |
| NP_001306593.1 | TMEM263      | transmembrane protein 263 isoform a                                                                     | 1.11 | 1.03 | 1.16 | 1.11 | 5.69E-01 | 4.59E-01 | 7.82E-01 | 7.02E-01 |
| NP_057185.1    | NIP7         | 60S ribosome subunit biogenesis protein NIP7 homolog isoform 1                                          | 0.92 | 0.79 | 0.73 | 0.85 | 3.19E-01 | 2.07E-01 | 4.44E-01 | 3.15E-01 |
| NP_055077.2    | P3H3         | prolyl 3-hydroxylase 3 precursor                                                                        | 0.79 | 1.18 | 0.92 | 0.95 | 3.11E-02 | 5.26E-03 | 6.60E-02 | 1.12E-02 |
| NP_001658.2    | ARL2         | ADP-ribosylation factor-like protein 2 isoform 1                                                        | 1.12 | 0.94 | 1.05 | 1.09 | 5.23E-01 | 4.08E-01 | 3.73E-01 | 2.45E-01 |
| NP_071934.3    | INF2         | inverted formin-2 isoform 1                                                                             | 0.91 | 0.95 | 0.87 | 0.93 | 4.78E-03 | 1.41E-04 | 4.30E-01 | 3.02E-01 |
| XP_011538901.1 | OSBPL9       | oxysterol-binding protein-related protein 9 isoform X1                                                  | 1.05 | 0.92 | 0.97 | 1.11 | 3.63E-02 | 7.12E-03 | 1.15E-01 | 3.75E-02 |
| NP_001127666.1 | ACPP         | prostatic acid phosphatase isoform TM-PAP precursor                                                     | 1.15 | 0.86 | 0.99 | 1.07 | 2.96E-01 | 1.87E-01 | 1.42E-01 | 5.50E-02 |
| NP_001128342.1 | PPP1R18      | phostensin                                                                                              | 1.01 | 1.03 | 1.04 | 1.17 | 7.69E-03 | 3.35E-04 | 4.73E-01 | 3.46E-01 |
| NP_149351.1    | SURF4        | surfeit locus protein 4 isoform 1                                                                       | 1.09 | 0.95 | 1.04 | 0.98 | 5.04E-01 | 3.88E-01 | 3.97E-01 | 2.67E-01 |
| NP_001257412.1 | TST          | thiosulfate sulfurtransferase                                                                           | 0.87 | 1.13 | 0.98 | 0.89 | 4.10E-02 | 8.97E-03 | 1.38E-01 | 5.27E-02 |

|                |          |                                                                                   |      |      |      |      |          |          |          |          |
|----------------|----------|-----------------------------------------------------------------------------------|------|------|------|------|----------|----------|----------|----------|
| XP_005247415.1 | ATP2C1   | calcium-transporting ATPase type 2C member 1 isoform X4                           | 1.10 | 1.00 | 1.11 | 1.08 | 1.16E-01 | 4.94E-02 | 1.45E-01 | 5.67E-02 |
| NP_008841.2    | RBBP6    | E3 ubiquitin-protein ligase RBBP6 isoform 1                                       | 1.02 | 1.02 | 1.04 | 1.04 | 7.91E-01 | 7.18E-01 | 9.78E-01 | 9.67E-01 |
| NP_009034.2    | NDUFV1   | NADH dehydrogenase [ubiquinone] flavoprotein 1, mitochondrial isoform 1 precursor | 1.02 | 0.86 | 0.88 | 0.99 | 4.40E-01 | 3.20E-01 | 5.97E-02 | 8.96E-03 |
| NP_055956.1    | GPD1L    | glycerol-3-phosphate dehydrogenase 1-like protein                                 | 1.04 | 1.02 | 1.06 | 1.08 | 2.03E-01 | 1.13E-01 | 4.29E-01 | 3.01E-01 |
| NP_004365.1    | COX6C    | cytochrome c oxidase subunit 6C                                                   | 1.05 | 1.04 | 1.08 | 1.07 | 2.02E-02 | 2.41E-03 | 7.25E-01 | 6.28E-01 |
| NP_005393.2    | RALA     | ras-related protein Ral-A precursor                                               | 0.98 | 1.05 | 1.03 | 0.95 | 8.53E-01 | 7.93E-01 | 6.06E-01 | 4.91E-01 |
| NP_001340896.1 | STAMBP   | STAM-binding protein isoform 1                                                    | 1.11 | 0.91 | 1.01 | 1.07 | 8.02E-02 | 2.83E-02 | 9.07E-02 | 2.46E-02 |
| XP_024302098.1 | COX7A2   | cytochrome c oxidase subunit 7A2, mitochondrial isoform X1                        | 1.28 | 0.75 | 0.95 | 1.20 | 7.44E-02 | 2.52E-02 | 5.34E-02 | 6.25E-03 |
| NP_037425.1    | TRA2A    | transformer-2 protein homolog alpha isoform 1                                     | 0.98 | 0.92 | 0.90 | 0.98 | 7.78E-01 | 7.01E-01 | 6.09E-01 | 4.95E-01 |
| XP_024302907.1 | CPSF1    | cleavage and polyadenylation specificity factor subunit 1 isoform X1              | 1.03 | 0.99 | 1.02 | 1.02 | 4.37E-01 | 3.18E-01 | 3.64E-01 | 2.35E-01 |
| XP_016880222.1 | ANKFY1   | rabankyrin-5 isoform X1                                                           | 0.96 | 1.02 | 0.98 | 1.08 | 3.88E-01 | 2.69E-01 | 2.88E-01 | 1.67E-01 |
| NP_000840.2    | GSTM3    | glutathione S-transferase Mu 3                                                    | 1.21 | 1.00 | 1.21 | 1.29 | 1.30E-01 | 5.94E-02 | 2.70E-01 | 1.51E-01 |
| NP_037379.1    | HTRA2    | serine protease HTRA2, mitochondrial isoform 1                                    | 1.04 | 1.02 | 1.06 | 1.02 | 2.72E-02 | 4.14E-03 | 6.87E-01 | 5.85E-01 |
| NP_001317135.1 | MIEN1    | migration and invasion enhancer 1 isoform 2                                       | 0.90 | 1.04 | 0.93 | 0.98 | 3.54E-02 | 6.80E-03 | 6.77E-02 | 1.22E-02 |
| NP_055446.2    | SH3PXD2A | SH3 and PX domain-containing protein 2A isoform 1                                 | 1.15 | 1.11 | 1.28 | 1.23 | 2.20E-02 | 2.79E-03 | 3.62E-01 | 2.33E-01 |
| NP_001269516.1 | H6PD     | GDH/6PGL endoplasmic bifunctional protein isoform 1 precursor                     | 1.03 | 0.97 | 1.00 | 1.00 | 8.28E-01 | 7.62E-01 | 6.88E-01 | 5.86E-01 |
| NP_009172.2    | SNF8     | vacuolar-sorting protein SNF8 isoform 1                                           | 1.05 | 0.98 | 1.03 | 1.05 | 3.00E-01 | 1.91E-01 | 2.49E-01 | 1.33E-01 |
| NP_038472.2    | UBQLN2   | ubiquilin-2                                                                       | 1.05 | 1.05 | 1.11 | 1.04 | 2.69E-01 | 1.66E-01 | 9.73E-01 | 9.60E-01 |
| XP_024303217.1 | ALAD     | delta-aminolevulinic acid dehydratase isoform X1                                  | 0.98 | 1.08 | 1.05 | 0.94 | 8.70E-01 | 8.17E-01 | 6.09E-01 | 4.95E-01 |
| NP_008909.1    | RNF113A  | E3 ubiquitin-protein ligase RNF113A                                               | 0.83 | 1.04 | 0.87 | 1.00 | 1.09E-01 | 4.53E-02 | 1.58E-01 | 6.62E-02 |
| XP_006710537.1 | KDM1A    | lysine-specific histone demethylase 1A isoform X1                                 | 0.90 | 0.91 | 0.83 | 0.93 | 6.42E-01 | 5.43E-01 | 9.77E-01 | 9.64E-01 |
| NP_057156.1    | GOLT1B   | vesicle transport protein GOT1B                                                   | 1.30 | 0.81 | 1.03 | 1.01 | 2.73E-01 | 1.69E-01 | 2.25E-01 | 1.13E-01 |
| NP_001346122.1 | HLA-DRB1 | major histocompatibility complex, class II, DR beta 1 precursor                   | 1.05 | 0.77 | 0.81 | 1.16 | 4.40E-01 | 3.20E-01 | 7.57E-02 | 1.59E-02 |
| NP_001295169.1 | MICOS13  | MICOS complex subunit MIC13 isoform 1                                             | 0.93 | 1.03 | 0.96 | 0.92 | 6.21E-02 | 1.90E-02 | 6.17E-02 | 9.70E-03 |
| XP_005267899.1 | PPP4R3A  | serine/threonine-protein phosphatase 4 regulatory subunit 3A isoform X1           | 1.11 | 0.92 | 1.03 | 1.06 | 1.16E-01 | 4.98E-02 | 8.00E-02 | 1.81E-02 |
| NP_075566.3    | PYCR3    | pyrroline-5-carboxylate reductase 3 isoform 1                                     | 1.03 | 0.93 | 0.96 | 0.98 | 7.87E-01 | 7.12E-01 | 4.27E-01 | 2.99E-01 |
| XP_016876094.1 | PCCA     | propionyl-CoA carboxylase alpha chain, mitochondrial isoform X1                   | 1.07 | 1.07 | 1.15 | 1.13 | 2.55E-01 | 1.53E-01 | 9.82E-01 | 9.74E-01 |
| NP_006318.1    | TIMM23   | mitochondrial import inner membrane translocase subunit Tim23                     | 0.93 | 1.00 | 0.93 | 1.09 | 5.22E-02 | 1.43E-02 | 3.07E-01 | 1.84E-01 |
| XP_016880525.1 | ASPSCR1  | tether containing UBX domain for GLUT4 isoform X1                                 | 1.10 | 0.92 | 1.01 | 1.10 | 5.43E-02 | 1.53E-02 | 8.65E-02 | 2.18E-02 |
| NP_006147.1    | NEDD8    | NEDD8 precursor                                                                   | 0.99 | 0.96 | 0.95 | 0.96 | 1.53E-01 | 7.49E-02 | 3.88E-01 | 2.59E-01 |
| XP_011532415.1 | CCDC51   | mitochondrial potassium channel isoform X1                                        | 1.08 | 1.01 | 1.09 | 1.11 | 9.79E-02 | 3.83E-02 | 1.36E-01 | 5.12E-02 |
| XP_011508084.1 | OTUD7B   | OTU domain-containing protein 7B isoform X1                                       | 0.99 | 0.95 | 0.94 | 1.04 | 9.30E-01 | 9.00E-01 | 6.28E-01 | 5.16E-01 |
| NP_002484.1    | NDUFB6   | NADH dehydrogenase [ubiquinone] 1 beta subcomplex subunit 6 isoform 1             | 1.05 | 1.07 | 1.12 | 1.16 | 1.11E-01 | 4.71E-02 | 7.82E-01 | 7.02E-01 |
| NP_001243764.1 | QTRT2    | queuine tRNA-ribosyltransferase accessory subunit 2 isoform 2                     | 1.15 | 0.80 | 0.91 | 1.01 | 3.84E-01 | 2.66E-01 | 3.54E-01 | 2.26E-01 |
| NP_112179.2    | FIP1L1   | pre-mRNA 3'-end-processing factor FIP1 isoform 1                                  | 0.90 | 1.00 | 0.91 | 0.99 | 7.08E-02 | 2.33E-02 | 1.38E-01 | 5.25E-02 |
| NP_064621.3    | MRPL1    | 39S ribosomal protein L1, mitochondrial precursor                                 | 1.07 | 0.99 | 1.06 | 1.04 | 3.67E-01 | 2.49E-01 | 3.94E-01 | 2.65E-01 |
| XP_024306343.1 | MRPL10   | 39S ribosomal protein L10, mitochondrial isoform X1                               | 0.97 | 0.95 | 0.92 | 0.89 | 8.18E-01 | 7.50E-01 | 9.77E-01 | 9.66E-01 |
| XP_024305846.1 | EDC3     | enhancer of mRNA-decapping protein 3 isoform X1                                   | 1.05 | 0.91 | 0.96 | 1.01 | 2.69E-01 | 1.65E-01 | 1.76E-01 | 7.93E-02 |
| NP_062826.2    | METTL3   | N6-adenosine-methyltransferase catalytic subunit                                  | 1.00 | 1.05 | 1.05 | 1.01 | 9.69E-01 | 9.56E-01 | 5.05E-01 | 3.79E-01 |
| NP_653237.1    | CHCHD4   | mitochondrial intermembrane space import and assembly protein 40 isoform 2        | 0.79 | 1.02 | 0.80 | 0.95 | 1.05E-01 | 4.30E-02 | 1.20E-01 | 4.11E-02 |
| XP_024307971.1 | SUN2     | SUN domain-containing protein 2 isoform X1                                        | 1.10 | 1.05 | 1.15 | 1.12 | 6.33E-01 | 5.29E-01 | 8.40E-01 | 7.76E-01 |
| NP_001258670.1 | CSNK1A1  | casein kinase 1 isoform alpha isoform 3                                           | 1.03 | 0.99 | 1.02 | 1.14 | 3.89E-01 | 2.70E-01 | 3.23E-01 | 1.98E-01 |
| XP_005265184.1 | LAMB2    | laminin subunit beta-2 isoform X1                                                 | 0.94 | 1.04 | 0.98 | 1.09 | 3.28E-01 | 2.14E-01 | 2.15E-01 | 1.06E-01 |
| NP_644810.1    | WDR36    | WD repeat-containing protein 36                                                   | 1.09 | 0.96 | 1.04 | 1.02 | 4.51E-02 | 1.08E-02 | 5.00E-02 | 4.90E-03 |
| NP_002805.1    | PSMD10   | 26S proteasome non-ATPase regulatory subunit 10 isoform 1                         | 1.03 | 1.04 | 1.07 | 1.03 | 6.69E-01 | 5.71E-01 | 8.67E-01 | 8.13E-01 |
| NP_001280569.1 | WASHC4   | WASH complex subunit 4 isoform 1                                                  | 1.07 | 0.90 | 0.97 | 1.13 | 2.04E-01 | 1.13E-01 | 2.17E-01 | 1.08E-01 |
| XP_005264506.2 | BIRC6    | baculoviral IAP repeat-containing protein 6 isoform X1                            | 1.00 | 0.95 | 0.96 | 1.02 | 9.81E-01 | 9.73E-01 | 5.24E-01 | 4.01E-01 |

|                |           |                                                                                       |      |      |      |      |          |          |          |          |
|----------------|-----------|---------------------------------------------------------------------------------------|------|------|------|------|----------|----------|----------|----------|
| NP_004126.1    | IDH3G     | isocitrate dehydrogenase [NAD] subunit gamma, mitochondrial isoform a precursor       | 1.10 | 0.95 | 1.04 | 1.06 | 7.71E-02 | 2.67E-02 | 2.37E-01 | 1.23E-01 |
| NP_067000.1    | LSM2      | U6 snRNA-associated Sm-like protein LSM2                                              | 1.22 | 0.78 | 0.94 | 0.98 | 1.70E-01 | 8.72E-02 | 2.41E-01 | 1.26E-01 |
| NP_653182.1    | L3HYPDH   | trans-3-hydroxy-L-proline dehydratase isoform a                                       | 1.09 | 0.99 | 1.08 | 1.12 | 1.11E-01 | 4.69E-02 | 1.22E-01 | 4.19E-02 |
| NP_056005.1    | DNAJC9    | dnaJ homolog subfamily C member 9                                                     | 0.99 | 1.01 | 1.00 | 1.03 | 7.55E-01 | 6.74E-01 | 7.53E-01 | 6.66E-01 |
| XP_011535239.1 | ARHGEF40  | rho guanine nucleotide exchange factor 40 isoform X1                                  | 1.00 | 0.93 | 0.94 | 0.98 | 9.87E-01 | 9.82E-01 | 5.68E-01 | 4.51E-01 |
| NP_001139247.1 | FKBP5     | peptidyl-prolyl cis-trans isomerase FKBP5 isoform 1                                   | 1.02 | 0.97 | 0.99 | 1.04 | 9.53E-02 | 3.66E-02 | 2.66E-01 | 1.47E-01 |
| NP_001830.1    | CNN3      | calponin-3 isoform 1                                                                  | 1.00 | 1.02 | 1.02 | 1.14 | 9.09E-01 | 8.69E-01 | 7.69E-01 | 6.86E-01 |
| XP_006711467.2 | PPOX      | protoporphyrinogen oxidase isoform X8                                                 | 1.19 | 0.87 | 1.00 | 1.05 | 6.17E-01 | 5.13E-01 | 4.67E-01 | 3.40E-01 |
| NP_110438.1    | MRPS26    | 28S ribosomal protein S26, mitochondrial                                              | 1.22 | 0.85 | 1.02 | 1.01 | 4.45E-01 | 3.25E-01 | 3.10E-01 | 1.87E-01 |
| NP_060586.2    | MST01     | protein misato homolog 1 isoform a                                                    | 1.10 | 0.97 | 1.07 | 1.08 | 1.29E-02 | 9.58E-04 | 5.98E-02 | 8.97E-03 |
| NP_002084.2    | GSK3B     | glycogen synthase kinase-3 beta isoform 1                                             | 1.02 | 0.93 | 0.94 | 1.08 | 8.98E-01 | 8.55E-01 | 5.58E-01 | 4.36E-01 |
| NP_777567.1    | PPP4R2    | serine/threonine-protein phosphatase 4 regulatory subunit 2 isoform 1                 | 0.96 | 0.99 | 0.95 | 1.06 | 5.15E-02 | 1.40E-02 | 5.66E-01 | 4.46E-01 |
| NP_851853.1    | LEMD2     | LEM domain-containing protein 2 isoform 1                                             | 1.17 | 1.05 | 1.24 | 1.03 | 2.66E-01 | 1.62E-01 | 4.65E-01 | 3.37E-01 |
| NP_004482.4    | ARHGAP35  | rho GTPase-activating protein 35                                                      | 1.00 | 0.87 | 0.88 | 0.94 | 9.86E-01 | 9.78E-01 | 2.05E-01 | 1.00E-01 |
| NP_061164.3    | ARL6IP4   | ADP-ribosylation factor-like protein 6-interacting protein 4 isoform 1                | 0.88 | 1.01 | 0.89 | 0.97 | 7.27E-02 | 2.42E-02 | 3.19E-01 | 1.94E-01 |
| NP_037466.2    | GMPPB     | mannose-1-phosphate guanyltransferase beta isoform 1                                  | 1.06 | 1.03 | 1.09 | 1.04 | 7.27E-02 | 2.42E-02 | 3.24E-01 | 1.99E-01 |
| NP_009167.1    | CHP1      | calcineurin B homologous protein 1                                                    | 1.02 | 1.03 | 1.04 | 1.11 | 9.35E-01 | 9.06E-01 | 9.27E-01 | 8.96E-01 |
| NP_001272979.1 | FAM168A   | protein FAM168A isoform 1                                                             | 0.77 | 0.96 | 0.74 | 0.97 | 8.07E-02 | 2.88E-02 | 3.61E-01 | 2.33E-01 |
| NP_001129058.1 | C5orf24   | UPF0461 protein C5orf24 isoform 1                                                     | 0.88 | 0.99 | 0.87 | 1.00 | 5.44E-02 | 1.54E-02 | 1.03E-01 | 3.10E-02 |
| NP_057019.3    | EEF1AKNMT | eEF1A lysine and N-terminal methyltransferase isoform 1                               | 1.11 | 0.91 | 1.01 | 1.06 | 1.61E-01 | 8.10E-02 | 9.22E-02 | 2.55E-02 |
| XP_011519460.1 | HMG20A    | high mobility group protein 20A isoform X1                                            | 0.98 | 0.84 | 0.81 | 0.99 | 8.95E-01 | 8.52E-01 | 5.34E-01 | 4.11E-01 |
| XP_016864840.1 | SH3PXD2B  | SH3 and PX domain-containing protein 2B isoform X1                                    | 1.05 | 1.10 | 1.15 | 1.12 | 1.79E-02 | 1.93E-03 | 6.63E-01 | 5.58E-01 |
| NP_079478.1    | EFHD1     | EF-hand domain-containing protein D1 isoform 1                                        | 0.82 | 1.26 | 0.97 | 0.87 | 6.07E-01 | 5.01E-01 | 4.58E-01 | 3.30E-01 |
| NP_001350643.1 | ZMYND8    | protein kinase C-binding protein 1 isoform s                                          | 0.85 | 1.01 | 0.85 | 0.98 | 2.55E-02 | 3.68E-03 | 8.74E-02 | 2.24E-02 |
| NP_001491.1    | GMDS      | GDP-mannose 4,6 dehydratase isoform 1                                                 | 1.05 | 0.93 | 0.98 | 1.02 | 5.64E-02 | 1.62E-02 | 2.09E-01 | 1.03E-01 |
| NP_002660.1    | PLRG1     | pleiotropic regulator 1 isoform 1                                                     | 0.99 | 1.00 | 0.99 | 1.01 | 8.30E-01 | 7.64E-01 | 9.44E-01 | 9.19E-01 |
| XP_016861617.1 | GAP43     | neuromodulin isoform X1                                                               | 0.98 | 1.05 | 0.88 | 1.13 | 8.78E-01 | 8.29E-01 | 9.46E-01 | 9.22E-01 |
| NP_006030.2    | MRC2      | C-type mannose receptor 2 precursor                                                   | 0.94 | 0.97 | 0.92 | 1.10 | 4.82E-02 | 1.21E-02 | 1.88E-01 | 8.82E-02 |
| NP_057113.1    | DHRS7     | dehydrogenase/reductase SDR family member 7 isoform 1 precursor                       | 1.12 | 1.06 | 1.19 | 1.11 | 2.29E-01 | 1.32E-01 | 6.47E-01 | 5.37E-01 |
| NP_060245.3    | TTC19     | tetratricopeptide repeat protein 19, mitochondrial isoform 1 precursor                | 0.98 | 1.02 | 1.00 | 1.06 | 5.04E-02 | 1.31E-02 | 2.31E-01 | 1.19E-01 |
| NP_055726.3    | AAK1      | AP2-associated protein kinase 1 isoform 1                                             | 1.05 | 0.97 | 1.02 | 1.10 | 8.40E-02 | 3.05E-02 | 7.19E-02 | 1.44E-02 |
| XP_011508833.1 | FMNL2     | formin-like protein 2 isoform X2                                                      | 1.19 | 0.97 | 1.15 | 1.16 | 2.62E-01 | 1.59E-01 | 3.39E-01 | 2.12E-01 |
| XP_024304387.1 | SCYL1     | N-terminal kinase-like protein isoform X1                                             | 1.06 | 1.00 | 1.06 | 1.01 | 4.04E-01 | 2.84E-01 | 4.91E-01 | 3.64E-01 |
| NP_291025.3    | INTS4     | integrator complex subunit 4                                                          | 1.23 | 0.85 | 1.04 | 1.09 | 3.58E-02 | 6.92E-03 | 2.61E-01 | 1.42E-01 |
| NP_115716.1    | UQCC2     | ubiquinol-cytochrome-c reductase complex assembly factor 2                            | 1.12 | 0.90 | 1.00 | 1.11 | 1.02E-01 | 4.09E-02 | 1.79E-01 | 8.16E-02 |
| NP_001350747.1 | MTX3      | metaxin-3 isoform 3                                                                   | 1.17 | 0.96 | 1.12 | 1.12 | 3.89E-02 | 8.24E-03 | 1.15E-01 | 3.81E-02 |
| NP_036270.1    | AATF      | protein AATF                                                                          | 1.03 | 0.98 | 1.01 | 1.10 | 4.02E-01 | 2.82E-01 | 4.97E-01 | 3.72E-01 |
| NP_004779.2    | UBE4A     | ubiquitin conjugation factor E4 A isoform 1                                           | 1.00 | 1.00 | 1.00 | 0.99 | 9.89E-01 | 9.85E-01 | 9.94E-01 | 9.90E-01 |
| NP_001540.2    | IFIT3     | interferon-induced protein with tetratricopeptide repeats 3 isoform a                 | 0.94 | 0.91 | 0.85 | 1.08 | 2.56E-01 | 1.54E-01 | 4.95E-01 | 3.69E-01 |
| NP_001243093.1 | TMCO1     | calcium load-activated calcium channel isoform b                                      | 1.13 | 1.04 | 1.18 | 1.08 | 1.63E-01 | 8.22E-02 | 2.90E-01 | 1.68E-01 |
| NP_060616.1    | MRM3      | rRNA methyltransferase 3, mitochondrial isoform 1 precursor                           | 1.08 | 1.14 | 1.23 | 1.09 | 4.01E-02 | 8.62E-03 | 1.03E-01 | 3.09E-02 |
| NP_001091952.1 | CRTC1     | CREB-regulated transcription coactivator 1 isoform 3                                  | 0.95 | 1.05 | 1.00 | 1.16 | 8.10E-02 | 2.91E-02 | 5.44E-01 | 4.23E-01 |
| XP_011532107.1 | TEX264    | testis-expressed protein 264 isoform X2                                               | 1.19 | 1.12 | 1.34 | 1.12 | 1.45E-01 | 6.97E-02 | 6.15E-01 | 5.01E-01 |
| NP_001171112.1 | DAG1      | dystroglycan                                                                          | 1.12 | 0.88 | 0.98 | 1.03 | 6.16E-01 | 5.11E-01 | 3.72E-01 | 2.43E-01 |
| NP_004993.1    | NDUFA9    | NADH dehydrogenase [ubiquinone] 1 alpha subcomplex subunit 9, mitochondrial precursor | 1.17 | 0.98 | 1.15 | 1.07 | 2.59E-01 | 1.56E-01 | 2.85E-01 | 1.64E-01 |
| NP_031388.2    | NCBP2     | nuclear cap-binding protein subunit 2 isoform 1                                       | 0.97 | 0.91 | 0.88 | 1.10 | 5.47E-01 | 4.33E-01 | 2.93E-01 | 1.72E-01 |
| NP_006775.1    | WDR3      | WD repeat-containing protein 3                                                        | 1.01 | 0.95 | 0.96 | 1.01 | 9.55E-01 | 9.36E-01 | 6.16E-01 | 5.02E-01 |

|                |            |                                                                     |      |      |      |      |          |          |          |          |
|----------------|------------|---------------------------------------------------------------------|------|------|------|------|----------|----------|----------|----------|
| NP_006824.2    | COPS6      | COP9 signalosome complex subunit 6                                  | 1.11 | 0.93 | 1.03 | 1.04 | 4.49E-02 | 1.07E-02 | 9.10E-02 | 2.48E-02 |
| NP_002711.1    | PPP4C      | serine/threonine-protein phosphatase 4 catalytic subunit isoform 1  | 1.01 | 0.86 | 0.87 | 1.00 | 8.32E-01 | 7.68E-01 | 6.77E-02 | 1.22E-02 |
| NP_054781.1    | NOB1       | RNA-binding protein NOB1                                            | 1.02 | 0.98 | 1.00 | 1.05 | 4.19E-01 | 2.99E-01 | 3.44E-01 | 2.17E-01 |
| NP_000988.1    | RPL37      | 60S ribosomal protein L37                                           | 0.67 | 1.33 | 0.89 | 0.77 | 2.19E-02 | 2.76E-03 | 3.53E-02 | 1.25E-03 |
| XP_011544423.1 | BCL2L13    | bcl-2-like protein 13 isoform X2                                    | 1.08 | 0.94 | 1.01 | 1.02 | 3.10E-01 | 1.98E-01 | 1.70E-01 | 7.47E-02 |
| NP_115865.1    | MRPS6      | 28S ribosomal protein S6, mitochondrial                             | 0.89 | 1.00 | 0.89 | 1.01 | 8.91E-02 | 3.35E-02 | 1.14E-01 | 3.65E-02 |
| NP_612441.1    | SDSL       | serine dehydratase-like                                             | 1.02 | 1.02 | 1.04 | 1.05 | 3.22E-01 | 2.10E-01 | 8.82E-01 | 8.33E-01 |
| NP_071446.2    | MRPL46     | 39S ribosomal protein L46, mitochondrial                            | 1.07 | 0.92 | 0.99 | 1.09 | 9.33E-02 | 3.56E-02 | 2.34E-01 | 1.21E-01 |
| XP_011508213.1 | SOAT1      | sterol O-acyltransferase 1 isoform X1                               | 1.01 | 1.04 | 1.05 | 1.08 | 8.72E-01 | 8.19E-01 | 5.72E-01 | 4.55E-01 |
| NP_001988.1    | FAU        | ubiquitin-like protein fubi and ribosomal protein S30 precursor     | 0.81 | 1.07 | 0.87 | 0.85 | 2.51E-02 | 3.52E-03 | 3.69E-02 | 1.96E-03 |
| XP_011537850.1 | WAPL       | wings apart-like protein homolog isoform X1                         | 1.12 | 0.84 | 0.94 | 1.00 | 5.95E-02 | 1.78E-02 | 1.05E-01 | 3.17E-02 |
| NP_653337.1    | NDUFAF7    | protein arginine methyltransferase NDUFAF7, mitochondrial isoform 1 | 1.12 | 0.96 | 1.08 | 1.10 | 1.37E-01 | 6.37E-02 | 1.15E-01 | 3.78E-02 |
| NP_001268231.1 | GFM2       | ribosome-releasing factor 2, mitochondrial isoform 4                | 1.03 | 0.97 | 1.00 | 1.09 | 2.87E-03 | 5.92E-05 | 1.27E-01 | 4.57E-02 |
| XP_006724089.1 | MRPL39     | 39S ribosomal protein L39, mitochondrial isoform X2                 | 0.99 | 0.97 | 0.96 | 1.04 | 5.24E-01 | 4.09E-01 | 5.61E-01 | 4.40E-01 |
| NP_003578.2    | DHX16      | pre-mRNA-splicing factor ATP-dependent RNA helicase DHX16 isoform 1 | 0.97 | 1.01 | 0.98 | 1.10 | 6.71E-01 | 5.74E-01 | 6.45E-01 | 5.35E-01 |
| NP_006256.1    | RAD21      | double-strand-break repair protein rad21 homolog                    | 0.97 | 1.02 | 0.99 | 1.08 | 1.51E-02 | 1.36E-03 | 2.65E-01 | 1.46E-01 |
| NP_065796.2    | AARS2      | alanine--tRNA ligase, mitochondrial                                 | 0.95 | 1.03 | 0.97 | 1.01 | 3.89E-01 | 2.70E-01 | 3.09E-01 | 1.85E-01 |
| XP_016878127.1 | CDE276     | CD276 antigen isoform X1                                            | 0.98 | 1.02 | 1.01 | 0.98 | 2.09E-01 | 1.16E-01 | 5.82E-01 | 4.67E-01 |
| NP_647473.1    | YME1L1     | ATP-dependent zinc metalloprotease YME1L1 isoform 1                 | 1.04 | 0.90 | 0.91 | 1.13 | 9.24E-01 | 8.88E-01 | 6.84E-01 | 5.81E-01 |
| NP_004634.1    | PABPN1     | polyadenylate-binding protein 2 isoform 1                           | 0.80 | 1.08 | 0.87 | 0.92 | 1.09E-01 | 4.52E-02 | 9.14E-02 | 2.50E-02 |
| NP_005031.1    | PRCP       | lysosomal Pro-X carboxypeptidase isoform 1                          | 1.05 | 1.05 | 1.10 | 1.05 | 6.60E-01 | 5.63E-01 | 9.24E-01 | 8.92E-01 |
| NP_705618.1    | NUP155     | nuclear pore complex protein Nup155 isoform 1                       | 1.14 | 0.99 | 1.12 | 1.11 | 1.86E-01 | 9.90E-02 | 2.53E-01 | 1.36E-01 |
| NP_005643.2    | TERF2      | telomeric repeat-binding factor 2                                   | 1.02 | 1.03 | 1.02 | 1.02 | 9.69E-01 | 9.55E-01 | 9.95E-01 | 9.92E-01 |
| NP_006729.4    | AKAP13     | A-kinase anchor protein 13 isoform 1                                | 1.02 | 0.95 | 0.98 | 1.10 | 3.44E-01 | 2.28E-01 | 1.60E-01 | 6.78E-02 |
| NP_008964.3    | RER1       | protein RER1                                                        | 0.97 | 1.02 | 0.98 | 0.95 | 7.45E-01 | 6.63E-01 | 7.58E-01 | 6.72E-01 |
| NP_443107.1    | VPS26B     | vacuolar protein sorting-associated protein 26B                     | 1.17 | 0.97 | 1.11 | 1.35 | 6.81E-01 | 5.87E-01 | 6.38E-01 | 5.26E-01 |
| NP_057025.2    | ATP6V1H    | V-type proton ATPase subunit H isoform 1                            | 1.32 | 1.23 | 1.69 | 1.18 | 4.51E-01 | 3.32E-01 | 8.86E-01 | 8.37E-01 |
| NP_057662.3    | RSF1       | remodeling and spacing factor 1                                     | 0.96 | 1.02 | 0.98 | 1.03 | 6.90E-01 | 5.96E-01 | 6.71E-01 | 5.67E-01 |
| NP_001185987.1 | ARPN-AP3S2 | C15orf38-AP3S2 fusion protein                                       | 0.91 | 1.03 | 0.94 | 1.01 | 2.11E-02 | 2.62E-03 | 4.43E-02 | 3.17E-03 |
| NP_060853.3    | WDR33      | pre-mRNA 3' end processing protein WDR33 isoform 1                  | 0.97 | 0.97 | 0.94 | 1.05 | 3.11E-01 | 1.99E-01 | 9.42E-01 | 9.15E-01 |
| NP_001317344.1 | LARP4      | la-related protein 4 isoform g                                      | 1.07 | 0.84 | 0.89 | 1.02 | 7.43E-01 | 6.61E-01 | 3.65E-01 | 2.36E-01 |
| NP_067066.1    | ABRACL     | costars family protein ABRACL                                       | 0.95 | 1.05 | 0.99 | 0.83 | 7.09E-01 | 6.19E-01 | 5.36E-01 | 4.14E-01 |
| NP_003889.1    | SYNJ2      | synaptojanin-2 isoform 1                                            | 1.02 | 1.00 | 1.02 | 1.10 | 2.81E-02 | 4.31E-03 | 8.58E-01 | 8.01E-01 |
| NP_808800.1    | GOLM1      | Golgi membrane protein 1                                            | 0.85 | 1.08 | 0.92 | 1.03 | 2.54E-01 | 1.52E-01 | 1.84E-01 | 8.53E-02 |
| NP_001008212.1 | OPTN       | optineurin                                                          | 0.85 | 1.17 | 1.00 | 1.01 | 6.99E-02 | 2.27E-02 | 6.87E-02 | 1.27E-02 |
| NP_001112362.1 | GLRX       | glutaredoxin-1                                                      | 0.93 | 1.05 | 0.98 | 1.11 | 9.56E-02 | 3.69E-02 | 7.58E-02 | 1.60E-02 |
| NP_054727.1    | CCDC22     | coiled-coil domain-containing protein 22                            | 1.12 | 0.94 | 1.05 | 1.07 | 3.24E-01 | 2.11E-01 | 2.77E-01 | 1.57E-01 |
| NP_872375.2    | GDPD1      | lysophospholipase D GDPD1 isoform 1                                 | 1.00 | 1.13 | 1.14 | 1.15 | 9.87E-01 | 9.83E-01 | 4.57E-01 | 3.29E-01 |
| XP_016885226.1 | UPF3B      | regulator of nonsense transcripts 3B isoform X1                     | 1.04 | 0.92 | 0.95 | 1.03 | 8.40E-01 | 7.78E-01 | 5.92E-01 | 4.78E-01 |
| NP_001015049.1 | BAG5       | BAG family molecular chaperone regulator 5 isoform a                | 1.02 | 1.05 | 1.07 | 1.02 | 9.35E-01 | 9.06E-01 | 7.93E-01 | 7.15E-01 |
| XP_005248173.1 | TMEM33     | transmembrane protein 33 isoform X1                                 | 1.17 | 0.93 | 1.09 | 1.22 | 1.30E-01 | 5.93E-02 | 1.27E-01 | 4.49E-02 |
| XP_024304327.1 | PAK1       | serine/threonine-protein kinase PAK 1 isoform X2                    | 0.96 | 1.04 | 0.99 | 0.94 | 7.51E-01 | 6.70E-01 | 6.17E-01 | 5.03E-01 |
| XP_016866973.1 | WDR46      | WD repeat-containing protein 46 isoform X1                          | 0.89 | 0.86 | 0.78 | 0.87 | 5.93E-01 | 4.85E-01 | 9.24E-01 | 8.91E-01 |
| NP_076943.1    | TRIR       | telomerase RNA component interacting RNase isoform 1                | 0.85 | 1.03 | 0.87 | 1.04 | 1.15E-02 | 7.23E-04 | 5.79E-02 | 7.96E-03 |
| NP_001272808.1 | CEBPB      | CCAAT/enhancer-binding protein beta isoform c                       | 1.08 | 0.95 | 1.03 | 1.14 | 4.68E-03 | 1.32E-04 | 1.84E-01 | 8.47E-02 |
| NP_001229971.1 | HLA-C      | HLA class I histocompatibility antigen, C alpha chain precursor     | 0.52 | 1.48 | 0.77 | 0.84 | 8.87E-03 | 4.32E-04 | 3.53E-02 | 1.23E-03 |
| NP_006393.2    | LAMTOR5    | ragulator complex protein LAMTOR5                                   | 0.94 | 1.15 | 1.09 | 1.26 | 7.80E-01 | 7.04E-01 | 4.88E-01 | 3.61E-01 |

|                |          |                                                                          |      |      |      |      |          |          |          |          |
|----------------|----------|--------------------------------------------------------------------------|------|------|------|------|----------|----------|----------|----------|
| NP_006398.1    | ARL6IP5  | PRA1 family protein 3                                                    | 1.16 | 1.03 | 1.19 | 1.10 | 1.16E-02 | 7.44E-04 | 4.04E-02 | 2.36E-03 |
| NP_055969.1    | MESD     | LRP chaperone MESD precursor                                             | 1.09 | 1.01 | 1.10 | 1.09 | 4.96E-02 | 1.28E-02 | 1.43E-01 | 5.57E-02 |
| NP_001124151.1 | EIF4E    | eukaryotic translation initiation factor 4E isoform 2                    | 1.07 | 1.03 | 1.10 | 1.00 | 4.06E-01 | 2.85E-01 | 7.32E-01 | 6.40E-01 |
| NP_006387.1    | ZNRD2    | protein ZNRD2 isoform 1                                                  | 1.06 | 0.96 | 1.02 | 1.04 | 4.49E-01 | 3.30E-01 | 4.53E-01 | 3.24E-01 |
| XP_011524044.1 | SEHL     | nucleoporin SEH1 isoform X1                                              | 0.96 | 1.16 | 1.10 | 0.95 | 8.48E-01 | 7.87E-01 | 5.41E-01 | 4.19E-01 |
| XP_016858797.1 | NUP35    | nucleoporin NUP35 isoform X1                                             | 1.03 | 1.03 | 1.06 | 1.06 | 3.68E-02 | 7.35E-03 | 9.64E-01 | 9.47E-01 |
| XP_006715898.1 | CDK6     | cyclin-dependent kinase 6 isoform X1                                     | 1.12 | 1.04 | 1.17 | 1.05 | 7.48E-02 | 2.54E-02 | 1.88E-01 | 8.79E-02 |
| NP_001101.1    | ADAM10   | disintegrin and metalloproteinase domain-containing protein 10 isoform 1 | 0.87 | 0.94 | 0.81 | 0.97 | 5.09E-02 | 1.36E-02 | 4.65E-01 | 3.37E-01 |
| XP_011511846.1 | AFAP1    | actin filament-associated protein 1 isoform X1                           | 0.98 | 0.97 | 0.95 | 1.12 | 6.16E-01 | 5.11E-01 | 9.17E-01 | 8.79E-01 |
| NP_060831.2    | AGPAT5   | 1-acyl-sn-glycerol-3-phosphate acyltransferase epsilon                   | 1.17 | 0.91 | 1.06 | 1.08 | 2.26E-01 | 1.29E-01 | 1.59E-01 | 6.68E-02 |
| NP_001093896.1 | RAP1GDS1 | rap1 GTPase-GDP dissociation stimulator 1 isoform 1                      | 1.45 | 0.70 | 1.00 | 1.05 | 9.65E-02 | 3.74E-02 | 1.40E-01 | 5.38E-02 |
| NP_115570.1    | RPF2     | ribosome production factor 2 homolog isoform 1                           | 0.98 | 1.12 | 1.10 | 0.99 | 1.09E-01 | 4.55E-02 | 4.55E-02 | 3.68E-03 |
| NP_005699.1    | GPC6     | glypican-6 precursor                                                     | 1.08 | 0.87 | 0.93 | 0.99 | 3.70E-02 | 7.44E-03 | 5.24E-01 | 4.01E-01 |
| XP_005268509.2 | PCDH1    | protocadherin-1 isoform X1                                               | 1.09 | 1.18 | 1.28 | 1.04 | 2.03E-01 | 1.12E-01 | 4.16E-01 | 2.88E-01 |
| NP_001012750.1 | DCTD     | deoxycytidylate deaminase isoform a                                      | 1.07 | 1.30 | 1.40 | 1.07 | 4.13E-02 | 9.05E-03 | 7.30E-01 | 6.36E-01 |
| NP_001333475.2 | CRAT     | carnitine O-acetyltransferase isoform 3                                  | 1.02 | 0.98 | 1.00 | 0.96 | 8.48E-01 | 7.88E-01 | 7.14E-01 | 6.16E-01 |
| NP_115714.1    | LLPH     | protein LLP homolog                                                      | 0.85 | 1.03 | 0.88 | 0.94 | 3.59E-02 | 6.97E-03 | 1.00E-01 | 2.93E-02 |
| NP_063937.2    | GSK3A    | glycogen synthase kinase-3 alpha                                         | 0.94 | 1.01 | 0.95 | 0.99 | 5.53E-01 | 4.40E-01 | 5.59E-01 | 4.37E-01 |
| XP_011521726.1 | NOL3     | nucleolar protein 3 isoform X1                                           | 0.83 | 1.01 | 0.84 | 1.02 | 4.78E-02 | 1.19E-02 | 7.21E-02 | 1.48E-02 |
| NP_852127.2    | MRPL55   | 39S ribosomal protein L55, mitochondrial isoform b                       | 1.03 | 0.94 | 0.97 | 1.09 | 6.63E-01 | 5.65E-01 | 4.13E-01 | 2.85E-01 |
| NP_057370.1    | DCXR     | L-xylulose reductase isoform 1                                           | 1.12 | 0.91 | 1.03 | 1.12 | 3.55E-02 | 6.83E-03 | 4.32E-02 | 2.80E-03 |
| NP_060739.2    | ADI1     | 1,2-dihydroxy-3-keto-5-methylthiopentene dioxygenase isoform 1           | 0.92 | 1.01 | 0.92 | 0.96 | 1.36E-02 | 1.05E-03 | 7.88E-02 | 1.73E-02 |
| NP_055950.2    | NUP205   | nuclear pore complex protein Nup205 isoform 1                            | 1.13 | 0.94 | 1.07 | 1.04 | 2.02E-02 | 2.44E-03 | 9.44E-02 | 2.67E-02 |
| NP_055037.1    | NDUFA8   | NADH dehydrogenase [ubiquinone] 1 alpha subcomplex subunit 8 isoform 1   | 0.93 | 1.09 | 1.01 | 1.12 | 2.65E-01 | 1.61E-01 | 1.54E-01 | 6.27E-02 |
| XP_006722823.1 | NFIX     | nuclear factor 1 X-type isoform X6                                       | 1.04 | 0.95 | 0.99 | 1.15 | 7.51E-01 | 6.70E-01 | 5.69E-01 | 4.53E-01 |
| XP_016877890.1 | DNAJC17  | dnaJ homolog subfamily C member 17 isoform X1                            | 0.90 | 1.02 | 0.92 | 1.02 | 4.92E-01 | 3.75E-01 | 4.49E-01 | 3.21E-01 |
| NP_001257662.1 | BCL2L13  | bcl-2-like protein 13 isoform g                                          | 1.04 | 0.96 | 1.00 | 1.08 | 7.28E-01 | 6.41E-01 | 5.27E-01 | 4.04E-01 |
| NP_001274.1    | AP1S1    | AP-1 complex subunit sigma-1A                                            | 0.96 | 1.07 | 1.02 | 1.05 | 6.41E-01 | 5.41E-01 | 3.44E-01 | 2.17E-01 |
| XP_016877625.1 | IGF1R    | insulin-like growth factor 1 receptor isoform X1                         | 0.89 | 1.17 | 1.03 | 1.06 | 5.28E-01 | 4.13E-01 | 3.66E-01 | 2.37E-01 |
| NP_006432.1    | MTHFS    | 5-formyltetrahydrofolate cyclo-ligase isoform a                          | 1.08 | 0.95 | 1.03 | 1.07 | 6.26E-02 | 1.93E-02 | 8.31E-02 | 1.98E-02 |
| NP_001001888.3 | VCX3B    | variable charge X-linked protein 3B                                      | 0.83 | 1.07 | 0.89 | 0.98 | 2.88E-02 | 4.62E-03 | 8.00E-02 | 1.81E-02 |
| NP_056449.1    | KIFBP    | KIF-binding protein                                                      | 1.10 | 0.84 | 0.93 | 1.03 | 3.13E-01 | 2.02E-01 | 1.14E-01 | 3.65E-02 |
| NP_001009993.2 | FAM168B  | myelin-associated neurite-outgrowth inhibitor                            | 0.91 | 1.17 | 1.07 | 1.16 | 3.38E-01 | 2.22E-01 | 2.36E-01 | 1.23E-01 |
| NP_001216.1    | CASP4    | caspase-4 isoform alpha precursor                                        | 1.10 | 0.91 | 1.00 | 1.13 | 3.27E-02 | 5.79E-03 | 7.04E-02 | 1.36E-02 |
| NP_057056.1    | POLR1D   | DNA-directed RNA polymerases I and III subunit RPAC2 isoform 1           | 0.91 | 1.09 | 1.00 | 1.03 | 3.99E-01 | 2.79E-01 | 2.11E-01 | 1.04E-01 |
| XP_005250580.1 | EXOC4    | exocyst complex component 4 isoform X2                                   | 1.03 | 0.88 | 0.91 | 1.50 | 3.47E-01 | 2.30E-01 | 7.16E-02 | 1.40E-02 |
| NP_006261.1    | RRAS     | ras-related protein R-Ras                                                | 0.94 | 1.12 | 1.06 | 1.07 | 5.17E-01 | 4.02E-01 | 3.44E-01 | 2.17E-01 |
| NP_115984.3    | PPP1R9B  | neurabin-2                                                               | 0.95 | 1.31 | 1.24 | 1.10 | 1.22E-01 | 5.38E-02 | 4.45E-02 | 3.30E-03 |
| NP_001128567.1 | FNDC3B   | fibronectin type III domain-containing protein 3B                        | 0.87 | 0.98 | 0.86 | 1.02 | 2.21E-01 | 1.26E-01 | 3.33E-01 | 2.07E-01 |
| XP_005273855.1 | AMOTL1   | angiomin-like protein 1 isoform X1                                       | 0.84 | 0.94 | 0.79 | 0.90 | 2.00E-01 | 1.09E-01 | 5.01E-01 | 3.76E-01 |
| NP_116147.1    | PHF5A    | PHD finger-like domain-containing protein 5A                             | 0.98 | 0.99 | 0.96 | 1.05 | 1.94E-03 | 2.63E-05 | 3.91E-01 | 2.62E-01 |
| NP_056277.2    | NOL11    | nucleolar protein 11 isoform 1                                           | 1.08 | 0.88 | 0.95 | 1.06 | 5.38E-01 | 4.23E-01 | 3.94E-01 | 2.65E-01 |
| NP_009139.1    | MRPL3    | 39S ribosomal protein L3, mitochondrial                                  | 0.88 | 1.01 | 0.89 | 1.04 | 5.34E-04 | 3.55E-06 | 2.31E-01 | 1.18E-01 |
| NP_003162.2    | SUPV3L1  | ATP-dependent RNA helicase SUPV3L1, mitochondrial isoform 1              | 2.64 | 0.71 | 1.29 | 1.18 | 3.77E-01 | 2.59E-01 | 3.90E-01 | 2.61E-01 |
| NP_835461.2    | ZNF598   | E3 ubiquitin-protein ligase ZNF598                                       | 1.10 | 0.91 | 1.00 | 1.01 | 8.02E-02 | 2.82E-02 | 2.17E-01 | 1.09E-01 |
| NP_443157.1    | LENG8    | leukocyte receptor cluster member 8 isoform 3                            | 1.07 | 0.98 | 1.11 | 1.03 | 8.73E-01 | 8.21E-01 | 8.49E-01 | 7.88E-01 |
| XP_024306306.1 | P3H4     | endoplasmic reticulum protein SC65 isoform X2                            | 0.99 | 0.90 | 0.89 | 1.06 | 4.07E-01 | 2.87E-01 | 2.52E-01 | 1.35E-01 |



|                |         |                                                                                     |      |      |      |      |          |          |          |          |
|----------------|---------|-------------------------------------------------------------------------------------|------|------|------|------|----------|----------|----------|----------|
| NP_005763.3    | RCL1    | RNA 3'-terminal phosphate cyclase-like protein isoform a                            | 0.95 | 1.02 | 0.97 | 1.13 | 4.50E-01 | 3.31E-01 | 3.57E-01 | 2.29E-01 |
| NP_001768.1    | CD47    | leukocyte surface antigen CD47 isoform 1 precursor                                  | 1.05 | 0.99 | 1.04 | 1.05 | 2.46E-01 | 1.45E-01 | 2.61E-01 | 1.42E-01 |
| XP_011533696.1 | ASCC3   | activating signal cointegrator 1 complex subunit 3 isoform X1                       | 1.04 | 0.93 | 0.97 | 1.13 | 1.79E-01 | 9.38E-02 | 4.04E-01 | 2.74E-01 |
| NP_057562.3    | ZC3HC1  | nuclear-interacting partner of ALK isoform 1                                        | 1.13 | 0.92 | 1.04 | 1.06 | 8.03E-02 | 2.85E-02 | 1.04E-01 | 3.16E-02 |
| NP_976043.1    | CHCHD1  | coiled-coil-helix-coiled-coil-helix domain-containing protein 1                     | 1.00 | 1.02 | 1.02 | 1.03 | 6.36E-01 | 5.33E-01 | 3.90E-01 | 2.61E-01 |
| XP_016867448.1 | INTS1   | integrator complex subunit 1 isoform X1                                             | 0.94 | 0.95 | 0.89 | 1.10 | 1.45E-01 | 6.95E-02 | 6.87E-01 | 5.84E-01 |
| NP_057154.2    | MRPS23  | 28S ribosomal protein S23, mitochondrial                                            | 1.07 | 0.91 | 0.97 | 1.05 | 1.22E-01 | 5.38E-02 | 6.26E-02 | 9.97E-03 |
| XP_006712115.1 | KCMF1   | E3 ubiquitin-protein ligase KCMF1 isoform X2                                        | 1.10 | 0.90 | 0.99 | 1.10 | 3.08E-01 | 1.96E-01 | 2.90E-01 | 1.70E-01 |
| XP_005255597.1 | UBE2I   | SUMO-conjugating enzyme UBC9 isoform X1                                             | 1.02 | 1.03 | 1.05 | 1.01 | 6.17E-01 | 5.13E-01 | 8.56E-01 | 7.98E-01 |
| XP_016874924.1 | PHLN1   | periphilin-1 isoform X1                                                             | 0.88 | 1.03 | 0.90 | 0.97 | 1.68E-01 | 8.57E-02 | 1.80E-01 | 8.22E-02 |
| NP_115544.1    | WDR75   | WD repeat-containing protein 75 isoform 1                                           | 1.10 | 0.95 | 1.03 | 1.08 | 1.90E-01 | 1.02E-01 | 2.04E-01 | 9.96E-02 |
| NP_001001795.1 | C8orf82 | UPF0598 protein C8orf82                                                             | 1.09 | 0.92 | 1.00 | 1.20 | 6.17E-01 | 5.13E-01 | 3.83E-01 | 2.54E-01 |
| XP_005251567.1 | PLGRKT  | plasminogen receptor (KT) isoform X1                                                | 1.25 | 1.04 | 1.29 | 1.19 | 6.22E-02 | 1.91E-02 | 1.01E-01 | 2.96E-02 |
| NP_071381.1    | XPNPEP3 | xaa-Pro aminopeptidase 3 isoform 1                                                  | 1.01 | 0.97 | 0.97 | 1.05 | 9.55E-01 | 9.37E-01 | 8.49E-01 | 7.88E-01 |
| XP_005268523.1 | RBM27   | RNA-binding protein 27 isoform X1                                                   | 1.30 | 1.30 | 1.74 | 1.24 | 1.80E-01 | 9.45E-02 | 9.19E-01 | 8.84E-01 |
| XP_005273996.1 | MACROD1 | ADP-ribose glycohydrolase MACROD1 isoform X1                                        | 1.07 | 1.00 | 1.08 | 1.07 | 1.51E-01 | 7.32E-02 | 1.76E-01 | 7.92E-02 |
| NP_001269690.1 | CFAP36  | cilia- and flagella-associated protein 36 isoform a                                 | 0.88 | 1.14 | 1.01 | 1.05 | 3.10E-01 | 1.99E-01 | 1.55E-01 | 6.41E-02 |
| NP_055862.1    | EMC1    | ER membrane protein complex subunit 1 isoform 1 precursor                           | 1.08 | 0.93 | 1.01 | 1.07 | 1.92E-02 | 2.20E-03 | 1.31E-01 | 4.80E-02 |
| NP_064551.3    | MCCC1   | methylcrotonoyl-CoA carboxylase subunit alpha, mitochondrial isoform 1 precursor    | 1.27 | 0.85 | 1.07 | 1.14 | 2.66E-01 | 1.63E-01 | 1.74E-01 | 7.78E-02 |
| NP_055302.1    | ZNF330  | zinc finger protein 330 isoform 1                                                   | 0.96 | 0.96 | 0.92 | 1.02 | 7.49E-01 | 6.67E-01 | 9.56E-01 | 9.36E-01 |
| NP_001307256.1 | CHCHD2  | coiled-coil-helix-coiled-coil-helix domain-containing protein 2 precursor isoform 1 | 1.77 | 1.04 | 1.84 | 1.17 | 1.16E-02 | 7.39E-04 | 3.53E-02 | 1.26E-03 |
| XP_005265804.1 | XOC1    | exocyst complex component 1 isoform X1                                              | 1.12 | 0.94 | 1.04 | 1.16 | 4.33E-01 | 3.12E-01 | 3.09E-01 | 1.85E-01 |
| XP_024304204.1 | TIMM10  | mitochondrial import inner membrane translocase subunit Tim10 isoform X1            | 0.87 | 1.02 | 0.89 | 1.01 | 5.53E-02 | 1.58E-02 | 1.12E-01 | 3.53E-02 |
| NP_001350707.1 | SYNGR2  | synaptogyrin-2 isoform 3                                                            | 1.10 | 1.03 | 1.14 | 1.06 | 2.84E-01 | 1.78E-01 | 4.69E-01 | 3.41E-01 |
| NP_001027553.1 | PQBP1   | polyglutamine-binding protein 1 isoform 1                                           | 0.91 | 0.99 | 0.91 | 1.03 | 9.49E-02 | 3.65E-02 | 1.27E-01 | 4.54E-02 |
| NP_958839.1    | GAS7    | growth arrest-specific protein 7 isoform c                                          | 1.20 | 0.89 | 1.02 | 1.27 | 7.29E-01 | 6.42E-01 | 6.10E-01 | 4.96E-01 |
| NP_003156.1    | STXBP1  | syntaxin-binding protein 1 isoform a                                                | 0.98 | 1.05 | 1.03 | 1.04 | 2.54E-01 | 1.52E-01 | 2.77E-01 | 1.57E-01 |
| NP_061961.2    | PAF1    | RNA polymerase II-associated factor 1 homolog isoform 1                             | 1.26 | 0.64 | 0.81 | 1.14 | 3.02E-01 | 1.92E-01 | 1.18E-01 | 3.97E-02 |
| XP_011528984.1 | PLXNB2  | plexin-B2 isoform X1                                                                | 1.07 | 1.03 | 1.10 | 1.07 | 6.23E-01 | 5.19E-01 | 8.28E-01 | 7.59E-01 |
| NP_001310304.1 | CAMK4   | calcium/calmodulin-dependent protein kinase type IV isoform 1                       | 0.96 | 0.98 | 0.94 | 1.03 | 6.90E-01 | 5.97E-01 | 8.35E-01 | 7.68E-01 |
| NP_001883.4    | CSNK1A1 | casein kinase 1 isoform alpha isoform 2                                             | 0.97 | 0.95 | 0.92 | 1.07 | 7.77E-01 | 6.99E-01 | 8.73E-01 | 8.21E-01 |
| XP_005266969.3 | PNISR   | arginine/serine-rich protein PNISR isoform X1                                       | 0.88 | 1.10 | 0.96 | 0.95 | 4.10E-01 | 2.90E-01 | 3.05E-01 | 1.81E-01 |
| NP_060917.1    | EMC3    | ER membrane protein complex subunit 3                                               | 1.14 | 0.95 | 1.08 | 1.07 | 2.32E-01 | 1.34E-01 | 1.74E-01 | 7.75E-02 |
| NP_004765.2    | MED1    | mediator of RNA polymerase II transcription subunit 1                               | 1.00 | 0.95 | 0.95 | 1.04 | 9.70E-01 | 9.56E-01 | 4.34E-01 | 3.06E-01 |
| NP_004992.2    | NDUFA7  | NADH dehydrogenase [ubiquinone] 1 alpha subcomplex subunit 7                        | 0.95 | 1.04 | 0.98 | 1.08 | 4.74E-01 | 3.57E-01 | 4.23E-01 | 2.94E-01 |
| NP_077304.1    | THTPA   | thiamine-triphosphatase isoform 1                                                   | 1.09 | 0.82 | 0.84 | 1.03 | 8.08E-01 | 7.39E-01 | 5.96E-01 | 4.81E-01 |
| XP_011508451.1 | GORAB   | RAB6-interacting golgin isoform X1                                                  | 0.89 | 0.99 | 0.87 | 1.10 | 2.98E-01 | 1.89E-01 | 4.26E-01 | 2.98E-01 |
| NP_002757.2    | PRPSAP1 | phosphoribosyl pyrophosphate synthase-associated protein 1 isoform 1                | 1.26 | 0.78 | 0.99 | 0.88 | 6.31E-02 | 1.97E-02 | 1.28E-01 | 4.58E-02 |
| XP_011543847.1 | CTPS2   | CTP synthase 2 isoform X1                                                           | 0.95 | 0.97 | 0.93 | 0.97 | 1.16E-02 | 7.57E-04 | 9.78E-01 | 9.68E-01 |
| NP_057673.2    | TIMMDC1 | complex I assembly factor TIMMDC1, mitochondrial precursor                          | 1.02 | 1.12 | 1.15 | 1.06 | 8.64E-01 | 8.08E-01 | 5.81E-01 | 4.65E-01 |
| NP_115875.1    | DCTN5   | dynactin subunit 5 isoform 1                                                        | 1.02 | 0.96 | 0.98 | 1.07 | 8.69E-01 | 8.15E-01 | 6.99E-01 | 5.98E-01 |
| NP_056993.2    | NBAS    | neuroblastoma-amplified sequence                                                    | 0.97 | 1.01 | 0.98 | 1.07 | 6.75E-01 | 5.79E-01 | 6.16E-01 | 5.03E-01 |
| NP_000777.1    | CYP51A1 | lanosterol 14-alpha demethylase isoform 1 precursor                                 | 0.94 | 1.42 | 1.33 | 1.47 | 3.54E-01 | 2.37E-01 | 5.87E-02 | 8.51E-03 |
| NP_036332.2    | B3GAT3  | galactosylgalactosylxylosylprotein 3-beta-glucuronosyltransferase 3 isoform 1       | 1.07 | 0.95 | 1.01 | 1.12 | 1.44E-01 | 6.91E-02 | 2.47E-01 | 1.32E-01 |
| NP_060726.3    | WDR12   | ribosome biogenesis protein WDR12 isoform 1                                         | 1.08 | 0.92 | 1.00 | 1.00 | 3.95E-01 | 2.74E-01 | 2.30E-01 | 1.17E-01 |
| XP_016861539.1 | ZBTB38  | zinc finger and BTB domain-containing protein 38 isoform X1                         | 1.01 | 1.02 | 1.04 | 1.00 | 6.25E-01 | 5.21E-01 | 8.12E-01 | 7.39E-01 |
| NP_001185971.1 | STRA6   | receptor for retinol uptake STRA6 isoform f                                         | 0.80 | 0.86 | 0.69 | 0.96 | 6.26E-02 | 1.93E-02 | 5.10E-01 | 3.86E-01 |

|                |          |                                                                                              |      |      |      |      |          |          |          |          |
|----------------|----------|----------------------------------------------------------------------------------------------|------|------|------|------|----------|----------|----------|----------|
| XP_016879871.1 | ZZEF1    | zinc finger ZZ-type and EF-hand domain-containing protein 1 isoform X1                       | 1.02 | 1.00 | 1.02 | 1.02 | 9.26E-01 | 8.93E-01 | 9.49E-01 | 9.27E-01 |
| NP_057604.1    | C9orf78  | telomere length and silencing protein 1 homolog                                              | 0.88 | 1.00 | 0.88 | 1.02 | 6.72E-03 | 2.61E-04 | 6.51E-02 | 1.07E-02 |
| NP_060932.2    | BRK1     | protein BRICK1                                                                               | 0.98 | 0.96 | 0.94 | 0.94 | 8.07E-01 | 7.38E-01 | 9.12E-01 | 8.72E-01 |
| NP_065724.1    | RAB22A   | ras-related protein Rab-22A                                                                  | 1.55 | 0.64 | 0.96 | 1.20 | 2.02E-01 | 1.12E-01 | 1.83E-01 | 8.39E-02 |
| NP_055412.2    | DNTTIP2  | deoxynucleotidyltransferase terminal-interacting protein 2                                   | 0.95 | 1.00 | 0.95 | 1.03 | 4.36E-01 | 3.16E-01 | 6.22E-01 | 5.10E-01 |
| NP_004918.1    | MRPL49   | 39S ribosomal protein L49, mitochondrial                                                     | 0.84 | 1.11 | 0.93 | 1.02 | 7.98E-02 | 2.80E-02 | 8.79E-02 | 2.28E-02 |
| NP_055182.3    | FAM162A  | protein FAM162A                                                                              | 1.04 | 0.90 | 0.93 | 1.11 | 3.57E-01 | 2.40E-01 | 4.04E-01 | 2.74E-01 |
| XP_011533470.1 | COG6     | conserved oligomeric Golgi complex subunit 6 isoform X1                                      | 1.02 | 0.97 | 0.98 | 1.07 | 7.89E-01 | 7.15E-01 | 6.71E-01 | 5.67E-01 |
| NP_076971.1    | ERI3     | ERI1 exoribonuclease 3 isoform 1                                                             | 1.04 | 0.94 | 0.98 | 1.03 | 3.62E-01 | 2.44E-01 | 4.73E-01 | 3.45E-01 |
| NP_001336206.1 | ANKRD28  | serine/threonine-protein phosphatase 6 regulatory ankyrin repeat subunit A isoform c         | 1.07 | 0.96 | 1.03 | 1.09 | 5.07E-02 | 1.34E-02 | 8.40E-02 | 2.03E-02 |
| NP_036218.1    | GTF3C3   | general transcription factor 3C polypeptide 3 isoform 1                                      | 0.88 | 1.09 | 0.95 | 0.93 | 4.69E-01 | 3.52E-01 | 3.72E-01 | 2.44E-01 |
| XP_005251697.1 | RABEPK   | rab9 effector protein with kelch motifs isoform X1                                           | 0.96 | 1.02 | 0.98 | 1.12 | 6.45E-01 | 5.46E-01 | 7.75E-01 | 6.93E-01 |
| XP_005266964.1 | MTHFD1L  | monofunctional C1-tetrahydrofolate synthase, mitochondrial isoform X1                        | 1.10 | 0.92 | 1.01 | 1.14 | 5.17E-03 | 1.58E-04 | 1.07E-01 | 3.28E-02 |
| NP_002922.2    | RING1    | E3 ubiquitin-protein ligase RING1                                                            | 0.96 | 0.91 | 0.87 | 0.98 | 7.26E-01 | 6.39E-01 | 7.27E-01 | 6.30E-01 |
| XP_024305415.1 | PPP2R5E  | serine/threonine-protein phosphatase 2A 56 kDa regulatory subunit epsilon isoform isoform X1 | 0.99 | 1.02 | 1.02 | 1.01 | 1.19E-01 | 5.20E-02 | 8.58E-01 | 8.02E-01 |
| NP_066018.1    | NCOA5    | nuclear receptor coactivator 5 isoform 1                                                     | 1.02 | 1.01 | 1.03 | 1.08 | 5.95E-01 | 4.88E-01 | 8.30E-01 | 7.62E-01 |
| XP_006721660.1 | MPDU1    | mannose-P-dolichol utilization defect 1 protein isoform X1                                   | 1.09 | 0.85 | 0.92 | 0.95 | 9.04E-02 | 3.41E-02 | 4.87E-02 | 4.54E-03 |
| NP_149975.1    | PIGS     | GPI transamidase component PIG-S                                                             | 1.06 | 0.99 | 1.06 | 1.06 | 1.00E-01 | 4.00E-02 | 1.08E-01 | 3.35E-02 |
| NP_003334.2    | UBE2G2   | ubiquitin-conjugating enzyme E2 G2 isoform 1                                                 | 1.59 | 0.60 | 0.89 | 0.82 | 4.52E-01 | 3.33E-01 | 2.61E-01 | 1.43E-01 |
| XP_016867437.1 | OSBPL3   | oxysterol-binding protein-related protein 3 isoform X4                                       | 1.05 | 0.86 | 0.90 | 1.00 | 8.71E-01 | 8.18E-01 | 4.46E-01 | 3.17E-01 |
| NP_079092.2    | RABEP2   | rab GTPase-binding effector protein 2                                                        | 0.93 | 1.05 | 0.98 | 0.99 | 3.62E-01 | 2.44E-01 | 2.13E-01 | 1.05E-01 |
| NP_0010101.2   | DPYD     | dihydropyrimidine dehydrogenase [NADP(+)] isoform 1                                          | 1.34 | 0.57 | 0.75 | 1.17 | 2.12E-01 | 1.19E-01 | 1.74E-01 | 7.70E-02 |
| NP_001356833.1 | MPST     | 3-mercaptopyruvate sulfurtransferase isoform 2                                               | 1.08 | 1.03 | 1.12 | 1.15 | 1.85E-01 | 9.84E-02 | 4.13E-01 | 2.85E-01 |
| NP_444278.1    | MRPL53   | 39S ribosomal protein L53, mitochondrial                                                     | 0.85 | 1.15 | 0.96 | 0.96 | 2.27E-01 | 1.30E-01 | 1.94E-01 | 9.23E-02 |
| NP_002872.1    | RALB     | ras-related protein Ral-B                                                                    | 1.10 | 0.91 | 1.00 | 1.07 | 6.81E-01 | 5.87E-01 | 4.42E-01 | 3.14E-01 |
| NP_055288.1    | DIMT1    | probable dimethyladenosine transferase isoform 1                                             | 1.20 | 0.81 | 0.92 | 0.79 | 5.56E-01 | 4.44E-01 | 5.01E-01 | 3.75E-01 |
| NP_060357.1    | CZIB     | CXXC motif containing zinc binding protein isoform 1                                         | 1.08 | 0.91 | 0.99 | 1.07 | 1.11E-01 | 4.69E-02 | 6.53E-02 | 1.09E-02 |
| NP_078849.1    | ARMT1    | damage-control phosphatase ARMT1 isoform a                                                   | 1.15 | 0.84 | 0.96 | 1.06 | 8.33E-02 | 3.02E-02 | 6.60E-02 | 1.13E-02 |
| XP_006724166.1 | NUP50    | nuclear pore complex protein Nup50 isoform X1                                                | 1.00 | 1.47 | 1.42 | 1.02 | 9.57E-01 | 9.40E-01 | 6.17E-01 | 5.03E-01 |
| NP_001014433.1 | CUTA     | protein CutA isoform 1                                                                       | 1.14 | 0.85 | 0.97 | 1.11 | 1.56E-01 | 7.71E-02 | 1.45E-01 | 5.71E-02 |
| NP_005680.1    | ABCB6    | ATP-binding cassette sub-family B member 6, mitochondrial isoform 1                          | 0.87 | 1.30 | 1.18 | 0.97 | 5.78E-01 | 4.68E-01 | 4.55E-01 | 3.26E-01 |
| NP_003786.1    | SNX3     | sorting nexin-3 isoform a                                                                    | 0.88 | 1.00 | 0.88 | 1.02 | 1.36E-01 | 6.33E-02 | 1.75E-01 | 7.85E-02 |
| NP_002026.1    | KDSR     | 3-ketodihydroshingosine reductase precursor                                                  | 1.20 | 0.97 | 1.16 | 1.00 | 1.46E-02 | 1.26E-03 | 6.64E-02 | 1.15E-02 |
| NP_005862.1    | SMNDC1   | survival of motor neuron-related-splicing factor 30                                          | 0.77 | 0.95 | 0.74 | 0.78 | 1.21E-01 | 5.30E-02 | 2.30E-01 | 1.17E-01 |
| NP_001127812.1 | PSMG3    | proteasome assembly chaperone 3                                                              | 1.07 | 0.98 | 1.04 | 1.12 | 3.40E-01 | 2.25E-01 | 2.79E-01 | 1.59E-01 |
| NP_005580.1    | ALDH6A1  | methylmalonate-semialdehyde dehydrogenase [acylating], mitochondrial isoform 1 precursor     | 1.06 | 0.95 | 1.01 | 1.16 | 5.03E-01 | 3.86E-01 | 3.79E-01 | 2.50E-01 |
| XP_005259970.1 | MAN2B1   | lysosomal alpha-mannosidase isoform X1                                                       | 0.84 | 1.00 | 0.83 | 1.08 | 1.95E-02 | 2.25E-03 | 7.21E-02 | 1.48E-02 |
| NP_001287894.1 | CSRP2    | cysteine and glycine-rich protein 2                                                          | 1.05 | 1.02 | 1.08 | 1.07 | 5.76E-02 | 1.70E-02 | 3.85E-01 | 2.56E-01 |
| XP_006715930.1 | ZNF800   | zinc finger protein 800 isoform X1                                                           | 0.96 | 1.17 | 1.10 | 0.91 | 8.56E-01 | 7.98E-01 | 5.78E-01 | 4.62E-01 |
| NP_031396.1    | RFC5     | replication factor C subunit 5 isoform 1                                                     | 1.09 | 0.92 | 1.00 | 1.07 | 3.77E-02 | 7.66E-03 | 5.35E-02 | 6.46E-03 |
| XP_016873372.1 | COA4     | cytochrome c oxidase assembly factor 4 homolog, mitochondrial isoform X1                     | 0.66 | 1.16 | 0.76 | 0.83 | 1.09E-01 | 4.56E-02 | 1.11E-01 | 3.48E-02 |
| NP_000479.1    | SERPINC1 | antithrombin-III isoform 1 precursor                                                         | 1.09 | 1.04 | 1.15 | 1.41 | 7.15E-01 | 6.27E-01 | 8.63E-01 | 8.08E-01 |
| NP_003003.3    | SFRP1    | secreted frizzled-related protein 1 precursor                                                | 1.20 | 0.89 | 1.06 | 1.13 | 2.29E-01 | 1.32E-01 | 1.45E-01 | 5.69E-02 |
| NP_001273737.1 | PRRC1    | protein PRRC1 isoform 1                                                                      | 1.01 | 1.03 | 1.04 | 1.09 | 6.44E-01 | 5.45E-01 | 4.94E-01 | 3.68E-01 |
| XP_011537045.1 | VPS37B   | vacuolar protein sorting-associated protein 37B isoform X1                                   | 0.97 | 0.97 | 0.94 | 1.07 | 8.43E-01 | 7.81E-01 | 9.84E-01 | 9.77E-01 |
| NP_001073592.1 | PRNP     | major prion protein Prp precursor                                                            | 0.83 | 0.91 | 0.75 | 0.94 | 3.27E-02 | 5.84E-03 | 1.04E-01 | 3.13E-02 |
| XP_024302038.1 | ZFYVE16  | zinc finger FYVE domain-containing protein 16 isoform X1                                     | 0.88 | 1.02 | 0.90 | 1.01 | 7.94E-02 | 2.77E-02 | 2.55E-01 | 1.38E-01 |

|                |           |                                                                                   |      |      |      |      |          |          |          |          |
|----------------|-----------|-----------------------------------------------------------------------------------|------|------|------|------|----------|----------|----------|----------|
| NP_001181.2    | BCAT2     | branched-chain-amino-acid aminotransferase, mitochondrial isoform a precursor     | 0.91 | 1.25 | 1.15 | 1.01 | 4.99E-01 | 3.82E-01 | 2.41E-01 | 1.27E-01 |
| NP_056284.1    | NIPSNAP3A | protein NipSnap homolog 3A isoform 1                                              | 1.10 | 1.29 | 1.42 | 1.05 | 1.61E-03 | 1.75E-05 | 7.94E-01 | 7.18E-01 |
| NP_076424.1    | DDR GK1   | DDR GK domain-containing protein 1                                                | 1.21 | 1.07 | 1.30 | 1.18 | 4.79E-01 | 3.62E-01 | 6.47E-01 | 5.37E-01 |
| NP_001341706.1 | CASP3     | caspase-3 isoform a                                                               | 0.90 | 1.06 | 0.95 | 0.99 | 1.11E-01 | 4.70E-02 | 1.52E-01 | 6.17E-02 |
| XP_011518702.1 | FAR1      | fatty acyl-CoA reductase 1 isoform X1                                             | 1.17 | 0.89 | 1.03 | 1.21 | 1.64E-01 | 8.30E-02 | 3.13E-01 | 1.89E-01 |
| XP_024303163.1 | WDR5      | WD repeat-containing protein 5 isoform X1                                         | 1.09 | 0.92 | 1.00 | 0.99 | 1.38E-01 | 6.43E-02 | 1.27E-01 | 4.48E-02 |
| NP_057030.3    | PELO      | protein pelota homolog                                                            | 1.05 | 0.99 | 1.04 | 1.07 | 3.12E-01 | 2.01E-01 | 2.90E-01 | 1.70E-01 |
| XP_024307296.1 | NOSIP     | nitric oxide synthase-interacting protein isoform X1                              | 0.89 | 0.93 | 0.83 | 0.89 | 1.96E-01 | 1.06E-01 | 4.86E-01 | 3.59E-01 |
| XP_011512864.1 | HLA-DRB5  | major histocompatibility complex, class II, DR beta 5 isoform X1                  | 0.90 | 1.04 | 0.94 | 1.06 | 7.69E-02 | 2.66E-02 | 9.22E-02 | 2.55E-02 |
| NP_001304653.1 | NOL7      | nucleolar protein 7                                                               | 0.90 | 1.01 | 0.91 | 0.99 | 2.54E-01 | 1.52E-01 | 2.38E-01 | 1.25E-01 |
| NP_071505.2    | TIA1      | nucleolysin TIA-1 isoform p40 isoform 2                                           | 1.07 | 0.96 | 1.03 | 1.03 | 1.08E-01 | 4.48E-02 | 1.46E-01 | 5.79E-02 |
| XP_024306443.1 | CLUH      | clustered mitochondria protein homolog isoform X1                                 | 1.10 | 0.92 | 1.01 | 1.04 | 3.81E-01 | 2.62E-01 | 2.83E-01 | 1.62E-01 |
| NP_689850.2    | METTL7B   | methyltransferase-like protein 7B precursor                                       | 1.05 | 1.04 | 1.09 | 1.07 | 3.07E-01 | 1.96E-01 | 7.45E-01 | 6.56E-01 |
| NP_003809.1    | CDS2      | phosphatidate cytidylyltransferase 2                                              | 1.15 | 1.10 | 1.27 | 1.11 | 3.90E-02 | 8.30E-03 | 6.48E-01 | 5.40E-01 |
| NP_005253.3    | GFER      | FAD-linked sulphydryl oxidase ALR                                                 | 1.28 | 1.00 | 1.30 | 1.42 | 2.73E-01 | 1.70E-01 | 4.11E-01 | 2.82E-01 |
| NP_001317137.1 | USP47     | ubiquitin carboxyl-terminal hydrolase 47 isoform c                                | 1.06 | 1.01 | 1.07 | 1.10 | 3.21E-01 | 2.09E-01 | 4.11E-01 | 2.83E-01 |
| XP_016862215.1 | PBRM1     | protein polybromo-1 isoform X1                                                    | 0.94 | 0.98 | 0.92 | 0.87 | 2.92E-01 | 1.84E-01 | 4.47E-01 | 3.18E-01 |
| NP_061910.1    | EXOSC4    | exosome complex component RRP41                                                   | 3.00 | 0.44 | 1.12 | 1.06 | 2.69E-01 | 1.65E-01 | 1.89E-01 | 8.87E-02 |
| NP_001335.1    | DAD1      | dolichyl-diphosphooligosaccharide--protein glycosyltransferase subunit DAD1       | 1.14 | 0.81 | 0.92 | 1.01 | 1.34E-01 | 6.19E-02 | 6.20E-02 | 9.84E-03 |
| XP_005271043.1 | BSDC1     | BSD domain-containing protein 1 isoform X2                                        | 0.91 | 1.07 | 0.98 | 0.95 | 5.70E-02 | 1.66E-02 | 9.94E-02 | 2.90E-02 |
| XP_006717584.1 | NRP1      | neuropilin-1 isoform X1                                                           | 1.13 | 0.82 | 0.93 | 1.09 | 6.77E-01 | 5.82E-01 | 3.43E-01 | 2.16E-01 |
| NP_055332.3    | UBP1      | upstream-binding protein 1 isoform LBP-1b                                         | 1.69 | 0.81 | 1.41 | 1.76 | 2.84E-01 | 1.78E-01 | 2.33E-01 | 1.20E-01 |
| NP_001030312.2 | SRA1      | steroid receptor RNA activator 1 isoform 1                                        | 0.96 | 1.07 | 1.03 | 0.94 | 5.45E-01 | 4.31E-01 | 5.15E-01 | 3.91E-01 |
| NP_001262.3    | CHD2      | chromodomain-helicase-DNA-binding protein 2 isoform 1                             | 1.06 | 1.07 | 1.13 | 1.12 | 6.58E-02 | 2.08E-02 | 7.14E-01 | 6.16E-01 |
| NP_060640.2    | RPRD1A    | regulation of nuclear pre-mRNA domain-containing protein 1A isoform 1             | 0.93 | 0.98 | 0.91 | 1.08 | 3.68E-01 | 2.51E-01 | 6.07E-01 | 4.93E-01 |
| NP_060501.4    | WDR6      | WD repeat-containing protein 6 isoform 1                                          | 1.02 | 1.00 | 1.03 | 1.00 | 8.82E-01 | 8.36E-01 | 9.20E-01 | 8.85E-01 |
| NP_071926.4    | ARAP3     | arf-GAP with Rho-GAP domain, ANK repeat and PH domain-containing protein 3        | 1.07 | 0.94 | 1.01 | 1.05 | 3.89E-02 | 8.19E-03 | 7.73E-02 | 1.65E-02 |
| NP_061924.1    | MRPL50    | 39S ribosomal protein L50, mitochondrial                                          | 0.88 | 1.02 | 0.89 | 1.09 | 1.23E-01 | 5.50E-02 | 1.36E-01 | 5.06E-02 |
| NP_001304040.1 | MOB1A     | MOB kinase activator 1A isoform 3                                                 | 1.09 | 0.95 | 1.03 | 1.03 | 4.32E-02 | 9.95E-03 | 5.79E-02 | 8.21E-03 |
| NP_001032238.1 | ACOT1     | acyl-coenzyme A thioesterase 1                                                    | 1.27 | 0.77 | 0.96 | 1.13 | 3.45E-01 | 2.29E-01 | 2.48E-01 | 1.32E-01 |
| NP_001230903.1 | PPP3CC    | serine/threonine-protein phosphatase 2B catalytic subunit gamma isoform isoform 1 | 1.19 | 0.86 | 1.01 | 1.01 | 1.87E-01 | 1.00E-01 | 1.57E-01 | 6.52E-02 |
| NP_001121631.1 | VPS53     | vacuolar protein sorting-associated protein 53 homolog isoform 1                  | 1.00 | 0.97 | 0.97 | 1.01 | 9.80E-01 | 9.71E-01 | 8.27E-01 | 7.57E-01 |
| XP_011509125.1 | RAB3GAP1  | rab3 GTPase-activating protein catalytic subunit isoform X1                       | 1.06 | 0.93 | 0.98 | 1.05 | 6.75E-01 | 5.79E-01 | 5.50E-01 | 4.28E-01 |
| NP_004026.2    | ACOX1     | peroxisomal acyl-coenzyme A oxidase 1 isoform a                                   | 1.08 | 1.11 | 1.21 | 1.05 | 2.25E-01 | 1.28E-01 | 9.14E-01 | 8.74E-01 |
| NP_057731.1    | THEM6     | protein THEM6 isoform 1                                                           | 1.05 | 0.98 | 1.03 | 1.15 | 3.55E-01 | 2.38E-01 | 2.66E-01 | 1.47E-01 |
| XP_024306434.1 | FLOT2     | flotillin-2 isoform X1                                                            | 1.03 | 0.79 | 0.82 | 0.95 | 1.06E-02 | 6.23E-04 | 9.83E-02 | 2.84E-02 |
| NP_001013416.1 | IGFBP3    | insulin-like growth factor-binding protein 3 isoform a precursor                  | 1.59 | 1.08 | 1.72 | 1.21 | 8.06E-02 | 2.87E-02 | 1.22E-01 | 4.22E-02 |
| NP_006315.1    | CFDP1     | craniofacial development protein 1                                                | 0.72 | 1.12 | 0.81 | 0.88 | 4.37E-02 | 1.01E-02 | 5.17E-02 | 5.60E-03 |
| NP_112236.3    | SHARPIN   | sharpin                                                                           | 1.07 | 1.15 | 1.22 | 1.12 | 8.91E-02 | 3.36E-02 | 5.41E-01 | 4.20E-01 |
| NP_808817.1    | ARMCX3    | armadillo repeat-containing X-linked protein 3                                    | 0.99 | 0.99 | 0.99 | 1.02 | 4.49E-01 | 3.30E-01 | 9.84E-01 | 9.77E-01 |
| NP_057058.2    | CRYL1     | lambda-crystallin homolog isoform 1                                               | 1.10 | 0.90 | 0.98 | 1.01 | 1.21E-01 | 5.29E-02 | 1.26E-01 | 4.43E-02 |
| NP_078799.2    | GCC1      | GRIP and coiled-coil domain-containing protein 1                                  | 1.21 | 1.26 | 1.52 | 1.25 | 1.28E-01 | 5.82E-02 | 6.41E-01 | 5.31E-01 |
| NP_001350467.1 | TCAF2     | TRPM8 channel-associated factor 2 isoform C                                       | 0.93 | 1.05 | 0.97 | 1.02 | 5.17E-02 | 1.41E-02 | 3.42E-01 | 2.15E-01 |
| NP_060829.2    | UFSP2     | ufm1-specific protease 2                                                          | 1.29 | 0.88 | 1.09 | 1.22 | 3.67E-01 | 2.49E-01 | 4.05E-01 | 2.75E-01 |
| NP_004230.2    | TRIP11    | thyroid receptor-interacting protein 11 isoform 1                                 | 0.92 | 1.11 | 1.01 | 0.99 | 5.58E-01 | 4.46E-01 | 4.53E-01 | 3.25E-01 |
| XP_005257516.1 | ATP6VOA1  | V-type proton ATPase 116 kDa subunit a isoform X1                                 | 1.08 | 1.01 | 1.10 | 1.05 | 2.21E-01 | 1.25E-01 | 3.93E-01 | 2.64E-01 |
| NP_001307539.1 | CHCHD6    | MICOS complex subunit MIC25 isoform 1                                             | 0.97 | 1.08 | 1.05 | 1.16 | 6.43E-01 | 5.44E-01 | 2.38E-01 | 1.25E-01 |

|                |                 |                                                                                       |      |      |      |      |          |          |          |          |
|----------------|-----------------|---------------------------------------------------------------------------------------|------|------|------|------|----------|----------|----------|----------|
| NP_001284519.1 | CD3EAP          | DNA-directed RNA polymerase I subunit RPA34 isoform 1                                 | 0.85 | 1.00 | 0.86 | 0.96 | 2.10E-01 | 1.17E-01 | 2.27E-01 | 1.15E-01 |
| NP_068805.1    | LAMTOR3         | regulator complex protein LAMTOR3 isoform 1                                           | 0.95 | 0.95 | 0.88 | 1.01 | 7.97E-01 | 7.26E-01 | 9.92E-01 | 9.86E-01 |
| NP_940888.3    | RPL7L1          | 60S ribosomal protein L7-like 1                                                       | 1.03 | 1.05 | 1.09 | 1.09 | 6.56E-01 | 5.58E-01 | 8.83E-01 | 8.34E-01 |
| XP_016856574.1 | GSTM4           | glutathione S-transferase Mu 4 isoform X1                                             | 1.04 | 0.92 | 0.95 | 1.06 | 9.33E-02 | 3.56E-02 | 1.68E-01 | 7.29E-02 |
| NP_079094.1    | UBA5            | ubiquitin-like modifier-activating enzyme 5 isoform 1                                 | 0.98 | 1.09 | 1.07 | 0.90 | 7.36E-01 | 6.51E-01 | 3.12E-01 | 1.88E-01 |
| NP_071739.2    | C17orf75        | protein Njmu-R1                                                                       | 1.34 | 0.85 | 1.14 | 1.07 | 1.65E-01 | 8.36E-02 | 1.26E-01 | 4.41E-02 |
| NP_001352550.1 | DLGAP4          | disks large-associated protein 4 isoform d                                            | 1.10 | 0.83 | 0.92 | 1.05 | 2.84E-02 | 4.43E-03 | 1.14E-01 | 3.67E-02 |
| NP_065741.3    | ANKHD1-EIF4EBP3 | ANKHD1-EIF4EBP3 protein                                                               | 1.02 | 1.43 | 1.40 | 1.27 | 9.47E-01 | 9.25E-01 | 6.09E-01 | 4.95E-01 |
| NP_001116827.1 | PPP6C           | serine/threonine-protein phosphatase 6 catalytic subunit isoform a                    | 1.26 | 0.82 | 0.98 | 1.03 | 5.36E-01 | 4.21E-01 | 4.16E-01 | 2.88E-01 |
| XP_005251773.1 | CTSL            | cathepsin L1 isoform X1                                                               | 0.74 | 1.16 | 0.85 | 1.09 | 3.54E-02 | 6.79E-03 | 5.37E-02 | 6.68E-03 |
| NP_113640.1    | RAMAC           | RNA guanine-N7 methyltransferase activating subunit                                   | 0.91 | 0.96 | 0.87 | 1.00 | 2.62E-01 | 1.59E-01 | 5.34E-01 | 4.11E-01 |
| NP_001123543.1 | EPN1            | epsin-1 isoform a                                                                     | 1.00 | 1.00 | 1.00 | 1.07 | 9.42E-01 | 9.17E-01 | 9.54E-01 | 9.33E-01 |
| XP_006720310.1 | VRK1            | serine/threonine-protein kinase VRK1 isoform X2                                       | 1.04 | 0.97 | 1.01 | 0.99 | 1.71E-01 | 8.77E-02 | 1.08E-01 | 3.37E-02 |
| NP_005504.2    | GTF2E1          | general transcription factor IIE subunit 1                                            | 0.88 | 1.00 | 0.88 | 1.05 | 3.11E-01 | 2.00E-01 | 3.93E-01 | 2.64E-01 |
| NP_115867.2    | MRPL38          | 39S ribosomal protein L38, mitochondrial precursor                                    | 1.04 | 0.96 | 0.99 | 1.10 | 1.32E-01 | 6.02E-02 | 2.12E-01 | 1.04E-01 |
| NP_001186752.1 | NEDD8-MDP1      | NEDD8-MDP1 protein                                                                    | 1.01 | 0.94 | 0.95 | 0.96 | 8.80E-01 | 8.31E-01 | 3.97E-01 | 2.68E-01 |
| NP_001129498.1 | SEC13           | protein SEC13 homolog isoform 3                                                       | 1.12 | 0.89 | 0.99 | 1.13 | 3.09E-01 | 1.98E-01 | 2.90E-01 | 1.69E-01 |
| NP_060417.4    | MOCOS           | molybdenum cofactor sulfurase                                                         | 1.23 | 0.93 | 1.14 | 1.12 | 5.06E-02 | 1.33E-02 | 9.03E-02 | 2.40E-02 |
| NP_060281.2    | UBE2R2          | ubiquitin-conjugating enzyme E2 R2                                                    | 0.89 | 1.02 | 0.91 | 1.02 | 1.71E-02 | 1.81E-03 | 4.67E-02 | 4.00E-03 |
| NP_001186548.1 | NCOA7           | nuclear receptor coactivator 7 isoform 1                                              | 0.83 | 1.09 | 0.91 | 0.97 | 1.69E-01 | 8.66E-02 | 1.32E-01 | 4.84E-02 |
| NP_001091981.1 | KIF2A           | kinesin-like protein KIF2A isoform 2                                                  | 1.11 | 0.97 | 1.08 | 1.09 | 1.31E-01 | 5.98E-02 | 1.22E-01 | 4.20E-02 |
| NP_054765.1    | MRPS18B         | 28S ribosomal protein S18b, mitochondrial                                             | 1.15 | 0.86 | 0.99 | 1.14 | 8.70E-02 | 3.23E-02 | 8.50E-02 | 2.10E-02 |
| NP_005345.3    | JUND            | transcription factor jun-D isoform JunD-FL                                            | 0.82 | 0.95 | 0.78 | 0.96 | 6.28E-01 | 5.23E-01 | 6.97E-01 | 5.95E-01 |
| NP_714916.3    | POGLUT3         | protein O-glucosyltransferase 3 isoform 1 precursor                                   | 0.97 | 1.02 | 0.99 | 0.93 | 8.59E-01 | 8.02E-01 | 7.99E-01 | 7.24E-01 |
| NP_066012.1    | METTL14         | N6-adenosine-methyltransferase non-catalytic subunit                                  | 1.11 | 0.94 | 1.04 | 1.11 | 2.30E-01 | 1.33E-01 | 1.96E-01 | 9.39E-02 |
| NP_061929.2    | NDUFB11         | NADH dehydrogenase [ubiquinone] 1 beta subcomplex subunit 11, mitochondrial isoform 1 | 1.13 | 0.93 | 1.05 | 1.10 | 1.76E-02 | 1.87E-03 | 5.11E-02 | 5.39E-03 |
| NP_002755.1    | PRPS1           | ribose-phosphate pyrophosphokinase 1 isoform 1                                        | 1.04 | 1.06 | 1.11 | 0.97 | 4.19E-01 | 2.99E-01 | 7.29E-01 | 6.34E-01 |
| NP_444283.2    | THEM4           | acyl-coenzyme A thioesterase THEM4                                                    | 1.02 | 0.87 | 0.88 | 1.11 | 9.29E-01 | 8.97E-01 | 4.07E-01 | 2.78E-01 |
| NP_000475.1    | APP             | amyloid-beta precursor protein isoform a precursor                                    | 0.97 | 0.93 | 0.90 | 1.09 | 6.98E-01 | 6.08E-01 | 6.74E-01 | 5.70E-01 |
| NP_835361.1    | SLC35B2         | adenosine 3'-phospho 5'-phosphosulfate transporter 1 isoform a precursor              | 0.91 | 0.99 | 0.90 | 1.04 | 4.15E-01 | 2.94E-01 | 5.01E-01 | 3.76E-01 |
| NP_002638.2    | PK3C3           | phosphatidylinositol 3-kinase catalytic subunit type 3 isoform 1                      | 1.08 | 0.89 | 0.96 | 1.12 | 2.83E-01 | 1.77E-01 | 3.13E-01 | 1.90E-01 |
| NP_003767.2    | MRPL40          | 39S ribosomal protein L40, mitochondrial isoform 1                                    | 0.97 | 0.94 | 0.91 | 1.11 | 2.68E-01 | 1.64E-01 | 7.63E-01 | 6.79E-01 |
| NP_002204.2    | ITGB5           | integrin beta-5 isoform a precursor                                                   | 0.82 | 0.89 | 0.73 | 0.98 | 1.41E-01 | 6.69E-02 | 4.06E-01 | 2.76E-01 |
| XP_016856104.1 | EPS15           | epidermal growth factor receptor substrate 15 isoform X1                              | 0.90 | 1.00 | 0.90 | 1.08 | 1.78E-01 | 9.29E-02 | 3.16E-01 | 1.92E-01 |
| NP_001265552.1 | NFXL1           | NF-X1-type zinc finger protein NFXL1                                                  | 0.72 | 1.12 | 0.81 | 0.98 | 7.58E-02 | 2.61E-02 | 7.23E-02 | 1.48E-02 |
| NP_005566.2    | LNPEP           | leucyl-cystinyl aminopeptidase isoform 1                                              | 1.09 | 1.15 | 1.26 | 0.97 | 6.00E-01 | 4.94E-01 | 7.27E-01 | 6.31E-01 |
| NP_055318.2    | UTP20           | small subunit processome component 20 homolog                                         | 0.96 | 1.12 | 1.07 | 1.02 | 1.71E-01 | 8.81E-02 | 5.97E-02 | 8.94E-03 |
| NP_001186127.1 | TBC1D23         | TBC1 domain family member 23 isoform 1                                                | 1.37 | 0.79 | 1.08 | 1.09 | 1.26E-01 | 5.69E-02 | 1.02E-01 | 3.05E-02 |
| NP_008941.3    | DDX52           | probable ATP-dependent RNA helicase DDX52 isoform 1                                   | 0.93 | 1.05 | 0.97 | 0.90 | 1.21E-01 | 5.35E-02 | 2.60E-01 | 1.42E-01 |
| NP_003163.1    | SURF1           | surfeit locus protein 1 isoform 1                                                     | 1.06 | 1.03 | 1.09 | 1.10 | 3.94E-01 | 2.74E-01 | 6.43E-01 | 5.33E-01 |
| NP_001265874.1 | PBK             | lymphokine-activated killer T-cell-originated protein kinase isoform 2                | 1.13 | 1.04 | 1.17 | 1.06 | 1.02E-02 | 5.49E-04 | 2.85E-01 | 1.64E-01 |
| NP_003756.1    | STX10           | syntaxin-10 isoform 1                                                                 | 0.79 | 1.13 | 0.88 | 0.89 | 3.53E-01 | 2.37E-01 | 2.85E-01 | 1.64E-01 |
| NP_689794.1    | MOSPD2          | motile sperm domain-containing protein 2 isoform 1                                    | 1.10 | 1.05 | 1.15 | 1.05 | 1.03E-01 | 4.15E-02 | 7.40E-01 | 6.50E-01 |
| NP_068818.4    | HLA-DRB4        | major histocompatibility complex, class II, DR beta 4 precursor                       | 0.88 | 0.98 | 0.86 | 0.98 | 2.36E-01 | 1.38E-01 | 4.93E-01 | 3.68E-01 |
| NP_659477.2    | CAVIN3          | caveolae-associated protein 3                                                         | 1.05 | 0.95 | 0.98 | 0.99 | 7.85E-01 | 7.10E-01 | 5.80E-01 | 4.63E-01 |
| NP_001244318.1 | CD63            | CD63 antigen isoform A                                                                | 0.86 | 1.36 | 1.16 | 1.35 | 8.10E-02 | 2.91E-02 | 4.48E-02 | 3.49E-03 |

|                |              |                                                                                                    |      |      |      |      |          |          |          |          |
|----------------|--------------|----------------------------------------------------------------------------------------------------|------|------|------|------|----------|----------|----------|----------|
| NP_036585.1    | TBL2         | transducin beta-like protein 2 isoform 1 precursor                                                 | 1.44 | 0.85 | 1.20 | 1.25 | 2.67E-01 | 1.64E-01 | 2.23E-01 | 1.13E-01 |
| NP_001357331.1 | BAZ1B        | tyrosine-protein kinase BAZ1B                                                                      | 1.02 | 0.93 | 0.95 | 1.09 | 5.78E-02 | 1.70E-02 | 5.97E-02 | 8.93E-03 |
| NP_777573.1    | NOP9         | nucleolar protein 9 isoform 1                                                                      | 1.01 | 1.01 | 1.01 | 1.02 | 8.48E-01 | 7.89E-01 | 9.95E-01 | 9.94E-01 |
| XP_011532899.1 | ERGIC1       | endoplasmic reticulum-Golgi intermediate compartment protein 1 isoform X1                          | 0.93 | 0.98 | 0.91 | 0.88 | 4.31E-01 | 3.10E-01 | 6.81E-01 | 5.77E-01 |
| NP_003740.2    | IRS2         | insulin receptor substrate 2                                                                       | 1.07 | 1.04 | 1.11 | 0.99 | 4.61E-01 | 3.42E-01 | 7.53E-01 | 6.66E-01 |
| XP_011511842.1 | ZFYVE28      | lateral signaling target protein 2 homolog isoform X6                                              | 0.97 | 0.95 | 0.92 | 1.19 | 6.95E-01 | 6.04E-01 | 9.01E-01 | 8.58E-01 |
| NP_078867.2    | CHMP6        | charged multivesicular body protein 6                                                              | 1.09 | 0.86 | 0.93 | 1.14 | 4.74E-01 | 3.56E-01 | 3.30E-01 | 2.05E-01 |
| XP_011532575.1 | DCAF1        | DDB1- and CUL4-associated factor 1 isoform X1                                                      | 1.23 | 0.88 | 1.01 | 1.15 | 6.73E-01 | 5.76E-01 | 5.83E-01 | 4.67E-01 |
| NP_066976.1    | CDH19        | cadherin-19 isoform 1                                                                              | 0.86 | 1.03 | 0.89 | 1.12 | 4.39E-01 | 3.19E-01 | 3.84E-01 | 2.55E-01 |
| NP_001123484.1 | SLC9A3R2     | Na(+)/H(+) exchange regulatory cofactor NHE-RF2 isoform a                                          | 0.89 | 0.99 | 0.88 | 1.01 | 3.38E-03 | 7.54E-05 | 5.00E-02 | 4.86E-03 |
| NP_060367.1    | OXSM         | 3-oxoacyl-[acyl-carrier-protein] synthase, mitochondrial isoform 1 precursor                       | 1.09 | 0.99 | 1.08 | 1.15 | 7.41E-02 | 2.49E-02 | 8.65E-02 | 2.19E-02 |
| NP_001124296.1 | SUPT5H       | transcription elongation factor SPT5 isoform a                                                     | 1.02 | 0.96 | 0.98 | 1.01 | 1.44E-01 | 6.88E-02 | 5.95E-02 | 8.76E-03 |
| NP_003084.1    | SNRPC        | U1 small nuclear ribonucleoprotein C                                                               | 1.09 | 0.81 | 0.88 | 1.05 | 2.90E-02 | 4.66E-03 | 6.35E-02 | 1.03E-02 |
| NP_061888.1    | CHPF2        | chondroitin sulfate glucuronyltransferase isoform 1 precursor                                      | 1.03 | 0.99 | 1.02 | 1.07 | 7.77E-01 | 7.00E-01 | 8.28E-01 | 7.59E-01 |
| NP_003950.1    | HIP1R        | huntingtin-interacting protein 1-related protein isoform 1                                         | 0.97 | 1.03 | 0.99 | 1.09 | 5.09E-01 | 3.93E-01 | 5.25E-01 | 4.02E-01 |
| NP_002881.1    | RASA1        | ras GTPase-activating protein 1 isoform 1                                                          | 1.02 | 1.04 | 1.06 | 1.03 | 9.19E-01 | 8.82E-01 | 8.96E-01 | 8.49E-01 |
| NP_006313.1    | TUBGCP3      | gamma-tubulin complex component 3 isoform 1                                                        | 1.07 | 0.97 | 1.04 | 0.98 | 4.15E-01 | 2.95E-01 | 3.05E-01 | 1.81E-01 |
| NP_057513.1    | COPZ2        | coatamer subunit zeta-2                                                                            | 0.96 | 0.94 | 0.90 | 1.03 | 1.12E-01 | 4.76E-02 | 4.57E-01 | 3.29E-01 |
| NP_001347481.1 | PABPN1       | polyadenylate-binding protein 2 isoform 3                                                          | 0.87 | 1.03 | 0.90 | 0.89 | 2.02E-01 | 1.11E-01 | 1.89E-01 | 8.84E-02 |
| XP_016869602.1 | WASHC5       | WASH complex subunit 5 isoform X1                                                                  | 0.95 | 0.96 | 0.90 | 0.98 | 6.60E-01 | 5.63E-01 | 9.86E-01 | 9.80E-01 |
| NP_079426.2    | TARS2        | threonine--tRNA ligase, mitochondrial isoform a                                                    | 1.02 | 0.96 | 0.97 | 0.98 | 9.09E-01 | 8.69E-01 | 8.03E-01 | 7.29E-01 |
| NP_115881.3    | JAGN1        | protein jagunal homolog 1 isoform a                                                                | 1.00 | 1.02 | 1.02 | 1.10 | 9.87E-01 | 9.82E-01 | 7.85E-01 | 7.05E-01 |
| NP_001252510.1 | TTI2         | TELO2-interacting protein 2 isoform 1                                                              | 1.08 | 0.97 | 1.04 | 1.05 | 1.63E-01 | 8.21E-02 | 2.12E-01 | 1.04E-01 |
| XP_016857295.1 | CTTNBP2NL    | CTTNBP2 N-terminal-like protein isoform X1                                                         | 1.15 | 0.88 | 1.01 | 1.19 | 3.27E-02 | 5.80E-03 | 5.97E-02 | 8.84E-03 |
| XP_005268284.1 | CDC42BPB     | serine/threonine-protein kinase MRCK beta isoform X1                                               | 1.05 | 0.99 | 1.03 | 1.06 | 6.91E-01 | 5.98E-01 | 7.20E-01 | 6.23E-01 |
| NP_055568.3    | BMS1         | ribosome biogenesis protein BMS1 homolog                                                           | 0.98 | 0.99 | 0.97 | 1.11 | 8.31E-01 | 7.66E-01 | 9.22E-01 | 8.88E-01 |
| NP_008910.2    | SLC39A7      | zinc transporter SLC39A7 isoform 1 precursor                                                       | 1.20 | 1.05 | 1.26 | 1.07 | 1.26E-01 | 5.70E-02 | 2.54E-01 | 1.37E-01 |
| NP_006828.2    | COP5         | COP9 signalosome complex subunit 5                                                                 | 1.07 | 0.97 | 1.04 | 1.08 | 8.42E-02 | 3.06E-02 | 8.90E-02 | 2.34E-02 |
| XP_011543887.1 | APOO         | MICOS complex subunit MIC26 isoform X1                                                             | 1.00 | 1.00 | 1.00 | 0.99 | 9.79E-01 | 9.68E-01 | 9.12E-01 | 8.73E-01 |
| NP_001014839.1 | NCN          | neurochondrin isoform 1                                                                            | 0.94 | 1.01 | 0.95 | 1.15 | 1.77E-01 | 9.22E-02 | 2.88E-01 | 1.67E-01 |
| NP_061846.2    | DPM3         | dolichol-phosphate mannosyltransferase subunit 3 isoform 1                                         | 1.05 | 1.05 | 1.10 | 0.97 | 1.49E-01 | 7.22E-02 | 9.57E-01 | 9.38E-01 |
| NP_079239.3    | FBXL18       | F-box/LRR-repeat protein 18 isoform 2                                                              | 1.41 | 0.68 | 0.91 | 0.79 | 6.00E-01 | 4.94E-01 | 3.47E-01 | 2.19E-01 |
| NP_997263.2    | CCDC9B       | coiled-coil domain-containing protein 9B                                                           | 1.02 | 0.91 | 0.93 | 1.11 | 7.19E-01 | 6.32E-01 | 4.37E-01 | 3.08E-01 |
| XP_005264881.1 | USP19        | ubiquitin carboxyl-terminal hydrolase 19 isoform X1                                                | 1.00 | 0.95 | 0.94 | 1.09 | 9.91E-01 | 9.88E-01 | 8.02E-01 | 7.28E-01 |
| NP_057124.3    | TMED5        | transmembrane emp24 domain-containing protein 5 isoform 1 precursor                                | 1.01 | 0.97 | 0.98 | 1.09 | 7.89E-01 | 7.14E-01 | 4.37E-01 | 3.09E-01 |
| NP_057665.2    | ECSIT        | evolutionarily conserved signaling intermediate in Toll pathway, mitochondrial isoform 1 precursor | 0.86 | 1.18 | 1.01 | 0.94 | 1.96E-01 | 1.07E-01 | 1.34E-01 | 4.97E-02 |
| NP_001350779.1 | SPG7         | paraplegin isoform 3                                                                               | 1.05 | 0.84 | 0.88 | 1.12 | 2.77E-01 | 1.73E-01 | 3.93E-01 | 2.64E-01 |
| NP_061895.3    | TMX3         | protein disulfide-isomerase TMX3 isoform 1 precursor                                               | 0.93 | 1.09 | 1.01 | 0.94 | 2.46E-01 | 1.45E-01 | 1.28E-01 | 4.59E-02 |
| XP_016856233.1 | POGZ         | pogo transposable element with ZNF domain isoform X1                                               | 0.99 | 0.96 | 0.95 | 1.03 | 7.94E-01 | 7.21E-01 | 7.31E-01 | 6.38E-01 |
| NP_694822.2    | RIOX2        | ribosomal oxygenase 2 isoform a                                                                    | 0.90 | 1.10 | 0.99 | 1.09 | 1.58E-01 | 7.90E-02 | 9.02E-02 | 2.39E-02 |
| NP_005605.1    | RHEB         | GTP-binding protein Rheb                                                                           | 1.08 | 1.04 | 1.13 | 1.06 | 9.86E-02 | 3.87E-02 | 4.92E-01 | 3.66E-01 |
| NP_036569.1    | SNAPIN       | SNARE-associated protein Snapin                                                                    | 0.87 | 1.18 | 1.01 | 1.01 | 4.08E-01 | 2.88E-01 | 2.52E-01 | 1.36E-01 |
| NP_996667.2    | ECI2         | enoyl-CoA delta isomerase 2, mitochondrial isoform 2                                               | 0.93 | 1.06 | 0.99 | 1.03 | 3.29E-01 | 2.15E-01 | 2.34E-01 | 1.21E-01 |
| NP_001269580.1 | SLC35A2      | UDP-galactose translocator isoform h                                                               | 0.93 | 1.06 | 0.98 | 1.14 | 4.15E-01 | 2.94E-01 | 2.50E-01 | 1.34E-01 |
| NP_001185808.1 | ATP5MF-PTCD1 | ATP5J2-PTCD1 fusion protein                                                                        | 1.00 | 0.99 | 0.99 | 1.00 | 9.57E-01 | 9.39E-01 | 8.50E-01 | 7.90E-01 |
| NP_001352564.1 | TASOR        | protein TASOR isoform d                                                                            | 0.91 | 1.13 | 1.02 | 1.22 | 1.21E-02 | 8.37E-04 | 3.51E-01 | 2.24E-01 |

|                |            |                                                                                   |      |      |      |      |          |          |          |          |
|----------------|------------|-----------------------------------------------------------------------------------|------|------|------|------|----------|----------|----------|----------|
| NP_003918.1    | MBD2       | methyl-CpG-binding domain protein 2 isoform 1                                     | 0.98 | 0.94 | 0.92 | 1.01 | 4.21E-01 | 3.01E-01 | 2.03E-01 | 9.83E-02 |
| XP_011526907.1 | LSM14B     | protein LSM14 homolog B isoform X1                                                | 1.05 | 0.89 | 0.94 | 1.12 | 6.73E-01 | 5.77E-01 | 3.54E-01 | 2.26E-01 |
| NP_057291.1    | CPSF3      | cleavage and polyadenylation specificity factor subunit 3 isoform a               | 1.05 | 0.99 | 1.03 | 0.99 | 9.11E-02 | 3.44E-02 | 9.04E-02 | 2.43E-02 |
| NP_115649.1    | TMEM126A   | transmembrane protein 126A isoform 1                                              | 1.00 | 1.48 | 1.45 | 1.08 | 9.52E-01 | 9.32E-01 | 3.95E-01 | 2.66E-01 |
| NP_079498.2    | WDR82      | WD repeat-containing protein 82                                                   | 1.07 | 0.99 | 1.06 | 1.05 | 2.36E-01 | 1.37E-01 | 2.63E-01 | 1.45E-01 |
| XP_011523628.1 | PIP4K2B    | phosphatidylinositol 5-phosphate 4-kinase type-2 beta isoform X1                  | 1.49 | 0.81 | 1.16 | 1.30 | 2.24E-01 | 1.28E-01 | 3.15E-01 | 1.91E-01 |
| NP_001278433.1 | PPP1R2     | protein phosphatase inhibitor 2 isoform 1                                         | 0.90 | 1.06 | 0.95 | 1.00 | 7.55E-02 | 2.60E-02 | 7.73E-02 | 1.65E-02 |
| NP_001307585.1 | PCID2      | PCI domain-containing protein 2 isoform 2                                         | 1.11 | 0.92 | 1.02 | 1.14 | 3.25E-01 | 2.12E-01 | 2.63E-01 | 1.45E-01 |
| NP_060680.2    | NAXD       | ATP-dependent (S)-NAD(P)H-hydrate dehydratase isoform a                           | 1.07 | 0.93 | 0.99 | 1.13 | 6.78E-02 | 2.18E-02 | 2.15E-01 | 1.06E-01 |
| NP_001032249.1 | PXYLP1     | 2-phosphoxylose phosphatase 1 isoform 1                                           | 1.00 | 1.00 | 1.00 | 1.04 | 8.15E-01 | 7.46E-01 | 9.62E-01 | 9.45E-01 |
| NP_001284.1    | CLNS1A     | methylosome subunit pICln isoform a                                               | 0.94 | 0.95 | 0.90 | 1.08 | 4.82E-01 | 3.64E-01 | 8.43E-01 | 7.80E-01 |
| NP_060561.3    | ELP3       | elongator complex protein 3 isoform 1                                             | 0.85 | 1.01 | 0.86 | 0.96 | 1.22E-01 | 5.44E-02 | 3.93E-01 | 2.64E-01 |
| NP_006829.1    | METAP2     | methionine aminopeptidase 2 isoform 1                                             | 1.22 | 0.96 | 1.17 | 1.04 | 5.09E-02 | 1.36E-02 | 7.20E-02 | 1.44E-02 |
| NP_075568.1    | C8orf33    | UPF0488 protein C8orf33                                                           | 0.99 | 1.00 | 0.99 | 1.09 | 6.36E-01 | 5.33E-01 | 8.63E-01 | 8.08E-01 |
| NP_787072.2    | EXOC8      | exocyst complex component 8                                                       | 1.20 | 0.85 | 0.99 | 1.00 | 6.39E-01 | 5.38E-01 | 4.66E-01 | 3.38E-01 |
| NP_006144.1    | NCK1       | cytoplasmic protein NCK1 isoform 1                                                | 1.07 | 1.06 | 1.12 | 1.02 | 5.86E-01 | 4.77E-01 | 9.44E-01 | 9.19E-01 |
| NP_071436.1    | VSIR       | V-type immunoglobulin domain-containing suppressor of T-cell activation precursor | 0.84 | 0.98 | 0.83 | 1.07 | 3.10E-02 | 5.20E-03 | 7.16E-02 | 1.40E-02 |
| XP_011509935.1 | ANAPC1     | anaphase-promoting complex subunit 1 isoform X1                                   | 1.08 | 0.87 | 0.94 | 1.33 | 7.76E-01 | 6.98E-01 | 4.24E-01 | 2.96E-01 |
| NP_060283.3    | IMPAD1     | Golgi-resident adenosine 3',5'-bisphosphate 3'-phosphatase                        | 0.94 | 1.10 | 1.03 | 1.03 | 7.00E-02 | 2.28E-02 | 4.85E-02 | 4.41E-03 |
| NP_115898.2    | MAK16      | protein MAK16 homolog                                                             | 1.13 | 0.82 | 0.92 | 1.03 | 4.69E-01 | 3.51E-01 | 2.56E-01 | 1.39E-01 |
| NP_543012.1    | OVCA2      | esterase OVCA2                                                                    | 1.09 | 0.96 | 1.05 | 1.05 | 1.11E-01 | 4.66E-02 | 1.23E-01 | 4.26E-02 |
| NP_004220.2    | MED14      | mediator of RNA polymerase II transcription subunit 14                            | 1.04 | 0.93 | 0.97 | 1.08 | 7.74E-01 | 6.96E-01 | 4.92E-01 | 3.66E-01 |
| NP_057118.1    | MRPS2      | 28S ribosomal protein S2, mitochondrial                                           | 1.02 | 1.04 | 1.06 | 1.14 | 5.04E-01 | 3.87E-01 | 7.09E-01 | 6.09E-01 |
| XP_016878625.1 | GCSH       | glycine cleavage system H protein, mitochondrial isoform X1                       | 0.82 | 0.99 | 0.81 | 0.86 | 1.66E-01 | 8.45E-02 | 1.94E-01 | 9.25E-02 |
| NP_001076047.1 | RBFOX2     | RNA binding protein fox-1 homolog 2 isoform 5                                     | 0.98 | 0.98 | 0.96 | 1.01 | 8.39E-01 | 7.76E-01 | 9.64E-01 | 9.47E-01 |
| NP_001275727.1 | MCRIP1     | mapk-regulated corepressor-interacting protein 1 isoform 1                        | 1.15 | 0.79 | 0.91 | 1.07 | 3.19E-02 | 5.50E-03 | 2.73E-01 | 1.54E-01 |
| NP_006058.1    | EMC8       | ER membrane protein complex subunit 8 isoform 1                                   | 1.10 | 1.10 | 1.21 | 1.05 | 2.73E-01 | 1.69E-01 | 9.93E-01 | 9.90E-01 |
| NP_113608.1    | MRPL9      | 39S ribosomal protein L9, mitochondrial isoform 1                                 | 1.06 | 0.93 | 0.99 | 1.06 | 1.89E-01 | 1.01E-01 | 9.17E-02 | 2.52E-02 |
| NP_056018.2    | RPRD2      | regulation of nuclear pre-mRNA domain-containing protein 2 isoform 1              | 0.96 | 1.01 | 0.97 | 1.06 | 2.53E-01 | 1.52E-01 | 2.73E-01 | 1.53E-01 |
| NP_001354872.1 | TCF7L2     | transcription factor 7-like 2 isoform 17                                          | 0.90 | 0.88 | 0.79 | 0.97 | 3.56E-01 | 2.39E-01 | 8.58E-01 | 8.01E-01 |
| NP_056464.1    | IRF2BP1    | interferon regulatory factor 2-binding protein 1                                  | 1.23 | 0.96 | 1.20 | 1.04 | 3.01E-01 | 1.92E-01 | 4.79E-01 | 3.53E-01 |
| XP_005262414.1 | STAG2      | cohesin subunit SA-2 isoform X1                                                   | 1.03 | 0.88 | 0.91 | 1.09 | 5.71E-01 | 4.60E-01 | 3.12E-01 | 1.88E-01 |
| NP_057283.1    | LSM7       | U6 snRNA-associated Sm-like protein LSm7                                          | 1.02 | 0.97 | 0.99 | 1.05 | 4.10E-01 | 2.90E-01 | 1.68E-01 | 7.26E-02 |
| NP_000378.1    | SLC25A20   | mitochondrial carnitine/acylcarnitine carrier protein                             | 1.04 | 0.98 | 1.01 | 1.04 | 7.31E-01 | 6.44E-01 | 6.41E-01 | 5.30E-01 |
| NP_061184.1    | COG1       | conserved oligomeric Golgi complex subunit 1                                      | 1.01 | 0.96 | 0.97 | 1.08 | 7.91E-01 | 7.18E-01 | 5.59E-01 | 4.37E-01 |
| XP_024309520.1 | TBL1XR1    | F-box-like/WD repeat-containing protein TBL1XR1 isoform X1                        | 0.83 | 1.10 | 0.90 | 1.01 | 2.68E-01 | 1.64E-01 | 2.50E-01 | 1.34E-01 |
| NP_001317140.1 | MED24      | mediator of RNA polymerase II transcription subunit 24 isoform 3                  | 1.19 | 0.84 | 0.98 | 1.05 | 6.34E-01 | 5.30E-01 | 4.07E-01 | 2.78E-01 |
| NP_067045.1    | PRUNE1     | exopolyphosphatase PRUNE1 isoform 1                                               | 0.70 | 0.97 | 0.69 | 0.91 | 4.64E-01 | 3.46E-01 | 5.01E-01 | 3.76E-01 |
| NP_115517.1    | NSRP1      | nuclear speckle splicing regulatory protein 1 isoform 1                           | 0.83 | 1.01 | 0.84 | 1.02 | 1.21E-01 | 5.36E-02 | 1.38E-01 | 5.20E-02 |
| NP_115593.3    | ANKRD17    | ankyrin repeat domain-containing protein 17 isoform a                             | 1.00 | 0.89 | 0.89 | 0.89 | 9.82E-01 | 9.73E-01 | 3.72E-01 | 2.44E-01 |
| NP_005116.1    | CCS        | copper chaperone for superoxide dismutase                                         | 0.92 | 0.99 | 0.91 | 1.00 | 4.93E-02 | 1.27E-02 | 1.27E-01 | 4.54E-02 |
| NP_064710.5    | VPS35L     | VPS35 endosomal protein sorting factor-like isoform 1                             | 1.13 | 0.94 | 1.06 | 1.03 | 2.66E-01 | 1.63E-01 | 1.84E-01 | 8.52E-02 |
| NP_001278892.1 | DAP        | death-associated protein 1 isoform 1                                              | 0.91 | 1.07 | 0.98 | 1.01 | 4.59E-01 | 3.40E-01 | 2.90E-01 | 1.68E-01 |
| NP_056240.2    | POLR1A     | DNA-directed RNA polymerase I subunit RPA1                                        | 1.08 | 0.87 | 0.92 | 0.97 | 8.82E-01 | 8.35E-01 | 6.19E-01 | 5.06E-01 |
| NP_001186590.1 | PMF1-BGLAP | PMF1-BGLAP protein isoform 1                                                      | 1.44 | 0.68 | 0.97 | 1.06 | 3.68E-02 | 7.33E-03 | 5.79E-02 | 8.14E-03 |
| NP_112570.2    | MRPS15     | 28S ribosomal protein S15, mitochondrial                                          | 1.09 | 0.96 | 1.05 | 1.09 | 6.50E-02 | 2.05E-02 | 2.42E-01 | 1.27E-01 |
| NP_001288784.1 | SAP30BP    | SAP30-binding protein isoform 1                                                   | 0.94 | 1.02 | 0.96 | 1.07 | 6.90E-01 | 5.96E-01 | 6.16E-01 | 5.02E-01 |

|                |                |                                                                           |      |      |      |      |          |          |          |          |
|----------------|----------------|---------------------------------------------------------------------------|------|------|------|------|----------|----------|----------|----------|
| NP_001358423.1 | LIMS1          | LIM and senescent cell antigen-like-containing domain protein 1 isoform f | 1.32 | 0.93 | 1.22 | 1.01 | 7.54E-02 | 2.58E-02 | 7.96E-02 | 1.79E-02 |
| XP_024307268.1 | TMEM205        | transmembrane protein 205 isoform X2                                      | 1.07 | 0.99 | 1.06 | 1.03 | 5.45E-02 | 1.54E-02 | 3.20E-01 | 1.95E-01 |
| NP_036429.2    | G3BP2          | ras GTPase-activating protein-binding protein 2 isoform a                 | 1.03 | 0.97 | 0.99 | 1.15 | 6.56E-01 | 5.58E-01 | 5.70E-01 | 4.54E-01 |
| NP_115551.2    | UTP15          | U3 small nucleolar RNA-associated protein 15 homolog isoform 1            | 1.02 | 0.95 | 0.97 | 1.07 | 2.95E-03 | 6.43E-05 | 1.55E-01 | 6.36E-02 |
| NP_037478.2    | SNX12          | sorting nexin-12 isoform 1                                                | 1.06 | 1.04 | 1.10 | 1.02 | 1.18E-02 | 8.02E-04 | 5.56E-01 | 4.33E-01 |
| NP_001254747.1 | OSTC           | oligosaccharyltransferase complex subunit OSTC isoform 3                  | 1.15 | 0.96 | 1.11 | 1.04 | 7.43E-02 | 2.51E-02 | 7.36E-02 | 1.52E-02 |
| NP_001107563.1 | CDC27          | cell division cycle protein 27 homolog isoform 1                          | 0.98 | 1.02 | 1.00 | 1.10 | 7.97E-01 | 7.26E-01 | 6.47E-01 | 5.38E-01 |
| NP_057070.3    | CRLF3          | cytokine receptor-like factor 3                                           | 1.24 | 0.99 | 1.23 | 1.28 | 4.74E-01 | 3.56E-01 | 4.65E-01 | 3.37E-01 |
| XP_005263764.1 | IWS1           | protein IWS1 homolog isoform X1                                           | 0.89 | 0.94 | 0.84 | 0.90 | 4.19E-01 | 3.00E-01 | 7.75E-01 | 6.92E-01 |
| NP_001308062.1 | GOSR2          | Golgi SNAP receptor complex member 2 isoform D                            | 1.08 | 0.91 | 0.98 | 1.07 | 1.29E-01 | 5.84E-02 | 2.31E-01 | 1.18E-01 |
| XP_011515960.1 | WASHC1         | WASH complex subunit 1 isoform X1                                         | 0.98 | 1.10 | 1.07 | 1.04 | 2.20E-01 | 1.25E-01 | 9.07E-02 | 2.46E-02 |
| XP_011519299.1 | WNK1           | serine/threonine-protein kinase WNK1 isoform X1                           | 0.90 | 1.02 | 0.92 | 1.10 | 3.09E-01 | 1.97E-01 | 2.82E-01 | 1.61E-01 |
| NP_001186806.1 | SERF2-C15ORF63 | small EDRK-rich factor 2 isoform c                                        | 0.47 | 1.03 | 0.48 | 0.90 | 2.55E-02 | 3.63E-03 | 4.47E-02 | 3.41E-03 |
| NP_055050.1    | UBL4A          | ubiquitin-like protein 4A                                                 | 1.10 | 0.96 | 1.05 | 1.09 | 5.18E-02 | 1.42E-02 | 6.73E-02 | 1.20E-02 |
| NP_001375.2    | DPH2           | 2-(3-amino-3-carboxypropyl)histidine synthase subunit 2 isoform a         | 0.97 | 0.98 | 0.95 | 1.12 | 6.15E-01 | 5.10E-01 | 8.96E-01 | 8.49E-01 |
| NP_443108.1    | NACC1          | nucleus accumbens-associated protein 1                                    | 1.48 | 1.06 | 1.45 | 1.48 | 6.36E-01 | 5.34E-01 | 7.10E-01 | 6.11E-01 |
| XP_016863162.1 | LSM6           | U6 snRNA-associated Sm-like protein LSM6 isoform X1                       | 1.03 | 1.06 | 1.09 | 1.09 | 7.20E-01 | 6.32E-01 | 7.55E-01 | 6.70E-01 |
| NP_005104.4    | GOLGA5         | golgin subfamily A member 5                                               | 1.07 | 1.02 | 1.09 | 1.13 | 3.25E-01 | 2.11E-01 | 4.92E-01 | 3.67E-01 |
| NP_009171.1    | DUSP12         | dual specificity protein phosphatase 12                                   | 1.12 | 1.20 | 1.40 | 1.20 | 7.38E-01 | 6.54E-01 | 8.90E-01 | 8.42E-01 |
| XP_011541800.1 | ARL15          | ADP-ribosylation factor-like protein 15 isoform X1                        | 1.10 | 0.86 | 0.95 | 1.16 | 2.95E-02 | 4.81E-03 | 4.64E-02 | 3.89E-03 |
| NP_001317316.1 | TPRKB          | EKC/KEOPS complex subunit TPRKB isoform a                                 | 1.30 | 1.40 | 1.80 | 1.49 | 7.37E-02 | 2.47E-02 | 8.51E-01 | 7.92E-01 |
| NP_001358976.1 | NNMT           | nicotinamide N-methyltransferase                                          | 1.10 | 0.97 | 1.07 | 1.15 | 1.23E-01 | 5.48E-02 | 1.08E-01 | 3.39E-02 |
| NP_001003800.1 | BICD2          | protein bicaudal D homolog 2 isoform 1                                    | 0.79 | 1.11 | 0.88 | 0.97 | 1.90E-02 | 2.15E-03 | 4.54E-02 | 3.57E-03 |
| NP_002067.1    | GNS            | N-acetylglucosamine-6-sulfatase precursor                                 | 0.97 | 0.95 | 0.93 | 1.00 | 1.93E-01 | 1.04E-01 | 3.26E-01 | 2.01E-01 |
| NP_113673.3    | GRWD1          | glutamate-rich WD repeat-containing protein 1                             | 0.98 | 0.94 | 0.92 | 1.15 | 7.61E-01 | 6.81E-01 | 7.17E-01 | 6.19E-01 |
| NP_000079.2    | COL1A1         | collagen alpha-1(I) chain                                                 | 0.98 | 0.85 | 0.84 | 1.24 | 6.85E-01 | 5.94E-01 | 1.09E-01 | 3.43E-02 |
| NP_987093.1    | COMMD6         | COMM domain-containing protein 6 isoform a                                | 1.00 | 0.96 | 0.96 | 1.13 | 9.95E-01 | 9.94E-01 | 7.59E-01 | 6.74E-01 |
| XP_011519397.1 | UGGT2          | UDP-glucose:glycoprotein glucosyltransferase 2 isoform X2                 | 0.83 | 1.02 | 0.84 | 1.04 | 2.48E-01 | 1.47E-01 | 3.42E-01 | 2.15E-01 |
| NP_001035933.3 | SUMF2          | inactive C-alpha-formylglycine-generating enzyme 2 isoform a precursor    | 1.05 | 1.10 | 1.16 | 1.10 | 5.07E-02 | 1.34E-02 | 6.27E-01 | 5.15E-01 |
| NP_116204.3    | NFATC2IP       | NFATC2-interacting protein                                                | 1.00 | 0.87 | 0.87 | 1.18 | 9.46E-01 | 9.24E-01 | 4.25E-01 | 2.97E-01 |
| NP_056195.3    | SAMM50         | sorting and assembly machinery component 50 homolog                       | 1.04 | 0.95 | 0.99 | 1.04 | 1.18E-01 | 5.15E-02 | 9.17E-02 | 2.52E-02 |
| NP_057132.2    | ISOC1          | isochorismatase domain-containing protein 1                               | 0.95 | 0.97 | 0.92 | 0.91 | 1.22E-02 | 8.54E-04 | 7.19E-01 | 6.22E-01 |
| NP_653164.2    | RPIA           | ribose-5-phosphate isomerase                                              | 0.96 | 0.99 | 0.95 | 0.98 | 1.81E-01 | 9.52E-02 | 6.01E-01 | 4.86E-01 |
| NP_001287830.1 | TCEAL4         | transcription elongation factor A protein-like 4 isoform 2                | 0.94 | 1.23 | 1.19 | 1.03 | 7.96E-01 | 7.25E-01 | 5.01E-01 | 3.75E-01 |
| NP_006712.2    | ADK            | adenosine kinase isoform b                                                | 1.15 | 1.03 | 1.19 | 1.07 | 1.01E-01 | 4.06E-02 | 1.66E-01 | 7.14E-02 |
| NP_689618.4    | JMY            | junction-mediating and -regulatory protein                                | 1.10 | 1.28 | 1.42 | 1.10 | 1.96E-01 | 1.07E-01 | 1.55E-01 | 6.43E-02 |
| NP_006519.1    | TFPI2          | tissue factor pathway inhibitor 2 isoform 1 precursor                     | 1.13 | 0.82 | 0.94 | 0.91 | 3.00E-01 | 1.91E-01 | 2.31E-01 | 1.18E-01 |
| NP_060716.2    | CCDC25         | coiled-coil domain-containing protein 25 isoform 1                        | 1.03 | 0.99 | 1.02 | 1.07 | 3.84E-01 | 2.66E-01 | 7.18E-01 | 6.21E-01 |
| XP_016877278.1 | MAPK1IP1L      | MAPK-interacting and spindle-stabilizing protein-like isoform X2          | 0.71 | 1.01 | 0.72 | 0.84 | 8.66E-02 | 3.20E-02 | 1.04E-01 | 3.13E-02 |
| NP_071898.2    | RNF25          | E3 ubiquitin-protein ligase RNF25                                         | 0.99 | 0.97 | 0.97 | 0.97 | 1.93E-01 | 1.04E-01 | 2.98E-01 | 1.76E-01 |
| NP_060934.1    | CISD1          | CDGSH iron-sulfur domain-containing protein 1                             | 0.93 | 1.06 | 0.99 | 0.93 | 1.34E-01 | 6.20E-02 | 6.87E-01 | 5.85E-01 |
| XP_011536103.1 | BAZZA          | bromodomain adjacent to zinc finger domain protein 2A isoform X1          | 1.16 | 1.01 | 1.17 | 1.08 | 1.33E-01 | 6.14E-02 | 2.47E-01 | 1.32E-01 |
| XP_005253647.1 | DHX37          | probable ATP-dependent RNA helicase DHX37 isoform X1                      | 0.87 | 1.02 | 0.89 | 0.96 | 1.81E-01 | 9.54E-02 | 2.79E-01 | 1.59E-01 |
| NP_001070867.1 | PNKD           | probable hydrolase PNKD isoform 3 precursor                               | 1.18 | 0.82 | 0.96 | 1.13 | 5.04E-02 | 1.31E-02 | 1.84E-01 | 8.56E-02 |
| NP_036380.2    | SEPHS2         | selenide, water dikinase 2                                                | 1.20 | 1.00 | 1.18 | 1.27 | 4.85E-01 | 3.68E-01 | 5.61E-01 | 4.40E-01 |
| NP_004538.2    | NDUFB4         | NADH dehydrogenase [ubiquinone] 1 beta subcomplex subunit 4 isoform 1     | 1.16 | 0.96 | 1.11 | 1.11 | 8.86E-02 | 3.31E-02 | 3.16E-01 | 1.92E-01 |

|                |          |                                                                            |      |      |      |      |          |          |          |          |
|----------------|----------|----------------------------------------------------------------------------|------|------|------|------|----------|----------|----------|----------|
| NP_037519.2    | UQCR10   | cytochrome b-c1 complex subunit 9 isoform a                                | 1.06 | 0.91 | 0.96 | 1.04 | 1.86E-02 | 2.05E-03 | 7.01E-02 | 1.33E-02 |
| NP_056169.1    | NUP188   | nucleoporin NUP188 homolog                                                 | 1.33 | 0.81 | 1.04 | 1.15 | 3.21E-01 | 2.08E-01 | 3.65E-01 | 2.36E-01 |
| NP_001303243.1 | PLCB3    | 1-phosphatidylinositol 4,5-bisphosphate phosphodiesterase beta-3 isoform 1 | 1.05 | 0.90 | 0.94 | 1.08 | 6.72E-01 | 5.75E-01 | 2.66E-01 | 1.48E-01 |
| NP_073742.2    | AIDA     | axin interactor, dorsalization-associated protein                          | 0.95 | 1.06 | 1.00 | 1.06 | 3.49E-01 | 2.32E-01 | 3.01E-01 | 1.79E-01 |
| XP_011515603.1 | GSDMD    | gasdermin-D isoform X1                                                     | 0.84 | 1.27 | 1.07 | 0.93 | 2.02E-01 | 1.11E-01 | 8.84E-02 | 2.30E-02 |
| NP_001350894.1 | RABL3    | rab-like protein 3 isoform 1                                               | 1.07 | 0.89 | 0.96 | 1.00 | 4.93E-01 | 3.75E-01 | 3.29E-01 | 2.04E-01 |
| NP_976225.1    | ZRANB2   | zinc finger Ran-binding domain-containing protein 2 isoform 1              | 0.76 | 1.11 | 0.85 | 0.88 | 2.21E-02 | 2.81E-03 | 3.53E-02 | 1.67E-03 |
| XP_006723234.1 | STRN4    | striatin-4 isoform X1                                                      | 1.02 | 0.95 | 0.97 | 1.04 | 2.56E-01 | 1.54E-01 | 2.31E-01 | 1.17E-01 |
| NP_055472.1    | TTI1     | TELO2-interacting protein 1 homolog                                        | 1.00 | 0.88 | 0.84 | 0.95 | 9.26E-01 | 8.91E-01 | 8.62E-01 | 8.07E-01 |
| NP_942590.1    | NUP43    | nucleoporin Nup43                                                          | 1.06 | 0.90 | 0.95 | 1.10 | 2.08E-01 | 1.16E-01 | 8.57E-02 | 2.14E-02 |
| NP_115686.3    | CARD19   | caspase recruitment domain-containing protein 19 isoform 1                 | 0.97 | 1.02 | 0.99 | 1.00 | 4.62E-01 | 3.43E-01 | 5.68E-01 | 4.49E-01 |
| NP_000936.1    | PPP3R1   | calcineurin subunit B type 1                                               | 0.97 | 0.98 | 0.95 | 1.07 | 5.32E-01 | 4.17E-01 | 8.53E-01 | 7.94E-01 |
| XP_016874389.1 | DGKA     | diacylglycerol kinase alpha isoform X1                                     | 1.06 | 0.99 | 1.04 | 1.14 | 5.97E-01 | 4.90E-01 | 5.33E-01 | 4.09E-01 |
| XP_006715324.1 | TJAP1    | tight junction-associated protein 1 isoform X1                             | 0.96 | 1.02 | 0.98 | 1.14 | 7.44E-01 | 6.62E-01 | 6.50E-01 | 5.44E-01 |
| NP_005524.2    | IFI35    | interferon-induced 35 kDa protein isoform 1                                | 1.03 | 1.03 | 1.06 | 1.03 | 6.60E-01 | 5.63E-01 | 9.82E-01 | 9.74E-01 |
| NP_060386.1    | PIH1D1   | PIH1 domain-containing protein 1                                           | 1.08 | 0.88 | 0.95 | 1.07 | 5.10E-01 | 3.93E-01 | 2.60E-01 | 1.41E-01 |
| XP_005254336.1 | GALK2    | N-acetylgalactosamine kinase isoform X1                                    | 1.19 | 0.90 | 1.07 | 1.04 | 9.39E-02 | 3.59E-02 | 1.26E-01 | 4.42E-02 |
| NP_009185.2    | PNKP     | bifunctional polynucleotide phosphatase/kinase                             | 1.17 | 0.90 | 1.04 | 1.01 | 3.76E-01 | 2.58E-01 | 3.95E-01 | 2.66E-01 |
| NP_000704.1    | BLVRB    | flavin reductase (NADPH)                                                   | 1.16 | 0.82 | 0.96 | 0.93 | 4.22E-01 | 3.02E-01 | 2.36E-01 | 1.22E-01 |
| NP_071383.1    | MRPS14   | 28S ribosomal protein S14, mitochondrial                                   | 1.01 | 0.94 | 0.94 | 1.05 | 8.82E-01 | 8.36E-01 | 5.66E-01 | 4.46E-01 |
| XP_024307075.1 | SUGP2    | SURP and G-patch domain-containing protein 2 isoform X1                    | 1.01 | 0.89 | 0.90 | 1.02 | 9.27E-01 | 8.94E-01 | 3.77E-01 | 2.49E-01 |
| NP_005768.1    | RBM6     | RNA-binding protein 6 isoform 1                                            | 0.91 | 0.98 | 0.89 | 1.01 | 1.77E-01 | 9.26E-02 | 2.78E-01 | 1.57E-01 |
| XP_011513235.2 | RIOK1    | serine/threonine-protein kinase RIO1 isoform X1                            | 0.92 | 1.03 | 0.95 | 0.89 | 7.38E-01 | 6.55E-01 | 6.66E-01 | 5.61E-01 |
| NP_036455.1    | MAFF     | transcription factor MafF isoform a                                        | 1.14 | 1.12 | 1.27 | 1.24 | 5.07E-02 | 1.34E-02 | 4.49E-01 | 3.20E-01 |
| NP_981951.2    | MBLAC2   | metallo-beta-lactamase domain-containing protein 2                         | 0.94 | 0.99 | 0.93 | 1.04 | 2.25E-01 | 1.28E-01 | 6.22E-01 | 5.10E-01 |
| NP_060599.1    | PNPO     | pyridoxine-5'-phosphate oxidase                                            | 1.09 | 0.91 | 0.98 | 1.23 | 6.81E-01 | 5.87E-01 | 5.76E-01 | 4.59E-01 |
| XP_011520703.1 | ABAT     | 4-aminobutyrate aminotransferase, mitochondrial isoform X1                 | 0.97 | 1.14 | 1.10 | 1.13 | 7.39E-01 | 6.56E-01 | 5.63E-01 | 4.43E-01 |
| NP_001317182.1 | SCYL2    | SCY1-like protein 2 isoform 2                                              | 1.05 | 1.02 | 1.07 | 1.09 | 1.68E-01 | 8.60E-02 | 4.50E-01 | 3.21E-01 |
| NP_036549.2    | PITPNC1  | cytoplasmic phosphatidylinositol transfer protein 1 isoform a              | 1.05 | 0.98 | 1.03 | 1.10 | 4.05E-01 | 2.84E-01 | 3.21E-01 | 1.96E-01 |
| NP_006658.1    | PGRMC1   | membrane-associated progesterone receptor component 1 isoform 1            | 1.08 | 1.03 | 1.11 | 0.97 | 1.37E-01 | 6.35E-02 | 2.75E-01 | 1.55E-01 |
| NP_612464.1    | CTHRC1   | collagen triple helix repeat-containing protein 1 isoform 1 precursor      | 0.70 | 1.13 | 0.79 | 0.96 | 7.53E-02 | 2.58E-02 | 8.79E-02 | 2.27E-02 |
| NP_005054.3    | SCD      | acyl-CoA desaturase                                                        | 0.72 | 1.03 | 0.74 | 1.36 | 6.31E-02 | 1.97E-02 | 1.82E-01 | 8.34E-02 |
| XP_006720071.1 | FERMT2   | fermitin family homolog 2 isoform X1                                       | 0.67 | 1.33 | 0.81 | 0.76 | 4.35E-01 | 3.15E-01 | 3.71E-01 | 2.43E-01 |
| NP_057049.5    | NDUFA13  | NADH dehydrogenase [ubiquinone] 1 alpha subcomplex subunit 13              | 1.01 | 1.01 | 1.02 | 0.98 | 8.33E-01 | 7.68E-01 | 9.42E-01 | 9.15E-01 |
| NP_787117.3    | C5orf51  | UPF0600 protein C5orf51                                                    | 0.95 | 1.00 | 0.95 | 1.02 | 8.03E-01 | 7.33E-01 | 8.13E-01 | 7.40E-01 |
| NP_076968.2    | SPATA5L1 | spermatogenesis-associated protein 5-like protein 1 isoform 1              | 1.12 | 0.82 | 0.92 | 1.09 | 2.46E-01 | 1.46E-01 | 9.59E-02 | 2.73E-02 |
| NP_001002755.1 | NFU1     | NFU1 iron-sulfur cluster scaffold homolog, mitochondrial isoform 2         | 0.69 | 1.07 | 0.74 | 0.91 | 4.32E-02 | 9.91E-03 | 5.83E-02 | 8.36E-03 |
| NP_689518.1    | POGLUT1  | protein O-glucosyltransferase 1 precursor                                  | 0.87 | 1.08 | 0.94 | 0.95 | 3.77E-01 | 2.60E-01 | 2.58E-01 | 1.40E-01 |
| NP_005008.2    | PCYT1A   | choline-phosphate cytidylyltransferase A                                   | 1.04 | 1.02 | 1.06 | 1.29 | 6.39E-01 | 5.39E-01 | 9.07E-01 | 8.64E-01 |
| NP_056036.1    | DNMBP    | dynamamin-binding protein isoform a                                        | 0.90 | 1.22 | 1.09 | 0.90 | 1.52E-01 | 7.42E-02 | 2.33E-01 | 1.20E-01 |
| NP_057616.2    | INPP5K   | inositol polyphosphate 5-phosphatase K isoform 1                           | 1.06 | 0.99 | 1.05 | 0.93 | 1.99E-01 | 1.09E-01 | 4.87E-01 | 3.60E-01 |
| XP_006713103.1 | CLASP2   | CLIP-associating protein 2 isoform X1                                      | 0.81 | 1.23 | 0.99 | 0.96 | 1.16E-01 | 4.97E-02 | 1.99E-01 | 9.59E-02 |
| NP_055870.2    | SWAP70   | switch-associated protein 70 isoform 1                                     | 1.13 | 1.14 | 1.29 | 1.07 | 6.58E-02 | 2.08E-02 | 6.48E-01 | 5.42E-01 |
| XP_011510867.1 | PLCH1    | 1-phosphatidylinositol 4,5-bisphosphate phosphodiesterase eta-1 isoform X5 | 1.41 | 0.66 | 0.93 | 1.17 | 2.34E-02 | 3.12E-03 | 3.45E-02 | 1.01E-03 |
| XP_016866508.1 | EXOC2    | exocyst complex component 2 isoform X1                                     | 1.03 | 1.06 | 1.09 | 1.15 | 6.36E-01 | 5.35E-01 | 8.78E-01 | 8.28E-01 |
| NP_055419.1    | TAX1BP3  | tax1-binding protein 3 isoform 1                                           | 0.99 | 0.89 | 0.88 | 1.02 | 9.45E-01 | 9.23E-01 | 4.94E-01 | 3.68E-01 |
| XP_016879398.1 | SETD1A   | histone-lysine N-methyltransferase SETD1A isoform X1                       | 0.96 | 1.04 | 1.01 | 1.14 | 2.98E-01 | 1.88E-01 | 1.60E-01 | 6.76E-02 |



|                |          |                                                                                           |      |      |      |      |          |          |          |          |
|----------------|----------|-------------------------------------------------------------------------------------------|------|------|------|------|----------|----------|----------|----------|
| NP_077001.1    | DCTP1    | dCTP pyrophosphatase 1                                                                    | 1.11 | 1.24 | 1.38 | 1.20 | 7.49E-01 | 6.67E-01 | 6.71E-01 | 5.67E-01 |
| NP_054888.3    | CHMP4A   | charged multivesicular body protein 4a                                                    | 0.91 | 1.05 | 0.96 | 1.07 | 1.04E-01 | 4.21E-02 | 8.50E-02 | 2.10E-02 |
| NP_003093.2    | SOD3     | extracellular superoxide dismutase [Cu-Zn]                                                | 0.97 | 1.03 | 0.99 | 1.00 | 8.69E-01 | 8.15E-01 | 7.93E-01 | 7.16E-01 |
| XP_024306618.1 | ELAC2    | zinc phosphodiesterase ELAC protein 2 isoform X1                                          | 0.95 | 1.04 | 0.98 | 1.01 | 6.93E-01 | 6.02E-01 | 5.57E-01 | 4.34E-01 |
| NP_660309.1    | NUDCD2   | nudC domain-containing protein 2 isoform 1                                                | 0.94 | 1.07 | 1.00 | 1.06 | 1.11E-01 | 4.65E-02 | 1.05E-01 | 3.22E-02 |
| NP_055577.1    | DHCR24   | delta(24)-sterol reductase precursor                                                      | 0.88 | 1.05 | 0.92 | 0.95 | 2.08E-03 | 2.88E-05 | 3.53E-02 | 1.61E-03 |
| XP_011515553.1 | STK3     | serine/threonine-protein kinase 3 isoform X4                                              | 0.76 | 0.97 | 0.72 | 0.92 | 5.52E-01 | 4.39E-01 | 6.04E-01 | 4.90E-01 |
| NP_006082.3    | CORO2B   | coronin-2B isoform 1                                                                      | 1.00 | 0.93 | 0.93 | 0.99 | 9.99E-01 | 9.99E-01 | 4.34E-01 | 3.06E-01 |
| NP_056345.3    | GORASP2  | Golgi reassembly-stacking protein 2 isoform 1                                             | 0.98 | 1.05 | 1.02 | 1.09 | 4.67E-01 | 3.49E-01 | 3.36E-01 | 2.10E-01 |
| NP_002102.4    | HTT      | huntingtin                                                                                | 1.06 | 1.18 | 1.25 | 1.14 | 5.33E-02 | 1.48E-02 | 8.30E-01 | 7.62E-01 |
| XP_024309460.1 | EEFSEC   | selenocysteine-specific elongation factor isoform X1                                      | 0.90 | 0.98 | 0.88 | 1.02 | 5.19E-01 | 4.05E-01 | 6.01E-01 | 4.86E-01 |
| NP_004573.2    | RABGGTB  | geranylgeranyl transferase type-2 subunit beta                                            | 1.16 | 0.96 | 1.11 | 1.13 | 2.26E-02 | 2.91E-03 | 4.48E-02 | 3.50E-03 |
| NP_060764.3    | CWF19L1  | CWF19-like protein 1 isoform 1                                                            | 1.06 | 0.78 | 0.81 | 1.01 | 8.85E-01 | 8.39E-01 | 3.73E-01 | 2.45E-01 |
| XP_006722716.1 | C19orf25 | UPF0449 protein C19orf25 isoform X1                                                       | 1.83 | 0.61 | 1.10 | 1.38 | 2.86E-01 | 1.79E-01 | 1.57E-01 | 6.54E-02 |
| NP_001303880.1 | GPALPP1  | GPALPP motifs-containing protein 1 isoform a                                              | 0.83 | 0.98 | 0.81 | 0.98 | 2.26E-01 | 1.29E-01 | 2.84E-01 | 1.63E-01 |
| NP_056415.1    | ABHD12   | lysophosphatidylserine lipase ABHD12 isoform b                                            | 0.93 | 1.01 | 0.94 | 1.00 | 5.09E-02 | 1.36E-02 | 3.63E-01 | 2.34E-01 |
| NP_006236.1    | PPP2R5D  | serine/threonine-protein phosphatase 2A 56 kDa regulatory subunit delta isoform isoform 1 | 1.13 | 0.84 | 0.95 | 1.02 | 9.32E-02 | 3.55E-02 | 5.35E-02 | 6.39E-03 |
| NP_859052.3    | QSOX2    | sulfhydryl oxidase 2 precursor                                                            | 1.21 | 1.19 | 1.49 | 1.23 | 6.16E-01 | 5.12E-01 | 9.92E-01 | 9.87E-01 |
| NP_001129204.1 | TOM1     | target of Myb protein 1 isoform 2                                                         | 0.85 | 0.95 | 0.80 | 1.03 | 3.84E-01 | 2.66E-01 | 6.21E-01 | 5.07E-01 |
| NP_001258803.1 | AAR2     | protein AAR2 homolog                                                                      | 1.10 | 0.91 | 1.00 | 1.18 | 1.39E-01 | 6.54E-02 | 8.74E-02 | 2.25E-02 |
| NP_060855.2    | LSG1     | large subunit GTPase 1 homolog                                                            | 1.07 | 1.00 | 1.07 | 1.05 | 1.49E-01 | 7.24E-02 | 1.94E-01 | 9.26E-02 |
| NP_085148.1    | SH3BP5L  | SH3 domain-binding protein 5-like isoform 1                                               | 0.72 | 1.02 | 0.73 | 0.88 | 5.76E-02 | 1.70E-02 | 8.40E-02 | 2.03E-02 |
| XP_016884516.1 | THOC5    | THO complex subunit 5 homolog isoform X1                                                  | 1.03 | 1.00 | 1.04 | 1.03 | 8.77E-02 | 3.26E-02 | 5.68E-01 | 4.50E-01 |
| NP_001311126.1 | ITCH     | E3 ubiquitin-protein ligase Itchy homolog isoform 1                                       | 1.36 | 0.69 | 0.90 | 0.91 | 6.53E-01 | 5.54E-01 | 3.70E-01 | 2.41E-01 |
| NP_958437.1    | BLOC1S5  | biogenesis of lysosome-related organelles complex 1 subunit 5 isoform 1                   | 1.04 | 1.08 | 1.12 | 1.33 | 6.59E-01 | 5.61E-01 | 6.16E-01 | 5.02E-01 |
| NP_008817.1    | ATP5F1E  | ATP synthase subunit epsilon, mitochondrial                                               | 1.03 | 0.93 | 0.96 | 0.97 | 6.43E-01 | 5.44E-01 | 2.62E-01 | 1.44E-01 |
| NP_001252.1    | CDK9     | cyclin-dependent kinase 9                                                                 | 0.96 | 1.32 | 1.27 | 1.00 | 7.50E-01 | 6.68E-01 | 2.01E-01 | 9.71E-02 |
| NP_689677.1    | TMEM199  | transmembrane protein 199                                                                 | 1.43 | 0.48 | 0.66 | 1.03 | 4.24E-01 | 3.05E-01 | 1.50E-01 | 6.03E-02 |
| NP_001317652.1 | SNX27    | sorting nexin-27 isoform 1                                                                | 1.01 | 0.95 | 0.96 | 1.05 | 8.15E-01 | 7.46E-01 | 6.32E-01 | 5.21E-01 |
| NP_005984.3    | TBCD     | tubulin-specific chaperone D                                                              | 0.95 | 0.94 | 0.89 | 0.87 | 3.38E-01 | 2.22E-01 | 9.57E-01 | 9.38E-01 |
| NP_078930.4    | NOL9     | polynucleotide 5'-hydroxyl-kinase NOL9                                                    | 1.11 | 0.83 | 0.92 | 1.03 | 3.16E-01 | 2.04E-01 | 1.28E-01 | 4.62E-02 |
| NP_003907.3    | AP1S2    | AP-1 complex subunit sigma-2 isoform 2                                                    | 1.09 | 1.02 | 1.11 | 1.13 | 4.82E-01 | 3.64E-01 | 6.46E-01 | 5.36E-01 |
| NP_115607.1    | CIAO2A   | cytosolic iron-sulfur assembly component 2A isoform a precursor                           | 1.11 | 0.80 | 0.87 | 0.93 | 4.61E-01 | 3.41E-01 | 2.27E-01 | 1.15E-01 |
| XP_016876870.1 | PPM1A    | protein phosphatase 1A isoform X1                                                         | 1.06 | 0.98 | 1.04 | 1.07 | 6.74E-02 | 2.17E-02 | 6.77E-02 | 1.23E-02 |
| XP_005245462.1 | RFX5     | DNA-binding protein RFX5 isoform X1                                                       | 0.96 | 1.00 | 0.96 | 1.11 | 4.74E-01 | 3.57E-01 | 5.66E-01 | 4.46E-01 |
| NP_003667.1    | DEGS1    | sphingolipid delta(4)-desaturase DES1 isoform 1                                           | 1.01 | 0.99 | 1.01 | 1.28 | 8.82E-01 | 8.35E-01 | 8.97E-01 | 8.52E-01 |
| XP_016884588.1 | GTPBP1   | GTP-binding protein 1 isoform X1                                                          | 1.14 | 0.95 | 1.08 | 1.08 | 1.30E-01 | 5.93E-02 | 4.08E-01 | 2.79E-01 |
| NP_000391.1    | ERCC2    | general transcription and DNA repair factor III helicase subunit XPD isoform 1            | 1.07 | 0.81 | 0.86 | 1.02 | 2.59E-01 | 1.56E-01 | 2.34E-01 | 1.21E-01 |
| NP_001350870.1 | ARMC8    | armadillo repeat-containing protein 8 isoform 6                                           | 1.19 | 1.02 | 1.22 | 1.31 | 1.81E-01 | 9.55E-02 | 5.58E-01 | 4.36E-01 |
| NP_000700.1    | BCKDHA   | 2-oxoisovalerate dehydrogenase subunit alpha, mitochondrial isoform 1 precursor           | 0.83 | 1.01 | 0.76 | 0.94 | 6.53E-01 | 5.54E-01 | 7.52E-01 | 6.64E-01 |
| NP_059139.3    | POLE3    | DNA polymerase epsilon subunit 3                                                          | 0.85 | 1.05 | 0.89 | 1.02 | 2.80E-03 | 5.61E-05 | 8.47E-02 | 2.08E-02 |
| NP_006010.2    | TCIRG1   | V-type proton ATPase 116 kDa subunit a isoform 3 isoform a                                | 1.13 | 0.94 | 1.06 | 1.03 | 1.05E-01 | 4.30E-02 | 1.05E-01 | 3.17E-02 |
| NP_060536.3    | GPN2     | GPN-loop GTPase 2                                                                         | 0.76 | 1.28 | 0.91 | 0.88 | 4.40E-01 | 3.20E-01 | 4.40E-01 | 3.11E-01 |
| NP_060062.2    | MED29    | mediator of RNA polymerase II transcription subunit 29 isoform 1                          | 0.85 | 1.07 | 0.90 | 0.97 | 1.62E-01 | 8.18E-02 | 1.30E-01 | 4.75E-02 |
| NP_059133.1    | CPSF2    | cleavage and polyadenylation specificity factor subunit 2 isoform 1                       | 0.99 | 0.99 | 0.98 | 1.01 | 8.75E-01 | 8.25E-01 | 9.82E-01 | 9.74E-01 |
| NP_003867.1    | TMEM11   | transmembrane protein 11, mitochondrial                                                   | 1.00 | 0.98 | 0.99 | 1.02 | 9.42E-01 | 9.16E-01 | 5.49E-01 | 4.27E-01 |
| XP_005268263.1 | ELMSAN1  | ELM2 and SANT domain-containing protein 1 isoform X1                                      | 0.97 | 0.98 | 0.94 | 1.05 | 6.44E-01 | 5.45E-01 | 9.43E-01 | 9.17E-01 |

|                |              |                                                                                    |      |      |      |      |          |          |          |          |
|----------------|--------------|------------------------------------------------------------------------------------|------|------|------|------|----------|----------|----------|----------|
| NP_037374.1    | CFAP20       | cilia- and flagella-associated protein 20                                          | 1.17 | 0.91 | 1.06 | 1.08 | 2.05E-02 | 2.48E-03 | 6.05E-02 | 9.26E-03 |
| NP_001093139.1 | HIGD1A       | HIG1 domain family member 1A, mitochondrial isoform b                              | 1.23 | 0.98 | 1.20 | 1.25 | 6.67E-02 | 2.13E-02 | 8.25E-02 | 1.95E-02 |
| NP_077719.2    | NOTCH2       | neurogenic locus notch homolog protein 2 isoform 1                                 | 0.70 | 1.34 | 0.91 | 0.79 | 2.18E-01 | 1.23E-01 | 1.78E-01 | 8.09E-02 |
| NP_057036.2    | RWDD1        | RWD domain-containing protein 1 isoform a                                          | 0.74 | 1.05 | 0.78 | 0.88 | 8.87E-02 | 3.32E-02 | 1.04E-01 | 3.16E-02 |
| XP_024302662.1 | SRPK2        | SRSF protein kinase 2 isoform X3                                                   | 1.08 | 0.93 | 1.00 | 1.07 | 2.62E-01 | 1.60E-01 | 1.76E-01 | 7.96E-02 |
| NP_001304818.1 | TATDN1       | putative deoxyribonuclease TATDN1 isoform c                                        | 1.12 | 0.91 | 1.01 | 1.06 | 5.47E-01 | 4.33E-01 | 4.44E-01 | 3.16E-01 |
| NP_065145.2    | CHMP1B       | charged multivesicular body protein 1b                                             | 1.02 | 0.96 | 0.97 | 1.08 | 6.81E-01 | 5.86E-01 | 3.88E-01 | 2.59E-01 |
| NP_056442.2    | LDLRAP1      | low density lipoprotein receptor adapter protein 1                                 | 0.97 | 0.92 | 0.90 | 0.94 | 4.02E-01 | 2.81E-01 | 2.28E-01 | 1.15E-01 |
| NP_057085.2    | UTP18        | U3 small nucleolar RNA-associated protein 18 homolog                               | 0.97 | 1.05 | 1.02 | 1.07 | 6.14E-01 | 5.09E-01 | 5.35E-01 | 4.12E-01 |
| NP_852615.1    | MRPL21       | 39S ribosomal protein L21, mitochondrial isoform d                                 | 1.19 | 0.80 | 0.95 | 1.12 | 1.83E-01 | 9.65E-02 | 9.50E-02 | 2.71E-02 |
| NP_057078.1    | ATP6V1D      | V-type proton ATPase subunit D                                                     | 1.12 | 1.07 | 1.19 | 1.22 | 2.38E-02 | 3.24E-03 | 5.58E-01 | 4.35E-01 |
| XP_006719826.1 | EXOSC8       | exosome complex component RRP43 isoform X1                                         | 0.94 | 1.36 | 1.27 | 1.20 | 3.17E-01 | 2.05E-01 | 1.38E-01 | 5.23E-02 |
| NP_056986.2    | UBR5         | E3 ubiquitin-protein ligase UBR5 isoform 1                                         | 1.10 | 0.84 | 0.92 | 1.09 | 3.67E-01 | 2.49E-01 | 1.75E-01 | 7.85E-02 |
| NP_001315.1    | CSTF1        | cleavage stimulation factor subunit 1                                              | 1.03 | 0.93 | 0.96 | 0.99 | 8.48E-01 | 7.88E-01 | 4.73E-01 | 3.45E-01 |
| NP_056139.1    | RRP8         | ribosomal RNA-processing protein 8                                                 | 1.04 | 1.01 | 1.05 | 1.14 | 4.27E-01 | 3.07E-01 | 7.42E-01 | 6.52E-01 |
| XP_016879565.1 | SYNRG        | synergin gamma isoform X1                                                          | 1.09 | 0.92 | 1.00 | 1.13 | 6.17E-02 | 1.88E-02 | 1.94E-01 | 9.26E-02 |
| NP_001350671.1 | ATG16L1      | autophagy-related protein 16-1 isoform 6                                           | 0.91 | 1.21 | 1.05 | 1.03 | 7.37E-01 | 6.52E-01 | 5.68E-01 | 4.50E-01 |
| XP_011507442.1 | NIBAN1       | protein Niban 1 isoform X1                                                         | 1.14 | 1.11 | 1.26 | 1.11 | 1.72E-01 | 8.93E-02 | 8.49E-01 | 7.88E-01 |
| NP_004877.1    | APBA3        | amyloid-beta A4 precursor protein-binding family A member 3                        | 1.10 | 0.89 | 0.98 | 1.06 | 2.46E-01 | 1.45E-01 | 2.58E-01 | 1.40E-01 |
| NP_001335325.1 | ST3GAL4      | CMP-N-acetylneuraminase-beta-galactosamide-alpha-2,3-sialyltransferase 4 isoform 4 | 1.09 | 0.86 | 0.92 | 1.12 | 8.20E-01 | 7.53E-01 | 5.12E-01 | 3.89E-01 |
| XP_005264577.1 | GCFC2        | GC-rich sequence DNA-binding factor 2 isoform X1                                   | 0.97 | 1.03 | 1.01 | 1.07 | 4.20E-01 | 3.00E-01 | 5.62E-01 | 4.42E-01 |
| XP_011531375.1 | STRN         | striatin isoform X1                                                                | 0.98 | 1.01 | 0.99 | 1.06 | 6.35E-01 | 5.32E-01 | 7.44E-01 | 6.55E-01 |
| NP_057517.1    | GLTP         | glycolipid transfer protein                                                        | 1.05 | 0.99 | 1.04 | 1.09 | 3.95E-02 | 8.44E-03 | 2.00E-01 | 9.68E-02 |
| XP_016875377.1 | SOX5         | transcription factor SOX-5 isoform X1                                              | 0.89 | 1.03 | 0.92 | 0.96 | 2.03E-01 | 1.12E-01 | 1.89E-01 | 8.86E-02 |
| NP_006848.1    | SNRNP27      | U4/U6.U5 small nuclear ribonucleoprotein 27 kDa protein                            | 1.16 | 1.17 | 1.38 | 1.68 | 5.39E-01 | 4.25E-01 | 9.56E-01 | 9.37E-01 |
| NP_075391.3    | INTS3        | integrator complex subunit 3                                                       | 1.08 | 0.89 | 0.96 | 1.00 | 4.15E-01 | 2.95E-01 | 1.74E-01 | 7.78E-02 |
| NP_002877.2    | RAP2B        | ras-related protein Rap-2b                                                         | 1.05 | 1.09 | 1.14 | 1.17 | 5.78E-03 | 1.93E-04 | 7.28E-01 | 6.32E-01 |
| NP_000080.2    | COL1A2       | collagen alpha-2(I) chain precursor                                                | 1.13 | 0.84 | 0.95 | 1.21 | 2.01E-01 | 1.10E-01 | 8.66E-02 | 2.21E-02 |
| XP_016855889.1 | SLC30A7      | zinc transporter 7 isoform X1                                                      | 1.26 | 0.79 | 1.00 | 1.06 | 8.02E-02 | 2.83E-02 | 5.70E-02 | 7.67E-03 |
| NP_477517.1    | BORCS5       | BLOC-1-related complex subunit 5 isoform 1                                         | 1.04 | 0.88 | 0.91 | 1.21 | 3.52E-01 | 2.35E-01 | 4.42E-01 | 3.14E-01 |
| NP_620130.2    | ALKBH8       | alkylated DNA repair protein alkB homolog 8 isoform 2                              | 1.04 | 0.98 | 1.02 | 0.95 | 5.85E-01 | 4.76E-01 | 4.50E-01 | 3.21E-01 |
| NP_054722.2    | DHX38        | pre-mRNA-splicing factor ATP-dependent RNA helicase PRP16                          | 1.04 | 0.98 | 1.01 | 1.10 | 4.95E-01 | 3.77E-01 | 5.81E-01 | 4.65E-01 |
| NP_116249.2    | LTV1         | protein LTV1 homolog isoform 1                                                     | 0.85 | 0.89 | 0.74 | 0.86 | 1.42E-01 | 6.75E-02 | 9.65E-01 | 9.50E-01 |
| NP_005819.3    | DCAF7        | DDB1- and CUL4-associated factor 7                                                 | 1.12 | 0.92 | 1.03 | 1.05 | 1.00E-01 | 3.99E-02 | 1.51E-01 | 6.10E-02 |
| NP_443183.1    | DNTTIP1      | deoxynucleotidyltransferase terminal-interacting protein 1                         | 0.74 | 0.97 | 0.71 | 0.97 | 2.09E-01 | 1.16E-01 | 2.93E-01 | 1.72E-01 |
| NP_001028740.1 | RHOT1        | mitochondrial Rho GTPase 1 isoform 1                                               | 0.99 | 1.04 | 1.03 | 1.03 | 8.97E-01 | 8.54E-01 | 7.32E-01 | 6.39E-01 |
| NP_001358323.1 | SUMO1        | small ubiquitin-related modifier 1 isoform c                                       | 0.88 | 0.97 | 0.85 | 1.06 | 1.69E-01 | 8.66E-02 | 2.50E-01 | 1.34E-01 |
| NP_005735.2    | ARIH1        | E3 ubiquitin-protein ligase ARIH1                                                  | 1.16 | 0.88 | 1.01 | 1.17 | 4.69E-01 | 3.53E-01 | 3.73E-01 | 2.46E-01 |
| NP_001333268.1 | MRRF         | ribosome-recycling factor, mitochondrial isoform 4                                 | 0.97 | 0.97 | 0.94 | 1.02 | 5.47E-01 | 4.33E-01 | 9.22E-01 | 8.88E-01 |
| NP_001357079.1 | ISG20L2      | interferon-stimulated 20 kDa exonuclease-like 2                                    | 0.94 | 1.04 | 0.97 | 1.01 | 6.26E-01 | 5.22E-01 | 5.09E-01 | 3.84E-01 |
| NP_000549.1    | HBA1         | hemoglobin subunit alpha                                                           | 1.67 | 0.76 | 1.27 | 1.40 | 1.01E-02 | 5.37E-04 | 4.07E-02 | 2.42E-03 |
| NP_005430.1    | MLF2         | myeloid leukemia factor 2                                                          | 0.98 | 0.90 | 0.87 | 1.23 | 8.59E-01 | 8.01E-01 | 7.09E-01 | 6.08E-01 |
| NP_001185883.1 | RNF103-CHMP3 | RNF103-CHMP3 protein                                                               | 1.04 | 1.04 | 1.08 | 1.12 | 2.88E-01 | 1.81E-01 | 8.63E-01 | 8.09E-01 |
| NP_060566.2    | NLE1         | notchless protein homolog 1 isoform a                                              | 1.11 | 0.94 | 1.04 | 1.10 | 3.59E-01 | 2.41E-01 | 3.74E-01 | 2.46E-01 |
| NP_054736.1    | LAMTOR2      | ragulator complex protein LAMTOR2 isoform 1                                        | 1.02 | 0.75 | 0.77 | 0.81 | 5.64E-01 | 4.54E-01 | 6.05E-02 | 9.22E-03 |
| NP_000047.1    | BCKDHB       | 2-oxoisovalerate dehydrogenase subunit beta, mitochondrial isoform 1 precursor     | 1.11 | 1.02 | 1.13 | 1.10 | 1.15E-01 | 4.89E-02 | 2.31E-01 | 1.19E-01 |

|                |          |                                                                         |      |      |      |      |          |          |          |          |
|----------------|----------|-------------------------------------------------------------------------|------|------|------|------|----------|----------|----------|----------|
| XP_005264383.1 | MPV17    | protein Mpv17 isoform X1                                                | 1.95 | 0.46 | 0.74 | 1.04 | 5.78E-01 | 4.67E-01 | 3.06E-01 | 1.82E-01 |
| NP_001012533.1 | FECH     | ferrochelatase, mitochondrial isoform a precursor                       | 1.11 | 1.01 | 1.12 | 1.12 | 1.92E-02 | 2.18E-03 | 4.79E-01 | 3.53E-01 |
| XP_006717803.1 | EBF3     | transcription factor COE3 isoform X2                                    | 1.23 | 1.01 | 1.18 | 1.33 | 6.13E-01 | 5.07E-01 | 7.12E-01 | 6.13E-01 |
| XP_011515270.2 | AGO2     | protein argonaute-2 isoform X1                                          | 1.09 | 0.94 | 1.03 | 0.95 | 1.01E-01 | 4.05E-02 | 1.76E-01 | 7.95E-02 |
| NP_057329.3    | HSD17B11 | estradiol 17-beta-dehydrogenase 11 precursor                            | 0.96 | 0.98 | 0.94 | 1.04 | 5.92E-01 | 4.84E-01 | 8.11E-01 | 7.38E-01 |
| NP_054899.2    | MRLP22   | 39S ribosomal protein L22, mitochondrial isoform a                      | 1.04 | 1.22 | 1.26 | 1.63 | 5.63E-01 | 4.52E-01 | 6.68E-01 | 5.64E-01 |
| XP_011538856.2 | SMIM12   | small integral membrane protein 12 isoform X1                           | 1.03 | 0.91 | 0.93 | 1.03 | 4.73E-01 | 3.56E-01 | 1.39E-01 | 5.33E-02 |
| NP_006799.1    | SEC61B   | protein transport protein Sec61 subunit beta                            | 1.13 | 0.91 | 1.03 | 0.98 | 8.07E-02 | 2.88E-02 | 9.33E-02 | 2.60E-02 |
| NP_008826.1    | HNMT     | histamine N-methyltransferase isoform 1                                 | 1.01 | 0.97 | 0.98 | 1.04 | 1.55E-01 | 7.62E-02 | 4.95E-01 | 3.69E-01 |
| NP_066363.1    | ZNFX1    | NFX1-type zinc finger-containing protein 1                              | 0.83 | 1.12 | 0.93 | 1.00 | 2.07E-02 | 2.53E-03 | 5.35E-02 | 6.64E-03 |
| XP_011531831.1 | RFTN1    | raftlin isoform X1                                                      | 1.26 | 0.77 | 0.99 | 1.15 | 4.35E-01 | 3.14E-01 | 2.45E-01 | 1.30E-01 |
| NP_078895.2    | FN3KRP   | ketosamine-3-kinase                                                     | 1.16 | 0.99 | 1.15 | 1.08 | 3.11E-02 | 5.23E-03 | 8.67E-02 | 2.22E-02 |
| XP_011519056.1 | ATF7IP   | activating transcription factor 7-interacting protein 1 isoform X2      | 0.89 | 0.93 | 0.83 | 0.90 | 3.89E-01 | 2.70E-01 | 8.42E-01 | 7.78E-01 |
| NP_116193.2    | ADO      | 2-aminoethanethiol dioxygenase                                          | 1.03 | 0.97 | 1.00 | 1.05 | 6.40E-01 | 5.40E-01 | 4.11E-01 | 2.82E-01 |
| NP_060295.1    | ADPRHL2  | ADP-ribose glycohydrolase ARH3                                          | 1.22 | 1.03 | 1.26 | 1.11 | 1.44E-02 | 1.22E-03 | 5.68E-02 | 7.60E-03 |
| XP_016865857.1 | EYA4     | eyes absent homolog 4 isoform X1                                        | 0.99 | 1.13 | 1.09 | 1.24 | 9.29E-01 | 8.97E-01 | 7.31E-01 | 6.38E-01 |
| NP_002446.3    | MTX1     | metaxin-1 isoform 1                                                     | 1.14 | 0.84 | 0.96 | 1.12 | 3.87E-02 | 8.06E-03 | 3.05E-01 | 1.82E-01 |
| XP_016884289.1 | ARSA     | arylsulfatase A isoform X1                                              | 0.89 | 1.08 | 0.96 | 0.97 | 2.17E-01 | 1.22E-01 | 1.36E-01 | 5.11E-02 |
| NP_055321.1    | TOR1B    | torsin-1B isoform 1 precursor                                           | 1.02 | 0.91 | 0.92 | 1.01 | 8.01E-01 | 7.31E-01 | 2.10E-01 | 1.03E-01 |
| NP_055020.1    | ZNHIT2   | zinc finger HIT domain-containing protein 2                             | 1.34 | 0.66 | 0.87 | 1.18 | 2.84E-01 | 1.78E-01 | 1.45E-01 | 5.67E-02 |
| NP_005877.2    | KATNB1   | katanin p80 WD40 repeat-containing subunit B1                           | 1.10 | 0.92 | 1.01 | 1.08 | 6.85E-02 | 2.22E-02 | 9.34E-02 | 2.60E-02 |
| NP_942600.1    | FIBP     | acidic fibroblast growth factor intracellular-binding protein isoform a | 0.92 | 1.17 | 1.06 | 1.01 | 5.03E-01 | 3.86E-01 | 4.99E-01 | 3.73E-01 |
| NP_001273501.1 | RNF40    | E3 ubiquitin-protein ligase BRE1B isoform 1                             | 0.85 | 1.12 | 0.96 | 0.92 | 2.35E-01 | 1.36E-01 | 2.01E-01 | 9.72E-02 |
| NP_001545.2    | CCN1     | CCN family member 1 precursor                                           | 1.07 | 1.01 | 1.08 | 1.23 | 3.39E-01 | 2.23E-01 | 4.91E-01 | 3.65E-01 |
| XP_011520278.1 | TLE3     | transducin-like enhancer protein 3 isoform X1                           | 1.11 | 0.91 | 1.01 | 1.03 | 3.85E-01 | 2.67E-01 | 2.34E-01 | 1.21E-01 |
| NP_065956.1    | RDH14    | retinol dehydrogenase 14                                                | 1.14 | 1.06 | 1.21 | 1.08 | 4.24E-02 | 9.58E-03 | 1.09E-01 | 3.39E-02 |
| NP_006720.1    | DIAPH2   | protein diaphanous homolog 2 isoform 156                                | 1.02 | 1.05 | 1.08 | 1.09 | 4.48E-01 | 3.28E-01 | 4.58E-01 | 3.30E-01 |
| XP_006712643.1 | GULP1    | PTB domain-containing engulfment adapter protein 1 isoform X1           | 1.03 | 0.87 | 0.89 | 1.00 | 1.03E-01 | 4.17E-02 | 2.31E-01 | 1.18E-01 |
| NP_004347.1    | CD81     | CD81 antigen isoform 1                                                  | 0.97 | 0.97 | 0.94 | 0.99 | 1.03E-01 | 4.13E-02 | 9.54E-01 | 9.34E-01 |
| NP_001159403.1 | RRM2     | ribonucleoside-diphosphate reductase subunit M2 isoform 1               | 1.40 | 0.95 | 1.26 | 1.48 | 4.91E-01 | 3.72E-01 | 4.90E-01 | 3.63E-01 |
| XP_011522644.1 | COX11    | cytochrome c oxidase assembly protein COX11, mitochondrial isoform X1   | 1.35 | 1.03 | 1.40 | 1.04 | 2.25E-02 | 2.88E-03 | 5.08E-01 | 3.83E-01 |
| NP_689929.2    | PATL1    | protein PAT1 homolog 1                                                  | 1.00 | 0.95 | 0.94 | 1.10 | 9.29E-01 | 8.98E-01 | 9.77E-01 | 9.65E-01 |
| NP_001295561.1 | POLD1    | DNA polymerase delta catalytic subunit isoform 2                        | 0.87 | 0.98 | 0.86 | 0.98 | 1.66E-02 | 1.68E-03 | 5.02E-01 | 3.76E-01 |
| NP_001002032.1 | JPT1     | jupiter microtubule associated homolog 1 isoform 2                      | 0.63 | 1.12 | 0.71 | 0.89 | 1.87E-02 | 2.09E-03 | 3.53E-02 | 1.59E-03 |
| XP_005253658.1 | RSRC2    | arginine/serine-rich coiled-coil protein 2 isoform X1                   | 0.87 | 0.94 | 0.83 | 0.77 | 5.18E-01 | 4.03E-01 | 8.28E-01 | 7.59E-01 |
| NP_056273.2    | MTMR9    | myotubularin-related protein 9                                          | 1.04 | 1.07 | 1.11 | 1.12 | 5.99E-01 | 4.93E-01 | 8.37E-01 | 7.70E-01 |
| NP_055217.2    | UQCRQ    | cytochrome b-c1 complex subunit 8                                       | 1.02 | 0.99 | 1.00 | 1.10 | 7.77E-01 | 7.00E-01 | 6.50E-01 | 5.44E-01 |
| NP_005528.4    | ING1     | inhibitor of growth protein 1 isoform D                                 | 0.94 | 0.95 | 0.89 | 1.11 | 2.26E-01 | 1.29E-01 | 9.12E-01 | 8.71E-01 |
| NP_079055.3    | PIP4K2C  | phosphatidylinositol 5-phosphate 4-kinase type-2 gamma isoform a        | 1.05 | 0.98 | 1.03 | 1.00 | 9.40E-04 | 7.49E-06 | 3.97E-01 | 2.67E-01 |
| XP_016868239.1 | CDK13    | cyclin-dependent kinase 13 isoform X1                                   | 1.11 | 1.02 | 1.12 | 1.21 | 4.49E-01 | 3.30E-01 | 5.87E-01 | 4.71E-01 |
| NP_001065243.1 | MZT1     | mitotic-spindle organizing protein 1                                    | 0.96 | 1.21 | 1.17 | 1.10 | 4.48E-01 | 3.28E-01 | 3.47E-01 | 2.20E-01 |
| NP_001973.2    | ERBB3    | receptor tyrosine-protein kinase erbB-3 isoform 1 precursor             | 1.14 | 1.12 | 1.26 | 1.03 | 9.36E-01 | 9.08E-01 | 9.29E-01 | 8.99E-01 |
| XP_011527050.1 | ADNP     | activity-dependent neuroprotector homeobox protein isoform X1           | 0.95 | 0.96 | 0.91 | 1.17 | 5.56E-01 | 4.44E-01 | 9.61E-01 | 9.43E-01 |
| NP_000128.1    | FAH      | fumarylacetoacetase                                                     | 1.43 | 0.92 | 1.32 | 1.30 | 4.21E-01 | 3.01E-01 | 3.56E-01 | 2.28E-01 |
| NP_620164.1    | CMBL     | carboxymethylenebutenolidase homolog                                    | 1.18 | 0.78 | 0.90 | 1.06 | 3.45E-01 | 2.29E-01 | 3.24E-01 | 1.99E-01 |
| NP_004214.1    | UBE2L6   | ubiquitin-ISO15-conjugating enzyme E2 L6 isoform 1                      | 0.90 | 1.05 | 0.94 | 1.08 | 1.84E-01 | 9.72E-02 | 1.34E-01 | 4.96E-02 |
| NP_001420.2    | EP300    | histone acetyltransferase p300 isoform 1                                | 1.35 | 0.67 | 0.90 | 1.43 | 2.60E-02 | 3.84E-03 | 6.08E-02 | 9.41E-03 |

|                |         |                                                                                |      |      |      |      |          |          |          |          |
|----------------|---------|--------------------------------------------------------------------------------|------|------|------|------|----------|----------|----------|----------|
| NP_001287954.2 | TJP1    | tight junction protein ZO-1 isoform c                                          | 0.95 | 1.08 | 1.03 | 1.07 | 1.85E-01 | 9.77E-02 | 1.17E-01 | 3.90E-02 |
| XP_016885171.1 | SHROOM4 | protein Shroom4 isoform X1                                                     | 0.87 | 0.78 | 0.70 | 0.98 | 5.45E-01 | 4.30E-01 | 7.60E-01 | 6.75E-01 |
| NP_004789.1    | KIF3B   | kinesin-like protein KIF3B                                                     | 0.99 | 1.02 | 1.02 | 0.90 | 4.04E-01 | 2.83E-01 | 5.63E-01 | 4.43E-01 |
| NP_001036075.1 | DBNDD1  | dysbindin domain-containing protein 1 isoform 1                                | 1.02 | 0.95 | 0.96 | 1.05 | 9.84E-01 | 9.77E-01 | 8.59E-01 | 8.03E-01 |
| NP_005919.2    | MFGE8   | lactadherin isoform a                                                          | 0.93 | 0.93 | 0.87 | 1.09 | 5.40E-01 | 4.26E-01 | 9.96E-01 | 9.95E-01 |
| NP_001243423.1 | MAN2C1  | alpha-mannosidase 2C1 isoform 2                                                | 1.16 | 0.89 | 1.02 | 1.10 | 3.36E-01 | 2.21E-01 | 3.97E-01 | 2.68E-01 |
| NP_056157.1    | PPWD1   | peptidylprolyl isomerase domain and WD repeat-containing protein 1 isoform 1   | 0.96 | 1.04 | 0.99 | 0.89 | 8.16E-01 | 7.48E-01 | 7.35E-01 | 6.43E-01 |
| XP_016874820.1 | ATF1    | cyclic AMP-dependent transcription factor ATF-1 isoform X1                     | 0.87 | 1.01 | 0.88 | 0.95 | 5.67E-02 | 1.65E-02 | 1.25E-01 | 4.38E-02 |
| NP_004658.3    | HERC2   | E3 ubiquitin-protein ligase HERC2                                              | 1.17 | 0.90 | 1.05 | 1.27 | 2.17E-01 | 1.22E-01 | 1.40E-01 | 5.39E-02 |
| NP_009151.1    | CA5B    | carbonic anhydrase 5B, mitochondrial precursor                                 | 1.15 | 1.01 | 1.15 | 1.17 | 7.53E-02 | 2.57E-02 | 6.51E-01 | 5.45E-01 |
| NP_059431.1    | CYTH2   | cytohesin-2 isoform 1                                                          | 0.88 | 1.11 | 0.98 | 1.03 | 7.24E-02 | 2.41E-02 | 2.27E-01 | 1.15E-01 |
| NP_001273540.1 | REPS1   | ralBP1-associated Eps domain-containing protein 1 isoform c                    | 1.12 | 1.15 | 1.27 | 1.12 | 3.14E-01 | 2.03E-01 | 9.78E-01 | 9.67E-01 |
| NP_001108072.1 | SZRD1   | SUZ domain-containing protein 1 isoform 1                                      | 0.86 | 0.99 | 0.86 | 0.91 | 2.05E-02 | 2.50E-03 | 9.88E-02 | 2.86E-02 |
| XP_011531021.1 | PUM2    | pumilio homolog 2 isoform X1                                                   | 1.05 | 0.92 | 0.94 | 0.93 | 8.64E-01 | 8.09E-01 | 7.14E-01 | 6.16E-01 |
| NP_002475.2    | NUBP1   | cytosolic Fe-S cluster assembly factor NUBP1 isoform 1                         | 1.05 | 1.47 | 1.59 | 1.41 | 7.79E-01 | 7.03E-01 | 5.88E-01 | 4.72E-01 |
| XP_005247145.1 | PDCD10  | programmed cell death protein 10 isoform X1                                    | 1.00 | 1.01 | 1.01 | 1.04 | 9.87E-01 | 9.82E-01 | 7.63E-01 | 6.78E-01 |
| NP_003464.1    | STAM    | signal transducing adapter molecule 1 isoform a                                | 0.91 | 1.06 | 0.95 | 1.09 | 7.42E-01 | 6.59E-01 | 6.50E-01 | 5.44E-01 |
| NP_689596.4    | DIS3L2  | DIS3-like exonuclease 2 isoform 1                                              | 1.01 | 1.05 | 1.04 | 1.04 | 9.99E-01 | 9.99E-01 | 8.68E-01 | 8.15E-01 |
| XP_011527179.1 | UQCC1   | ubiquinol-cytochrome-c reductase complex assembly factor 1 isoform X1          | 1.12 | 0.96 | 1.07 | 1.04 | 2.32E-02 | 3.08E-03 | 7.57E-02 | 1.59E-02 |
| NP_001026788.1 | COX19   | cytochrome c oxidase assembly protein COX19                                    | 0.99 | 0.94 | 0.94 | 1.21 | 9.31E-01 | 9.00E-01 | 5.73E-01 | 4.56E-01 |
| XP_016884760.1 | APOOL   | MICOS complex subunit MIC27 isoform X1                                         | 0.94 | 1.32 | 1.22 | 0.96 | 4.42E-01 | 3.22E-01 | 6.16E-01 | 5.03E-01 |
| NP_055410.1    | NT5C    | 5'(3')-deoxyribonucleotidase, cytosolic type isoform 1                         | 1.17 | 0.99 | 1.11 | 1.37 | 6.52E-01 | 5.54E-01 | 7.23E-01 | 6.25E-01 |
| XP_016856940.1 | UFC1    | ubiquitin-fold modifier-conjugating enzyme 1 isoform X1                        | 0.98 | 0.99 | 0.97 | 0.97 | 6.98E-01 | 6.08E-01 | 7.76E-01 | 6.94E-01 |
| XP_006723003.1 | TRIP10  | cdc42-interacting protein 4 isoform X1                                         | 1.08 | 0.95 | 1.02 | 0.95 | 2.06E-01 | 1.15E-01 | 1.30E-01 | 4.72E-02 |
| XP_016861031.1 | ATG7    | ubiquitin-like modifier-activating enzyme ATG7 isoform X1                      | 1.06 | 0.92 | 0.97 | 1.11 | 4.53E-01 | 3.34E-01 | 3.46E-01 | 2.19E-01 |
| NP_060366.1    | GID8    | glucose-induced degradation protein 8 homolog                                  | 0.86 | 0.98 | 0.84 | 1.01 | 2.70E-01 | 1.66E-01 | 3.74E-01 | 2.47E-01 |
| NP_055971.2    | RCOR1   | REST corepressor 1                                                             | 0.95 | 0.86 | 0.80 | 0.90 | 8.18E-01 | 7.50E-01 | 8.43E-01 | 7.80E-01 |
| NP_054796.1    | FAM32A  | protein FAM32A                                                                 | 0.77 | 0.93 | 0.72 | 1.10 | 1.13E-01 | 4.80E-02 | 1.92E-01 | 9.07E-02 |
| XP_006719243.1 | SH2B3   | SH2B adapter protein 3 isoform X6                                              | 1.19 | 0.77 | 0.91 | 1.12 | 2.39E-01 | 1.40E-01 | 1.58E-01 | 6.61E-02 |
| NP_078805.3    | CDC73   | parafibromin                                                                   | 0.98 | 0.91 | 0.89 | 0.99 | 8.39E-01 | 7.77E-01 | 5.86E-01 | 4.71E-01 |
| NP_001161339.1 | DMAC2   | distal membrane-arm assembly complex protein 2 isoform 1                       | 1.05 | 1.20 | 1.25 | 1.06 | 4.72E-01 | 3.55E-01 | 2.74E-01 | 1.54E-01 |
| XP_005245370.1 | PRCC    | proline-rich protein PRCC isoform X1                                           | 0.99 | 1.04 | 1.03 | 1.11 | 9.42E-01 | 9.16E-01 | 7.33E-01 | 6.41E-01 |
| XP_005248611.1 | ERBIN   | erbin isoform X1                                                               | 1.04 | 1.08 | 1.12 | 1.12 | 6.05E-02 | 1.83E-02 | 7.37E-01 | 6.46E-01 |
| NP_057130.1    | EXOSC1  | exosome complex component CSL4 isoform a                                       | 0.99 | 0.97 | 0.96 | 1.05 | 8.86E-01 | 8.41E-01 | 8.78E-01 | 8.28E-01 |
| NP_067041.1    | INIP    | SOSS complex subunit C isoform a                                               | 1.37 | 0.93 | 1.24 | 1.34 | 3.25E-01 | 2.11E-01 | 3.71E-01 | 2.42E-01 |
| NP_002791.1    | PSMB9   | proteasome subunit beta type-9 precursor                                       | 1.40 | 0.82 | 1.10 | 1.08 | 3.48E-01 | 2.32E-01 | 3.36E-01 | 2.10E-01 |
| NP_001273727.1 | NTMT1   | N-terminal Xaa-Pro-Lys N-methyltransferase 1 isoform a                         | 1.25 | 1.04 | 1.30 | 1.05 | 2.29E-01 | 1.32E-01 | 3.18E-01 | 1.94E-01 |
| XP_011530429.1 | BDH2    | 3-hydroxybutyrate dehydrogenase type 2 isoform X1                              | 1.03 | 1.04 | 1.08 | 1.09 | 4.69E-01 | 3.52E-01 | 8.24E-01 | 7.53E-01 |
| NP_060404.4    | PHIP    | PH-interacting protein                                                         | 1.09 | 1.02 | 1.12 | 1.10 | 1.31E-01 | 6.00E-02 | 6.13E-01 | 4.99E-01 |
| NP_001129145.1 | ATL2    | atlastin-2 isoform 2                                                           | 1.18 | 0.86 | 1.01 | 1.02 | 4.47E-02 | 1.06E-02 | 5.34E-02 | 6.29E-03 |
| XP_011543334.1 | LTBP3   | latent-transforming growth factor beta-binding protein 3 isoform X1            | 0.81 | 1.03 | 0.84 | 0.91 | 1.00E-01 | 3.98E-02 | 3.47E-01 | 2.20E-01 |
| NP_115677.2    | FBXW9   | F-box/WD repeat-containing protein 9                                           | 0.88 | 1.10 | 0.97 | 0.95 | 2.38E-01 | 1.39E-01 | 1.54E-01 | 6.29E-02 |
| XP_006712758.1 | RAPH1   | ras-associated and pleckstrin homology domains-containing protein 1 isoform X1 | 1.06 | 0.98 | 1.04 | 1.05 | 5.11E-01 | 3.95E-01 | 4.97E-01 | 3.71E-01 |
| NP_006661.1    | TPBG    | trophoblast glycoprotein precursor                                             | 1.10 | 0.92 | 1.01 | 1.07 | 1.39E-02 | 1.12E-03 | 5.53E-02 | 7.05E-03 |
| XP_024307261.1 | IRF3    | interferon regulatory factor 3 isoform X2                                      | 1.05 | 1.05 | 1.10 | 1.06 | 1.75E-01 | 9.13E-02 | 8.63E-01 | 8.10E-01 |
| NP_060354.4    | PINX1   | PIN2/TERF1-interacting telomerase inhibitor 1 isoform 1                        | 0.89 | 1.11 | 0.99 | 1.16 | 4.37E-01 | 3.17E-01 | 2.50E-01 | 1.34E-01 |
| XP_011524619.1 | PAK4    | serine/threonine-protein kinase PAK 4 isoform X1                               | 0.94 | 1.23 | 1.15 | 0.89 | 6.35E-01 | 5.32E-01 | 2.93E-01 | 1.72E-01 |

|                |             |                                                                     |      |      |      |      |          |          |          |          |
|----------------|-------------|---------------------------------------------------------------------|------|------|------|------|----------|----------|----------|----------|
| NP_009135.4    | DDX20       | probable ATP-dependent RNA helicase DDX20                           | 1.00 | 0.99 | 0.99 | 1.06 | 9.59E-01 | 9.42E-01 | 9.82E-01 | 9.74E-01 |
| NP_001005333.1 | MAGED1      | melanoma-associated antigen D1 isoform a                            | 0.95 | 1.02 | 0.97 | 0.99 | 3.77E-01 | 2.60E-01 | 3.13E-01 | 1.89E-01 |
| NP_005779.1    | PRMT3       | protein arginine N-methyltransferase 3 isoform 1                    | 1.17 | 0.97 | 1.13 | 1.12 | 5.50E-02 | 1.57E-02 | 6.43E-02 | 1.06E-02 |
| NP_006103.1    | PPIE        | peptidyl-prolyl cis-trans isomerase E isoform 1                     | 1.04 | 1.21 | 1.26 | 1.08 | 6.69E-01 | 5.72E-01 | 5.20E-01 | 3.96E-01 |
| XP_005254331.1 | GABPB1      | GA-binding protein subunit beta-1 isoform X4                        | 0.83 | 1.06 | 0.88 | 0.96 | 4.14E-02 | 9.09E-03 | 5.68E-02 | 7.60E-03 |
| XP_005266395.1 | SACS        | sacsin isoform X1                                                   | 1.35 | 0.88 | 1.21 | 1.13 | 1.43E-01 | 6.82E-02 | 2.90E-01 | 1.69E-01 |
| NP_004773.1    | SNAP29      | synaptosomal-associated protein 29                                  | 0.95 | 0.99 | 0.94 | 1.02 | 1.81E-01 | 9.52E-02 | 6.73E-01 | 5.69E-01 |
| NP_001035754.1 | PPAN-P2RY11 | PPAN-P2RY11 protein isoform 1                                       | 1.09 | 0.98 | 1.06 | 1.07 | 1.47E-01 | 7.07E-02 | 1.32E-01 | 4.85E-02 |
| NP_006388.2    | RNASEH2A    | ribonuclease H2 subunit A                                           | 1.04 | 0.89 | 0.92 | 1.04 | 5.92E-01 | 4.85E-01 | 2.00E-01 | 9.64E-02 |
| NP_060755.1    | IMP3        | U3 small nucleolar ribonucleoprotein protein IMP3                   | 1.05 | 0.98 | 1.00 | 0.91 | 8.95E-01 | 8.52E-01 | 8.59E-01 | 8.03E-01 |
| NP_001258570.1 | MTCH1       | mitochondrial carrier homolog 1 isoform PSAP-LL                     | 1.14 | 1.13 | 1.29 | 1.27 | 2.29E-02 | 2.99E-03 | 9.30E-01 | 9.01E-01 |
| NP_001135442.1 | DAXX        | death domain-associated protein 6 isoform b                         | 0.99 | 0.84 | 0.83 | 1.01 | 8.94E-01 | 8.51E-01 | 4.56E-01 | 3.28E-01 |
| XP_016856867.1 | NVL         | nuclear valosin-containing protein-like isoform X1                  | 1.16 | 0.84 | 0.96 | 0.98 | 7.14E-01 | 6.26E-01 | 4.58E-01 | 3.30E-01 |
| NP_057149.1    | MRPS16      | 28S ribosomal protein S16, mitochondrial                            | 1.06 | 1.00 | 1.07 | 1.18 | 4.25E-01 | 3.05E-01 | 7.08E-01 | 6.08E-01 |
| NP_031390.1    | TMED3       | transmembrane emp24 domain-containing protein 3 isoform a precursor | 1.10 | 0.93 | 1.03 | 1.10 | 5.05E-02 | 1.32E-02 | 9.04E-02 | 2.44E-02 |
| NP_291020.1    | SYS1        | protein SYS1 homolog isoform a                                      | 0.96 | 0.96 | 0.92 | 1.05 | 6.09E-01 | 5.04E-01 | 9.44E-01 | 9.19E-01 |
| NP_001358465.1 | FUT8        | alpha-(1,6)-fucosyltransferase isoform c                            | 1.03 | 1.13 | 1.15 | 1.04 | 4.76E-01 | 3.58E-01 | 4.63E-01 | 3.35E-01 |
| NP_054797.2    | MRPL13      | 39S ribosomal protein L13, mitochondrial                            | 0.98 | 1.01 | 0.99 | 0.96 | 7.69E-01 | 6.90E-01 | 7.30E-01 | 6.36E-01 |
| XP_006719604.1 | RBMS2       | RNA-binding motif, single-stranded-interacting protein 2 isoform X1 | 0.99 | 1.02 | 1.01 | 1.12 | 5.79E-01 | 4.69E-01 | 2.68E-01 | 1.49E-01 |
| NP_001265135.1 | SLC43A3     | solute carrier family 43 member 3 isoform 2                         | 0.98 | 1.03 | 1.01 | 0.99 | 1.29E-01 | 5.83E-02 | 3.47E-01 | 2.20E-01 |
| XP_016883913.1 | S100B       | protein S100-B isoform X1                                           | 1.09 | 1.03 | 1.12 | 0.95 | 7.23E-01 | 6.36E-01 | 8.42E-01 | 7.79E-01 |
| NP_003711.1    | PSMG1       | proteasome assembly chaperone 1 isoform a                           | 0.95 | 0.99 | 0.94 | 1.06 | 2.01E-01 | 1.10E-01 | 2.75E-01 | 1.55E-01 |
| NP_694992.2    | LRRC57      | leucine-rich repeat-containing protein 57                           | 1.02 | 0.97 | 0.99 | 1.05 | 5.53E-03 | 1.81E-04 | 8.89E-02 | 2.33E-02 |
| NP_689822.2    | CNST        | consortin isoform 1                                                 | 1.25 | 0.80 | 0.97 | 1.10 | 5.56E-01 | 4.44E-01 | 3.94E-01 | 2.65E-01 |
| NP_060052.3    | UBE2Q1      | ubiquitin-conjugating enzyme E2 Q1                                  | 1.02 | 1.02 | 1.05 | 1.03 | 4.41E-02 | 1.03E-02 | 9.45E-01 | 9.20E-01 |
| NP_003293.2    | TRIP6       | thyroid receptor-interacting protein 6                              | 1.09 | 1.08 | 1.13 | 1.17 | 7.89E-01 | 7.14E-01 | 9.58E-01 | 9.40E-01 |
| XP_011532279.1 | ROBO1       | roundabout homolog 1 isoform X1                                     | 1.36 | 0.76 | 0.88 | 1.13 | 9.37E-01 | 9.10E-01 | 7.37E-01 | 6.47E-01 |
| NP_001006640.1 | TCEAL1      | transcription elongation factor A protein-like 1                    | 0.70 | 0.98 | 0.68 | 0.92 | 1.35E-02 | 1.04E-03 | 3.53E-02 | 1.74E-03 |
| NP_009017.1    | WDHD1       | WD repeat and HMG-box DNA-binding protein 1 isoform 1               | 0.99 | 1.00 | 0.99 | 0.99 | 8.10E-02 | 2.90E-02 | 7.25E-01 | 6.28E-01 |
| NP_004283.2    | RIN1        | ras and Rab interactor 1 isoform 1                                  | 0.77 | 1.13 | 0.88 | 1.27 | 4.72E-03 | 1.34E-04 | 3.93E-01 | 2.64E-01 |
| NP_071935.1    | POLR1E      | DNA-directed RNA polymerase I subunit RPA49 isoform 1               | 0.93 | 1.11 | 1.03 | 1.29 | 5.54E-01 | 4.41E-01 | 2.78E-01 | 1.58E-01 |
| NP_443730.1    | GNB1L       | guanine nucleotide-binding protein subunit beta-like protein 1      | 1.06 | 0.94 | 0.99 | 1.05 | 5.86E-01 | 4.77E-01 | 4.01E-01 | 2.71E-01 |
| NP_689821.3    | SDE2        | replication stress response regulator SDE2                          | 0.94 | 1.01 | 0.94 | 1.11 | 5.17E-01 | 4.01E-01 | 5.35E-01 | 4.12E-01 |
| NP_005859.1    | BET1        | BET1 homolog isoform 1                                              | 1.05 | 1.05 | 1.10 | 1.05 | 7.28E-01 | 6.41E-01 | 9.54E-01 | 9.34E-01 |
| XP_006710865.2 | ABCD3       | ATP-binding cassette sub-family D member 3 isoform X1               | 1.22 | 0.84 | 1.02 | 1.15 | 8.02E-02 | 2.84E-02 | 6.03E-02 | 9.16E-03 |
| NP_001633.1    | APLP2       | amyloid-like protein 2 isoform 1 precursor                          | 1.23 | 0.79 | 0.96 | 1.00 | 3.97E-01 | 2.76E-01 | 1.97E-01 | 9.44E-02 |
| NP_000584.2    | TAP1        | antigen peptide transporter 1 isoform 1                             | 1.19 | 0.97 | 1.15 | 1.05 | 3.39E-02 | 6.32E-03 | 1.27E-01 | 4.46E-02 |
| NP_074036.1    | CBFB        | core-binding factor subunit beta isoform 1                          | 0.97 | 0.97 | 0.94 | 1.04 | 6.77E-01 | 5.81E-01 | 9.77E-01 | 9.64E-01 |
| NP_997717.2    | BOLA3       | bolaA-like protein 3 isoform 1                                      | 0.83 | 1.08 | 0.90 | 0.92 | 1.97E-01 | 1.08E-01 | 1.55E-01 | 6.37E-02 |
| NP_001073970.1 | TMEM223     | transmembrane protein 223                                           | 1.15 | 1.02 | 1.18 | 1.27 | 9.56E-02 | 3.70E-02 | 4.09E-01 | 2.80E-01 |
| NP_060347.2    | SLC35F6     | solute carrier family 35 member F6 precursor                        | 1.05 | 1.13 | 1.18 | 1.19 | 6.79E-01 | 5.84E-01 | 5.23E-01 | 3.99E-01 |
| NP_001340434.1 | INTS10      | integrator complex subunit 10 isoform a                             | 0.78 | 1.04 | 0.81 | 0.95 | 5.95E-02 | 1.79E-02 | 1.81E-01 | 8.29E-02 |
| XP_024306409.1 | ERBB2       | receptor tyrosine-protein kinase erbB-2 isoform X1                  | 1.47 | 0.92 | 1.26 | 1.35 | 5.70E-01 | 4.60E-01 | 5.28E-01 | 4.06E-01 |
| NP_079120.1    | NUP85       | nuclear pore complex protein Nup85 isoform 1                        | 0.91 | 0.97 | 0.88 | 0.92 | 2.19E-01 | 1.24E-01 | 5.91E-01 | 4.76E-01 |
| NP_001316671.1 | DPCD        | protein DPCD isoform 1                                              | 1.12 | 0.86 | 0.96 | 1.08 | 3.54E-01 | 2.37E-01 | 2.43E-01 | 1.28E-01 |
| XP_011510350.1 | TANC1       | protein TANC1 isoform X2                                            | 1.64 | 0.85 | 1.33 | 1.35 | 1.72E-01 | 8.87E-02 | 2.90E-01 | 1.69E-01 |
| NP_660344.2    | TVP23C      | Golgi apparatus membrane protein TVP23 homolog C isoform 1          | 1.15 | 1.07 | 1.24 | 1.13 | 1.35E-01 | 6.24E-02 | 3.18E-01 | 1.94E-01 |

|                |          |                                                                      |      |      |      |      |          |          |          |          |
|----------------|----------|----------------------------------------------------------------------|------|------|------|------|----------|----------|----------|----------|
| NP_001335456.1 | KNOP1    | lysine-rich nucleolar protein 1 isoform a                            | 0.80 | 1.20 | 0.95 | 0.90 | 6.50E-02 | 2.05E-02 | 1.96E-01 | 9.41E-02 |
| NP_055557.2    | TM9SF4   | transmembrane 9 superfamily member 4 isoform 1 precursor             | 1.11 | 0.95 | 1.05 | 1.06 | 4.06E-02 | 8.86E-03 | 3.27E-01 | 2.03E-01 |
| NP_150596.1    | SEC11C   | signal peptidase complex catalytic subunit SEC11C isoform 1          | 0.96 | 1.05 | 1.01 | 1.23 | 6.60E-01 | 5.63E-01 | 4.30E-01 | 3.02E-01 |
| NP_004702.2    | SYNGR1   | synaptogyrin-1 isoform 1a                                            | 1.08 | 1.05 | 1.13 | 1.11 | 7.30E-02 | 2.44E-02 | 3.63E-01 | 2.35E-01 |
| NP_001854.1    | COX6B1   | cytochrome c oxidase subunit 6B1                                     | 0.87 | 0.97 | 0.85 | 1.14 | 3.19E-02 | 5.58E-03 | 1.27E-01 | 4.55E-02 |
| NP_077309.1    | FSD1     | fibronectin type III and SPRY domain-containing protein 1 isoform 1  | 0.82 | 1.06 | 0.85 | 1.04 | 3.69E-01 | 2.52E-01 | 4.20E-01 | 2.92E-01 |
| XP_016882067.1 | CCDC9    | coiled-coil domain-containing protein 9 isoform X1                   | 0.87 | 1.05 | 0.91 | 0.97 | 5.95E-03 | 2.01E-04 | 3.31E-02 | 3.99E-04 |
| NP_757345.2    | TAPBP    | tapasin isoform 2 precursor                                          | 1.04 | 1.15 | 1.19 | 1.03 | 9.06E-01 | 8.65E-01 | 6.58E-01 | 5.52E-01 |
| NP_009006.2    | WDR45    | WD repeat domain phosphoinositide-interacting protein 4 isoform 1    | 1.03 | 1.04 | 1.08 | 1.12 | 7.11E-01 | 6.23E-01 | 9.12E-01 | 8.71E-01 |
| NP_001129101.1 | PPP1R21  | protein phosphatase 1 regulatory subunit 21 isoform 1                | 1.17 | 0.91 | 1.07 | 1.13 | 3.21E-01 | 2.09E-01 | 2.31E-01 | 1.18E-01 |
| NP_115710.2    | UTP23    | rRNA-processing protein UTP23 homolog                                | 1.02 | 1.06 | 1.09 | 1.05 | 3.68E-01 | 2.50E-01 | 4.29E-01 | 3.01E-01 |
| XP_011526347.1 | MRPL4    | 39S ribosomal protein L4, mitochondrial isoform X1                   | 1.37 | 0.90 | 1.19 | 1.20 | 4.84E-01 | 3.67E-01 | 4.32E-01 | 3.04E-01 |
| NP_115700.1    | NTPCR    | cancer-related nucleoside-triphosphatase isoform 1                   | 1.07 | 0.97 | 1.04 | 1.06 | 1.35E-01 | 6.28E-02 | 2.00E-01 | 9.65E-02 |
| NP_001164977.1 | MCFD2    | multiple coagulation factor deficiency protein 2 isoform A precursor | 0.79 | 1.05 | 0.83 | 0.92 | 4.71E-02 | 1.16E-02 | 5.79E-02 | 7.97E-03 |
| NP_004228.1    | TRIP13   | pachytene checkpoint protein 2 homolog isoform 1                     | 1.77 | 0.64 | 1.05 | 1.12 | 3.40E-01 | 2.24E-01 | 2.49E-01 | 1.33E-01 |
| NP_006801.1    | PDIA5    | protein disulfide-isomerase A5 precursor                             | 1.03 | 0.94 | 0.97 | 1.01 | 6.92E-01 | 6.00E-01 | 3.74E-01 | 2.47E-01 |
| NP_001138749.1 | NECAP2   | adaptin ear-binding coat-associated protein 2 isoform 2              | 0.79 | 1.07 | 0.83 | 1.00 | 2.17E-01 | 1.23E-01 | 3.59E-01 | 2.31E-01 |
| NP_001034761.1 | YIF1B    | protein YIF1B isoform 5                                              | 0.73 | 1.27 | 0.88 | 0.91 | 4.19E-01 | 2.98E-01 | 3.66E-01 | 2.38E-01 |
| NP_002425.2    | MPG      | DNA-3-methyladenine glycosylase isoform a                            | 0.96 | 0.98 | 0.94 | 1.07 | 7.91E-01 | 7.18E-01 | 8.74E-01 | 8.22E-01 |
| NP_060238.3    | LRRC40   | leucine-rich repeat-containing protein 40                            | 1.07 | 1.00 | 1.07 | 0.98 | 2.45E-02 | 3.40E-03 | 9.12E-02 | 2.49E-02 |
| XP_011508525.1 | RABGAP1L | rab GTPase-activating protein 1-like isoform X1                      | 1.04 | 0.94 | 0.97 | 1.07 | 8.45E-01 | 7.84E-01 | 6.29E-01 | 5.17E-01 |
| XP_016868249.1 | BUD31    | protein BUD31 homolog isoform X1                                     | 0.97 | 1.06 | 1.04 | 1.09 | 8.15E-01 | 7.47E-01 | 5.01E-01 | 3.76E-01 |
| XP_016869077.1 | PDP1     | pyruvate dehydrogenase phosphatase catalytic subunit 1 isoform X1    | 1.19 | 0.99 | 1.19 | 1.07 | 3.70E-02 | 7.41E-03 | 2.19E-01 | 1.10E-01 |
| XP_011524725.1 | AP2S1    | AP-2 complex subunit sigma isoform X1                                | 1.17 | 0.83 | 0.97 | 1.05 | 6.22E-02 | 1.91E-02 | 4.75E-02 | 4.13E-03 |
| NP_001002296.1 | GOLGA7   | golgin subfamily A member 7 isoform a                                | 1.10 | 0.99 | 1.08 | 1.06 | 3.62E-01 | 2.44E-01 | 3.42E-01 | 2.15E-01 |
| NP_000259.1    | NF2      | merlin isoform 1                                                     | 1.04 | 0.93 | 0.97 | 1.10 | 4.07E-01 | 2.87E-01 | 2.31E-01 | 1.18E-01 |
| NP_055109.1    | TRAM1    | translocating chain-associated membrane protein 1 isoform 1          | 1.11 | 1.02 | 1.14 | 1.06 | 1.22E-03 | 1.07E-05 | 2.38E-01 | 1.24E-01 |
| NP_057033.2    | GET4     | Golgi to ER traffic protein 4 homolog                                | 1.16 | 0.77 | 0.87 | 1.05 | 7.70E-01 | 6.92E-01 | 4.18E-01 | 2.91E-01 |
| NP_001036100.1 | NGDN     | neuroguidin isoform 1                                                | 1.05 | 0.97 | 1.02 | 0.99 | 1.65E-01 | 8.38E-02 | 1.23E-01 | 4.27E-02 |
| XP_006714694.1 | GPX8     | probable glutathione peroxidase 8 isoform X1                         | 0.96 | 0.79 | 0.76 | 1.10 | 2.78E-01 | 1.73E-01 | 1.38E-01 | 5.26E-02 |
| NP_060692.3    | PARVA    | alpha-parvin                                                         | 0.96 | 0.98 | 0.94 | 0.93 | 4.15E-01 | 2.95E-01 | 7.14E-01 | 6.16E-01 |
| NP_004744.2    | DHRS3    | short-chain dehydrogenase/reductase 3 isoform 1                      | 1.40 | 0.86 | 1.22 | 0.99 | 1.68E-01 | 8.59E-02 | 1.59E-01 | 6.70E-02 |
| NP_001257624.1 | ARHGAP12 | rho GTPase-activating protein 12 isoform 2                           | 1.15 | 0.92 | 1.04 | 1.04 | 5.17E-01 | 4.01E-01 | 5.24E-01 | 4.01E-01 |
| XP_024309756.1 | FRYL     | protein furry homolog-like isoform X1                                | 0.96 | 1.03 | 0.99 | 0.98 | 2.57E-01 | 1.55E-01 | 1.70E-01 | 7.42E-02 |
| NP_004281.1    | RNF14    | E3 ubiquitin-protein ligase RNF14 isoform 1                          | 1.12 | 0.96 | 1.05 | 1.62 | 6.96E-01 | 6.05E-01 | 6.22E-01 | 5.09E-01 |
| NP_056651.1    | WARS2    | tryptophan--tRNA ligase, mitochondrial isoform 1 precursor           | 1.09 | 0.90 | 0.97 | 1.05 | 5.75E-01 | 4.64E-01 | 3.66E-01 | 2.38E-01 |
| NP_055452.3    | MTFR1    | mitochondrial fission regulator 1 isoform 1                          | 1.23 | 0.82 | 1.00 | 1.29 | 1.85E-01 | 9.79E-02 | 2.19E-01 | 1.09E-01 |
| XP_005266361.1 | ZC3H13   | zinc finger CCCH domain-containing protein 13 isoform X1             | 0.94 | 1.05 | 0.98 | 1.12 | 4.62E-01 | 3.43E-01 | 3.24E-01 | 1.99E-01 |
| NP_005460.2    | ACOT8    | acyl-coenzyme A thioesterase 8                                       | 1.10 | 0.91 | 1.01 | 1.06 | 1.73E-01 | 8.95E-02 | 1.05E-01 | 3.20E-02 |
| NP_003100.1    | SP1      | transcription factor Sp1 isoform b                                   | 1.01 | 1.07 | 1.05 | 0.95 | 9.74E-01 | 9.61E-01 | 8.57E-01 | 7.99E-01 |
| XP_016870293.1 | SPOUT1   | putative methyltransferase C9orf14 isoform X1                        | 1.02 | 1.06 | 1.08 | 1.10 | 6.50E-01 | 5.51E-01 | 4.86E-01 | 3.59E-01 |
| NP_077297.2    | RBM42    | RNA-binding protein 42 isoform 1                                     | 0.92 | 1.01 | 0.94 | 1.25 | 2.44E-01 | 1.43E-01 | 3.26E-01 | 2.01E-01 |
| XP_005256724.1 | GEMIN4   | gem-associated protein 4 isoform X1                                  | 1.35 | 0.77 | 0.95 | 1.07 | 5.50E-01 | 4.36E-01 | 4.49E-01 | 3.20E-01 |
| NP_078954.4    | NARS2    | probable asparagine--tRNA ligase, mitochondrial isoform 1 precursor  | 1.03 | 0.85 | 0.87 | 0.99 | 8.59E-01 | 8.02E-01 | 2.79E-01 | 1.59E-01 |
| NP_001091991.1 | HTATIP2  | oxidoreductase HTATIP2 isoform b                                     | 1.08 | 1.15 | 1.24 | 1.23 | 5.19E-01 | 4.05E-01 | 6.09E-01 | 4.94E-01 |
| XP_006718715.1 | RAD9A    | cell cycle checkpoint control protein RAD9A isoform X1               | 1.00 | 0.99 | 0.99 | 1.08 | 9.45E-01 | 9.22E-01 | 9.19E-01 | 8.82E-01 |
| NP_055486.2    | UBE3C    | ubiquitin-protein ligase E3C                                         | 0.98 | 0.90 | 0.88 | 1.03 | 7.84E-01 | 7.08E-01 | 3.93E-01 | 2.64E-01 |

|                |         |                                                                              |      |      |      |      |          |          |          |          |
|----------------|---------|------------------------------------------------------------------------------|------|------|------|------|----------|----------|----------|----------|
| NP_001229783.1 | ARFIP2  | arfaptin-2 isoform 1                                                         | 1.21 | 0.89 | 1.07 | 1.12 | 2.27E-01 | 1.30E-01 | 1.41E-01 | 5.47E-02 |
| NP_055871.1    | RRP1B   | ribosomal RNA processing protein 1 homolog B                                 | 1.10 | 1.07 | 1.17 | 1.42 | 3.67E-01 | 2.49E-01 | 8.62E-01 | 8.07E-01 |
| NP_653210.2    | CCDC43  | coiled-coil domain-containing protein 43 isoform 1                           | 0.90 | 1.15 | 1.03 | 1.02 | 2.91E-01 | 1.83E-01 | 1.37E-01 | 5.15E-02 |
| NP_057688.3    | KDM3B   | lysine-specific demethylase 3B                                               | 0.82 | 0.95 | 0.78 | 1.07 | 1.03E-01 | 4.15E-02 | 3.13E-01 | 1.89E-01 |
| XP_005263429.1 | LRBA    | lipopolysaccharide-responsive and beige-like anchor protein isoform X1       | 1.01 | 0.99 | 1.01 | 1.07 | 9.87E-01 | 9.82E-01 | 9.42E-01 | 9.15E-01 |
| NP_006570.1    | EBP     | 3-beta-hydroxysteroid-Delta(8),Delta(7)-isomerase                            | 1.17 | 1.00 | 1.12 | 1.26 | 5.68E-01 | 4.58E-01 | 7.15E-01 | 6.17E-01 |
| NP_055929.1    | ANKLE2  | ankyrin repeat and LEM domain-containing protein 2                           | 1.06 | 0.87 | 0.92 | 1.08 | 2.27E-01 | 1.30E-01 | 1.22E-01 | 4.22E-02 |
| NP_001601.1    | ACP2    | lysosomal acid phosphatase isoform 1 precursor                               | 0.80 | 1.21 | 0.97 | 1.02 | 1.18E-01 | 5.15E-02 | 1.27E-01 | 4.56E-02 |
| XP_011507962.1 | ODR4    | protein odr-4 homolog isoform X1                                             | 1.00 | 0.96 | 0.96 | 0.97 | 8.99E-01 | 8.57E-01 | 7.55E-01 | 6.69E-01 |
| NP_054905.2    | COMMD9  | COMM domain-containing protein 9 isoform 1                                   | 1.09 | 0.99 | 1.08 | 1.20 | 3.61E-02 | 7.05E-03 | 7.05E-01 | 6.05E-01 |
| NP_055209.2    | GHITM   | growth hormone-inducible transmembrane protein                               | 1.11 | 1.00 | 1.11 | 1.17 | 7.64E-02 | 2.64E-02 | 1.45E-01 | 5.68E-02 |
| XP_011537724.1 | DOCK1   | dedicator of cytokinesis protein 1 isoform X1                                | 0.90 | 1.15 | 1.03 | 0.98 | 3.77E-01 | 2.59E-01 | 1.90E-01 | 8.94E-02 |
| XP_024304514.1 | MADD    | MAP kinase-activating death domain protein isoform X2                        | 0.85 | 1.49 | 1.23 | 1.21 | 3.97E-01 | 2.77E-01 | 2.84E-01 | 1.62E-01 |
| XP_016866335.1 | CEP85L  | centrosomal protein of 85 kDa-like isoform X1                                | 0.99 | 1.07 | 1.06 | 1.04 | 6.73E-01 | 5.77E-01 | 1.51E-01 | 6.07E-02 |
| XP_011521908.1 | CYBC1   | cytochrome b-245 chaperone 1 isoform X1                                      | 1.29 | 0.84 | 1.04 | 1.08 | 4.61E-01 | 3.42E-01 | 4.13E-01 | 2.84E-01 |
| XP_024305360.1 | MIA2    | melanoma inhibitory activity protein 2 isoform X1                            | 1.09 | 1.03 | 1.13 | 1.12 | 2.65E-01 | 1.61E-01 | 7.38E-01 | 6.48E-01 |
| NP_001077362.1 | STRN3   | striatin-3 isoform 1                                                         | 1.23 | 1.09 | 1.34 | 1.53 | 3.91E-02 | 8.33E-03 | 5.65E-01 | 4.45E-01 |
| NP_005754.2    | AASS    | alpha-aminoadipic semialdehyde synthase, mitochondrial                       | 1.06 | 0.94 | 1.00 | 1.22 | 3.89E-02 | 8.16E-03 | 2.09E-01 | 1.02E-01 |
| NP_004413.1    | DVL2    | segment polarity protein dishevelled homolog DVL-2                           | 1.04 | 0.91 | 0.94 | 1.10 | 5.95E-01 | 4.88E-01 | 2.47E-01 | 1.31E-01 |
| NP_001008389.1 | CISD2   | CDGSH iron-sulfur domain-containing protein 2                                | 1.06 | 1.10 | 1.17 | 0.92 | 5.66E-02 | 1.64E-02 | 8.44E-01 | 7.81E-01 |
| NP_060834.2    | RSBN1   | lysine-specific demethylase 9                                                | 1.12 | 0.81 | 0.90 | 1.04 | 3.08E-01 | 1.97E-01 | 1.73E-01 | 7.65E-02 |
| XP_006715197.1 | MRPS18A | 39S ribosomal protein S18a, mitochondrial isoform X1                         | 0.99 | 1.01 | 1.00 | 1.05 | 4.14E-01 | 2.93E-01 | 4.88E-01 | 3.61E-01 |
| NP_001358366.1 | AGPAT1  | 1-acyl-sn-glycerol-3-phosphate acyltransferase alpha isoform 2               | 1.23 | 0.83 | 1.02 | 1.13 | 8.10E-02 | 2.89E-02 | 8.79E-02 | 2.28E-02 |
| NP_078975.2    | ZFAND1  | AN1-type zinc finger protein 1 isoform a                                     | 1.27 | 0.77 | 0.93 | 1.09 | 4.97E-01 | 3.79E-01 | 3.93E-01 | 2.64E-01 |
| NP_071409.3    | LHPP    | phospholysine phosphohistidine inorganic pyrophosphate phosphatase isoform 1 | 0.85 | 0.79 | 0.67 | 0.83 | 4.04E-01 | 2.83E-01 | 7.87E-01 | 7.09E-01 |
| NP_073570.1    | SMAP2   | stromal membrane-associated protein 2 isoform 1                              | 0.91 | 1.13 | 1.03 | 0.95 | 2.36E-01 | 1.38E-01 | 1.74E-01 | 7.71E-02 |
| XP_011543605.1 | SYVN1   | E3 ubiquitin-protein ligase synoviolin isoform X1                            | 1.04 | 0.94 | 0.98 | 1.06 | 4.12E-03 | 1.01E-04 | 6.60E-02 | 1.13E-02 |
| NP_005179.2    | CBL     | E3 ubiquitin-protein ligase CBL                                              | 1.10 | 0.96 | 1.05 | 1.18 | 5.05E-01 | 3.88E-01 | 4.25E-01 | 2.97E-01 |
| XP_024307330.1 | CC2D1A  | coiled-coil and C2 domain-containing protein 1A isoform X1                   | 1.02 | 1.11 | 1.13 | 1.12 | 8.70E-01 | 8.17E-01 | 4.91E-01 | 3.65E-01 |
| NP_001139748.2 | NCEH1   | neutral cholesterol ester hydrolase 1 isoform a                              | 0.94 | 1.37 | 1.23 | 1.28 | 7.09E-01 | 6.20E-01 | 5.01E-01 | 3.75E-01 |
| NP_001357137.1 | FBXL20  | F-box/LRR-repeat protein 20 isoform 3                                        | 1.13 | 0.91 | 1.03 | 1.05 | 1.17E-02 | 7.74E-04 | 5.00E-02 | 5.05E-03 |
| NP_005810.1    | STX6    | syntaxin-6 isoform 1                                                         | 1.01 | 0.76 | 0.77 | 0.90 | 9.68E-01 | 9.53E-01 | 2.70E-01 | 1.51E-01 |
| XP_005257833.1 | SCRN2   | secernin-2 isoform X1                                                        | 1.03 | 1.03 | 1.06 | 1.10 | 4.23E-01 | 3.04E-01 | 9.12E-01 | 8.72E-01 |
| NP_957718.1    | NRP2    | neuropilin-2 isoform 1 precursor                                             | 1.05 | 1.03 | 1.09 | 1.01 | 2.71E-01 | 1.68E-01 | 6.39E-01 | 5.28E-01 |
| NP_001332814.1 | DCAF16  | DDB1- and CUL4-associated factor 16                                          | 1.03 | 0.87 | 0.89 | 1.07 | 7.49E-01 | 6.68E-01 | 5.39E-01 | 4.17E-01 |
| NP_114401.2    | TMEM245 | transmembrane protein 245                                                    | 1.49 | 0.75 | 0.99 | 1.13 | 5.79E-01 | 4.69E-01 | 4.41E-01 | 3.12E-01 |
| XP_005261628.1 | DES11   | desumoylating isopeptidase 1 isoform X1                                      | 0.88 | 0.85 | 0.76 | 1.11 | 3.97E-01 | 2.77E-01 | 8.95E-01 | 8.48E-01 |
| XP_024306499.1 | GIT1    | ARF GTPase-activating protein GIT1 isoform X1                                | 1.15 | 0.80 | 0.92 | 1.23 | 3.52E-01 | 2.35E-01 | 1.36E-01 | 5.08E-02 |
| XP_024302365.1 | WTAP    | pre-mRNA-splicing regulator WTAP isoform X2                                  | 0.96 | 0.99 | 0.95 | 1.08 | 7.44E-01 | 6.61E-01 | 8.44E-01 | 7.81E-01 |
| NP_003052.2    | SLIT1   | slit homolog 1 protein precursor                                             | 0.96 | 1.04 | 1.00 | 1.11 | 5.95E-02 | 1.79E-02 | 8.47E-02 | 2.07E-02 |
| NP_001248353.1 | PPP1R1C | protein phosphatase 1 regulatory subunit 1C isoform 1                        | 0.96 | 0.86 | 0.82 | 0.97 | 3.87E-02 | 8.04E-03 | 3.15E-01 | 1.91E-01 |
| NP_003029.2    | SLC1A4  | neutral amino acid transporter A isoform 1                                   | 1.02 | 1.06 | 1.08 | 1.11 | 5.10E-01 | 3.94E-01 | 6.22E-01 | 5.10E-01 |
| XP_024307388.1 | RCN3    | reticulocalbin-3 isoform X1                                                  | 0.79 | 1.09 | 0.86 | 0.89 | 1.28E-03 | 1.20E-05 | 5.35E-02 | 6.41E-03 |
| NP_057055.2    | MRPS7   | 28S ribosomal protein S7, mitochondrial                                      | 1.01 | 0.96 | 0.97 | 1.10 | 9.26E-01 | 8.93E-01 | 6.48E-01 | 5.41E-01 |
| NP_660304.1    | DNAJC19 | mitochondrial import inner membrane translocase subunit TIM14 isoform 1      | 0.97 | 1.06 | 1.02 | 0.89 | 8.80E-01 | 8.32E-01 | 7.62E-01 | 6.77E-01 |
| XP_011526467.1 | RFX1    | MHC class II regulatory factor RFX1 isoform X1                               | 1.17 | 0.90 | 1.05 | 1.09 | 3.11E-01 | 1.99E-01 | 2.19E-01 | 1.10E-01 |
| NP_112594.1    | DOHH    | deoxyhypusine hydroxylase                                                    | 1.09 | 0.88 | 0.96 | 1.64 | 8.55E-01 | 7.96E-01 | 5.91E-01 | 4.77E-01 |

|                |             |                                                                                  |      |      |      |      |          |          |          |          |
|----------------|-------------|----------------------------------------------------------------------------------|------|------|------|------|----------|----------|----------|----------|
| NP_036591.3    | TIMM8B      | mitochondrial import inner membrane translocase subunit Tim8 B                   | 0.82 | 1.04 | 0.85 | 1.00 | 6.84E-02 | 2.21E-02 | 1.96E-01 | 9.38E-02 |
| XP_024308643.1 | INPP1       | inositol polyphosphate 1-phosphatase isoform X1                                  | 1.22 | 0.90 | 1.10 | 1.03 | 7.43E-02 | 2.51E-02 | 2.66E-01 | 1.48E-01 |
| NP_001001433.1 | STX16       | syntaxin-16 isoform a                                                            | 0.98 | 1.17 | 1.15 | 0.97 | 6.57E-03 | 2.48E-04 | 3.86E-01 | 2.57E-01 |
| NP_001836.3    | COL4A1      | collagen alpha-1(IV) chain isoform 1                                             | 0.89 | 0.99 | 0.85 | 0.92 | 6.92E-01 | 5.99E-01 | 8.02E-01 | 7.27E-01 |
| XP_024303525.1 | TACC2       | transforming acidic coiled-coil-containing protein 2 isoform X1                  | 0.80 | 0.92 | 0.74 | 0.85 | 2.20E-01 | 1.25E-01 | 4.27E-01 | 2.99E-01 |
| NP_004996.1    | NDUFB9      | NADH dehydrogenase [ubiquinone] 1 beta subcomplex subunit 9 isoform 1            | 0.98 | 0.97 | 0.95 | 0.99 | 7.08E-01 | 6.18E-01 | 9.19E-01 | 8.81E-01 |
| XP_024308903.1 | C2orf49     | ashwin isoform X1                                                                | 0.79 | 1.13 | 0.89 | 0.89 | 8.40E-03 | 3.91E-04 | 2.72E-02 | 1.95E-04 |
| XP_005258776.1 | LSM14A      | protein LSM14 homolog A isoform X1                                               | 0.95 | 0.92 | 0.88 | 1.03 | 3.37E-01 | 2.21E-01 | 6.34E-01 | 5.23E-01 |
| NP_569711.2    | COL18A1     | collagen alpha-1(XVIII) chain isoform 3                                          | 0.70 | 0.93 | 0.60 | 0.68 | 4.45E-01 | 3.24E-01 | 6.71E-01 | 5.66E-01 |
| NP_998725.1    | PKN1        | serine/threonine-protein kinase N1 isoform 1                                     | 1.11 | 0.98 | 1.07 | 1.07 | 6.59E-01 | 5.61E-01 | 6.62E-01 | 5.57E-01 |
| NP_073582.3    | ATPAF1      | ATP synthase mitochondrial F1 complex assembly factor 1 isoform 1 precursor      | 1.10 | 0.62 | 0.65 | 1.03 | 6.81E-01 | 5.87E-01 | 4.14E-01 | 2.86E-01 |
| NP_001284487.1 | RPA2        | replication protein A 32 kDa subunit isoform 3                                   | 1.05 | 1.01 | 1.06 | 0.99 | 1.00E-01 | 4.01E-02 | 1.74E-01 | 7.69E-02 |
| NP_060024.2    | PARP14      | protein mono-ADP-ribosyltransferase PARP14                                       | 1.16 | 0.82 | 0.92 | 1.13 | 7.62E-01 | 6.82E-01 | 5.08E-01 | 3.82E-01 |
| XP_011544166.1 | LCMT1       | leucine carboxyl methyltransferase 1 isoform X1                                  | 1.03 | 1.05 | 1.08 | 1.07 | 5.95E-02 | 1.79E-02 | 4.70E-01 | 3.43E-01 |
| NP_115515.2    | ANKRD27     | ankyrin repeat domain-containing protein 27                                      | 1.15 | 1.01 | 1.17 | 1.29 | 1.04E-01 | 4.21E-02 | 6.97E-01 | 5.95E-01 |
| XP_024308581.1 | IAH1        | isoamyl acetate-hydrolyzing esterase 1 homolog isoform X1                        | 1.05 | 1.00 | 1.05 | 0.97 | 1.07E-02 | 6.60E-04 | 5.17E-01 | 3.93E-01 |
| NP_003250.3    | ICAM5       | intercellular adhesion molecule 5 precursor                                      | 0.81 | 1.26 | 1.00 | 0.99 | 1.47E-01 | 7.09E-02 | 4.06E-01 | 2.76E-01 |
| NP_064711.1    | PDXP        | pyridoxal phosphate phosphatase                                                  | 0.88 | 1.05 | 0.92 | 0.98 | 6.20E-02 | 1.89E-02 | 1.17E-01 | 3.93E-02 |
| NP_006414.2    | RABAC1      | prenylated Rab acceptor protein 1                                                | 0.99 | 1.00 | 0.99 | 1.10 | 8.75E-01 | 8.24E-01 | 8.74E-01 | 8.22E-01 |
| NP_001713.2    | POLR3D      | DNA-directed RNA polymerase III subunit RPC4                                     | 1.11 | 0.93 | 1.03 | 1.11 | 2.68E-01 | 1.64E-01 | 1.73E-01 | 7.67E-02 |
| XP_005265912.1 | FBXW11      | F-box/WD repeat-containing protein 11 isoform X1                                 | 1.29 | 0.80 | 0.96 | 1.39 | 6.96E-01 | 6.05E-01 | 5.11E-01 | 3.87E-01 |
| NP_057300.2    | DBR1        | lariat debranching enzyme                                                        | 1.10 | 0.87 | 0.96 | 1.07 | 1.53E-01 | 7.49E-02 | 8.57E-02 | 2.15E-02 |
| NP_001333154.1 | WDR48       | WD repeat-containing protein 48 isoform 4                                        | 0.89 | 0.96 | 0.82 | 1.01 | 7.16E-01 | 6.29E-01 | 8.49E-01 | 7.87E-01 |
| NP_001030177.1 | C18orf32    | UPF0729 protein C18orf32                                                         | 1.09 | 1.14 | 1.24 | 1.20 | 4.05E-02 | 8.82E-03 | 8.42E-01 | 7.78E-01 |
| NP_001108225.1 | ENG         | endoglin isoform 1 precursor                                                     | 1.25 | 0.65 | 0.75 | 1.07 | 6.51E-01 | 5.52E-01 | 3.65E-01 | 2.37E-01 |
| XP_005255239.1 | SMG1        | serine/threonine-protein kinase SMG1 isoform X1                                  | 1.15 | 1.07 | 1.23 | 1.11 | 6.87E-02 | 2.22E-02 | 6.40E-01 | 5.29E-01 |
| NP_001127867.1 | C7orf50     | uncharacterized protein C7orf50 isoform a                                        | 0.90 | 0.98 | 0.88 | 1.03 | 1.23E-02 | 8.63E-04 | 5.60E-01 | 4.39E-01 |
| NP_001837.2    | COL4A2      | collagen alpha-2(IV) chain                                                       | 0.87 | 0.96 | 0.83 | 0.93 | 2.87E-02 | 4.58E-03 | 1.59E-01 | 6.67E-02 |
| NP_005006.4    | OXA1L       | mitochondrial inner membrane protein OXA1L                                       | 1.25 | 0.94 | 1.16 | 1.18 | 2.04E-01 | 1.13E-01 | 1.92E-01 | 9.12E-02 |
| NP_003322.3    | TYK2        | non-receptor tyrosine-protein kinase TYK2                                        | 0.99 | 1.05 | 1.04 | 1.11 | 8.73E-01 | 8.22E-01 | 6.29E-01 | 5.18E-01 |
| NP_060418.4    | NOL8        | nucleolar protein 8 isoform a                                                    | 1.07 | 1.04 | 1.08 | 1.19 | 9.01E-01 | 8.60E-01 | 9.67E-01 | 9.53E-01 |
| XP_016878950.1 | CMC2        | COX assembly mitochondrial protein 2 homolog isoform X1                          | 1.03 | 0.94 | 0.97 | 1.00 | 6.55E-01 | 5.56E-01 | 3.85E-01 | 2.56E-01 |
| XP_024306633.1 | UBE2O       | (E3-independent) E2 ubiquitin-conjugating enzyme isoform X1                      | 1.14 | 0.88 | 1.00 | 1.04 | 3.66E-01 | 2.48E-01 | 3.01E-01 | 1.79E-01 |
| NP_006043.1    | VPS26C      | vacuolar protein sorting-associated protein 26C isoform 1                        | 1.07 | 0.91 | 0.97 | 1.16 | 8.39E-03 | 3.88E-04 | 1.32E-01 | 4.83E-02 |
| NP_055060.1    | RNF7        | RING-box protein 2 isoform 1                                                     | 1.00 | 0.99 | 1.02 | 0.84 | 9.45E-01 | 9.22E-01 | 9.92E-01 | 9.87E-01 |
| NP_057280.2    | RBM19       | probable RNA-binding protein 19                                                  | 0.93 | 1.07 | 1.00 | 1.02 | 4.69E-01 | 3.52E-01 | 3.10E-01 | 1.86E-01 |
| XP_011513024.1 | PPP1R10     | serine/threonine-protein phosphatase 1 regulatory subunit 10 isoform X1          | 0.80 | 0.92 | 0.74 | 0.92 | 2.38E-01 | 1.39E-01 | 4.41E-01 | 3.12E-01 |
| NP_001138904.1 | SMIM20      | small integral membrane protein 20                                               | 0.91 | 1.08 | 0.99 | 0.96 | 4.64E-01 | 3.46E-01 | 3.21E-01 | 1.96E-01 |
| NP_001190991.1 | COMMD3-BMI1 | COMMD3-BMI1 read-through protein                                                 | 1.07 | 0.81 | 0.87 | 1.07 | 3.98E-01 | 2.78E-01 | 1.48E-01 | 5.94E-02 |
| XP_005257220.1 | CASC3       | protein CASC3 isoform X1                                                         | 0.86 | 1.05 | 0.90 | 0.98 | 7.52E-02 | 2.56E-02 | 1.38E-01 | 5.21E-02 |
| NP_001305844.1 | LSAMP       | limbic system-associated membrane protein isoform 2 precursor                    | 1.18 | 0.98 | 1.15 | 1.17 | 9.78E-02 | 3.81E-02 | 1.14E-01 | 3.65E-02 |
| NP_001138505.1 | C11orf96    | uncharacterized protein C11orf96                                                 | 1.06 | 1.23 | 1.31 | 1.33 | 1.63E-01 | 8.23E-02 | 1.32E-01 | 4.82E-02 |
| NP_112487.1    | SLIRP       | SRA stem-loop-interacting RNA-binding protein, mitochondrial isoform 1 precursor | 0.86 | 1.06 | 0.91 | 0.94 | 5.04E-02 | 1.32E-02 | 1.15E-01 | 3.81E-02 |
| NP_001354670.1 | RABGEF1     | rab5 GDP/GTP exchange factor isoform e                                           | 1.02 | 1.09 | 1.10 | 1.45 | 9.04E-01 | 8.62E-01 | 8.28E-01 | 7.59E-01 |
| NP_005220.2    | ELK1        | ETS domain-containing protein Elk-1 isoform a                                    | 1.40 | 0.84 | 1.14 | 1.24 | 6.69E-01 | 5.72E-01 | 5.12E-01 | 3.88E-01 |
| NP_775889.1    | INO80E      | INO80 complex subunit E isoform 1                                                | 1.22 | 0.77 | 0.94 | 1.17 | 1.97E-01 | 1.08E-01 | 9.04E-02 | 2.42E-02 |



|                |          |                                                                                     |      |      |      |      |          |          |          |          |
|----------------|----------|-------------------------------------------------------------------------------------|------|------|------|------|----------|----------|----------|----------|
| NP_001306587.1 | DUSP23   | dual specificity protein phosphatase 23                                             | 0.95 | 0.97 | 0.92 | 1.03 | 4.49E-01 | 3.29E-01 | 7.23E-01 | 6.26E-01 |
| NP_001258965.1 | LRRC14   | leucine-rich repeat-containing protein 14                                           | 1.51 | 0.64 | 0.97 | 0.96 | 5.53E-02 | 1.58E-02 | 4.55E-02 | 3.74E-03 |
| XP_024307267.1 | NDUFS7   | NADH dehydrogenase [ubiquinone] iron-sulfur protein 7, mitochondrial isoform X3     | 0.98 | 1.06 | 1.04 | 1.07 | 5.00E-01 | 3.82E-01 | 1.37E-01 | 5.17E-02 |
| NP_001139256.1 | BORCS8   | BLOC-1-related complex subunit 8 isoform 1                                          | 1.26 | 0.81 | 0.99 | 1.22 | 4.76E-01 | 3.59E-01 | 3.22E-01 | 1.97E-01 |
| NP_996670.1    | MORF4L1  | mortality factor 4-like protein 1 isoform 2                                         | 0.79 | 1.01 | 0.79 | 1.05 | 9.65E-03 | 4.97E-04 | 3.53E-02 | 1.59E-03 |
| NP_060832.1    | LIN7C    | protein lin-7 homolog C                                                             | 0.93 | 1.02 | 0.94 | 1.05 | 7.08E-02 | 2.33E-02 | 1.08E-01 | 3.34E-02 |
| NP_775746.1    | DCUN1D3  | DCN1-like protein 3                                                                 | 1.62 | 0.61 | 0.98 | 1.28 | 1.46E-02 | 1.29E-03 | 7.09E-02 | 1.37E-02 |
| NP_004652.2    | CDC23    | cell division cycle protein 23 homolog                                              | 0.92 | 0.98 | 0.89 | 1.05 | 1.61E-01 | 8.12E-02 | 3.82E-01 | 2.53E-01 |
| NP_115675.1    | DCUN1D5  | DCN1-like protein 5 isoform a                                                       | 1.25 | 0.87 | 1.08 | 1.14 | 1.82E-01 | 9.57E-02 | 2.52E-01 | 1.36E-01 |
| NP_001307707.1 | SCAMP2   | secretory carrier-associated membrane protein 2 isoform 1                           | 1.14 | 0.93 | 1.06 | 1.17 | 6.25E-02 | 1.92E-02 | 5.88E-02 | 8.54E-03 |
| NP_573571.1    | WIPF2    | WAS/WASL-interacting protein family member 2                                        | 1.05 | 1.03 | 1.07 | 1.04 | 4.23E-01 | 3.04E-01 | 8.93E-01 | 8.45E-01 |
| NP_702907.1    | CPNE4    | copine-4 isoform 1                                                                  | 0.91 | 0.78 | 0.71 | 1.09 | 7.01E-01 | 6.11E-01 | 6.92E-01 | 5.91E-01 |
| NP_112577.1    | SF3B5    | splicing factor 3B subunit 5                                                        | 0.88 | 0.96 | 0.85 | 0.97 | 5.53E-01 | 4.40E-01 | 7.09E-01 | 6.09E-01 |
| XP_005264105.1 | MAP4K4   | mitogen-activated protein kinase kinase kinase 4 isoform X1                         | 1.02 | 0.97 | 0.99 | 1.03 | 5.80E-01 | 4.70E-01 | 5.41E-01 | 4.20E-01 |
| XP_011514891.1 | TRIM56   | E3 ubiquitin-protein ligase TRIM56 isoform X1                                       | 1.00 | 0.89 | 0.90 | 1.01 | 9.68E-01 | 9.53E-01 | 4.66E-01 | 3.39E-01 |
| NP_001128647.1 | NEDD1    | protein NEDD1 isoform a                                                             | 1.07 | 0.92 | 0.98 | 1.18 | 9.47E-01 | 9.25E-01 | 7.99E-01 | 7.24E-01 |
| XP_016877188.1 | SETD3    | actin-histidine N-methyltransferase isoform X1                                      | 0.77 | 0.95 | 0.74 | 1.10 | 4.78E-02 | 1.18E-02 | 1.32E-01 | 4.88E-02 |
| NP_004796.1    | POLR2D   | DNA-directed RNA polymerase II subunit RPB4                                         | 0.82 | 1.15 | 0.94 | 0.96 | 4.22E-01 | 3.02E-01 | 2.69E-01 | 1.50E-01 |
| NP_001183955.1 | PLEKHA8  | pleckstrin homology domain-containing family A member 8 isoform 1                   | 1.11 | 0.89 | 0.98 | 1.24 | 4.92E-01 | 3.74E-01 | 2.85E-01 | 1.64E-01 |
| NP_057333.1    | MAGEC2   | melanoma-associated antigen C2                                                      | 0.84 | 0.94 | 0.79 | 1.12 | 2.48E-01 | 1.47E-01 | 4.16E-01 | 2.88E-01 |
| XP_006711722.1 | ARHGEF11 | rho guanine nucleotide exchange factor 11 isoform X1                                | 0.88 | 1.10 | 0.97 | 1.20 | 2.17E-01 | 1.22E-01 | 1.51E-01 | 6.10E-02 |
| XP_016863143.1 | SLC30A9  | zinc transporter 9 isoform X1                                                       | 1.18 | 0.96 | 1.13 | 1.10 | 4.23E-02 | 9.50E-03 | 1.09E-01 | 3.41E-02 |
| NP_057121.2    | UTP11    | probable U3 small nucleolar RNA-associated protein 11                               | 1.08 | 0.95 | 1.03 | 1.14 | 1.62E-01 | 8.19E-02 | 1.20E-01 | 4.10E-02 |
| XP_011526491.1 | MRPL34   | 39S ribosomal protein L34, mitochondrial isoform X1                                 | 0.88 | 1.01 | 0.89 | 1.10 | 3.68E-01 | 2.50E-01 | 3.69E-01 | 2.41E-01 |
| NP_001007560.1 | SS18     | protein SSXT isoform 1                                                              | 0.99 | 0.98 | 0.97 | 1.10 | 9.26E-01 | 8.91E-01 | 9.92E-01 | 9.87E-01 |
| NP_005019.2    | PIP4K2A  | phosphatidylinositol 5-phosphate 4-kinase type-2 alpha isoform 1                    | 1.27 | 0.86 | 1.08 | 1.20 | 4.78E-02 | 1.19E-02 | 1.27E-01 | 4.49E-02 |
| NP_036528.1    | PHLDA3   | pleckstrin homology-like domain family A member 3                                   | 1.02 | 0.71 | 0.72 | 0.90 | 3.66E-01 | 2.48E-01 | 4.32E-02 | 2.77E-03 |
| NP_001358254.1 | PTGR2    | prostaglandin reductase 2 isoform 1                                                 | 1.44 | 0.96 | 1.39 | 1.76 | 7.24E-02 | 2.40E-02 | 1.94E-01 | 9.23E-02 |
| NP_060937.2    | USE1     | vesicle transport protein USE1                                                      | 0.93 | 0.92 | 0.85 | 1.08 | 2.80E-01 | 1.74E-01 | 9.35E-01 | 9.06E-01 |
| NP_001310253.1 | MAPK8    | mitogen-activated protein kinase 8 isoform alpha 1                                  | 1.04 | 0.89 | 0.93 | 1.09 | 4.63E-01 | 3.45E-01 | 1.38E-01 | 5.28E-02 |
| NP_003354.2    | USP4     | ubiquitin carboxyl-terminal hydrolase 4 isoform a                                   | 1.26 | 1.02 | 1.30 | 1.11 | 3.67E-01 | 2.49E-01 | 4.41E-01 | 3.12E-01 |
| NP_002480.1    | NDUFA4   | cytochrome c oxidase subunit NDUFA4                                                 | 0.75 | 1.16 | 0.87 | 0.91 | 1.64E-02 | 1.61E-03 | 5.34E-02 | 6.26E-03 |
| NP_789788.1    | GATC     | glutamyl-tRNA(Gln) amidotransferase subunit C, mitochondrial                        | 1.24 | 0.80 | 0.97 | 1.20 | 5.25E-01 | 4.11E-01 | 3.54E-01 | 2.26E-01 |
| XP_011522151.1 | LLGL1    | lethal(2) giant larvae protein homolog 1 isoform X1                                 | 1.08 | 0.93 | 1.00 | 1.15 | 6.31E-01 | 5.27E-01 | 4.11E-01 | 2.81E-01 |
| NP_001180289.1 | EXD2     | exonuclease 3'-5' domain-containing protein 2 isoform 1                             | 1.05 | 1.14 | 1.19 | 1.50 | 1.68E-01 | 8.55E-02 | 7.69E-01 | 6.85E-01 |
| NP_001839.2    | COL6A1   | collagen alpha-1(VI) chain precursor                                                | 1.01 | 1.06 | 1.07 | 0.99 | 8.81E-01 | 8.33E-01 | 6.41E-01 | 5.30E-01 |
| XP_006715809.1 | ANLN     | anillin isoform X1                                                                  | 1.41 | 0.81 | 1.13 | 1.02 | 2.12E-02 | 2.65E-03 | 3.53E-02 | 1.32E-03 |
| NP_078873.2    | MAP7D3   | MAP7 domain-containing protein 3 isoform 1                                          | 0.95 | 0.97 | 0.89 | 1.12 | 7.89E-01 | 7.14E-01 | 9.58E-01 | 9.39E-01 |
| NP_004371.2    | CREBBP   | CREB-binding protein isoform a                                                      | 0.63 | 0.77 | 0.47 | 0.70 | 3.13E-01 | 2.02E-01 | 6.35E-01 | 5.23E-01 |
| NP_776195.2    | YIPF6    | protein YIPF6 isoform A                                                             | 1.09 | 1.00 | 1.09 | 1.08 | 4.78E-02 | 1.18E-02 | 2.96E-01 | 1.74E-01 |
| NP_057205.2    | KCTD3    | BTB/POZ domain-containing protein KCTD3 isoform 1                                   | 1.08 | 0.87 | 0.93 | 1.46 | 8.28E-01 | 7.61E-01 | 5.16E-01 | 3.92E-01 |
| NP_004696.2    | THAP12   | 52 kDa repressor of the inhibitor of the protein kinase                             | 0.92 | 1.06 | 0.97 | 1.06 | 5.92E-01 | 4.83E-01 | 4.43E-01 | 3.14E-01 |
| NP_064520.2    | WRNIP1   | ATPase WRNIP1 isoform 1                                                             | 0.97 | 1.12 | 1.09 | 1.04 | 5.61E-01 | 4.50E-01 | 2.02E-01 | 9.78E-02 |
| XP_006717116.1 | OSTF1    | osteoclast-stimulating factor 1 isoform X1                                          | 1.00 | 0.94 | 0.94 | 1.17 | 9.66E-01 | 9.50E-01 | 4.33E-01 | 3.04E-01 |
| NP_037453.1    | SNX8     | sorting nexin-8                                                                     | 1.14 | 0.92 | 1.04 | 1.47 | 1.85E-01 | 9.83E-02 | 1.50E-01 | 6.05E-02 |
| NP_068598.1    | FASTKD5  | FAST kinase domain-containing protein 5, mitochondrial                              | 1.12 | 0.98 | 1.09 | 1.06 | 2.89E-01 | 1.82E-01 | 2.74E-01 | 1.55E-01 |
| NP_004330.1    | PTTG1IP  | pituitary tumor-transforming gene 1 protein-interacting protein isoform 1 precursor | 1.09 | 1.04 | 1.13 | 1.11 | 2.21E-01 | 1.26E-01 | 8.24E-01 | 7.53E-01 |

|                |          |                                                                                         |      |      |      |      |          |          |          |          |
|----------------|----------|-----------------------------------------------------------------------------------------|------|------|------|------|----------|----------|----------|----------|
| NP_006417.2    | DPYSL4   | dihydropyrimidinase-related protein 4                                                   | 1.03 | 0.85 | 0.87 | 0.90 | 4.45E-01 | 3.25E-01 | 7.29E-02 | 1.50E-02 |
| NP_060176.2    | WDR55    | WD repeat-containing protein 55                                                         | 0.97 | 0.96 | 0.93 | 1.18 | 4.37E-01 | 3.18E-01 | 8.27E-01 | 7.56E-01 |
| NP_001268364.1 | MAP2K4   | dual specificity mitogen-activated protein kinase kinase 4 isoform 2                    | 0.89 | 0.97 | 0.87 | 0.78 | 4.00E-01 | 2.80E-01 | 6.47E-01 | 5.37E-01 |
| XP_011520156.1 | RAB27A   | ras-related protein Rab-27A isoform X1                                                  | 1.03 | 0.89 | 0.92 | 1.05 | 6.26E-02 | 1.93E-02 | 3.71E-02 | 2.03E-03 |
| XP_011537005.1 | STAT6    | signal transducer and activator of transcription 6 isoform X1                           | 1.01 | 1.17 | 1.19 | 1.01 | 9.43E-01 | 9.19E-01 | 6.65E-01 | 5.59E-01 |
| NP_006433.2    | DRAP1    | dr1-associated corepressor                                                              | 0.96 | 0.95 | 0.92 | 0.98 | 1.95E-02 | 2.26E-03 | 7.53E-01 | 6.65E-01 |
| XP_011538066.1 | FAS      | tumor necrosis factor receptor superfamily member 6 isoform X1                          | 1.24 | 0.80 | 1.00 | 1.16 | 4.34E-01 | 3.13E-01 | 2.22E-01 | 1.12E-01 |
| NP_061746.1    | PCDHGB2  | protocadherin gamma-B2 isoform 1 precursor                                              | 0.77 | 1.02 | 0.78 | 1.09 | 2.45E-01 | 1.44E-01 | 2.48E-01 | 1.32E-01 |
| NP_001273399.1 | DGLUCY   | D-glutamate cyclase, mitochondrial isoform b precursor                                  | 1.05 | 0.82 | 0.86 | 1.03 | 3.58E-01 | 2.41E-01 | 1.99E-01 | 9.55E-02 |
| NP_001164189.1 | BCAR1    | breast cancer anti-estrogen resistance protein 1 isoform 5                              | 0.92 | 0.97 | 0.89 | 1.16 | 3.68E-01 | 2.51E-01 | 6.48E-01 | 5.42E-01 |
| NP_006582.1    | POLD3    | DNA polymerase delta subunit 3 isoform 1                                                | 0.87 | 0.94 | 0.81 | 0.97 | 5.14E-02 | 1.39E-02 | 1.45E-01 | 5.73E-02 |
| NP_078976.2    | SNIP1    | smad nuclear-interacting protein 1                                                      | 0.90 | 0.85 | 0.77 | 0.73 | 4.12E-01 | 2.91E-01 | 7.46E-01 | 6.58E-01 |
| NP_076423.2    | FUNDC2   | FUN14 domain-containing protein 2                                                       | 0.85 | 1.02 | 0.86 | 0.94 | 4.17E-01 | 2.97E-01 | 4.55E-01 | 3.27E-01 |
| NP_006708.2    | SPIN1    | spindlin-1                                                                              | 0.98 | 0.95 | 0.92 | 1.25 | 7.01E-01 | 6.11E-01 | 7.96E-01 | 7.21E-01 |
| NP_284941.2    | MFN1     | mitofusin-1                                                                             | 0.97 | 0.95 | 0.92 | 1.10 | 7.45E-01 | 6.63E-01 | 9.17E-01 | 8.79E-01 |
| NP_037418.3    | RBM15B   | putative RNA-binding protein 15B                                                        | 0.95 | 1.05 | 1.00 | 1.12 | 5.09E-01 | 3.92E-01 | 3.42E-01 | 2.14E-01 |
| NP_001273035.1 | ATG5     | autophagy protein 5 isoform a                                                           | 1.21 | 1.09 | 1.28 | 1.27 | 3.22E-01 | 2.10E-01 | 7.53E-01 | 6.67E-01 |
| XP_005248599.1 | PIK3R1   | phosphatidylinositol 3-kinase regulatory subunit alpha isoform X1                       | 1.07 | 0.95 | 1.01 | 1.17 | 4.69E-01 | 3.51E-01 | 4.58E-01 | 3.29E-01 |
| NP_004522.1    | MOC52    | molybdopterin synthase catalytic subunit large subunit MOC52B                           | 1.09 | 0.86 | 0.94 | 0.94 | 2.99E-01 | 1.89E-01 | 1.16E-01 | 3.85E-02 |
| NP_057724.2    | MRPS30   | 39S ribosomal protein S30, mitochondrial                                                | 1.15 | 0.91 | 1.01 | 1.60 | 7.67E-01 | 6.87E-01 | 6.30E-01 | 5.18E-01 |
| NP_001034229.1 | C20orf27 | UPF0687 protein C20orf27 isoform 1                                                      | 1.15 | 0.92 | 1.06 | 1.07 | 3.82E-02 | 7.82E-03 | 1.08E-01 | 3.36E-02 |
| NP_036524.1    | PEF1     | peflin isoform 1                                                                        | 1.06 | 0.91 | 0.96 | 0.99 | 9.14E-02 | 3.46E-02 | 1.48E-01 | 5.89E-02 |
| NP_064584.1    | C5orf15  | keratinocyte-associated transmembrane protein 2 precursor                               | 1.04 | 0.99 | 1.03 | 1.15 | 3.84E-01 | 2.66E-01 | 5.44E-01 | 4.22E-01 |
| XP_016873413.1 | PIK3C2A  | phosphatidylinositol 4-phosphate 3-kinase C2 domain-containing subunit alpha isoform X1 | 0.76 | 1.13 | 0.87 | 1.06 | 2.99E-01 | 1.89E-01 | 2.91E-01 | 1.70E-01 |
| XP_005255095.1 | CDIPT    | CDP-diacylglycerol--inositol 3-phosphatidyltransferase isoform X1                       | 1.13 | 0.88 | 1.00 | 0.99 | 1.92E-02 | 2.21E-03 | 4.39E-02 | 3.02E-03 |
| NP_001157289.1 | DHCR7    | 7-dehydrocholesterol reductase                                                          | 0.95 | 1.12 | 1.06 | 1.21 | 6.31E-01 | 5.27E-01 | 4.11E-01 | 2.82E-01 |
| NP_004821.2    | MED23    | mediator of RNA polymerase II transcription subunit 23 isoform a                        | 0.81 | 1.18 | 0.94 | 0.99 | 3.40E-01 | 2.25E-01 | 2.65E-01 | 1.47E-01 |
| NP_001005743.1 | NUMB     | protein numb homolog isoform 1                                                          | 1.10 | 0.97 | 1.07 | 1.11 | 5.39E-01 | 4.25E-01 | 4.49E-01 | 3.20E-01 |
| NP_060017.1    | FOXRED1  | FAD-dependent oxidoreductase domain-containing protein 1                                | 1.15 | 0.86 | 0.99 | 1.23 | 8.67E-02 | 3.21E-02 | 9.42E-02 | 2.65E-02 |
| NP_079436.4    | WDR26    | WD repeat-containing protein 26 isoform a                                               | 1.28 | 0.88 | 1.12 | 1.15 | 4.60E-02 | 1.12E-02 | 5.40E-02 | 6.77E-03 |
| XP_011527964.1 | AGPAT3   | 1-acyl-sn-glycerol-3-phosphate acyltransferase gamma isoform X4                         | 1.18 | 0.92 | 1.09 | 1.36 | 5.33E-02 | 1.48E-02 | 2.99E-01 | 1.77E-01 |
| NP_001337865.1 | ZCCHC8   | zinc finger CCHC domain-containing protein 8 isoform 3                                  | 1.09 | 0.95 | 1.02 | 1.20 | 7.70E-01 | 6.92E-01 | 6.90E-01 | 5.88E-01 |
| XP_005270314.1 | ITPRIP   | inositol 1,4,5-trisphosphate receptor-interacting protein isoform X1                    | 1.05 | 0.98 | 1.04 | 1.07 | 5.64E-01 | 4.53E-01 | 5.08E-01 | 3.83E-01 |
| XP_011522496.1 | BAIAP2   | brain-specific angiogenesis inhibitor 1-associated protein 2 isoform X1                 | 0.82 | 1.37 | 1.15 | 1.03 | 2.18E-01 | 1.23E-01 | 2.71E-01 | 1.52E-01 |
| XP_016865012.1 | PAIP2    | polyadenylate-binding protein-interacting protein 2 isoform X1                          | 0.64 | 1.06 | 0.68 | 0.86 | 1.55E-01 | 7.61E-02 | 1.76E-01 | 8.00E-02 |
| NP_001350700.1 | GGA1     | ADP-ribosylation factor-binding protein GGA1 isoform 6                                  | 0.98 | 1.15 | 1.13 | 0.98 | 8.81E-01 | 8.34E-01 | 3.42E-01 | 2.15E-01 |
| NP_056046.1    | NUP160   | nuclear pore complex protein Nup160 isoform 1                                           | 1.09 | 0.97 | 1.06 | 1.08 | 5.02E-01 | 3.84E-01 | 4.17E-01 | 2.89E-01 |
| NP_001035830.1 | PGP      | glycerol-3-phosphate phosphatase                                                        | 1.07 | 0.93 | 0.99 | 1.12 | 3.83E-01 | 2.64E-01 | 2.97E-01 | 1.75E-01 |
| NP_006611.1    | HBS1L    | HBS1-like protein isoform 1                                                             | 0.97 | 1.05 | 1.02 | 1.17 | 7.59E-01 | 6.79E-01 | 5.19E-01 | 3.95E-01 |
| NP_057297.2    | TRIP4    | activating signal cointegrator 1 isoform 1                                              | 1.27 | 0.91 | 1.13 | 1.53 | 4.51E-01 | 3.32E-01 | 3.55E-01 | 2.27E-01 |
| NP_055134.2    | LEMD3    | inner nuclear membrane protein Man1 isoform 1                                           | 0.86 | 1.01 | 0.86 | 0.99 | 1.09E-01 | 4.53E-02 | 3.65E-01 | 2.36E-01 |
| NP_066961.2    | TRAF2    | TNF receptor-associated factor 2                                                        | 0.90 | 1.21 | 1.08 | 1.19 | 3.63E-01 | 2.45E-01 | 3.51E-01 | 2.24E-01 |
| NP_057146.1    | CIAO2B   | cytosolic iron-sulfur assembly component 2B                                             | 0.93 | 1.01 | 0.94 | 1.14 | 2.29E-01 | 1.32E-01 | 4.00E-01 | 2.70E-01 |
| NP_060379.2    | RMND1    | required for meiotic nuclear division protein 1 homolog isoform 1                       | 1.03 | 1.02 | 1.05 | 1.15 | 5.93E-01 | 4.85E-01 | 9.64E-01 | 9.48E-01 |
| NP_757386.2    | SUGP1    | SURP and G-patch domain-containing protein 1                                            | 1.26 | 1.13 | 1.43 | 1.41 | 3.68E-01 | 2.50E-01 | 6.65E-01 | 5.60E-01 |
| XP_011524916.1 | AKT2     | RAC-beta serine/threonine-protein kinase isoform X1                                     | 1.20 | 0.89 | 1.06 | 1.24 | 1.08E-01 | 4.50E-02 | 8.38E-02 | 2.01E-02 |
| NP_002659.1    | PLP2     | proteolipid protein 2                                                                   | 1.01 | 0.93 | 0.94 | 1.07 | 8.33E-01 | 7.69E-01 | 2.62E-01 | 1.44E-01 |

|                |          |                                                                             |      |      |      |      |          |          |          |          |
|----------------|----------|-----------------------------------------------------------------------------|------|------|------|------|----------|----------|----------|----------|
| NP_061330.2    | BAIAP2L1 | brain-specific angiogenesis inhibitor 1-associated protein 2-like protein 1 | 1.02 | 1.00 | 1.02 | 0.99 | 7.87E-01 | 7.12E-01 | 8.15E-01 | 7.43E-01 |
| NP_001139574.1 | PARP9    | protein mono-ADP-ribosyltransferase PARP9 isoform a                         | 0.77 | 1.13 | 0.87 | 0.97 | 3.93E-01 | 2.73E-01 | 2.85E-01 | 1.64E-01 |
| NP_699198.2    | ZCCHC24  | zinc finger CCHC domain-containing protein 24                               | 0.95 | 0.99 | 0.95 | 1.09 | 6.35E-01 | 5.32E-01 | 8.03E-01 | 7.30E-01 |
| NP_473368.1    | ANKH     | progressive ankylosis protein homolog                                       | 0.82 | 0.78 | 0.64 | 0.79 | 1.86E-01 | 9.92E-02 | 7.66E-01 | 6.82E-01 |
| NP_055580.1    | TOMM20   | mitochondrial import receptor subunit TOM20 homolog                         | 1.19 | 0.82 | 0.97 | 1.18 | 3.60E-01 | 2.43E-01 | 2.15E-01 | 1.06E-01 |
| XP_024309639.1 | MFSM10   | major facilitator superfamily domain-containing protein 10 isoform X1       | 1.14 | 1.08 | 1.23 | 1.08 | 1.85E-01 | 9.79E-02 | 5.76E-01 | 4.60E-01 |
| XP_005250783.1 | POM121   | nuclear envelope pore membrane protein POM 121 isoform X1                   | 1.02 | 1.02 | 1.05 | 1.06 | 1.40E-02 | 1.13E-03 | 9.19E-01 | 8.84E-01 |
| NP_006690.1    | MAN1A2   | mannosyl-oligosaccharide 1,2-alpha-mannosidase IB                           | 1.16 | 0.78 | 0.91 | 1.13 | 1.83E-02 | 1.99E-03 | 2.47E-01 | 1.31E-01 |
| XP_006714224.1 | TRIM2    | tripartite motif-containing protein 2 isoform X4                            | 1.27 | 0.84 | 0.99 | 1.30 | 7.36E-01 | 6.51E-01 | 5.76E-01 | 4.59E-01 |
| XP_011521388.1 | MVD      | diphosphomevalonate decarboxylase isoform X1                                | 1.53 | 0.75 | 1.08 | 1.31 | 4.61E-01 | 3.42E-01 | 3.24E-01 | 1.99E-01 |
| NP_078820.2    | MUL1     | mitochondrial ubiquitin ligase activator of NFKB 1                          | 1.14 | 0.91 | 1.03 | 1.23 | 1.07E-01 | 4.41E-02 | 4.65E-01 | 3.36E-01 |
| NP_001186384.1 | BRD2     | bromodomain-containing protein 2 isoform 2                                  | 0.92 | 0.99 | 0.91 | 1.05 | 2.54E-01 | 1.52E-01 | 6.60E-01 | 5.54E-01 |
| NP_057256.2    | UBAC1    | ubiquitin-associated domain-containing protein 1                            | 1.02 | 0.90 | 0.92 | 1.14 | 7.85E-01 | 7.10E-01 | 3.21E-01 | 1.96E-01 |
| NP_060294.1    | MARCHF5  | E3 ubiquitin-protein ligase MARCH5                                          | 0.96 | 0.88 | 0.83 | 1.37 | 8.39E-01 | 7.76E-01 | 8.58E-01 | 8.01E-01 |
| NP_004882.1    | MRPL33   | 39S ribosomal protein L33, mitochondrial isoform a                          | 1.06 | 1.01 | 1.07 | 1.07 | 6.69E-01 | 5.72E-01 | 7.87E-01 | 7.08E-01 |
| NP_954981.1    | CCDC137  | coiled-coil domain-containing protein 137                                   | 0.82 | 1.10 | 0.86 | 0.88 | 5.82E-01 | 4.73E-01 | 5.35E-01 | 4.12E-01 |
| NP_777576.1    | UBR1     | E3 ubiquitin-protein ligase UBR1                                            | 1.12 | 1.09 | 1.18 | 1.10 | 7.32E-01 | 6.46E-01 | 9.43E-01 | 9.17E-01 |
| NP_005769.1    | RBM5     | RNA-binding protein 5                                                       | 0.86 | 0.97 | 0.83 | 1.10 | 1.58E-01 | 7.87E-02 | 3.15E-01 | 1.91E-01 |
| NP_005079.2    | AKAP17A  | A-kinase anchor protein 17A isoform 1                                       | 1.25 | 1.08 | 1.35 | 1.14 | 1.18E-01 | 5.10E-02 | 2.15E-01 | 1.07E-01 |
| NP_001358373.1 | BCS1L    | mitochondrial chaperone BCS1 isoform a                                      | 1.03 | 0.91 | 0.94 | 1.15 | 6.17E-01 | 5.13E-01 | 1.78E-01 | 8.08E-02 |
| NP_001020118.1 | YIPF5    | protein YIPF5 isoform a                                                     | 1.07 | 0.86 | 0.92 | 1.05 | 4.65E-01 | 3.47E-01 | 1.59E-01 | 6.67E-02 |
| NP_001353602.1 | DPY19L1  | probable C-mannosyltransferase DPY19L1 isoform 1                            | 0.91 | 1.06 | 0.98 | 0.71 | 2.73E-01 | 1.69E-01 | 6.91E-01 | 5.89E-01 |
| NP_066983.1    | ABHD16A  | phosphatidylserine lipase ABHD16A isoform a                                 | 1.08 | 0.98 | 1.06 | 1.10 | 8.53E-02 | 3.14E-02 | 1.81E-01 | 8.28E-02 |
| NP_006005.2    | LAGE3    | EKC/KEOPS complex subunit LAGE3                                             | 0.93 | 0.73 | 0.68 | 0.86 | 6.36E-01 | 5.35E-01 | 3.07E-01 | 1.83E-01 |
| XP_005254344.1 | TMEM87A  | transmembrane protein 87A isoform X1                                        | 1.01 | 1.00 | 1.01 | 1.12 | 5.55E-01 | 4.43E-01 | 4.59E-01 | 3.31E-01 |
| XP_016874213.1 | SNRNP35  | U11/U12 small nuclear ribonucleoprotein 35 kDa protein isoform X1           | 1.50 | 1.37 | 1.74 | 1.43 | 5.79E-01 | 4.69E-01 | 9.05E-01 | 8.62E-01 |
| XP_024309015.1 | CIAO1    | probable cytosolic iron-sulfur protein assembly protein CIAO1 isoform X1    | 1.05 | 0.92 | 0.96 | 1.02 | 5.14E-01 | 3.98E-01 | 3.50E-01 | 2.23E-01 |
| XP_016878982.1 | TBC1D24  | TBC1 domain family member 24 isoform X1                                     | 0.99 | 0.99 | 0.98 | 0.93 | 9.19E-01 | 8.82E-01 | 9.74E-01 | 9.60E-01 |
| NP_001172112.1 | VAMP7    | vesicle-associated membrane protein 7 isoform 3                             | 1.39 | 0.91 | 1.15 | 0.93 | 6.03E-01 | 4.97E-01 | 5.64E-01 | 4.44E-01 |
| XP_011541872.1 | SIL1     | nucleotide exchange factor SIL1 isoform X1                                  | 1.15 | 1.03 | 1.18 | 1.30 | 6.61E-02 | 2.10E-02 | 6.48E-01 | 5.41E-01 |
| NP_057542.2    | HGH1     | protein HGH1 homolog                                                        | 0.90 | 1.03 | 0.92 | 1.14 | 2.70E-01 | 1.67E-01 | 2.31E-01 | 1.19E-01 |
| XP_011510676.1 | RNF13    | E3 ubiquitin-protein ligase RNF13 isoform X1                                | 0.81 | 1.13 | 0.91 | 1.09 | 1.86E-01 | 9.93E-02 | 2.19E-01 | 1.10E-01 |
| NP_005783.2    | MPHOSPH6 | M-phase phosphoprotein 6                                                    | 0.97 | 0.90 | 0.86 | 0.95 | 8.00E-01 | 7.30E-01 | 7.32E-01 | 6.40E-01 |
| XP_016877786.1 | SPG21    | maspardin isoform X1                                                        | 1.08 | 0.87 | 0.93 | 1.03 | 6.09E-01 | 5.03E-01 | 3.80E-01 | 2.51E-01 |
| NP_612452.1    | HAUS1    | HAUS augmin-like complex subunit 1                                          | 0.99 | 0.89 | 0.86 | 1.15 | 9.26E-01 | 8.92E-01 | 7.37E-01 | 6.46E-01 |
| NP_113622.1    | TMUB1    | transmembrane and ubiquitin-like domain-containing protein 1                | 0.98 | 1.04 | 1.02 | 1.02 | 4.68E-01 | 3.50E-01 | 3.71E-01 | 2.42E-01 |
| NP_001127956.1 | TOMM5    | mitochondrial import receptor subunit TOM5 homolog isoform 3                | 1.02 | 1.02 | 1.03 | 0.97 | 6.15E-01 | 5.09E-01 | 9.57E-01 | 9.38E-01 |
| NP_001311266.1 | SHOC2    | leucine-rich repeat protein SHOC-2 isoform 1                                | 1.09 | 0.84 | 0.90 | 0.75 | 6.56E-01 | 5.58E-01 | 3.89E-01 | 2.60E-01 |
| NP_001156729.1 | PLXNB3   | plexin-B3 isoform 2                                                         | 0.99 | 0.97 | 0.96 | 1.10 | 5.48E-01 | 4.34E-01 | 8.97E-01 | 8.51E-01 |
| XP_016875199.1 | DDX55    | ATP-dependent RNA helicase DDX55 isoform X1                                 | 1.05 | 0.91 | 0.96 | 1.09 | 4.60E-01 | 3.41E-01 | 2.79E-01 | 1.59E-01 |
| NP_004727.2    | XPR1     | xenotropic and polytropic retrovirus receptor 1 isoform 1                   | 1.21 | 1.30 | 1.72 | 1.17 | 9.06E-01 | 8.65E-01 | 8.60E-01 | 8.04E-01 |
| NP_05746.3     | PPP6R1   | serine/threonine-protein phosphatase 6 regulatory subunit 1                 | 1.35 | 0.84 | 1.14 | 1.15 | 1.71E-02 | 1.81E-03 | 5.79E-02 | 8.00E-03 |
| NP_001258851.1 | SEC11A   | signal peptidase complex catalytic subunit SEC11A isoform 3                 | 1.03 | 1.05 | 1.09 | 1.09 | 5.12E-01 | 3.96E-01 | 7.14E-01 | 6.16E-01 |
| NP_116189.1    | C1orf198 | uncharacterized protein C1orf198 isoform 1                                  | 1.03 | 1.00 | 1.04 | 1.00 | 8.83E-01 | 8.37E-01 | 8.78E-01 | 8.27E-01 |
| NP_060380.3    | TRMT61B  | tRNA (adenine(58)-N(1))-methyltransferase, mitochondrial precursor          | 1.01 | 1.00 | 1.01 | 0.99 | 7.36E-01 | 6.51E-01 | 8.81E-01 | 8.31E-01 |
| XP_016875816.1 | N4BP2L2  | NEDD4-binding protein 2-like 2 isoform X1                                   | 0.95 | 0.89 | 0.85 | 1.10 | 1.52E-01 | 7.43E-02 | 1.72E-01 | 7.60E-02 |
| NP_000572.2    | GPX1     | glutathione peroxidase 1 isoform 1                                          | 1.10 | 0.82 | 0.90 | 1.19 | 4.41E-02 | 1.03E-02 | 2.31E-01 | 1.18E-01 |

|                |          |                                                                                                       |      |      |      |      |          |          |          |          |
|----------------|----------|-------------------------------------------------------------------------------------------------------|------|------|------|------|----------|----------|----------|----------|
| NP_006330.2    | HMG20B   | SWI/SNF-related matrix-associated actin-dependent regulator of chromatin subfamily E member 1-related | 0.79 | 1.05 | 0.83 | 1.14 | 1.26E-01 | 5.66E-02 | 1.20E-01 | 4.07E-02 |
| NP_079140.2    | MRM1     | rRNA methyltransferase 1, mitochondrial precursor                                                     | 1.06 | 0.99 | 1.06 | 1.05 | 7.11E-01 | 6.22E-01 | 7.46E-01 | 6.57E-01 |
| NP_689565.2    | FAM210A  | protein FAM210A                                                                                       | 1.01 | 1.00 | 1.01 | 1.02 | 7.78E-01 | 7.01E-01 | 7.96E-01 | 7.21E-01 |
| NP_055578.2    | MRPL19   | 39S ribosomal protein L19, mitochondrial                                                              | 0.97 | 0.99 | 0.95 | 1.02 | 5.02E-01 | 3.84E-01 | 8.10E-01 | 7.36E-01 |
| NP_002486.1    | NDUFS4   | NADH dehydrogenase [ubiquinone] iron-sulfur protein 4, mitochondrial isoform 1 precursor              | 0.82 | 1.18 | 0.96 | 0.96 | 6.22E-02 | 1.91E-02 | 1.01E-01 | 2.96E-02 |
| NP_001164188.1 | BCAR1    | breast cancer anti-estrogen resistance protein 1 isoform 4                                            | 0.94 | 1.02 | 0.97 | 1.11 | 1.84E-01 | 9.75E-02 | 1.92E-01 | 9.09E-02 |
| NP_004901.2    | PITPNM1  | membrane-associated phosphatidylinositol transfer protein 1 isoform a                                 | 1.04 | 0.95 | 0.99 | 1.09 | 2.60E-02 | 3.78E-03 | 4.33E-02 | 2.89E-03 |
| NP_001511.2    | GTF3C1   | general transcription factor 3C polypeptide 1 isoform 1                                               | 0.96 | 1.07 | 1.02 | 1.11 | 4.69E-01 | 3.52E-01 | 6.80E-01 | 5.77E-01 |
| XP_005260446.1 | SS18L1   | calcium-responsive transactivator isoform X1                                                          | 1.18 | 0.99 | 1.15 | 1.20 | 5.54E-01 | 4.42E-01 | 5.41E-01 | 4.18E-01 |
| NP_258411.2    | TRIM47   | E3 ubiquitin-protein ligase TRIM47                                                                    | 1.21 | 0.86 | 1.04 | 1.09 | 1.12E-01 | 4.75E-02 | 1.12E-01 | 3.54E-02 |
| NP_001023.1    | RPS29    | 40S ribosomal protein S29 isoform 1                                                                   | 1.04 | 0.98 | 1.02 | 0.92 | 1.73E-01 | 8.99E-02 | 1.29E-01 | 4.65E-02 |
| NP_004313.1    | BAD      | bcl2-associated agonist of cell death                                                                 | 0.94 | 0.90 | 0.81 | 0.98 | 8.13E-01 | 7.43E-01 | 9.31E-01 | 9.03E-01 |
| XP_016873511.1 | EMSY     | BRCA2-interacting transcriptional repressor EMSY isoform X11                                          | 0.83 | 1.42 | 1.13 | 1.38 | 6.07E-01 | 5.01E-01 | 3.33E-01 | 2.07E-01 |
| XP_011507381.1 | IVNS1ABP | influenza virus NS1A-binding protein isoform X1                                                       | 0.90 | 0.99 | 0.91 | 0.95 | 5.77E-01 | 4.67E-01 | 7.76E-01 | 6.94E-01 |
| NP_001336275.1 | PLPBP    | pyridoxal phosphate homeostasis protein isoform 1                                                     | 0.96 | 1.06 | 1.02 | 1.01 | 8.00E-02 | 2.81E-02 | 1.46E-01 | 5.80E-02 |
| NP_001308427.1 | SEPTIN10 | septin-10 isoform 4                                                                                   | 1.34 | 0.93 | 1.23 | 1.19 | 2.72E-01 | 1.68E-01 | 2.73E-01 | 1.53E-01 |
| NP_071919.2    | MPP5     | MAGUK p55 subfamily member 5 isoform 1                                                                | 1.17 | 0.97 | 1.13 | 1.72 | 1.28E-01 | 5.79E-02 | 3.34E-01 | 2.08E-01 |
| XP_016881920.1 | SSBP4    | single-stranded DNA-binding protein 4 isoform X1                                                      | 0.98 | 0.93 | 0.91 | 1.00 | 4.51E-01 | 3.32E-01 | 1.62E-01 | 6.92E-02 |
| NP_005836.2    | ABCC4    | multidrug resistance-associated protein 4 isoform 1                                                   | 1.10 | 1.02 | 1.13 | 1.19 | 3.00E-01 | 1.90E-01 | 4.42E-01 | 3.13E-01 |
| NP_000535.3    | TAP2     | antigen peptide transporter 2 isoform 1                                                               | 1.09 | 1.01 | 1.10 | 1.02 | 1.62E-01 | 8.19E-02 | 2.39E-01 | 1.25E-01 |
| NP_054907.1    | SSU72    | RNA polymerase II subunit A C-terminal domain phosphatase SSU72                                       | 1.06 | 0.99 | 1.07 | 1.00 | 6.36E-01 | 5.34E-01 | 7.93E-01 | 7.16E-01 |
| NP_002482.1    | NDUFB3   | NADH dehydrogenase [ubiquinone] 1 beta subcomplex subunit 3                                           | 1.47 | 0.96 | 1.36 | 1.40 | 4.29E-01 | 3.09E-01 | 4.34E-01 | 3.05E-01 |
| NP_068747.1    | SPCS3    | signal peptidase complex subunit 3                                                                    | 1.13 | 0.91 | 1.03 | 1.06 | 2.36E-01 | 1.37E-01 | 1.40E-01 | 5.41E-02 |
| XP_005261779.1 | TCF20    | transcription factor 20 isoform X1                                                                    | 0.94 | 0.96 | 0.90 | 0.98 | 3.76E-01 | 2.58E-01 | 8.69E-01 | 8.17E-01 |
| NP_277040.1    | SELENOI  | ethanolaminephosphotransferase 1                                                                      | 1.04 | 0.97 | 1.01 | 1.07 | 7.94E-01 | 7.22E-01 | 7.61E-01 | 6.76E-01 |
| NP_001273494.1 | KIAA0513 | uncharacterized protein KIAA0513 isoform a                                                            | 0.98 | 1.04 | 1.01 | 0.89 | 7.68E-01 | 6.89E-01 | 7.10E-01 | 6.10E-01 |
| XP_005250509.1 | POLR2J   | DNA-directed RNA polymerase II subunit RPB11-a isoform X1                                             | 0.88 | 1.00 | 0.88 | 1.22 | 2.59E-01 | 1.56E-01 | 2.97E-01 | 1.75E-01 |
| NP_037408.2    | SHPK     | sedoheptulokinase                                                                                     | 0.76 | 0.93 | 0.72 | 0.89 | 1.11E-01 | 4.68E-02 | 5.23E-01 | 3.99E-01 |
| NP_612157.1    | PYGO2    | pygopus homolog 2                                                                                     | 5.09 | 0.19 | 0.96 | 1.11 | 1.46E-02 | 1.29E-03 | 3.45E-02 | 1.05E-03 |
| NP_000382.3    | TPP1     | tripeptidyl-peptidase 1                                                                               | 1.27 | 0.96 | 1.22 | 1.27 | 1.46E-01 | 6.99E-02 | 1.43E-01 | 5.57E-02 |
| NP_078929.1    | PRKRI1   | PRKR-interacting protein 1                                                                            | 1.16 | 0.89 | 1.03 | 0.83 | 7.08E-01 | 6.18E-01 | 5.02E-01 | 3.77E-01 |
| XP_011524671.1 | KLK11    | kallikrein-11 isoform X1                                                                              | 1.32 | 0.57 | 0.76 | 1.60 | 3.61E-02 | 7.01E-03 | 3.42E-02 | 8.87E-04 |
| XP_011520726.1 | ERCC4    | DNA repair endonuclease XPF isoform X1                                                                | 1.17 | 0.82 | 0.95 | 1.30 | 1.54E-01 | 7.59E-02 | 7.80E-02 | 1.67E-02 |
| NP_443087.1    | ANKRD40  | ankyrin repeat domain-containing protein 40                                                           | 1.07 | 0.81 | 0.86 | 1.16 | 8.16E-01 | 7.48E-01 | 3.64E-01 | 2.36E-01 |
| NP_055779.2    | EPN2     | epsin-2 isoform b                                                                                     | 0.95 | 1.05 | 1.00 | 0.98 | 3.54E-01 | 2.37E-01 | 2.15E-01 | 1.06E-01 |
| NP_940848.2    | C1orf122 | uncharacterized protein C1orf122 isoform 1                                                            | 1.25 | 0.90 | 1.11 | 1.13 | 4.60E-01 | 3.40E-01 | 3.46E-01 | 2.19E-01 |
| NP_001137407.1 | CROT     | peroxisomal carnitine O-octanoyltransferase isoform 1                                                 | 1.09 | 1.00 | 1.09 | 1.13 | 2.39E-01 | 1.40E-01 | 3.77E-01 | 2.49E-01 |
| NP_059118.2    | CALML5   | calmodulin-like protein 5                                                                             | 1.55 | 0.99 | 1.34 | 1.72 | 4.50E-01 | 3.31E-01 | 5.68E-01 | 4.49E-01 |
| NP_631908.1    | TRUB1    | probable tRNA pseudouridine synthase 1                                                                | 1.09 | 0.72 | 0.76 | 1.25 | 7.96E-01 | 7.25E-01 | 3.58E-01 | 2.30E-01 |
| NP_060119.3    | CNNM2    | metal transporter CNNM2 isoform 1                                                                     | 1.13 | 0.96 | 1.08 | 1.21 | 2.03E-01 | 1.13E-01 | 3.07E-01 | 1.84E-01 |
| XP_011536905.1 | CALCOCO1 | calcium-binding and coiled-coil domain-containing protein 1 isoform X1                                | 0.70 | 1.09 | 0.75 | 0.93 | 1.44E-01 | 6.84E-02 | 2.36E-01 | 1.22E-01 |
| NP_004869.1    | PTGES    | prostaglandin E synthase                                                                              | 1.21 | 1.06 | 1.29 | 1.14 | 6.13E-04 | 4.40E-06 | 7.02E-02 | 1.34E-02 |
| NP_663768.1    | SSBP3    | single-stranded DNA-binding protein 3 isoform a                                                       | 0.93 | 0.81 | 0.75 | 0.89 | 5.04E-01 | 3.88E-01 | 4.35E-01 | 3.06E-01 |
| NP_054896.2    | TIMM21   | mitochondrial import inner membrane translocase subunit Tim21 precursor                               | 0.92 | 1.06 | 0.97 | 1.04 | 5.02E-01 | 3.85E-01 | 3.77E-01 | 2.49E-01 |
| NP_001308715.1 | CBLB     | E3 ubiquitin-protein ligase CBL-B isoform a                                                           | 1.14 | 0.80 | 0.90 | 1.11 | 5.37E-01 | 4.23E-01 | 2.53E-01 | 1.36E-01 |
| NP_065747.1    | KIAA1143 | uncharacterized protein KIAA1143 isoform 1                                                            | 0.88 | 0.89 | 0.79 | 1.14 | 9.56E-02 | 3.70E-02 | 9.19E-01 | 8.82E-01 |
| NP_075067.2    | VPS33A   | vacuolar protein sorting-associated protein 33A isoform 1                                             | 1.06 | 1.30 | 1.39 | 1.23 | 7.08E-01 | 6.19E-01 | 5.22E-01 | 3.98E-01 |

|                |            |                                                                                |      |      |      |      |          |          |          |          |
|----------------|------------|--------------------------------------------------------------------------------|------|------|------|------|----------|----------|----------|----------|
| NP_115685.1    | CHCHD5     | coiled-coil-helix-coiled-coil-helix domain-containing protein 5 isoform a      | 1.41 | 0.62 | 0.87 | 1.72 | 5.95E-03 | 2.03E-04 | 1.11E-01 | 3.49E-02 |
| NP_004873.3    | CIR1       | corepressor interacting with RBPJ 1                                            | 1.25 | 0.97 | 1.18 | 1.14 | 5.46E-01 | 4.32E-01 | 5.59E-01 | 4.37E-01 |
| NP_006361.1    | VTI1B      | vesicle transport through interaction with t-SNAREs homolog 1B                 | 0.90 | 1.03 | 0.92 | 1.05 | 6.42E-02 | 2.01E-02 | 7.69E-02 | 1.64E-02 |
| XP_005273258.1 | COQ8A      | atypical kinase COQ8A, mitochondrial isoform X1                                | 1.03 | 0.72 | 0.74 | 1.14 | 7.45E-01 | 6.63E-01 | 1.15E-01 | 3.82E-02 |
| NP_060795.1    | C9orf72    | guanine nucleotide exchange C9orf72 isoform a                                  | 1.13 | 0.54 | 0.60 | 1.05 | 7.32E-01 | 6.46E-01 | 1.83E-01 | 8.43E-02 |
| NP_004137.2    | NDUFB7     | NADH dehydrogenase [ubiquinone] 1 beta subcomplex subunit 7                    | 1.05 | 1.03 | 1.08 | 1.10 | 3.84E-01 | 2.65E-01 | 8.39E-01 | 7.75E-01 |
| XP_005253178.1 | ZNF143     | zinc finger protein 143 isoform X1                                             | 1.17 | 1.21 | 1.41 | 1.49 | 1.95E-01 | 1.05E-01 | 9.29E-01 | 8.99E-01 |
| NP_001350515.1 | MIGA1      | mitoguardin 1 isoform 3                                                        | 0.81 | 0.90 | 0.76 | 1.26 | 6.39E-01 | 5.39E-01 | 7.83E-01 | 7.03E-01 |
| NP_775933.2    | RNF175     | RING finger protein 175                                                        | 1.00 | 0.87 | 0.87 | 1.00 | 6.36E-01 | 5.35E-01 | 4.77E-01 | 3.51E-01 |
| NP_060585.2    | SDAD1      | protein SDA1 homolog isoform 1                                                 | 1.11 | 0.71 | 0.79 | 1.14 | 2.66E-01 | 1.62E-01 | 6.80E-02 | 1.23E-02 |
| NP_689853.3    | DCP1B      | mRNA-decapping enzyme 1B isoform 1                                             | 0.96 | 0.98 | 0.94 | 1.16 | 2.62E-01 | 1.59E-01 | 9.13E-01 | 8.73E-01 |
| XP_006724163.1 | HMGXB4     | HMG domain-containing protein 4 isoform X1                                     | 1.14 | 0.93 | 1.04 | 1.29 | 4.17E-01 | 2.97E-01 | 5.22E-01 | 3.98E-01 |
| NP_001007539.1 | SHISA2     | protein shisa-2 homolog precursor                                              | 1.29 | 0.99 | 1.23 | 1.08 | 4.36E-01 | 3.16E-01 | 5.62E-01 | 4.41E-01 |
| XP_011524962.1 | CIC        | protein capicua homolog isoform X1                                             | 0.99 | 1.18 | 1.16 | 1.11 | 8.77E-01 | 8.27E-01 | 5.97E-01 | 4.82E-01 |
| XP_016868829.1 | MICU3      | calcium uptake protein 3, mitochondrial isoform X9                             | 1.00 | 1.02 | 1.02 | 1.17 | 9.57E-01 | 9.38E-01 | 7.69E-01 | 6.85E-01 |
| NP_001307834.1 | DTYMK      | thymidylate kinase isoform 6                                                   | 1.01 | 1.03 | 1.04 | 1.07 | 7.64E-01 | 6.84E-01 | 7.82E-01 | 7.01E-01 |
| XP_016870159.1 | APBA1      | amyloid-beta A4 precursor protein-binding family A member 1 isoform X1         | 1.05 | 1.06 | 1.11 | 1.11 | 3.34E-01 | 2.19E-01 | 8.38E-01 | 7.72E-01 |
| NP_006512.2    | TFE3       | transcription factor E3 isoform 1                                              | 1.28 | 0.91 | 1.15 | 1.15 | 6.03E-01 | 4.97E-01 | 4.90E-01 | 3.64E-01 |
| NP_001171846.1 | PCYT2      | ethanolamine-phosphate cytidyltransferase isoform 1                            | 0.99 | 1.29 | 1.26 | 1.01 | 8.79E-01 | 8.30E-01 | 4.50E-01 | 3.22E-01 |
| NP_775813.2    | PLBD2      | putative phospholipase B-like 2 isoform 1 precursor                            | 0.76 | 1.35 | 1.02 | 1.18 | 5.99E-02 | 1.81E-02 | 1.90E-01 | 8.92E-02 |
| NP_002507.1    | NOVA2      | RNA-binding protein Nova-2                                                     | 1.03 | 1.04 | 1.07 | 0.94 | 3.13E-01 | 2.02E-01 | 9.22E-01 | 8.88E-01 |
| XP_005246697.1 | MAP3K20    | mitogen-activated protein kinase kinase 20 isoform X1                          | 1.51 | 0.67 | 0.99 | 1.47 | 2.25E-01 | 1.28E-01 | 1.43E-01 | 5.55E-02 |
| NP_775489.2    | TPH2       | tryptophan 5-hydroxylase 2                                                     | 1.36 | 0.59 | 0.79 | 1.32 | 8.82E-02 | 3.29E-02 | 5.31E-02 | 6.09E-03 |
| NP_060271.1    | CMTM6      | CKLF-like MARVEL transmembrane domain-containing protein 6                     | 1.20 | 1.14 | 1.36 | 1.17 | 1.58E-01 | 7.86E-02 | 6.48E-01 | 5.41E-01 |
| NP_001243671.1 | CNOT10     | CCR4-NOT transcription complex subunit 10 isoform 3                            | 0.96 | 0.96 | 0.92 | 1.06 | 5.54E-01 | 4.42E-01 | 9.82E-01 | 9.74E-01 |
| NP_005572.2    | BCAM       | basal cell adhesion molecule isoform 1 precursor                               | 1.05 | 1.04 | 1.08 | 1.27 | 6.90E-01 | 5.96E-01 | 9.41E-01 | 9.13E-01 |
| NP_036323.2    | NAA80      | N-alpha-acetyltransferase 80 isoform 1                                         | 0.98 | 1.20 | 1.16 | 1.26 | 8.88E-01 | 8.44E-01 | 4.79E-01 | 3.52E-01 |
| NP_001035521.1 | COA3       | cytochrome c oxidase assembly factor 3 homolog, mitochondrial                  | 1.29 | 0.76 | 0.98 | 1.32 | 4.83E-02 | 1.22E-02 | 5.23E-02 | 5.95E-03 |
| XP_011528002.1 | SLC19A1    | reduced folate transporter isoform X4                                          | 0.95 | 0.93 | 0.90 | 1.14 | 6.34E-01 | 5.30E-01 | 9.09E-01 | 8.67E-01 |
| NP_001317627.1 | YTHDC1     | YTH domain-containing protein 1 isoform 3                                      | 1.63 | 0.83 | 1.21 | 1.36 | 4.14E-01 | 2.93E-01 | 4.08E-01 | 2.79E-01 |
| NP_001120872.1 | YPEL5      | protein yippee-like 5                                                          | 1.05 | 0.93 | 0.98 | 0.92 | 4.48E-01 | 3.28E-01 | 2.99E-01 | 1.76E-01 |
| NP_005139.1    | UNC119     | protein unc-119 homolog A isoform a                                            | 1.04 | 0.84 | 0.88 | 1.08 | 7.59E-01 | 6.79E-01 | 3.36E-01 | 2.10E-01 |
| NP_001191819.1 | ISY1-RAB43 | ISY1-RAB43 protein                                                             | 0.69 | 0.86 | 0.60 | 1.20 | 6.72E-02 | 2.16E-02 | 1.46E-01 | 5.79E-02 |
| NP_963839.1    | LGALS8     | galectin-8 isoform a                                                           | 0.96 | 1.11 | 1.07 | 1.20 | 4.23E-01 | 3.04E-01 | 1.15E-01 | 3.83E-02 |
| NP_057023.2    | TRMT6      | tRNA (adenine(58)-N(1))-methyltransferase non-catalytic subunit TRM6 isoform 1 | 1.07 | 1.01 | 1.06 | 1.68 | 8.14E-01 | 7.45E-01 | 8.72E-01 | 8.19E-01 |
| NP_008820.3    | CD86       | T-lymphocyte activation antigen CD86 isoform 2 precursor                       | 1.03 | 0.92 | 0.95 | 1.10 | 8.62E-01 | 8.06E-01 | 5.08E-01 | 3.83E-01 |
| XP_016859884.1 | PPM1B      | protein phosphatase 1B isoform X1                                              | 1.09 | 0.99 | 1.08 | 1.13 | 1.39E-01 | 6.53E-02 | 1.69E-01 | 7.33E-02 |
| NP_112202.2    | ISCA1      | iron-sulfur cluster assembly 1 homolog, mitochondrial precursor                | 1.08 | 0.84 | 0.92 | 1.50 | 8.88E-01 | 8.43E-01 | 5.57E-01 | 4.34E-01 |
| NP_001278.1    | CLCN7      | H(+)/Cl(-) exchange transporter 7 isoform a                                    | 1.15 | 0.82 | 0.95 | 1.17 | 1.28E-01 | 5.79E-02 | 9.50E-02 | 2.70E-02 |
| NP_055254.2    | IL37       | interleukin-37 isoform 1 precursor                                             | 4.44 | 0.22 | 0.69 | 1.21 | 2.70E-01 | 1.67E-01 | 1.68E-01 | 7.28E-02 |
| NP_115497.4    | MAGT1      | magnesium transporter protein 1 isoform 2                                      | 0.95 | 1.02 | 0.96 | 1.04 | 1.97E-01 | 1.07E-01 | 3.93E-01 | 2.64E-01 |
| NP_001036053.1 | SNUPN      | snurportin-1                                                                   | 0.95 | 0.99 | 0.94 | 1.08 | 1.17E-01 | 5.07E-02 | 3.25E-01 | 2.01E-01 |
| NP_055569.1    | PTDSS1     | phosphatidylserine synthase 1 isoform 1                                        | 1.13 | 1.00 | 1.13 | 1.03 | 4.83E-02 | 1.22E-02 | 1.02E-01 | 3.02E-02 |
| NP_060621.3    | RIF1       | telomere-associated protein RIF1 isoform 1                                     | 0.92 | 0.90 | 0.83 | 1.07 | 6.96E-01 | 6.04E-01 | 9.47E-01 | 9.25E-01 |
| NP_004519.1    | MGST3      | microsomal glutathione S-transferase 3                                         | 0.96 | 1.00 | 0.96 | 0.90 | 3.97E-01 | 2.77E-01 | 4.65E-01 | 3.37E-01 |
| XP_024307962.1 | TFIP11     | tuftelin-interacting protein 11 isoform X1                                     | 1.01 | 1.05 | 1.06 | 1.19 | 7.94E-01 | 7.22E-01 | 7.04E-01 | 6.03E-01 |
| NP_065777.1    | NLN        | neurolysin, mitochondrial                                                      | 1.06 | 1.04 | 1.10 | 1.08 | 1.16E-01 | 4.95E-02 | 3.88E-01 | 2.59E-01 |

|                |              |                                                                                       |      |      |      |      |          |          |          |          |
|----------------|--------------|---------------------------------------------------------------------------------------|------|------|------|------|----------|----------|----------|----------|
| NP_705582.1    | UXT          | protein UXT isoform 1                                                                 | 1.01 | 1.09 | 1.09 | 1.16 | 9.91E-01 | 9.88E-01 | 7.57E-01 | 6.71E-01 |
| NP_001333396.1 | ANO10        | anoctamin-10 isoform 7                                                                | 1.10 | 0.95 | 1.03 | 0.99 | 3.36E-01 | 2.20E-01 | 5.84E-01 | 4.69E-01 |
| NP_689480.2    | RNF185       | E3 ubiquitin-protein ligase RNF185 isoform 1                                          | 1.01 | 0.97 | 0.98 | 1.02 | 8.90E-01 | 8.47E-01 | 7.14E-01 | 6.16E-01 |
| NP_077284.2    | DHRS11       | dehydrogenase/reductase SDR family member 11 precursor                                | 0.93 | 1.12 | 1.03 | 0.96 | 5.61E-01 | 4.50E-01 | 4.18E-01 | 2.90E-01 |
| XP_006716872.1 | GBA2         | non-lysosomal glucosylceramidase isoform X1                                           | 1.34 | 0.72 | 0.97 | 1.12 | 2.46E-01 | 1.45E-01 | 1.17E-01 | 3.92E-02 |
| NP_001189.2    | PRDM1        | PR domain zinc finger protein 1 isoform 1                                             | 0.96 | 1.02 | 0.97 | 0.99 | 5.79E-01 | 4.69E-01 | 4.99E-01 | 3.73E-01 |
| NP_001185838.1 | ATP6V1F      | V-type proton ATPase subunit F isoform 2                                              | 0.90 | 1.07 | 0.96 | 1.08 | 1.86E-01 | 9.89E-02 | 1.75E-01 | 7.82E-02 |
| XP_016883167.1 | ROMO1        | reactive oxygen species modulator 1 isoform X1                                        | 1.12 | 1.05 | 1.17 | 1.15 | 1.53E-01 | 7.46E-02 | 4.16E-01 | 2.88E-01 |
| NP_683759.1    | NSUN5        | probable 28S rRNA (cytosine-C(5))-methyltransferase isoform 1                         | 1.10 | 0.90 | 0.98 | 1.01 | 1.57E-01 | 7.79E-02 | 3.08E-01 | 1.85E-01 |
| XP_016879247.1 | SPNS1        | protein spinster homolog 1 isoform X2                                                 | 0.85 | 0.84 | 0.73 | 0.86 | 4.92E-01 | 3.75E-01 | 9.95E-01 | 9.94E-01 |
| XP_016884510.1 | KLHL22       | kelch-like protein 22 isoform X4                                                      | 1.06 | 0.79 | 0.79 | 0.85 | 9.89E-01 | 9.85E-01 | 7.23E-01 | 6.27E-01 |
| NP_001106878.1 | LDB1         | LIM domain-binding protein 1 isoform 1                                                | 0.88 | 0.81 | 0.70 | 1.09 | 4.68E-01 | 3.50E-01 | 7.93E-01 | 7.15E-01 |
| NP_004837.1    | EIF4E2       | eukaryotic translation initiation factor 4E type 2 isoform A                          | 1.01 | 0.98 | 0.99 | 1.03 | 8.37E-01 | 7.74E-01 | 5.41E-01 | 4.19E-01 |
| NP_444504.1    | GLMN         | glomulin isoform 1                                                                    | 1.15 | 0.76 | 0.87 | 1.16 | 4.02E-01 | 2.82E-01 | 1.30E-01 | 4.75E-02 |
| NP_036551.3    | RGS17        | regulator of G-protein signaling 17                                                   | 2.11 | 0.46 | 0.94 | 1.55 | 1.13E-01 | 4.79E-02 | 8.93E-02 | 2.36E-02 |
| NP_001257823.1 | TRAPPC3      | trafficking protein particle complex subunit 3 isoform 2                              | 1.06 | 1.03 | 1.08 | 1.02 | 7.37E-01 | 6.52E-01 | 8.97E-01 | 8.51E-01 |
| NP_001177376.1 | PPP2R3A      | serine/threonine-protein phosphatase 2A regulatory subunit B" subunit alpha isoform 3 | 0.94 | 1.03 | 0.97 | 1.20 | 8.02E-02 | 2.83E-02 | 8.15E-01 | 7.42E-01 |
| XP_024304548.1 | CD151        | CD151 antigen isoform X1                                                              | 0.93 | 1.02 | 0.95 | 1.04 | 5.39E-03 | 1.75E-04 | 1.54E-01 | 6.26E-02 |
| NP_001229338.1 | GAREM1       | GRB2-associated and regulator of MAPK protein 1 isoform 1                             | 1.09 | 1.03 | 1.10 | 0.99 | 8.48E-01 | 7.88E-01 | 9.15E-01 | 8.77E-01 |
| XP_006718581.1 | KCTD21       | BTB/POZ domain-containing protein KCTD21 isoform X2                                   | 1.03 | 0.87 | 0.89 | 1.25 | 3.81E-01 | 2.63E-01 | 7.09E-02 | 1.37E-02 |
| XP_006720617.1 | HDFGL3       | hepatoma-derived growth factor-related protein 3 isoform X1                           | 0.78 | 1.03 | 0.80 | 0.84 | 1.82E-01 | 9.57E-02 | 1.76E-01 | 8.00E-02 |
| NP_115512.3    | TKTL2        | transketolase-like protein 2                                                          | 0.86 | 1.04 | 0.90 | 0.97 | 2.47E-01 | 1.46E-01 | 2.03E-01 | 9.88E-02 |
| NP_077740.1    | DSC2         | desmocollin-2 isoform Dsc2a                                                           | 1.31 | 1.08 | 1.41 | 1.06 | 6.46E-02 | 2.03E-02 | 1.54E-01 | 6.26E-02 |
| XP_024308944.1 | LOXL3        | lysyl oxidase homolog 3 isoform X1                                                    | 1.13 | 1.03 | 1.15 | 1.20 | 2.70E-01 | 1.67E-01 | 7.35E-01 | 6.44E-01 |
| NP_002171.2    | IGHMBP2      | DNA-binding protein SMUBP-2                                                           | 1.37 | 1.01 | 1.38 | 1.52 | 2.52E-03 | 4.43E-05 | 5.66E-01 | 4.47E-01 |
| NP_056943.1    | GTF2A1       | transcription initiation factor IIA subunit 1 isoform 1                               | 0.86 | 0.97 | 0.83 | 1.06 | 3.12E-01 | 2.01E-01 | 4.73E-01 | 3.45E-01 |
| NP_851939.1    | FKBP7        | peptidyl-prolyl cis-trans isomerase FKBP7 isoform a precursor                         | 0.86 | 1.10 | 0.94 | 1.08 | 7.83E-02 | 2.73E-02 | 2.36E-01 | 1.23E-01 |
| NP_001305687.1 | NFX1         | transcriptional repressor NF-X1 isoform 4                                             | 0.93 | 1.03 | 0.96 | 1.10 | 5.57E-01 | 4.45E-01 | 5.41E-01 | 4.19E-01 |
| NP_001291937.1 | LNPK         | endoplasmic reticulum junction formation protein lunapark isoform 1 precursor         | 0.85 | 1.21 | 1.01 | 1.22 | 5.30E-01 | 4.15E-01 | 3.92E-01 | 2.62E-01 |
| NP_001005339.1 | RGS10        | regulator of G-protein signaling 10 isoform a                                         | 0.95 | 0.94 | 0.89 | 1.11 | 3.97E-01 | 2.76E-01 | 9.47E-01 | 9.24E-01 |
| NP_005834.4    | STAM2        | signal transducing adapter molecule 2                                                 | 1.18 | 1.06 | 1.25 | 1.14 | 2.38E-01 | 1.39E-01 | 4.34E-01 | 3.05E-01 |
| XP_024302667.1 | TAF6         | transcription initiation factor TFIID subunit 6 isoform X3                            | 0.90 | 0.91 | 0.81 | 0.89 | 2.30E-01 | 1.33E-01 | 9.92E-01 | 9.88E-01 |
| NP_055097.2    | HABP4        | intracellular hyaluronan-binding protein 4                                            | 0.77 | 1.00 | 0.77 | 0.91 | 2.36E-01 | 1.37E-01 | 2.51E-01 | 1.35E-01 |
| XP_016858358.1 | CD58         | lymphocyte function-associated antigen 3 isoform X1                                   | 0.80 | 1.10 | 0.88 | 1.05 | 8.19E-02 | 2.96E-02 | 8.42E-02 | 2.04E-02 |
| NP_001159725.2 | TBXAS1       | thromboxane-A synthase isoform 3                                                      | 1.09 | 1.35 | 1.48 | 1.19 | 1.45E-01 | 6.95E-02 | 2.15E-01 | 1.06E-01 |
| NP_060569.3    | FAR2         | fatty acyl-CoA reductase 2 isoform 1                                                  | 1.10 | 0.84 | 0.89 | 1.42 | 6.16E-01 | 5.11E-01 | 6.22E-01 | 5.10E-01 |
| XP_016874949.1 | ATP5MC2      | ATP synthase F(0) complex subunit C2, mitochondrial isoform X1                        | 1.16 | 0.84 | 0.97 | 0.97 | 2.27E-02 | 2.94E-03 | 5.20E-02 | 5.82E-03 |
| NP_004306.3    | ASAHI        | acid ceramidase isoform b                                                             | 0.99 | 1.05 | 1.03 | 1.21 | 8.89E-01 | 8.45E-01 | 7.30E-01 | 6.35E-01 |
| NP_001036038.1 | ENGASE       | cytosolic endo-beta-N-acetylglucosaminidase                                           | 1.15 | 0.92 | 1.06 | 1.20 | 1.81E-01 | 9.55E-02 | 2.17E-01 | 1.09E-01 |
| NP_037507.1    | ABT1         | activator of basal transcription 1                                                    | 0.88 | 1.06 | 0.93 | 1.01 | 3.40E-01 | 2.24E-01 | 2.84E-01 | 1.63E-01 |
| NP_644815.1    | CDC26        | anaphase-promoting complex subunit CDC26                                              | 1.23 | 0.91 | 1.12 | 1.42 | 1.23E-02 | 8.64E-04 | 6.05E-02 | 9.25E-03 |
| NP_076413.3    | BRD9         | bromodomain-containing protein 9 isoform 1                                            | 1.94 | 0.74 | 1.43 | 1.27 | 6.79E-03 | 2.67E-04 | 2.60E-02 | 1.39E-04 |
| NP_997238.2    | POTEB3       | POTE ankyrin domain family member B3                                                  | 0.58 | 1.24 | 0.72 | 0.86 | 2.86E-02 | 4.51E-03 | 5.68E-02 | 7.59E-03 |
| NP_061158.1    | BIN3         | bridging integrator 3 isoform 1                                                       | 1.23 | 0.68 | 0.83 | 0.85 | 1.43E-02 | 1.19E-03 | 1.51E-01 | 6.08E-02 |
| NP_005474.2    | CHAF1A       | chromatin assembly factor 1 subunit A                                                 | 1.72 | 0.62 | 1.02 | 1.13 | 1.81E-01 | 9.52E-02 | 1.63E-01 | 7.03E-02 |
| XP_003960032.2 | LOC101060017 | uncharacterized protein LOC101060017                                                  | 0.83 | 1.04 | 0.87 | 0.87 | 5.38E-02 | 1.52E-02 | 6.35E-02 | 1.03E-02 |
| NP_061836.2    | BRWD1        | bromodomain and WD repeat-containing protein 1 isoform A                              | 0.91 | 1.12 | 1.02 | 1.11 | 7.46E-02 | 2.53E-02 | 1.20E-01 | 4.09E-02 |

|                |            |                                                                                              |      |      |      |      |          |          |          |          |
|----------------|------------|----------------------------------------------------------------------------------------------|------|------|------|------|----------|----------|----------|----------|
| NP_065203.2    | YIF1A      | protein YIF1A isoform 1                                                                      | 1.10 | 0.85 | 0.93 | 1.21 | 4.46E-01 | 3.26E-01 | 2.85E-01 | 1.64E-01 |
| NP_057238.3    | RAB4B      | ras-related protein Rab-4B                                                                   | 1.56 | 0.85 | 1.28 | 1.29 | 2.36E-01 | 1.38E-01 | 2.93E-01 | 1.71E-01 |
| NP_002633.1    | PIGC       | phosphatidylinositol N-acetylglucosaminyltransferase subunit C                               | 1.10 | 1.06 | 1.18 | 1.09 | 5.92E-01 | 4.84E-01 | 8.68E-01 | 8.16E-01 |
| NP_066951.1    | POLR2L     | DNA-directed RNA polymerases I, II, and III subunit RPABC5                                   | 1.05 | 1.17 | 1.19 | 1.30 | 9.13E-01 | 8.75E-01 | 7.43E-01 | 6.53E-01 |
| NP_005265.1    | NGF5       | guanine nucleotide-binding protein G(I)/G(S)/G(O) subunit gamma-5 precursor                  | 1.26 | 1.31 | 1.65 | 1.28 | 1.39E-01 | 6.56E-02 | 7.13E-01 | 6.14E-01 |
| XP_016877195.1 | BRMS1L     | breast cancer metastasis-suppressor 1-like protein isoform X4                                | 0.80 | 1.25 | 1.00 | 0.89 | 7.20E-02 | 2.38E-02 | 7.18E-02 | 1.43E-02 |
| NP_001305699.1 | MRPL14     | 39S ribosomal protein L14, mitochondrial isoform c                                           | 1.03 | 0.92 | 0.95 | 1.05 | 4.76E-01 | 3.58E-01 | 4.58E-01 | 3.29E-01 |
| NP_006155.2    | NFE2L2     | nuclear factor erythroid 2-related factor 2 isoform 1                                        | 0.91 | 1.26 | 1.12 | 1.07 | 6.03E-01 | 4.97E-01 | 4.18E-01 | 2.90E-01 |
| NP_612423.1    | SGF29      | SAGA-associated factor 29                                                                    | 1.06 | 1.27 | 1.32 | 1.09 | 9.26E-01 | 8.91E-01 | 6.22E-01 | 5.10E-01 |
| XP_024306706.1 | PHF23      | PHD finger protein 23 isoform X1                                                             | 1.08 | 0.98 | 1.05 | 1.34 | 4.16E-01 | 2.95E-01 | 3.35E-01 | 2.08E-01 |
| NP_057733.2    | ESF1       | ESF1 homolog                                                                                 | 0.95 | 1.11 | 1.05 | 0.91 | 5.91E-01 | 4.82E-01 | 4.83E-01 | 3.56E-01 |
| XP_024307502.1 | C19orf12   | protein C19orf12 isoform X1                                                                  | 1.22 | 0.89 | 1.08 | 1.23 | 7.20E-02 | 2.39E-02 | 1.14E-01 | 3.70E-02 |
| XP_024306613.1 | USP36      | ubiquitin carboxyl-terminal hydrolase 36 isoform X1                                          | 1.00 | 0.97 | 0.95 | 1.20 | 9.68E-01 | 9.53E-01 | 9.31E-01 | 9.03E-01 |
| NP_653284.2    | DHRS13     | dehydrogenase/reductase SDR family member 13 precursor                                       | 1.73 | 0.72 | 1.20 | 1.32 | 2.30E-01 | 1.32E-01 | 1.85E-01 | 8.60E-02 |
| NP_001165077.1 | PREPL      | prolyl endopeptidase-like isoform 1                                                          | 1.07 | 1.38 | 1.49 | 1.07 | 6.31E-01 | 5.27E-01 | 3.71E-01 | 2.43E-01 |
| NP_872282.1    | COQ6       | ubiquinone biosynthesis monooxygenase COQ6, mitochondrial isoform a                          | 0.72 | 1.63 | 1.17 | 0.88 | 1.18E-02 | 8.04E-04 | 7.95E-02 | 1.78E-02 |
| NP_653265.3    | FAM76B     | protein FAM76B isoform 1                                                                     | 1.00 | 0.86 | 0.86 | 1.06 | 9.68E-01 | 9.54E-01 | 1.69E-01 | 7.35E-02 |
| NP_057394.3    | POLR3K     | DNA-directed RNA polymerase III subunit RPC10                                                | 1.08 | 0.97 | 1.05 | 1.02 | 3.19E-02 | 5.54E-03 | 6.41E-01 | 5.30E-01 |
| NP_006867.1    | B4GAT1     | beta-1,4-glucuronyltransferase 1                                                             | 1.01 | 1.01 | 1.01 | 0.99 | 9.37E-01 | 9.10E-01 | 9.54E-01 | 9.34E-01 |
| NP_004100.1    | FDX1       | adrenodoxin, mitochondrial precursor                                                         | 0.94 | 1.27 | 1.19 | 1.01 | 2.02E-01 | 1.11E-01 | 1.82E-01 | 8.32E-02 |
| NP_079051.9    | GEMIN6     | gem-associated protein 6                                                                     | 1.07 | 0.86 | 0.92 | 1.00 | 4.14E-01 | 2.94E-01 | 1.71E-01 | 7.52E-02 |
| NP_003963.1    | BTAFL      | TATA-binding protein-associated factor 172                                                   | 1.02 | 0.96 | 0.98 | 1.03 | 6.52E-01 | 5.53E-01 | 3.45E-01 | 2.18E-01 |
| NP_542408.1    | DYNLL2     | dynein light chain 2, cytoplasmic                                                            | 1.08 | 0.98 | 1.05 | 1.05 | 3.38E-02 | 6.19E-03 | 5.01E-02 | 5.19E-03 |
| NP_683725.1    | CYB5A      | cytochrome b5 isoform 1                                                                      | 1.05 | 0.83 | 0.85 | 1.04 | 8.53E-01 | 7.94E-01 | 5.27E-01 | 4.04E-01 |
| NP_116290.1    | COX14      | cytochrome c oxidase assembly protein COX14                                                  | 0.99 | 1.04 | 1.03 | 1.07 | 3.83E-01 | 2.64E-01 | 7.88E-02 | 1.71E-02 |
| NP_006457.2    | POLR3F     | DNA-directed RNA polymerase III subunit RPC6 isoform 1                                       | 0.97 | 1.01 | 0.98 | 1.09 | 2.39E-01 | 1.40E-01 | 6.99E-01 | 5.98E-01 |
| XP_005248298.1 | NADK2      | NAD kinase 2, mitochondrial isoform X1                                                       | 1.01 | 0.93 | 0.94 | 1.15 | 9.26E-01 | 8.92E-01 | 6.22E-01 | 5.09E-01 |
| NP_005189.2    | CHKB       | choline/ethanolamine kinase                                                                  | 0.80 | 1.03 | 0.82 | 1.02 | 5.56E-02 | 1.59E-02 | 8.10E-02 | 1.87E-02 |
| NP_001243125.1 | ARAF       | serine/threonine-protein kinase A-Raf isoform 2                                              | 0.67 | 1.54 | 1.05 | 0.97 | 6.70E-02 | 2.14E-02 | 2.70E-01 | 1.51E-01 |
| XP_016885463.1 | SYTL5      | synaptotagmin-like protein 5 isoform X1                                                      | 1.05 | 0.98 | 1.03 | 1.10 | 5.92E-01 | 4.84E-01 | 4.90E-01 | 3.63E-01 |
| NP_061326.1    | NDUFA12    | NADH dehydrogenase [ubiquinone] 1 alpha subcomplex subunit 12 isoform a                      | 0.93 | 1.03 | 0.96 | 0.96 | 8.43E-02 | 3.08E-02 | 1.06E-01 | 3.25E-02 |
| NP_001258563.1 | CNOT9      | CCR4-NOT transcription complex subunit 9 isoform 1                                           | 1.27 | 0.80 | 1.01 | 1.10 | 1.25E-01 | 5.62E-02 | 1.47E-01 | 5.84E-02 |
| NP_006406.1    | SPTLC1     | serine palmitoyltransferase 1 isoform a                                                      | 1.61 | 0.69 | 1.10 | 1.08 | 7.94E-02 | 2.77E-02 | 7.21E-02 | 1.46E-02 |
| NP_006627.2    | MTHFD2     | bifunctional methylenetetrahydrofolate dehydrogenase/cyclohydrolase, mitochondrial precursor | 1.41 | 0.87 | 1.23 | 1.04 | 5.49E-02 | 1.57E-02 | 5.83E-02 | 8.37E-03 |
| NP_068809.1    | POLR2F     | DNA-directed RNA polymerases I, II, and III subunit RPABC2 isoform 1                         | 0.78 | 1.01 | 0.78 | 0.88 | 3.46E-01 | 2.30E-01 | 3.86E-01 | 2.58E-01 |
| NP_060631.2    | NADSYN1    | glutamine-dependent NAD(+) synthetase                                                        | 0.88 | 0.99 | 0.88 | 0.99 | 3.81E-01 | 2.63E-01 | 7.53E-01 | 6.66E-01 |
| XP_016884713.1 | SLC9A6     | sodium/hydrogen exchanger 6 isoform X1                                                       | 0.85 | 1.18 | 0.95 | 0.88 | 6.84E-01 | 5.90E-01 | 5.61E-01 | 4.41E-01 |
| NP_056437.4    | CCZ1       | vacuolar fusion protein CCZ1 homolog                                                         | 0.82 | 1.36 | 1.09 | 1.02 | 4.52E-01 | 3.33E-01 | 2.45E-01 | 1.30E-01 |
| NP_001004304.1 | ZNF740     | zinc finger protein 740                                                                      | 1.56 | 0.95 | 1.49 | 1.28 | 3.84E-02 | 7.92E-03 | 1.32E-01 | 4.84E-02 |
| NP_005515.1    | HES1       | transcription factor HES-1                                                                   | 0.74 | 1.12 | 0.84 | 1.14 | 6.20E-02 | 1.89E-02 | 6.73E-02 | 1.20E-02 |
| NP_001268400.1 | PIPK5K2    | inositol hexakisphosphate and diphosphoinositol-pentakisphosphate kinase 2 isoform 3         | 1.02 | 1.00 | 1.03 | 1.09 | 8.86E-02 | 3.32E-02 | 8.61E-01 | 8.05E-01 |
| NP_079131.3    | ACTR5      | actin-related protein 5                                                                      | 1.03 | 0.92 | 0.93 | 1.18 | 9.34E-01 | 9.05E-01 | 7.09E-01 | 6.09E-01 |
| NP_932064.1    | DPP8       | dipeptidyl peptidase 8 isoform 3                                                             | 1.02 | 0.96 | 0.98 | 1.06 | 2.53E-01 | 1.51E-01 | 9.92E-02 | 2.88E-02 |
| NP_036311.3    | FBXO7      | F-box only protein 7 isoform 1                                                               | 0.85 | 1.06 | 0.90 | 1.13 | 1.21E-01 | 5.35E-02 | 2.65E-01 | 1.46E-01 |
| NP_998760.1    | ISCU       | iron-sulfur cluster assembly enzyme ISCU, mitochondrial isoform 2 precursor                  | 0.87 | 1.04 | 0.91 | 1.15 | 3.73E-02 | 7.56E-03 | 9.94E-02 | 2.90E-02 |
| NP_542387.1    | CDKN2AIPNL | CDKN2AIP N-terminal-like protein                                                             | 0.72 | 0.97 | 0.70 | 0.81 | 2.67E-02 | 4.02E-03 | 8.02E-02 | 1.83E-02 |
| NP_116295.1    | PYURF      | protein pre-Y, mitochondrial precursor                                                       | 0.81 | 1.01 | 0.82 | 0.98 | 1.55E-01 | 7.65E-02 | 1.86E-01 | 8.64E-02 |

|                |          |                                                                                           |      |      |      |      |          |          |          |          |
|----------------|----------|-------------------------------------------------------------------------------------------|------|------|------|------|----------|----------|----------|----------|
| XP_024309867.1 | FHL3     | four and a half LIM domains protein 3 isoform X1                                          | 0.79 | 0.94 | 0.74 | 0.95 | 9.90E-02 | 3.90E-02 | 3.03E-01 | 1.80E-01 |
| NP_056357.1    | UPF2     | regulator of nonsense transcripts 2                                                       | 1.03 | 0.99 | 1.02 | 1.07 | 8.18E-01 | 7.50E-01 | 7.37E-01 | 6.46E-01 |
| NP_001358171.1 | CRYBG1   | beta/gamma crystallin domain-containing protein 1 isoform 1                               | 0.95 | 0.94 | 0.89 | 1.04 | 5.04E-02 | 1.32E-02 | 9.20E-01 | 8.84E-01 |
| XP_016880482.1 | TNFAIP1  | BTB/POZ domain-containing adapter for CUL3-mediated RhoA degradation protein 2 isoform X1 | 0.44 | 1.39 | 0.61 | 0.56 | 1.07E-02 | 6.41E-04 | 4.16E-02 | 2.57E-03 |
| NP_001037770.1 | SMAP1    | stromal membrane-associated protein 1 isoform A                                           | 0.88 | 1.05 | 0.92 | 0.90 | 6.79E-03 | 2.67E-04 | 4.84E-01 | 3.57E-01 |
| NP_001001132.1 | ITSN1    | intersectin-1 isoform ITSN-s                                                              | 1.22 | 0.72 | 0.87 | 1.15 | 2.57E-01 | 1.55E-01 | 2.58E-01 | 1.40E-01 |
| NP_000518.1    | LDLR     | low-density lipoprotein receptor isoform 1 precursor                                      | 1.16 | 1.37 | 1.63 | 1.39 | 7.78E-01 | 7.01E-01 | 6.54E-01 | 5.48E-01 |
| NP_068375.3    | VPS11    | vacuolar protein sorting-associated protein 11 homolog isoform 1                          | 1.15 | 0.75 | 0.86 | 1.13 | 2.54E-01 | 1.52E-01 | 9.07E-02 | 2.46E-02 |
| XP_016859015.1 | DNMT3A   | DNA (cytosine-5)-methyltransferase 3A isoform X1                                          | 0.79 | 1.07 | 0.84 | 1.06 | 7.80E-02 | 2.71E-02 | 1.54E-01 | 6.31E-02 |
| NP_060813.2    | RIOK2    | serine/threonine-protein kinase RIO2 isoform 1                                            | 0.95 | 1.10 | 1.05 | 1.05 | 4.42E-01 | 3.23E-01 | 1.57E-01 | 6.53E-02 |
| XP_005266564.1 | SLC7A1   | high affinity cationic amino acid transporter 1 isoform X2                                | 1.06 | 1.12 | 1.19 | 1.10 | 5.52E-01 | 4.39E-01 | 7.53E-01 | 6.65E-01 |
| NP_115732.2    | NAA38    | N-alpha-acetyltransferase 38, NatC auxiliary subunit isoform 1 precursor                  | 1.24 | 0.86 | 1.07 | 1.02 | 1.56E-01 | 7.74E-02 | 1.21E-01 | 4.14E-02 |
| NP_000190.1    | SGSH     | N-sulphoglucosamine sulphohydrolase isoform 1 precursor                                   | 1.08 | 0.88 | 0.96 | 1.23 | 2.27E-01 | 1.31E-01 | 9.02E-02 | 2.40E-02 |
| NP_115737.1    | THOC3    | THO complex subunit 3 isoform 1                                                           | 1.25 | 0.83 | 1.03 | 1.18 | 5.36E-02 | 1.50E-02 | 6.34E-02 | 1.02E-02 |
| XP_016857596.1 | NMNAT1   | nicotinamide/nicotinic acid mononucleotide adenylyltransferase 1 isoform X1               | 1.27 | 0.81 | 0.97 | 0.97 | 6.78E-01 | 5.83E-01 | 4.75E-01 | 3.48E-01 |
| NP_004698.3    | ATG12    | ubiquitin-like protein ATG12 isoform 1                                                    | 1.00 | 1.02 | 1.02 | 1.04 | 9.75E-01 | 9.63E-01 | 7.74E-01 | 6.91E-01 |
| XP_024308775.1 | DPYSL5   | dihydropyrimidinase-related protein 5 isoform X1                                          | 1.08 | 0.97 | 1.04 | 0.93 | 1.42E-01 | 6.78E-02 | 1.34E-01 | 4.96E-02 |
| XP_016862616.1 | WNT5A    | protein Wnt-5a isoform X1                                                                 | 0.87 | 0.83 | 0.72 | 0.81 | 3.89E-02 | 8.17E-03 | 4.57E-01 | 3.28E-01 |
| NP_001137384.1 | FAM76A   | protein FAM76A isoform 1                                                                  | 0.86 | 1.09 | 0.92 | 1.26 | 3.09E-01 | 1.98E-01 | 5.11E-01 | 3.88E-01 |
| XP_024309948.1 | TRAPPC11 | trafficking protein particle complex subunit 11 isoform X1                                | 1.27 | 0.81 | 1.02 | 0.98 | 2.21E-01 | 1.26E-01 | 1.18E-01 | 3.95E-02 |
| NP_542409.1    | UBE2F    | NEDD8-conjugating enzyme UBE2F isoform 1                                                  | 1.03 | 1.06 | 1.10 | 1.32 | 7.04E-01 | 6.15E-01 | 7.50E-01 | 6.62E-01 |
| XP_011538877.1 | FHAD1    | forkhead-associated domain-containing protein 1 isoform X1                                | 0.68 | 1.19 | 0.80 | 0.83 | 4.46E-02 | 1.05E-02 | 5.95E-02 | 8.75E-03 |
| XP_016875257.1 | BCAT1    | branched-chain-amino-acid aminotransferase, cytosolic isoform X1                          | 0.96 | 1.22 | 1.17 | 1.05 | 9.33E-02 | 3.55E-02 | 5.00E-02 | 4.99E-03 |
| NP_060060.3    | ZC3H7B   | zinc finger CCCH domain-containing protein 7B                                             | 0.93 | 0.89 | 0.83 | 1.06 | 2.90E-01 | 1.83E-01 | 4.66E-01 | 3.39E-01 |
| NP_001308658.1 | EXOC6B   | exocyst complex component 6B isoform 1                                                    | 0.85 | 1.09 | 0.90 | 0.72 | 6.03E-01 | 4.98E-01 | 5.11E-01 | 3.88E-01 |
| NP_001035958.1 | SMIM8    | small integral membrane protein 8 isoform 1                                               | 0.79 | 1.51 | 1.15 | 0.89 | 4.49E-01 | 3.30E-01 | 2.34E-01 | 1.21E-01 |
| NP_037451.1    | UBIAD1   | ubiA prenyltransferase domain-containing protein 1 isoform 1                              | 1.04 | 0.93 | 0.97 | 1.04 | 1.70E-01 | 8.76E-02 | 9.42E-02 | 2.66E-02 |
| XP_011532165.1 | QRICH1   | glutamine-rich protein 1 isoform X1                                                       | 1.08 | 0.85 | 0.89 | 0.89 | 8.64E-01 | 8.10E-01 | 5.68E-01 | 4.52E-01 |
| NP_859056.2    | LYRM7    | complex III assembly factor LYRM7 isoform 1                                               | 1.07 | 1.08 | 1.16 | 1.14 | 2.88E-01 | 1.81E-01 | 9.96E-01 | 9.95E-01 |
| XP_024305880.1 | NUF2     | kinetochore protein Nuf2 isoform X1                                                       | 1.25 | 0.69 | 0.78 | 0.93 | 8.13E-01 | 7.44E-01 | 4.91E-01 | 3.64E-01 |
| NP_001505.1    | GTF2B    | transcription initiation factor IIB                                                       | 0.97 | 1.00 | 0.94 | 1.05 | 8.73E-01 | 8.21E-01 | 9.42E-01 | 9.16E-01 |
| NP_005972.1    | TSPAN31  | tetraspanin-31 isoform 1                                                                  | 0.91 | 0.90 | 0.82 | 1.00 | 6.61E-02 | 2.10E-02 | 6.43E-01 | 5.33E-01 |
| XP_006722863.1 | MAP2K7   | dual specificity mitogen-activated protein kinase kinase 7 isoform X1                     | 1.05 | 1.03 | 1.08 | 1.13 | 2.46E-01 | 1.45E-01 | 7.30E-01 | 6.36E-01 |
| NP_001191330.1 | XIAP     | E3 ubiquitin-protein ligase XIAP                                                          | 0.90 | 0.88 | 0.79 | 1.14 | 3.53E-02 | 6.74E-03 | 7.75E-01 | 6.92E-01 |
| NP_008879.3    | HSPA13   | heat shock 70 kDa protein 13 precursor                                                    | 0.90 | 1.06 | 0.95 | 0.98 | 4.99E-01 | 3.81E-01 | 3.95E-01 | 2.66E-01 |
| NP_056518.2    | RRP7A    | ribosomal RNA-processing protein 7 homolog A                                              | 1.17 | 0.93 | 1.08 | 1.16 | 2.69E-01 | 1.65E-01 | 2.34E-01 | 1.21E-01 |
| NP_001026866.1 | PLD3     | phospholipase D3                                                                          | 0.92 | 1.15 | 1.05 | 1.18 | 1.58E-01 | 7.86E-02 | 1.15E-01 | 3.76E-02 |
| NP_061940.1    | GNL3L    | guanine nucleotide-binding protein-like 3-like protein                                    | 0.91 | 1.03 | 0.94 | 0.90 | 5.64E-01 | 4.53E-01 | 5.51E-01 | 4.29E-01 |
| NP_001349853.1 | ASAP1    | arf-GAP with SH3 domain, ANK repeat and PH domain-containing protein 1 isoform 3          | 0.86 | 0.81 | 0.70 | 1.10 | 1.08E-01 | 4.47E-02 | 5.66E-01 | 4.46E-01 |
| NP_001269970.1 | USP25    | ubiquitin carboxyl-terminal hydrolase 25 isoform USP25m                                   | 1.30 | 0.87 | 1.20 | 1.28 | 6.17E-01 | 5.12E-01 | 5.10E-01 | 3.86E-01 |
| NP_076931.1    | MRPL57   | ribosomal protein 63, mitochondrial                                                       | 1.02 | 1.00 | 1.02 | 1.10 | 8.53E-01 | 7.94E-01 | 9.11E-01 | 8.69E-01 |
| XP_024304935.1 | SUOX     | sulfite oxidase, mitochondrial isoform X1                                                 | 1.18 | 0.87 | 1.02 | 1.11 | 1.17E-01 | 5.08E-02 | 8.12E-02 | 1.89E-02 |
| NP_060871.1    | STK32B   | serine/threonine-protein kinase 32B isoform 1                                             | 0.83 | 1.12 | 0.96 | 0.99 | 4.38E-01 | 3.18E-01 | 4.16E-01 | 2.88E-01 |
| XP_024309954.1 | KIFAP3   | kinesin-associated protein 3 isoform X1                                                   | 0.95 | 1.00 | 0.95 | 0.96 | 5.13E-01 | 3.97E-01 | 7.82E-01 | 7.02E-01 |
| NP_004891.5    | APOBEC3B | DNA dC-dU-editing enzyme APOBEC-3B isoform a                                              | 1.04 | 0.87 | 0.90 | 1.06 | 8.32E-01 | 7.68E-01 | 3.67E-01 | 2.38E-01 |
| NP_004749.2    | TSPOAPI  | peripheral-type benzodiazepine receptor-associated protein 1 isoform a                    | 1.27 | 0.82 | 1.01 | 1.15 | 6.17E-01 | 5.12E-01 | 4.11E-01 | 2.83E-01 |
| NP_057191.2    | ZFR      | zinc finger RNA-binding protein                                                           | 1.09 | 0.96 | 1.02 | 1.06 | 9.15E-01 | 8.77E-01 | 8.46E-01 | 7.84E-01 |



|                |          |                                                                                        |      |      |      |      |          |          |          |          |
|----------------|----------|----------------------------------------------------------------------------------------|------|------|------|------|----------|----------|----------|----------|
| NP_005597.3    | LGMN     | legumain isoform 1                                                                     | 1.00 | 1.00 | 1.00 | 1.23 | 9.87E-01 | 9.81E-01 | 9.74E-01 | 9.61E-01 |
| XP_011525416.1 | SMG9     | protein SMG9 isoform X1                                                                | 0.97 | 0.95 | 0.92 | 0.98 | 3.09E-01 | 1.98E-01 | 4.60E-01 | 3.32E-01 |
| NP_116114.1    | BUD13    | BUD13 homolog isoform 1                                                                | 0.86 | 0.91 | 0.78 | 0.84 | 5.47E-01 | 4.34E-01 | 8.19E-01 | 7.47E-01 |
| XP_005266130.1 | GRIN1    | glutamate receptor ionotropic, NMDA 1 isoform X1                                       | 1.23 | 0.92 | 1.13 | 1.08 | 8.03E-02 | 2.85E-02 | 1.25E-01 | 4.35E-02 |
| XP_011535455.1 | OR4K1    | olfactory receptor 4K1 isoform X1                                                      | 1.19 | 0.98 | 1.17 | 1.16 | 3.49E-02 | 6.63E-03 | 1.23E-01 | 4.26E-02 |
| NP_004323.2    | BPHL     | valacyclovir hydrolase isoform 1 precursor                                             | 1.76 | 0.92 | 1.45 | 1.35 | 1.92E-01 | 1.03E-01 | 4.66E-01 | 3.39E-01 |
| NP_663318.1    | APOL1    | apolipoprotein L1 isoform b precursor                                                  | 0.96 | 1.00 | 0.96 | 1.06 | 7.26E-01 | 6.38E-01 | 7.28E-01 | 6.33E-01 |
| XP_005267487.1 | DAAM1    | disheveled-associated activator of morphogenesis 1 isoform X1                          | 1.25 | 0.70 | 0.86 | 1.15 | 3.68E-01 | 2.50E-01 | 1.88E-01 | 8.79E-02 |
| NP_001352832.1 | MAG11    | membrane-associated guanylate kinase, WW and PDZ domain-containing protein 1 isoform d | 1.27 | 0.91 | 1.15 | 1.35 | 1.95E-01 | 1.06E-01 | 2.32E-01 | 1.20E-01 |
| NP_001478.2    | BLOC1S1  | biogenesis of lysosome-related organelles complex 1 subunit 1                          | 0.94 | 1.05 | 0.99 | 1.23 | 2.70E-01 | 1.67E-01 | 3.10E-01 | 1.87E-01 |
| NP_001020114.1 | ASL      | argininosuccinate lyase isoform 1                                                      | 1.00 | 0.82 | 0.82 | 0.80 | 9.98E-01 | 9.98E-01 | 1.11E-01 | 3.50E-02 |
| XP_006721823.1 | TRIM65   | tripartite motif-containing protein 65 isoform X1                                      | 1.35 | 0.66 | 0.89 | 1.19 | 1.01E-02 | 5.32E-04 | 3.53E-02 | 1.42E-03 |
| NP_997705.1    | E2F6     | transcription factor E2F6 isoform 4                                                    | 1.33 | 1.08 | 1.43 | 1.04 | 5.04E-01 | 3.87E-01 | 6.30E-01 | 5.19E-01 |
| NP_004123.1    | HABP2    | hyaluronan-binding protein 2 isoform 1                                                 | 1.32 | 0.85 | 1.12 | 1.02 | 2.56E-01 | 1.54E-01 | 2.01E-01 | 9.74E-02 |
| XP_011512454.1 | OTULIN   | ubiquitin thioesterase otulin isoform X1                                               | 1.22 | 0.81 | 0.99 | 0.97 | 1.89E-02 | 2.13E-03 | 3.69E-02 | 2.00E-03 |
| XP_005249573.1 | DNAJB6   | dnaJ homolog subfamily B member 6 isoform X1                                           | 0.90 | 0.96 | 0.85 | 0.93 | 4.02E-01 | 2.82E-01 | 6.48E-01 | 5.42E-01 |
| XP_016872328.1 | PYROXD2  | pyridine nucleotide-disulfide oxidoreductase domain-containing protein 2 isoform X4    | 0.85 | 0.80 | 0.68 | 0.90 | 3.12E-01 | 2.01E-01 | 7.10E-01 | 6.10E-01 |
| NP_612467.1    | WDR92    | WD repeat-containing protein 92 isoform 1                                              | 1.09 | 0.94 | 1.03 | 1.23 | 6.81E-01 | 5.86E-01 | 5.01E-01 | 3.76E-01 |
| NP_620137.2    | FCHO2    | F-BAR domain only protein 2 isoform a                                                  | 1.05 | 0.82 | 0.85 | 1.00 | 1.73E-01 | 9.01E-02 | 5.11E-02 | 5.45E-03 |
| NP_001229546.1 | NXT2     | NTF2-related export protein 2 isoform 2                                                | 1.14 | 0.89 | 1.01 | 1.13 | 1.36E-02 | 1.09E-03 | 7.21E-02 | 1.47E-02 |
| NP_443167.4    | NT5C3B   | 7-methylguanosine phosphate-specific 5'-nucleotidase                                   | 0.84 | 1.10 | 0.92 | 1.06 | 1.42E-01 | 6.76E-02 | 1.84E-01 | 8.54E-02 |
| NP_006209.2    | PIK3CA   | phosphatidylinositol 4,5-bisphosphate 3-kinase catalytic subunit alpha isoform         | 0.82 | 1.35 | 1.11 | 0.75 | 2.86E-01 | 1.80E-01 | 1.15E-01 | 3.77E-02 |
| XP_011539223.1 | FAAP20   | Fanconi anemia core complex-associated protein 20 isoform X4                           | 0.98 | 0.95 | 0.93 | 1.11 | 5.42E-01 | 4.28E-01 | 5.68E-01 | 4.51E-01 |
| NP_001339443.1 | HLCS     | biotin--protein ligase isoform 2                                                       | 1.09 | 0.90 | 0.98 | 1.13 | 3.25E-02 | 5.73E-03 | 2.74E-01 | 1.55E-01 |
| XP_005250053.1 | RAB19    | ras-related protein Rab-19 isoform X1                                                  | 2.00 | 1.32 | 2.78 | 1.57 | 1.18E-01 | 5.11E-02 | 4.66E-01 | 3.39E-01 |
| NP_057034.2    | MRPL2    | 39S ribosomal protein L2, mitochondrial isoform 1                                      | 0.96 | 1.08 | 1.04 | 1.19 | 5.54E-01 | 4.41E-01 | 2.73E-01 | 1.53E-01 |
| NP_001127703.1 | NT5DC2   | 5'-nucleotidase domain-containing protein 2 isoform 1                                  | 0.91 | 0.96 | 0.87 | 0.85 | 5.02E-01 | 3.84E-01 | 7.54E-01 | 6.68E-01 |
| XP_011523846.1 | HELZ     | probable helicase with zinc finger domain isoform X1                                   | 0.94 | 1.31 | 1.24 | 1.10 | 3.64E-02 | 7.17E-03 | 3.33E-01 | 2.07E-01 |
| NP_004468.1    | FRG1     | protein FRG1                                                                           | 0.96 | 0.89 | 0.86 | 1.03 | 4.17E-01 | 2.97E-01 | 2.63E-01 | 1.45E-01 |
| NP_001350485.1 | PAAF1    | proteasomal ATPase-associated factor 1 isoform 4                                       | 1.03 | 0.99 | 1.02 | 1.01 | 1.85E-01 | 9.80E-02 | 4.99E-01 | 3.73E-01 |
| NP_002951.1    | S100A3   | protein S100-A3                                                                        | 0.95 | 0.83 | 0.79 | 0.89 | 5.23E-01 | 4.08E-01 | 4.59E-01 | 3.31E-01 |
| XP_011543064.1 | XRRA1    | X-ray radiation resistance-associated protein 1 isoform X10                            | 2.08 | 0.67 | 1.40 | 2.05 | 1.45E-02 | 1.23E-03 | 3.53E-02 | 1.65E-03 |
| XP_005246454.1 | FN1      | fibronectin isoform X1                                                                 | 0.92 | 0.82 | 0.75 | 0.98 | 6.35E-01 | 5.33E-01 | 6.46E-01 | 5.36E-01 |
| NP_150232.2    | TRIM15   | tripartite motif-containing protein 15                                                 | 0.90 | 1.10 | 0.98 | 1.02 | 5.17E-01 | 4.02E-01 | 4.11E-01 | 2.83E-01 |
| NP_852136.1    | RFC2     | replication factor C subunit 2 isoform 1                                               | 1.19 | 0.90 | 1.08 | 1.32 | 4.69E-01 | 3.51E-01 | 3.26E-01 | 2.02E-01 |
| NP_919269.2    | XIRP1    | xin actin-binding repeat-containing protein 1 isoform 1                                | 0.99 | 1.00 | 0.99 | 0.93 | 5.64E-01 | 4.54E-01 | 6.20E-01 | 5.07E-01 |
| NP_071322.2    | FBXW4    | F-box/WD repeat-containing protein 4 isoform 1                                         | 1.75 | 1.08 | 1.91 | 1.17 | 1.32E-02 | 1.00E-03 | 3.81E-01 | 2.52E-01 |
| NP_001129970.1 | CISD3    | CDGSH iron-sulfur domain-containing protein 3, mitochondrial precursor                 | 1.15 | 0.79 | 0.91 | 1.05 | 2.98E-02 | 4.89E-03 | 9.14E-02 | 2.50E-02 |
| NP_006846.1    | KDELR3   | ER lumen protein-retaining receptor 3 isoform a                                        | 1.27 | 0.81 | 1.02 | 0.99 | 3.68E-01 | 2.50E-01 | 1.94E-01 | 9.27E-02 |
| NP_001129107.1 | C11orf68 | UPF0696 protein C11orf68 isoform 1                                                     | 1.36 | 0.78 | 0.99 | 1.32 | 4.79E-01 | 3.62E-01 | 3.83E-01 | 2.54E-01 |
| XP_005269206.1 | NABP2    | SOSS complex subunit B1 isoform X3                                                     | 0.98 | 0.92 | 0.90 | 1.18 | 8.43E-01 | 7.82E-01 | 5.62E-01 | 4.42E-01 |
| XP_011512900.1 | BNIP5    | protein BNIP5 isoform X3                                                               | 0.83 | 1.13 | 0.93 | 0.94 | 2.98E-01 | 1.89E-01 | 2.81E-01 | 1.60E-01 |
| XP_011511252.1 | FAIM     | fas apoptotic inhibitory molecule 1 isoform X1                                         | 0.91 | 0.87 | 0.80 | 1.09 | 6.70E-01 | 5.73E-01 | 8.98E-01 | 8.53E-01 |
| NP_005715.1    | TSPAN3   | tetraspanin-3 isoform 1                                                                | 1.07 | 1.16 | 1.24 | 1.34 | 1.01E-01 | 4.05E-02 | 1.21E-01 | 4.15E-02 |
| NP_665813.1    | CACNG6   | voltage-dependent calcium channel gamma-6 subunit isoform a                            | 1.14 | 0.96 | 1.09 | 0.95 | 2.60E-02 | 3.84E-03 | 5.79E-02 | 8.01E-03 |
| NP_001095915.1 | RGS4     | regulator of G-protein signaling 4 isoform 1                                           | 0.71 | 1.00 | 0.70 | 0.94 | 2.96E-01 | 1.87E-01 | 3.47E-01 | 2.21E-01 |
| XP_016880066.1 | SLFN14   | protein SLFN14 isoform X1                                                              | 0.91 | 1.19 | 1.09 | 0.96 | 4.61E-01 | 3.42E-01 | 1.75E-01 | 7.84E-02 |

|                |         |                                                                                               |      |      |      |      |          |          |          |          |
|----------------|---------|-----------------------------------------------------------------------------------------------|------|------|------|------|----------|----------|----------|----------|
| XP_016877800.1 | PDE8A   | high affinity cAMP-specific and IBMX-insensitive 3',5'-cyclic phosphodiesterase 8A isoform X4 | 1.46 | 0.74 | 1.08 | 1.43 | 2.66E-01 | 1.62E-01 | 1.60E-01 | 6.78E-02 |
| XP_011520361.1 | ATP8B4  | probable phospholipid-transporting ATPase IM isoform X8                                       | 1.50 | 0.83 | 1.24 | 1.97 | 1.53E-01 | 7.50E-02 | 1.15E-01 | 3.77E-02 |
| NP_006275.1    | TAF10   | transcription initiation factor TFIID subunit 10                                              | 0.68 | 1.08 | 0.73 | 0.97 | 4.59E-02 | 1.11E-02 | 1.09E-01 | 3.41E-02 |
| NP_001338946.1 | LMF1    | lipase maturation factor 1 isoform 2                                                          | 1.00 | 0.80 | 0.80 | 0.87 | 9.61E-01 | 9.45E-01 | 4.12E-01 | 2.84E-01 |
| XP_016876707.1 | GCHI    | GTP cyclohydrolase 1 isoform X1                                                               | 1.17 | 0.89 | 1.00 | 1.10 | 6.56E-01 | 5.58E-01 | 5.81E-01 | 4.65E-01 |
| XP_006716099.1 | ZCWPW1  | zinc finger CW-type PWWP domain protein 1 isoform X1                                          | 1.30 | 1.02 | 1.32 | 0.95 | 1.62E-01 | 8.17E-02 | 2.30E-01 | 1.17E-01 |
| XP_011534703.1 | TDRD9   | ATP-dependent RNA helicase TDRD9 isoform X7                                                   | 0.64 | 1.11 | 0.71 | 1.03 | 4.78E-02 | 1.19E-02 | 8.39E-02 | 2.02E-02 |
| NP_078966.2    | MUC16   | mucin-16                                                                                      | 0.93 | 1.00 | 0.92 | 1.10 | 2.88E-01 | 1.81E-01 | 3.26E-01 | 2.02E-01 |
| NP_001308879.1 | GPBAR1  | G-protein coupled bile acid receptor 1                                                        | 0.95 | 0.95 | 0.90 | 1.04 | 4.60E-02 | 1.11E-02 | 8.96E-01 | 8.50E-01 |
| NP_001273450.1 | PARP11  | protein mono-ADP-ribosyltransferase PARP11 isoform b                                          | 0.87 | 0.89 | 0.80 | 0.93 | 5.92E-01 | 4.84E-01 | 9.38E-01 | 9.10E-01 |
| NP_659402.1    | TTC16   | tetratricopeptide repeat protein 16 isoform 1                                                 | 0.98 | 1.09 | 1.06 | 0.95 | 6.38E-01 | 5.37E-01 | 3.99E-01 | 2.70E-01 |
| XP_016872335.1 | FBH1    | F-box DNA helicase 1 isoform X7                                                               | 1.08 | 0.88 | 0.95 | 1.02 | 2.12E-01 | 1.19E-01 | 8.20E-02 | 1.91E-02 |
| NP_059140.1    | CHRAC1  | chromatin accessibility complex protein 1                                                     | 0.91 | 0.96 | 0.88 | 1.09 | 3.82E-01 | 2.63E-01 | 5.84E-01 | 4.68E-01 |
| NP_009133.2    | AKAP10  | A-kinase anchor protein 10, mitochondrial isoform 1 precursor                                 | 1.16 | 0.79 | 0.91 | 1.09 | 2.12E-01 | 1.19E-01 | 2.57E-01 | 1.40E-01 |
| NP_003207.1    | TEF     | thyrotroph embryonic factor isoform 1                                                         | 1.02 | 0.91 | 0.92 | 1.13 | 9.93E-01 | 9.92E-01 | 7.49E-01 | 6.61E-01 |
| XP_011517647.1 | TRDMT1  | tRNA (cytosine(38)-C(5))-methyltransferase isoform X6                                         | 1.09 | 0.80 | 0.88 | 1.44 | 1.49E-01 | 7.21E-02 | 2.15E-01 | 1.06E-01 |
| XP_016859917.1 | USP40   | ubiquitin carboxyl-terminal hydrolase 40 isoform X10                                          | 1.14 | 0.90 | 1.03 | 1.19 | 1.02E-01 | 4.09E-02 | 2.70E-01 | 1.51E-01 |
| XP_011534727.1 | SOCS4   | suppressor of cytokine signaling 4 isoform X1                                                 | 0.65 | 1.10 | 0.71 | 0.93 | 9.16E-03 | 4.58E-04 | 1.44E-01 | 5.63E-02 |
| NP_065910.3    | SHROOM3 | protein Shroom3                                                                               | 0.99 | 1.08 | 1.06 | 1.00 | 9.41E-01 | 9.14E-01 | 7.10E-01 | 6.11E-01 |
| NP_004183.2    | ASMTL   | probable bifunctional dTTP/UTP pyrophosphatase/methyltransferase protein isoform 1            | 1.03 | 1.01 | 1.01 | 1.11 | 9.42E-01 | 9.17E-01 | 9.45E-01 | 9.21E-01 |
| XP_006719806.1 | ANHX    | anomalous homeobox protein isoform X1                                                         | 1.17 | 1.10 | 1.27 | 1.21 | 4.37E-01 | 3.18E-01 | 8.26E-01 | 7.56E-01 |
| XP_005267344.1 | PTPN21  | tyrosine-protein phosphatase non-receptor type 21 isoform X1                                  | 1.28 | 0.62 | 0.80 | 1.30 | 8.19E-02 | 2.96E-02 | 1.20E-01 | 4.05E-02 |
| XP_016879849.1 | ARSG    | arylsulfatase G isoform X1                                                                    | 1.00 | 0.77 | 0.76 | 1.07 | 9.77E-01 | 9.66E-01 | 4.67E-01 | 3.40E-01 |
| NP_001138807.1 | UBE2Q2  | ubiquitin-conjugating enzyme E2 Q2 isoform 2                                                  | 0.92 | 1.05 | 0.98 | 1.13 | 6.77E-01 | 5.82E-01 | 5.58E-01 | 4.35E-01 |

**Table S2: Identification transcription factors regulating proteins differentially expressed with rotenone**

| Transcription factor | No. of genes | Fold enrichment | P-value (Hypergeometric test) | Genes mapped                                                                                                                                                                                                                                                                                                                                                                                                                                               |
|----------------------|--------------|-----------------|-------------------------------|------------------------------------------------------------------------------------------------------------------------------------------------------------------------------------------------------------------------------------------------------------------------------------------------------------------------------------------------------------------------------------------------------------------------------------------------------------|
| SP1                  | 64           | 1.149003        | 0.075392                      | NCL; CTTN; HMGB1; TPM3; HDGF; PSAP; NASP; EIF4B; SOD1; HSPE1; YBX1; SRSF1; HNRNPDL; FUS; MARCKSL1; OAT; HPCAL1; HMGN2; HMGB2; PTMA; CALM3; TMSB4X; SET; NUCKS1; EIF2B4; TAF15; PTMS; SRP9; SH3BGRL; MT1X; PDCD5; CD74; CD59; PDCD4; CIRBP; SQSTM1; GAA; ITGA3; EWSR1; CBX5; MYDGF; TNPO2; UAP1L1; RRP15; HAT1; SKP1; CHCHD2; CFDP1; CTSL; PMF1-BGLAP; EP300; TCEAL1; RCN3; DCUN1D3; SETD3; PIP4K2A; ANLN; WDR26; PPP6R1; KLK11; CHCHD5; COQ6; FBXW4; TDRD9 |
| KLF7                 | 45           | 1.296926        | 0.025603                      | NCL; HMGB1; TPM3; HDGF; PSAP; NASP; EIF4B; SOD1; HSPE1; YBX1; HNRNPDL; FUS; MARCKSL1; OAT; HMGN2; HMGB2; NUCKS1; EIF2B4; PTMS; PDCD5; CD59; CIRBP; SQSTM1; GAA; EWSR1; MYDGF; UQCRH; CLTB; TNPO2; UAP1L1; RRP15; HAT1; SKP1; CFDP1; BICD2; EP300; TCEAL1; MCFD2; RCN3; MORF4L1; DCUN1D3; PPP6R1; CHCHD5; BRD9; FHAD1                                                                                                                                       |
| SP4                  | 39           | 1.150687        | 0.173576                      | TPM4; HDGF; NASP; EIF4B; SOD1; FUS; OAT; HMGN2; HMGB2; CTSD; PTMA; CBX3; SET; NUCKS1; PTMS; SRP9; CD59; PDCD4; CIRBP; SQSTM1; ITGA1; ITGA3; CBX5; EDF1; MYDGF; CLTB; UAP1L1; HMGN3; HAT1; CFDP1; PMF1-BGLAP; EP300; TCEAL1; MCFD2; RCN3; MORF4L1; DCUN1D3; ANLN; FHAD1                                                                                                                                                                                     |
| EGR1                 | 37           | 1.475397        | 0.006596                      | HDGF; NASP; EIF4B; SRSF1; HNRNPDL; FUS; MARCKSL1; OAT; HMGN2; HMGB2; NACA; PTMA; CBX3; SET; NUCKS1; TAF15; PRKAR1A; PTMS; SRP9; PDCD4; CIRBP; SQSTM1; EWSR1; CNBP; TNPO2; HAT1; SKP1; EP300; TCEAL1; RIN1; DCUN1D3; SETD3; WDR26; PPP6R1; FHAD1; TDRD9; SOCS4                                                                                                                                                                                              |
| NFYA                 | 33           | 1.663025        | 0.001634                      | HMGB1; NASP; HNRNPDL; OAT; HMGB2; PTMA; CALM3; SET; NUCKS1; TAF15; PRKAR1A; C12orf57; CD74; PDCD4; CIRBP; NQO1; CBX5; CNBP; CLTA; TNPO2; HMGN3; CETN2; P3H3; HLA-C; CTSL; PMF1-BGLAP; ZRANB2; RCN3; SETD3; COA3; COQ6; XRR1; FBXW4                                                                                                                                                                                                                         |
| GABPA                | 27           | 1.281179        | 0.098278                      | NCL; CTTN; NASP; TGOLN2; EIF2B4; BOD1L1; PTMS; C12orf57; ITGA3; EDF1; UQCRH; CLTB; CLTA; HAT1; P3H3; RPL37; CHCHD2; CFDP1; BICD2; MCFD2; C2orf49; DCUN1D3; SETD3; MRPL30; BRD9; COQ6; TAF10                                                                                                                                                                                                                                                                |
| YY1                  | 22           | 2.141919        | 0.000494                      | NASP; YBX1; SRSF1; FUS; HMGN2; HMGB2; CAPRIN1; NACA; PTMA; TMSB4X; TAF15; PRKAR1A; PTMS; SRP9; CIRBP; CBX5; SRSF3; UQCRH; ATE1; EP300; MORF4L1; SETD3                                                                                                                                                                                                                                                                                                      |

|       |    |          |          |                                                                                                                                                              |
|-------|----|----------|----------|--------------------------------------------------------------------------------------------------------------------------------------------------------------|
| ELK1  | 22 | 1.4204   | 0.055205 | NCL; CTTN; SERPINE2; HDGF; MT2A; TGOLN2; EIF2B4; BOD1L1; C12orf57; LAMA4; PDCD4; UQCRH; CLTA; RRP15; HAT1; RPL37; CHCHD2; CFDP1; CHCHD5; COA3; COQ6; TNFAIP1 |
| NRF1  | 22 | 1.384838 | 0.069105 | PSAP; EIF4B; SSB; HSPE1; SRSF1; HNRNPDL; FUS; MARCKSL1; HMGN2; PTMA; TBCA; PAGE5; PDCD5; PDCD4; CIRBP; NDUFAB1; GAA; EWSR1; CBX5; OGT; CFDP1; ANLN           |
| HNF4A | 21 | 0.893119 | 0.753751 | TPM3; SERPINE2; HDGF; HSPE1; HNRNPDL; FUS; MARCKSL1; HPCAL1; CTSD; CAPRIN1; CALM3; PTMS; SH3BGRL; CD74; CD59; ITGA1; ITGA3; UQCRH; ATE1; SETD3; WDR26        |
| ETS1  | 19 | 0.976131 | 0.585392 | CTTN; HMGB1; HDGF; OAT; CTSD; NACA; MT2A; SET; LGALS3BP; LAMA4; ITGA1; CLTB; RPL37; BICD2; DCUN1D3; NDUFA4; WDR26; IGHMBP2; FBXW4                            |
| E2F1  | 18 | 1.942968 | 0.004845 | NCL; HDGF; NASP; EIF4B; SRSF1; HNRNPDL; FUS; MARCKSL1; HMGN2; CAPRIN1; PTMA; CD59; CBX5; CNBP; MCFD2; MORF4L1; SETD3; COA3                                   |
| NFIC  | 17 | 1.068671 | 0.424774 | SERPINE2; HDGF; MARCKSL1; HPCAL1; HMGB2; NUCKS1; PTMS; LAMA4; CD74; SQSTM1; CNBP; HMGN3; SDC2; HLA-C; EP300; KLK11; FBXW4                                    |
| CTCF  | 17 | 0.836887 | 0.824411 | HMGB1; HDGF; MARCKSL1; OAT; CALM3; TAF15; PTMS; SRP9; GAA; ATE1; PMF1-BGLAP; BICD2; ZRANB2; EP300; RIN1; PIP4K2A; FHAD1                                      |
| PPARG | 16 | 1.017819 | 0.511558 | HDGF; S100A1; HSPE1; YBX1; SRSF1; HNRNPDL; FUS; MARCKSL1; HPCAL1; HMGN2; CTSD; CAPRIN1; PRKAR1A; ITGA1; ZRANB2; RCN3                                         |
| ASCL2 | 16 | 1.36886  | 0.12195  | HMGB1; TPM3; HNRNPDL; HMGN2; TMSB4X; SET; PRKAR1A; LAMA4; SH3BGRL; ITGA3; EDF1; TNPO2; HMGN3; DCUN1D3; PIP4K2A; FHAD1                                        |
| RFX1  | 15 | 0.891455 | 0.72476  | TPM3; NASP; HPCAL1; HMGN2; HMGB2; CAPRIN1; PRKAR1A; PTMS; CD74; NQO1; RIN1; MCFD2; WDR26; FHAD1; FBXW4                                                       |
| MYC   | 15 | 1.771409 | 0.021714 | NCL; HMGB1; HDGF; SSB; HNRNPDL; FUS; HMGN2; PTMA; SET; PDCD5; GAA; EWSR1; TNPO2; ZRANB2; ANLN                                                                |
| MYF5  | 14 | 0.967453 | 0.595914 | TPM3; NASP; FUS; HMGN2; CALM3; EIF2B4; LAMA4; ITGA3; EDF1; C11orf58; BICD2; NFU1; RIN1; FHAD1                                                                |
| TCF3  | 13 | 0.779172 | 0.869024 | HNRNPDL; CALM3; LAMA4; ITGA1; ITGA3; RIN1; DCUN1D3; PIP4K2A; WDR26; ZNF740; TNFAIP1; FHAD1; XRRA1                                                            |
| FOS   | 13 | 0.950643 | 0.621148 | CTTN; HDGF; MT2A; TMSB4X; TAF15; SQSTM1; NQO1; ATE1; CLTB; RIN1; ANLN; WDR26; FBXW4                                                                          |
| FOSB  | 13 | 0.950643 | 0.621148 | CTTN; HDGF; MT2A; TMSB4X; TAF15; SQSTM1; NQO1; ATE1; CLTB; RIN1; ANLN; WDR26; FBXW4                                                                          |
| JUN   | 13 | 0.950643 | 0.621148 | CTTN; HDGF; MT2A; TMSB4X; TAF15; SQSTM1; NQO1; ATE1; CLTB; RIN1; ANLN; WDR26; FBXW4                                                                          |

|        |    |          |          |                                                                                           |
|--------|----|----------|----------|-------------------------------------------------------------------------------------------|
| JUNB   | 13 | 0.950643 | 0.621148 | CTTN; HDGF; MT2A; TMSB4X; TAF15; SQSTM1; NQO1; ATE1; CLTB; RIN1; ANLN; WDR26; FBXW4       |
| JUND   | 13 | 0.950643 | 0.621148 | CTTN; HDGF; MT2A; TMSB4X; TAF15; SQSTM1; NQO1; ATE1; CLTB; RIN1; ANLN; WDR26; FBXW4       |
| MEF2A  | 12 | 0.838835 | 0.783434 | SERPINE2; HDGF; OAT; OGT; CNBP; HAT1; ZRANB2; SETD3; PIP4K2A; ANLN; WDR26; MRPL30         |
| POU2F1 | 12 | 0.696815 | 0.939054 | SERPINE2; SSB; OAT; HPCAL1; TMSB4X; C12orf57; LAMA4; SH3BGRL; PDCD4; C11orf58; OGT; SETD3 |
| ZFP161 | 12 | 1.353789 | 0.17589  | PSAP; YBX1; HNRNPDL; HPCAL1; PTMA; CALM3; TBCA; GAA; ITGA3; SETD3; NDUFA4; PPP6R1         |
| TFAP4  | 12 | 1.202546 | 0.295922 | CTTN; TPM4; HDGF; HMGN2; CALM3; TMSB4X; LAMA4; SQSTM1; ITGA3; TNPO2; RIN1; TAF10          |
| EHF    | 11 | 1.873953 | 0.033197 | CTTN; HMGB1; NASP; HSPE1; HPCAL1; SH3BGRL; CLTA; CHCHD2; DCUN1D3; BRD9; COQ6              |
| RREB1  | 11 | 0.660627 | 0.955527 | HDGF; HPCAL1; HMGN2; CAPRIN1; CALM3; NUCKS1; C12orf57; CIRBP; P3H3; SETD3; WDR26          |
| HENMT1 | 11 | 1.233473 | 0.279552 | HMGB1; HPCAL1; HMGN2; CALM3; TMSB4X; PRKAR1A; SKP1; NDUFA4; PPP6R1; TNFAIP1; FHAD1        |
| NHLH1  | 11 | 1.233473 | 0.279552 | HMGB1; HPCAL1; HMGN2; CALM3; TMSB4X; PRKAR1A; SKP1; NDUFA4; PPP6R1; TNFAIP1; FHAD1        |
| ETV7   | 10 | 1.223    | 0.302199 | CTTN; NASP; HPCAL1; BOD1L1; HAT1; CFDP1; BICD2; RIN1; DCUN1D3; BRD9                       |
| RXRA   | 9  | 1.037523 | 0.50581  | TPM3; SERPINE2; HDGF; MARCKSL1; CTSD; PRKAR1A; SH3BGRL; PIP4K2A; FHAD1                    |
| ATF1   | 9  | 1.113561 | 0.420477 | TPM4; HPCAL1; PRKAR1A; SRSF3; CLTB; SDC2; ZNF740; TNFAIP1; TAF10                          |
| PLAU   | 9  | 1.113561 | 0.420477 | TPM4; HPCAL1; PRKAR1A; SRSF3; CLTB; SDC2; ZNF740; TNFAIP1; TAF10                          |
| STRA13 | 9  | 2.011766 | 0.035614 | PSAP; EIF4B; HSPE1; GAA; TCEAL3; TNPO2; CFDP1; TCEAL1; FHAD1                              |
| SOAT1  | 8  | 0.814116 | 0.777414 | HMGB1; HSPE1; FUS; SH3BGRL; HAT1; WDR26; MRPL30; TNFAIP1                                  |
| STAT1  | 8  | 0.814116 | 0.777414 | HMGB1; HSPE1; FUS; SH3BGRL; HAT1; WDR26; MRPL30; TNFAIP1                                  |
| NKX6-1 | 8  | 0.72912  | 0.869128 | HMGB1; HPCAL1; CBX3; LAMA4; SH3BGRL; EWSR1; OGT; SETD3                                    |
| NFE2   | 8  | 1.98183  | 0.049814 | MT2A; TMSB4X; SQSTM1; NQO1; ATE1; CLTB; NFU1; ANLN                                        |
| IRF1   | 7  | 1.107806 | 0.447684 | HPCAL1; MT2A; SET; BOD1L1; TAF15; CD74; SETD3                                             |
| ARID3A | 7  | 0.718748 | 0.865416 | TMSB4X; SET; LAMA4; UQCRH; OGT; FBXW4; TDRD9                                              |
| NR5A1  | 7  | 0.795779 | 0.786672 | PSAP; OAT; PTMS; NQO1; MCFD2; WDR26; FBXW4                                                |
| SF1    | 7  | 0.795779 | 0.786672 | PSAP; OAT; PTMS; NQO1; MCFD2; WDR26; FBXW4                                                |
| HSF1   | 7  | 1.114679 | 0.441264 | HMGB1; TPM4; PSAP; HSPE1; OGT; EP300; FHAD1                                               |

|       |   |          |          |                                                    |
|-------|---|----------|----------|----------------------------------------------------|
| GSC   | 7 | 2.370497 | 0.028995 | TPM3; HDGF; YBX1; OGT; PIP4K2A; WDR26; FBXW4       |
| ESRRA | 7 | 0.979752 | 0.578877 | TPM3; SERPINE2; EIF4B; MARCKSL1; OGT; WDR26; FBXW4 |
| ZIC1  | 7 | 1.639463 | 0.136721 | FUS; NACA; CALM3; SQSTM1; OGT; CLTA; MORF4L1       |
| NR1H3 | 6 | 0.755166 | 0.81539  | TPM3; MARCKSL1; CTSD; PRKAR1A; SH3BGRL; SETD3      |
| RORA  | 6 | 0.659478 | 0.901113 | TPM3; HDGF; OAT; LAMA4; CNBP; FBXW4                |
| HOXD8 | 6 | 0.949774 | 0.611617 | HMGB1; LAMA4; SRSF3; SETD3; COA3; TDRD9            |
| CACD  | 6 | 1.498563 | 0.213117 | FUS; CAPRIN1; CALM3; NUCKS1; ITGA3; OGT            |
| TCF12 | 6 | 0.700882 | 0.866501 | HMGN2; LAMA4; SQSTM1; OGT; TNPO2; TAF10            |
| INSM1 | 6 | 1.581644 | 0.180734 | HMGB1; HDGF; NASP; SQSTM1; RCN3; FHAD1             |
| ATF3  | 6 | 0.962833 | 0.598166 | TPM3; TPM4; TMSB4X; CLTB; MORF4L1; TAF10           |
| GFI1  | 6 | 1.395403 | 0.261778 | SSB; ATE1; PMF1-BGLAP; ZRANB2; EP300; SETD3        |
| ELF3  | 6 | 1.762606 | 0.126884 | HMGB1; SH3BGRL; DCUN1D3; WDR26; COQ6; SOCS4        |
| DLX3  | 5 | 1.55471  | 0.220829 | HDGF; SSB; HPCAL1; SH3BGRL; ZRANB2                 |
| OTX2  | 5 | 1.981762 | 0.109612 | HDGF; NACA; IL13RA2; C11orf58; OGT                 |
| FOXA1 | 5 | 0.798635 | 0.758327 | TPM3; HDGF; ITGA3; HAT1; EP300                     |
| CREB1 | 5 | 0.659922 | 0.883532 | HDGF; SRSF1; CLTB; TNFAIP1; TAF10                  |
| JDP2  | 5 | 0.841549 | 0.716411 | TMSB4X; CLTB; SKP1; TNFAIP1; TAF10                 |
| NR4A2 | 5 | 0.616223 | 0.916021 | MARCKSL1; OAT; NUCKS1; OGT; COA3                   |
| TEAD1 | 5 | 1.521553 | 0.233651 | HDGF; FUS; HMGB2; ITGA3; FBXW4                     |
| DMBX1 | 5 | 1.744818 | 0.160595 | TPM3; C11orf58; TNPO2; HAT1; PIP4K2A               |
| SPI1  | 5 | 0.788824 | 0.767826 | SERPINE2; TMSB4X; CLTA; RPL37; ANLN                |
| HOXA5 | 5 | 0.700986 | 0.849239 | FUS; C12orf57; SH3BGRL; ZRANB2; DCUN1D3            |
| PBX1  | 5 | 0.866534 | 0.691943 | HPCAL1; PDCD4; SDC2; SETD3; ANLN                   |
| TGIF1 | 5 | 0.620991 | 0.912707 | CTTN; HNRNPDL; PRKAR1A; PDCD4; PIP4K2A             |
| CRX   | 5 | 1.839806 | 0.137497 | TPM3; HMGN2; TMSB4X; OGT; SETD3                    |
| HOXA9 | 5 | 0.880798 | 0.678018 | YBX1; HPCAL1; SRSF3; HAT1; SOCS4                   |
| GATA1 | 5 | 0.882008 | 0.676839 | TPM3; SRSF1; FUS; LAMA4; FBXW4                     |
| MAFB  | 4 | 1.460029 | 0.295206 | CALM3; HAT1; SETD3; PIP4K2A                        |
| HNF1A | 4 | 0.618458 | 0.894579 | HSPE1; OGT; DCUN1D3; COA3                          |
| LHX3  | 4 | 0.424744 | 0.987481 | SERPINE2; HPCAL1; SRP9; FHAD1                      |
| SRF   | 4 | 1.112411 | 0.488177 | TPM3; TPM4; CAPRIN1; ANLN                          |

|         |   |          |          |                                 |
|---------|---|----------|----------|---------------------------------|
| FEV     | 4 | 0.977063 | 0.591025 | HMGB1; TPM3; PSAP; ITGA1        |
| NKX2-1  | 4 | 0.722838 | 0.811371 | EWSR1; DCUN1D3; SETD3; WDR26    |
| BACH1   | 4 | 0.793112 | 0.749891 | HDGF; SQSTM1; RIN1; ANLN        |
| HOXB4   | 4 | 0.715791 | 0.817385 | OAT; TMSB4X; OGT; FHAD1         |
| ONECUT1 | 4 | 0.911233 | 0.646133 | SERPINE2; CFDP1; EP300; TAF10   |
| PAX7    | 4 | 1.100501 | 0.496598 | OAT; ATE1; OGT; TDRD9           |
| ELF2    | 4 | 0.658895 | 0.864109 | FUS; HPCAL1; UQCRH; BICD2       |
| ESR1    | 4 | 0.738416 | 0.797949 | TPM3; CTSD; MT2A; BICD2         |
| NR6A1   | 4 | 0.66832  | 0.856638 | SERPINE2; TMSB4X; ZRANB2; FHAD1 |
| RAB40B  | 4 | 0.637641 | 0.880468 | TPM3; FUS; OAT; UQCRH           |
| RARA    | 4 | 0.637641 | 0.880468 | TPM3; FUS; OAT; UQCRH           |
| FOXC1   | 4 | 1.707401 | 0.208647 | HMGB1; TPM3; FUS; SET           |
| POU5F1  | 4 | 1.377831 | 0.33226  | SET; LAMA4; HMG3; ZRANB2        |
| BACH2   | 4 | 0.81837  | 0.727485 | TAF15; RIN1; WDR26; FBXW4       |
| TAL1    | 4 | 0.461761 | 0.977622 | CAPRIN1; LAMA4; WDR26; ZNF740   |
| LMO2    | 4 | 0.842519 | 0.706093 | HDGF; HNRNPDL; HAT1; RIN1       |
| ATF4    | 4 | 1.631519 | 0.231702 | PSAP; PTMA; PRKAR1A; DCUN1D3    |
| SPDEF   | 4 | 2.719141 | 0.060591 | CTTN; NASP; CHCHD2; SOCS4       |
| PITX3   | 3 | 1.455715 | 0.341783 | TPM3; HMG2; FBXW4               |
| HERPUD1 | 3 | 0.916318 | 0.642099 | HAT1; MCFD2; MORF4L1            |
| MAF     | 3 | 0.827834 | 0.709034 | PSAP; SQSTM1; NQO1              |
| OTX1    | 3 | 0.454923 | 0.96473  | ITGA1; IL13RA2; OGT             |
| PITX1   | 3 | 0.454923 | 0.96473  | ITGA1; IL13RA2; OGT             |
| NR5A2   | 3 | 0.793768 | 0.735576 | FUS; CALM3; COA3                |
| TFAP2A  | 3 | 1.49521  | 0.326819 | HMGB1; PTMA; CFDP1              |
| ARNT    | 3 | 0.957244 | 0.612519 | EIF4B; HMG2; GAA                |
| PRRX2   | 3 | 0.646185 | 0.849863 | TMSB4X; SH3BGRL; OGT            |
| VSX2    | 3 | 0.648357 | 0.848251 | PDCD4; OGT; FHAD1               |
| CUX1    | 3 | 1.102194 | 0.516587 | PSAP; HPCAL1; ITGA1             |
| HOXB13  | 3 | 0.733406 | 0.782951 | HPCAL1; HAT1; SDC2              |
| POU6F1  | 3 | 0.588967 | 0.89057  | NFU1; SETD3; FBXW4              |

|        |   |          |          |                       |
|--------|---|----------|----------|-----------------------|
| BARHL1 | 3 | 0.757901 | 0.763726 | HPCAL1; EWSR1; OGT    |
| GBX2   | 3 | 1.277372 | 0.420071 | HPCAL1; PDCD4; FHAD1  |
| LHX4   | 3 | 0.984105 | 0.593668 | HPCAL1; PDCD4; CBX5   |
| ISX    | 3 | 1.455715 | 0.341783 | PDCD4; CBX5; C11orf58 |
| MNX1   | 3 | 1.240407 | 0.438716 | PRKAR1A; LAMA4; OGT   |
| ESR2   | 3 | 0.831402 | 0.706272 | TPM3; HDGF; SQSTM1    |
| NOBOX  | 3 | 0.621212 | 0.868076 | SRSF1; LAMA4; NQO1    |
| RUNX2  | 3 | 1.224656 | 0.446932 | HDGF; PSAP; FUS       |
| ZNF143 | 3 | 0.624228 | 0.865909 | SRSF1; CFDP1; COA3    |
| CDX2   | 3 | 1.524758 | 0.316131 | HAT1; PIP4K2A; FBXW4  |
| FOXJ2  | 3 | 1.290188 | 0.413812 | ITGA3; CNBP; HAT1     |
| ELF1   | 3 | 0.65944  | 0.839971 | SERPINE2; PSAP; FUS   |
| TLX2   | 3 | 6.428579 | 0.011472 | HDGF; CBX5; TNPO2     |
| HOXC9  | 2 | 0.449579 | 0.94141  | OAT; UQCRH            |
| POU3F2 | 2 | 0.326502 | 0.986765 | ATE1; OGT             |
| MEIS2  | 2 | 0.48882  | 0.92069  | HNRNPDL; PIP4K2A      |
| BARX1  | 2 | 0.674363 | 0.802832 | HMGB1; TNFAIP1        |
| HOXA3  | 2 | 0.449579 | 0.94141  | PDCD4; SRSF3          |
| POU4F3 | 2 | 0.374977 | 0.972953 | NUCKS1; LAMA4         |
| VAX2   | 2 | 0.593565 | 0.85653  | PRKAR1A; TDRD9        |
| ZNF238 | 2 | 0.322416 | 0.987673 | OGT; ZRANB2           |
| ZNF513 | 2 | 0.322416 | 0.987673 | OGT; ZRANB2           |
| FOXD1  | 2 | 0.771274 | 0.738345 | TPM3; HDGF            |
| HOXA7  | 2 | 0.48882  | 0.92069  | HPCAL1; TDRD9         |
| PRRX1  | 2 | 0.662228 | 0.81097  | SH3BGRL; OGT          |
| REST   | 2 | 0.336745 | 0.984314 | PSAP; PIP4K2A         |
| SOX1   | 2 | 0.933347 | 0.637648 | HMGB1; PTMA           |
| EBF1   | 2 | 1.256589 | 0.476919 | HDGF; EWSR1           |
| HOXA13 | 2 | 0.833673 | 0.698197 | HMGB1; IL13RA2        |
| HOXB9  | 2 | 0.479718 | 0.925706 | HAT1; FBXW4           |
| PDX1   | 2 | 0.69249  | 0.790672 | SERPINE2; NUCKS1      |



|        |   |          |          |                |
|--------|---|----------|----------|----------------|
| EOMES  | 2 | 0.885238 | 0.666266 | NUCKS1; CHCHD2 |
| T      | 2 | 5.59907  | 0.050001 | FUS; CAPRIN1   |
| TBX5   | 2 | 1.262748 | 0.474367 | CAPRIN1; FBXW4 |
| E4F1   | 2 | 1.63036  | 0.349897 | PTMA; SRSF3    |
| PATZ1  | 2 | 6.777512 | 0.035349 | SRSF1; FUS     |
| DLX2   | 1 | 0.756958 | 0.739949 | HMGB1          |
| PHOX2A | 1 | 0.292861 | 0.970197 | ATE1           |
| NANOG  | 1 | 0.634515 | 0.799826 | EP300          |
| BSX    | 1 | 0.482995 | 0.879696 | HMGB1          |
| GBX1   | 1 | 0.650457 | 0.791722 | HMGB1          |
| POU3F4 | 1 | 0.353672 | 0.945066 | SERPINE2       |
| DBX2   | 1 | 0.317265 | 0.960804 | HMGB1          |
| HOXB7  | 1 | 0.333619 | 0.953964 | NUCKS1         |
| LHX8   | 1 | 0.580456 | 0.827869 | PDCD4          |
| PAX6   | 1 | 0.232397 | 0.988256 | SERPINE2       |
| ZEB1   | 1 | 0.322804 | 0.958533 | MARCKSL1       |
| MSX2   | 1 | 0.37629  | 0.934467 | OGT            |
| ISL2   | 1 | 0.251349 | 0.983485 | HAT1           |
| FOXO1  | 1 | 0.67417  | 0.779827 | UQCRH          |
| HMX1   | 1 | 0.539342 | 0.849637 | SETD3          |
| HOXD10 | 1 | 2.69626  | 0.313765 | HAT1           |
| ITGAL  | 1 | 0.727192 | 0.75398  | YBX1           |
| ESX1   | 1 | 0.486626 | 0.877762 | PRKAR1A        |
| DLX5   | 1 | 0.588371 | 0.823715 | OGT            |
| HOXC10 | 1 | 1.597919 | 0.470645 | UQCRH          |
| HOXA10 | 1 | 6.469138 | 0.145078 | HAT1           |
| PAX5   | 1 | 0.868716 | 0.690482 | CALM3          |
| CEBPD  | 1 | 1.145451 | 0.588659 | SETD3          |
| CEBPA  | 1 | 43.00579 | 0.023225 | FUS            |

**Table S3: Identification transcription factors regulating proteins differentially expressed with Yashtimadhu co-treatment**

| <b>Transcription factor</b> | <b>No. of genes</b> | <b>Fold enrichment</b> | <b>P-value (Hypergeometric test)</b> | <b>Genes mapped</b>                                                                                                                                                                                                                                                    |
|-----------------------------|---------------------|------------------------|--------------------------------------|------------------------------------------------------------------------------------------------------------------------------------------------------------------------------------------------------------------------------------------------------------------------|
| SP1                         | 39                  | 1.22534931             | 0.052255                             | NCL; CTTN; HMGB1; TPM3; HDGF; PSAP; NASP; EIF4B; SOD1; HSPE1; SRSF1; FUS; MARCKSL1; OAT; HPCAL1; HMGN2; HMGB2; CALM3; TMSB4X; SET; NUCKS1; TAF15; PTMS; SH3BGRL; PDCD5; CD59; CIRBP; GAA; ITGA3; EWSR1; UAP1L1; RRP15; SKP1; CHCHD2; TCEAL1; ANLN; KLK11; CD63; LRRC14 |
| KLF7                        | 31                  | 1.56357526             | 0.00292                              | NCL; HMGB1; TPM3; HDGF; PSAP; NASP; EIF4B; SOD1; HSPE1; FUS; MARCKSL1; OAT; HMGN2; HMGB2; NUCKS1; PTMS; PDCD5; CD59; CIRBP; GAA; EWSR1; UQCRH; CLTB; UAP1L1; RRP15; SKP1; BICD2; TCEAL1; MORF4L1; BRD9; CD63                                                           |
| SP4                         | 21                  | 1.08447127             | 0.374024                             | TPM4; HDGF; NASP; EIF4B; SOD1; FUS; OAT; HMGN2; HMGB2; SET; NUCKS1; PTMS; CD59; CIRBP; ITGA3; CLTB; UAP1L1; TCEAL1; MORF4L1; ANLN; LRRC14                                                                                                                              |
| EGR1                        | 20                  | 1.39587825             | 0.065765                             | HDGF; NASP; EIF4B; SRSF1; FUS; MARCKSL1; OAT; HMGN2; HMGB2; NACA; SET; NUCKS1; TAF15; PRKAR1A; PTMS; CIRBP; EWSR1; CNBP; SKP1; TCEAL1                                                                                                                                  |
| NFYA                        | 17                  | 1.4995753              | 0.051564                             | HMGB1; NASP; OAT; HMGB2; CALM3; SET; NUCKS1; TAF15; PRKAR1A; C12orf57; CIRBP; CNBP; CLTA; HLA-C; ZRANB2; XRRA1; LRRC14                                                                                                                                                 |
| GABPA                       | 16                  | 1.32888427             | 0.136734                             | NCL; CTTN; NASP; TGOLN2; PTMS; C12orf57; ITGA3; UQCRH; CLTB; CLTA; RPL37; CHCHD2; BICD2; C2orf49; BRD9; LRRC14                                                                                                                                                         |
| YY1                         | 15                  | 2.55607975             | 0.000569                             | NASP; SRSF1; FUS; HMGN2; HMGB2; CAPRIN1; NACA; TMSB4X; TAF15; PRKAR1A; PTMS; CIRBP; SRSF3; UQCRH; MORF4L1                                                                                                                                                              |
| NRF1                        | 15                  | 1.65260975             | 0.032502                             | PSAP; EIF4B; SSB; HSPE1; SRSF1; FUS; MARCKSL1; HMGN2; TBCA; PAGE5; PDCD5; CIRBP; GAA; EWSR1; ANLN                                                                                                                                                                      |
| HNF4A                       | 13                  | 0.96776814             | 0.601952                             | TPM3; HDGF; HSPE1; FUS; MARCKSL1; HPCAL1; CAPRIN1; CALM3; PTMS; SH3BGRL; CD59; ITGA3; UQCRH                                                                                                                                                                            |
| MYC                         | 13                  | 2.68674378             | 0.000893                             | NCL; HMGB1; HDGF; SSB; FUS; HMGN2; SET; PDCD5; GAA; EWSR1; ZRANB2; ANLN; CD63                                                                                                                                                                                          |
| ETS1                        | 12                  | 1.07914416             | 0.437049                             | CTTN; HMGB1; HDGF; OAT; NACA; MT2A; SET; LGALS3BP; CLTB; RPL37; BICD2; CD63                                                                                                                                                                                            |

|        |    |            |          |                                                                                     |
|--------|----|------------|----------|-------------------------------------------------------------------------------------|
| ELK1   | 12 | 1.35626438 | 0.168074 | NCL; CTTN; HDGF; MT2A; TGOLN2; C12orf57; UQCRH; CLTA; RRP15; RPL37; CHCHD2; TNFAIP1 |
| E2F1   | 12 | 2.26728279 | 0.005828 | NCL; HDGF; NASP; EIF4B; SRSF1; FUS; MARCKSL1; HMGN2; CAPRIN1; CD59; CNBP; MORF4L1   |
| PPARG  | 11 | 1.22483452 | 0.283222 | HDGF; S100A1; HSPE1; SRSF1; FUS; MARCKSL1; HPCAL1; HMGN2; CAPRIN1; PRKAR1A; ZRANB2  |
| NFIC   | 10 | 1.1004861  | 0.425745 | HDGF; MARCKSL1; HPCAL1; HMGB2; NUCKS1; PTMS; CNBP; SDC2; HLA-C; KLK11               |
| CTCF   | 10 | 0.86180193 | 0.746327 | HMGB1; HDGF; MARCKSL1; OAT; CALM3; TAF15; PTMS; GAA; BICD2; ZRANB2                  |
| EHF    | 9  | 2.6835323  | 0.006012 | CTTN; HMGB1; NASP; HSPE1; HPCAL1; SH3BGRL; CLTA; CHCHD2; BRD9                       |
| RREB1  | 9  | 0.94602865 | 0.625636 | HDGF; HPCAL1; HMGN2; CAPRIN1; CALM3; NUCKS1; C12orf57; CIRBP; CD63                  |
| ASCL2  | 9  | 1.34804081 | 0.221454 | HMGB1; TPM3; HMGN2; TMSB4X; SET; PRKAR1A; SH3BGRL; ITGA3; CD63                      |
| HENMT1 | 9  | 1.76635402 | 0.06659  | HMGB1; HPCAL1; HMGN2; CALM3; TMSB4X; PRKAR1A; SKP1; TNFAIP1; CD63                   |
| NHLH1  | 9  | 1.76635402 | 0.06659  | HMGB1; HPCAL1; HMGN2; CALM3; TMSB4X; PRKAR1A; SKP1; TNFAIP1; CD63                   |
| RFX1   | 8  | 0.83245706 | 0.764293 | TPM3; NASP; HPCAL1; HMGN2; HMGB2; CAPRIN1; PRKAR1A; PTMS                            |
| FOS    | 8  | 1.02419637 | 0.528994 | CTTN; HDGF; MT2A; TMSB4X; TAF15; CLTB; ANLN; CD63                                   |
| FOSB   | 8  | 1.02419637 | 0.528994 | CTTN; HDGF; MT2A; TMSB4X; TAF15; CLTB; ANLN; CD63                                   |
| JUN    | 8  | 1.02419637 | 0.528994 | CTTN; HDGF; MT2A; TMSB4X; TAF15; CLTB; ANLN; CD63                                   |
| JUNB   | 8  | 1.02419637 | 0.528994 | CTTN; HDGF; MT2A; TMSB4X; TAF15; CLTB; ANLN; CD63                                   |
| JUND   | 8  | 1.02419637 | 0.528994 | CTTN; HDGF; MT2A; TMSB4X; TAF15; CLTB; ANLN; CD63                                   |
| TFAP4  | 8  | 1.40346612 | 0.20868  | CTTN; TPM4; HDGF; HMGN2; CALM3; TMSB4X; ITGA3; CD63                                 |
| ATF1   | 7  | 1.51606511 | 0.177996 | TPM4; HPCAL1; PRKAR1A; SRSF3; CLTB; SDC2; TNFAIP1                                   |
| PLAU   | 7  | 1.51606511 | 0.177996 | TPM4; HPCAL1; PRKAR1A; SRSF3; CLTB; SDC2; TNFAIP1                                   |
| MYF5   | 7  | 0.84707231 | 0.736337 | TPM3; NASP; FUS; HMGN2; CALM3; ITGA3; BICD2                                         |
| MEF2A  | 6  | 0.73454569 | 0.842483 | HDGF; OAT; CNBP; ZRANB2; ANLN; PHLDA3                                               |
| POU2F1 | 6  | 0.61018225 | 0.94182  | SSB; OAT; HPCAL1; TMSB4X; C12orf57; SH3BGRL                                         |
| ETV7   | 6  | 1.28492454 | 0.325223 | CTTN; NASP; HPCAL1; BICD2; BRD9; CD63                                               |
| ZFP161 | 6  | 1.18547655 | 0.396516 | PSAP; HPCAL1; CALM3; TBCA; GAA; ITGA3                                               |
| RXRA   | 5  | 1.00953514 | 0.559629 | TPM3; HDGF; MARCKSL1; PRKAR1A; SH3BGRL                                              |
| SOAT1  | 5  | 0.8910498  | 0.672235 | HMGB1; HSPE1; FUS; SH3BGRL; TNFAIP1                                                 |
| STAT1  | 5  | 0.8910498  | 0.672235 | HMGB1; HSPE1; FUS; SH3BGRL; TNFAIP1                                                 |
| DLX3   | 5  | 2.72057021 | 0.036862 | HDGF; SSB; HPCAL1; SH3BGRL; ZRANB2                                                  |

|        |   |            |          |                                      |
|--------|---|------------|----------|--------------------------------------|
| TCF3   | 5 | 0.52505488 | 0.97046  | CALM3; ITGA3; TNFAIP1; XRRA1; LRRC14 |
| CACD   | 5 | 2.18599386 | 0.078894 | FUS; CAPRIN1; CALM3; NUCKS1; ITGA3   |
| ATF3   | 5 | 1.40451082 | 0.284652 | TPM3; TPM4; TMSB4X; CLTB; MORF4L1    |
| STRA13 | 5 | 1.95749674 | 0.112524 | PSAP; EIF4B; HSPE1; GAA; TCEAL1      |
| ZIC1   | 5 | 2.05036898 | 0.097188 | FUS; NACA; CALM3; CLTA; MORF4L1      |
| NR1H3  | 4 | 0.88170382 | 0.675089 | TPM3; MARCKSL1; PRKAR1A; SH3BGRL     |
| IRF1   | 4 | 1.10892186 | 0.491919 | HPCAL1; MT2A; SET; TAF15             |
| NKX6-1 | 4 | 0.63873603 | 0.884398 | HMGB1; HPCAL1; SH3BGRL; EWSR1        |
| SRF    | 4 | 1.94659578 | 0.150674 | TPM3; TPM4; CAPRIN1; ANLN            |
| CREB1  | 4 | 0.92429339 | 0.637974 | HDGF; SRSF1; CLTB; TNFAIP1           |
| JDP2   | 4 | 1.17868274 | 0.444397 | TMSB4X; CLTB; SKP1; TNFAIP1          |
| RORA   | 4 | 0.76998203 | 0.774748 | TPM3; HDGF; OAT; CNBP                |
| HSF1   | 4 | 1.11580094 | 0.487037 | HMGB1; TPM4; PSAP; HSPE1             |
| TEAD1  | 4 | 2.13110285 | 0.11901  | HDGF; FUS; HMGB2; ITGA3              |
| ARNT   | 4 | 2.23157419 | 0.105124 | EIF4B; HMGN2; GAA; CD63              |
| ELF2   | 4 | 1.15299383 | 0.461385 | FUS; HPCAL1; UQCRH; BICD2            |
| RAB40B | 4 | 1.11580094 | 0.487037 | TPM3; FUS; OAT; UQCRH                |
| RARA   | 4 | 1.11580094 | 0.487037 | TPM3; FUS; OAT; UQCRH                |
| SPI1   | 4 | 1.10483497 | 0.494839 | TMSB4X; CLTA; RPL37; ANLN            |
| FOXC1  | 4 | 2.98776358 | 0.045265 | HMGB1; TPM3; FUS; SET                |
| HOXA5  | 4 | 0.98180884 | 0.589584 | FUS; C12orf57; SH3BGRL; ZRANB2       |
| NFE2   | 4 | 1.73615705 | 0.199738 | MT2A; TMSB4X; CLTB; ANLN             |
| OTX2   | 3 | 2.08348732 | 0.175533 | HDGF; NACA; IL13RA2                  |
| ARID3A | 3 | 0.54005226 | 0.925169 | TMSB4X; SET; UQCRH                   |
| FOXA1  | 3 | 0.83962976 | 0.702733 | TPM3; HDGF; ITGA3                    |
| FEV    | 3 | 1.28338002 | 0.417624 | HMGB1; TPM3; PSAP                    |
| NR5A1  | 3 | 0.59793157 | 0.888079 | PSAP; OAT; PTMS                      |
| SF1    | 3 | 0.59793157 | 0.888079 | PSAP; OAT; PTMS                      |
| NR4A2  | 3 | 0.64785436 | 0.852283 | MARCKSL1; OAT; NUCKS1                |
| ESRRA  | 3 | 0.73616507 | 0.784184 | TPM3; EIF4B; MARCKSL1                |
| ESR1   | 3 | 0.96991527 | 0.605555 | TPM3; MT2A; BICD2                    |

|        |   |            |          |                     |
|--------|---|------------|----------|---------------------|
| PBX1   | 3 | 0.91101433 | 0.64836  | HPCAL1; SDC2; ANLN  |
| CRX    | 3 | 1.93424465 | 0.203704 | TPM3; HMGN2; TMSB4X |
| ESR2   | 3 | 1.45486245 | 0.342169 | TPM3; HDGF; PHLDA3  |
| INSM1  | 3 | 1.38615373 | 0.370346 | HMGB1; HDGF; NASP   |
| RUNX2  | 3 | 2.14301364 | 0.165686 | HDGF; PSAP; FUS     |
| GATA1  | 3 | 0.92728222 | 0.63633  | TPM3; SRSF1; FUS    |
| SPDEF  | 3 | 3.57161381 | 0.052238 | CTTN; NASP; CHCHD2  |
| PITX3  | 2 | 1.70104803 | 0.331347 | TPM3; HMGN2         |
| HOXC9  | 2 | 0.78671356 | 0.73028  | OAT; UQCRH          |
| BACH1  | 2 | 0.69566016 | 0.790845 | HDGF; ANLN          |
| HOXB4  | 2 | 0.62783908 | 0.836397 | OAT; TMSB4X         |
| NR5A2  | 2 | 0.9275421  | 0.642552 | FUS; CALM3          |
| BARX1  | 2 | 1.18006004 | 0.510931 | HMGB1; TNFAIP1      |
| GSC    | 2 | 1.18940064 | 0.506705 | TPM3; HDGF          |
| HOXD8  | 2 | 0.55584362 | 0.88322  | HMGB1; SRSF3        |
| PRRX2  | 2 | 0.75508741 | 0.751092 | TMSB4X; SH3BGRL     |
| CUX1   | 2 | 1.28794817 | 0.464696 | PSAP; HPCAL1        |
| HOXB13 | 2 | 0.85700792 | 0.68535  | HPCAL1; SDC2        |
| FOXD1  | 2 | 1.34964443 | 0.440664 | TPM3; HDGF          |
| BARHL1 | 2 | 0.88563041 | 0.667685 | HPCAL1; EWSR1       |
| NR6A1  | 2 | 0.5862014  | 0.863819 | TMSB4X; ZRANB2      |
| POU5F1 | 2 | 1.20853258 | 0.498184 | SET; ZRANB2         |
| TGIF1  | 2 | 0.43596748 | 0.950105 | CTTN; PRKAR1A       |
| EBF1   | 2 | 2.19889146 | 0.232311 | HDGF; EWSR1         |
| HOXA13 | 2 | 1.45883543 | 0.402017 | HMGB1; IL13RA2      |
| TAL1   | 2 | 0.40502308 | 0.963528 | CAPRIN1; CD63       |
| HOXA9  | 2 | 0.61836564 | 0.842696 | HPCAL1; SRSF3       |
| GFI1   | 2 | 0.81664234 | 0.710903 | SSB; ZRANB2         |
| EOMES  | 2 | 1.54906958 | 0.37346  | NUCKS1; CHCHD2      |
| T      | 2 | 9.79775565 | 0.017865 | FUS; CAPRIN1        |
| FOXJ2  | 2 | 1.50762429 | 0.386221 | ITGA3; CNBP         |

|         |   |            |          |                |
|---------|---|------------|----------|----------------|
| ELF1    | 2 | 0.77057612 | 0.740861 | PSAP; FUS      |
| ATF4    | 2 | 1.43104897 | 0.411406 | PSAP; PRKAR1A  |
| ELF3    | 2 | 1.0315433  | 0.5842   | HMGB1; SH3BGRL |
| PATZ1   | 2 | 11.8598984 | 0.012415 | SRSF1; FUS     |
| MAFB    | 1 | 0.64350089 | 0.796318 | CALM3          |
| DLX2    | 1 | 1.32459358 | 0.53622  | HMGB1          |
| HNF1A   | 1 | 0.27258246 | 0.97803  | HSPE1          |
| LHX3    | 1 | 0.18720403 | 0.996423 | HPCAL1         |
| HERPUD1 | 1 | 0.5380365  | 0.851552 | MORF4L1        |
| MAF     | 1 | 0.4860813  | 0.87932  | PSAP           |
| OTX1    | 1 | 0.26711802 | 0.979727 | IL13RA2        |
| PITX1   | 1 | 0.26711802 | 0.979727 | IL13RA2        |
| NKX2-1  | 1 | 0.31858729 | 0.961354 | EWSR1          |
| MEIS2   | 1 | 0.42981869 | 0.90895  | LRRC14         |
| TFAP2A  | 1 | 0.87794562 | 0.687333 | HMGB1          |
| BSX     | 1 | 0.84518767 | 0.70123  | HMGB1          |
| DMBX1   | 1 | 0.61552335 | 0.810698 | TPM3           |
| HOXA3   | 1 | 0.39531378 | 0.926435 | SRSF3          |
| PAX7    | 1 | 0.48504047 | 0.879875 | OAT            |
| POU4F3  | 1 | 0.32971681 | 0.956757 | NUCKS1         |
| VAX2    | 1 | 0.52192057 | 0.860163 | PRKAR1A        |
| ZNF238  | 1 | 0.28349927 | 0.974448 | ZRANB2         |
| ZNF513  | 1 | 0.28349927 | 0.974448 | ZRANB2         |
| GBX1    | 1 | 1.13822797 | 0.591387 | HMGB1          |
| GBX2    | 1 | 0.75003725 | 0.74408  | HPCAL1         |
| LHX4    | 1 | 0.57783921 | 0.830413 | HPCAL1         |
| TCF12   | 1 | 0.20611164 | 0.993882 | HMGN2          |
| DBX2    | 1 | 0.5551794  | 0.842418 | HMGB1          |
| HOXA7   | 1 | 0.42981869 | 0.90895  | HPCAL1         |
| HOXB7   | 1 | 0.58379616 | 0.827274 | NUCKS1         |
| MNX1    | 1 | 0.72833269 | 0.75437  | PRKAR1A        |

|        |   |            |          |          |
|--------|---|------------|----------|----------|
| PRRX1  | 1 | 0.58229544 | 0.828064 | SH3BGRL  |
| REST   | 1 | 0.29609907 | 0.97001  | PSAP     |
| SOX1   | 1 | 0.82069037 | 0.711908 | HMGB1    |
| ZEB1   | 1 | 0.56487057 | 0.837272 | MARCKSL1 |
| BACH2  | 1 | 0.3606929  | 0.94304  | TAF15    |
| NOBOX  | 1 | 0.36475862 | 0.941152 | SRSF1    |
| LMO2   | 1 | 0.37133612 | 0.938059 | HDGF     |
| ZNF143 | 1 | 0.36652926 | 0.940324 | SRSF1    |
| FOXO1  | 1 | 1.17972371 | 0.578234 | UQCRH    |
| PDX1   | 1 | 0.608905   | 0.814134 | NUCKS1   |
| TBX5   | 1 | 1.1103316  | 0.600534 | CAPRIN1  |
| E4F1   | 1 | 1.43357223 | 0.508173 | SRSF3    |
| ESX1   | 1 | 0.85154223 | 0.6985   | PRKAR1A  |
| TLX2   | 1 | 3.77468336 | 0.235557 | HDGF     |
| HOXC10 | 1 | 2.79618255 | 0.304324 | UQCRH    |
| PAX5   | 1 | 1.52015803 | 0.487783 | CALM3    |
| CEBPA  | 1 | 75.2553982 | 0.013316 | FUS      |

**Table S4: Protein-protein interaction analysis using STRING**

| <b>Node1</b> | <b>Node2</b> | <b>Node1_external_id</b> | <b>Node2_external_id</b> | <b>Combined score</b> | <b>Experimentally determined interaction</b> |
|--------------|--------------|--------------------------|--------------------------|-----------------------|----------------------------------------------|
| SRSF3        | SRSF1        | 9606.ENSP00000362820     | 9606.ENSP00000258962     | 0.999                 | 0.883                                        |
| HMGB1        | HMGB2        | 9606.ENSP00000345347     | 9606.ENSP00000296503     | 0.998                 | 0.976                                        |
| CLTB         | CLTA         | 9606.ENSP00000309415     | 9606.ENSP00000242285     | 0.953                 | 0.551                                        |
| SET          | HMGB2        | 9606.ENSP00000361777     | 9606.ENSP00000296503     | 0.946                 | 0.379                                        |
| TPM3         | TPM4         | 9606.ENSP00000357516     | 9606.ENSP00000345230     | 0.937                 | 0.387                                        |
| TAF15        | SRSF1        | 9606.ENSP00000474096     | 9606.ENSP00000258962     | 0.936                 | 0                                            |
| SRSF1        | FUS          | 9606.ENSP00000258962     | 9606.ENSP00000254108     | 0.918                 | 0                                            |
| SRSF3        | FUS          | 9606.ENSP00000362820     | 9606.ENSP00000254108     | 0.916                 | 0                                            |
| SSB          | SRSF3        | 9606.ENSP00000386636     | 9606.ENSP00000362820     | 0.91                  | 0                                            |
| CD63         | PSAP         | 9606.ENSP00000447730     | 9606.ENSP00000378394     | 0.906                 | 0                                            |
| EIF4B        | RPL37        | 9606.ENSP00000388806     | 9606.ENSP00000274242     | 0.906                 | 0                                            |
| PSAP         | GAA          | 9606.ENSP00000378394     | 9606.ENSP00000305692     | 0.906                 | 0                                            |
| CALU         | SDC2         | 9606.ENSP00000438248     | 9606.ENSP00000307046     | 0.905                 | 0                                            |
| HLA-C        | MT2A         | 9606.ENSP00000365402     | 9606.ENSP00000245185     | 0.903                 | 0                                            |
| CTTN         | CLTA         | 9606.ENSP00000365745     | 9606.ENSP00000242285     | 0.902                 | 0                                            |
| CTTN         | CLTB         | 9606.ENSP00000365745     | 9606.ENSP00000309415     | 0.902                 | 0                                            |
| CALU         | TGOLN2       | 9606.ENSP00000438248     | 9606.ENSP00000386443     | 0.902                 | 0.068                                        |
| CD59         | GAA          | 9606.ENSP00000379191     | 9606.ENSP00000305692     | 0.9                   | 0                                            |
| TGOLN2       | CLTA         | 9606.ENSP00000386443     | 9606.ENSP00000242285     | 0.9                   | 0                                            |
| TGOLN2       | CTTN         | 9606.ENSP00000386443     | 9606.ENSP00000365745     | 0.9                   | 0                                            |
| TGOLN2       | SDC2         | 9606.ENSP00000386443     | 9606.ENSP00000307046     | 0.9                   | 0                                            |
| TGOLN2       | CLTB         | 9606.ENSP00000386443     | 9606.ENSP00000309415     | 0.9                   | 0                                            |
| CD63         | GAA          | 9606.ENSP00000447730     | 9606.ENSP00000305692     | 0.9                   | 0                                            |
| SSB          | SRSF1        | 9606.ENSP00000386636     | 9606.ENSP00000258962     | 0.877                 | 0.161                                        |



|         |       |                      |                      |       |       |
|---------|-------|----------------------|----------------------|-------|-------|
| C2orf49 | FUS   | 9606.ENSP00000258457 | 9606.ENSP00000254108 | 0.859 | 0.855 |
| CIRBP   | SRSF3 | 9606.ENSP00000466897 | 9606.ENSP00000362820 | 0.851 | 0.844 |
| ATPIF1  | GAA   | 9606.ENSP00000335203 | 9606.ENSP00000305692 | 0.847 | 0.847 |
| CNBP    | EIF4B | 9606.ENSP00000410769 | 9606.ENSP00000388806 | 0.814 | 0.085 |
| SSB     | NCL   | 9606.ENSP00000386636 | 9606.ENSP00000318195 | 0.745 | 0.545 |
| TAF15   | SRSF3 | 9606.ENSP00000474096 | 9606.ENSP00000362820 | 0.734 | 0     |
| SOD1    | HSPE1 | 9606.ENSP00000270142 | 9606.ENSP00000233893 | 0.726 | 0.363 |

**Table S5: Lead metabolites identified in Yashtimadhu choorna**

| Compound            | Molecular Formula | PUBCHEM CID | Precursor mass, m/z (Da) | Average Retention time, min | Polarity | Adduct | Average Peak intensity | Average Peak area | Fragment mass, (Da)                     | % Abundance | Canonical SMILES ID                                                                                                                 |
|---------------------|-------------------|-------------|--------------------------|-----------------------------|----------|--------|------------------------|-------------------|-----------------------------------------|-------------|-------------------------------------------------------------------------------------------------------------------------------------|
| Glycyrrhizic acid   | C42H62O16         | 3495        | 821.40                   | 13.34                       | -        | [M-H]- | 1.08E+08               | 1.14E+09          | 351.24;<br>469.08;<br>627.12;<br>759.12 | 0.234       | <chem>CC1(C2CCC3(C(C2(CCC1OC4C(C(C(C(O4)C(=O)O)O)O)OC5C(C(C(C(O5)C(=O)O)O)O)O)C)C(=O)C=C6C3(CCC7(C6CC(CC7)(C)C(=O)O)C)C)C</chem>    |
| Glabridin           | C20H20O4          | 124052      | 323.52                   | 14.64                       | -        | [M-H]- | 9.28E+06               | 1.19E+08          | 109.02;<br>135.24;<br>201.24            | 0.024       | <chem>CC1(C=CC2=C(O1)C=CC3=C2OCC(C3)C4=C(C=C(C=C4)O)O)C</chem>                                                                      |
| Licoricesaponin G2  | C42H62O17         | 14891565    | 839.40                   | 12.55                       | +        | [M+H]+ | 1.99E+08               | 2.05E+09          | 469.20;<br>487.20;<br>451.32            | 0.226       | <chem>CC12CCC(CC1C3=CC(=O)C4C5(CCC(C(C5C)CC4(C3(CC2)C)C)(C)CO)OC6C(C(C(C(O6)C(=O)O)O)O)OC7C(C(C(C(O7)C(=O)O)O)O)O)C(C)C(=O)O</chem> |
| Liquiritin apioside | C26H30O13         | 10076238    | 551.76                   | 11.98                       | +        | [M+H]+ | 4.50E+07               | 3.01E+08          | 256.68;<br>418.92;<br>137.28            | 0.033       | <chem>C1C(OC2=C(C1=O)C=CC(=C2)O)C3=CC=C(C=C3)OC4C(C(C(C(O4)CO)O)O)OC5C(C(CO5)(CO)O)O</chem>                                         |
